# Supplementary material
Source: PubMed Central journal article supplement (PMC7155936)
Supplement: NIHMS1551699-supplement-1.pdf [file NIHMS1551699-supplement-1.pdf]

# Differentiation and Functionalization of Adjacent, Remote C–H Bonds

Hang Shi,<sup>1</sup> Yi Lu,<sup>1</sup> Jiang Weng,<sup>1</sup> Katherine L. Bay,<sup>2</sup> Xiangyang Chen,<sup>2</sup> Keita Tanaka,<sup>1</sup> Pritha Verma,<sup>1</sup>

Kendall N. Houk,<sup>2\*</sup> Jin-Quan Yu<sup>1\*</sup>

<sup>1</sup>*The Scripps Research Institute, 10550 N. Torrey Pines Road, La Jolla, CA 92037, USA.*

<sup>2</sup>*Department of Chemistry and Biochemistry, University of California, Los Angeles, CA 90095-1569, USA.*

## TABLE OF CONTENTS

|                                                                                 |     |
|---------------------------------------------------------------------------------|-----|
| GENERAL INFORMATION.....                                                        | 2   |
| EXPERIMENTAL SECTION.....                                                       | 3   |
| I. Preparation of Templates and Substrates .....                                | 3   |
| A. Preparation of Templates.....                                                | 3   |
| B. Preparation of Substrates .....                                              | 4   |
| II. Remote Site-Selective Arylation .....                                       | 6   |
| A. Optimization of the Reaction Conditions.....                                 | 6   |
| B. Pd-Catalyzed Remote Arylation of Benzoazines .....                           | 8   |
| C. Pd-Catalyzed C7 Arylation of Tetrahydroisoquinolines .....                   | 22  |
| D. Pd-Catalyzed <i>para</i> -Arylation of Phenylpropanoic Acid Derivatives..... | 25  |
| X-RAY CRYSTALLOGRAPHIC DATA .....                                               | 28  |
| COMPUTATIONAL STUDY .....                                                       | 30  |
| I. Mechanistic Study .....                                                      | 30  |
| II. Fukui Indices .....                                                         | 61  |
| NMR SPECTRA .....                                                               | 73  |
| REFERENCES .....                                                                | 147 |

## GENERAL INFORMATION

### Solvents

Dry acetonitrile (MeCN), tetrahydrofuran (THF), dichloromethane (DCM), and toluene were purchased from Sigma-Aldrich. 1,1,1,3,3,3-Hexafluoro-2-propanol (HFIP) was purchased from Oakwood. Chloroform- $d_1$  and acetonitrile- $d_3$  were purchased from Cambridge Isotope Laboratories.

### Chromatography

Analytical thin layer chromatography was performed on 0.25 mm silica gel 60-F254. Visualization was carried out with UV light and Vogel's permanganate. Preparative TLC was used to purify reactions run at 0.1 mmol scale out of convenience and was conducted using silica gel plates, unless otherwise stated.

### Spectroscopy and Instruments

$^1\text{H}$  NMR was recorded on Bruker DRX-600 instrument (600 MHz). Chemical shifts were quoted in parts per million (ppm) referenced to 7.26 ppm of chloroform- $d$ , or the center peak of the pentet at 1.94 ppm of acetonitrile- $d_3$ .  $^{13}\text{C}$  NMR spectra were recorded on Bruker DRX-600 instrument (151 MHz), and were fully decoupled by broad band proton decoupling. Chemical shifts were reported in ppm referenced to the center peak of a triplet at 77.16 ppm of chloroform- $d$ , or the center peak of a septet at 1.32 ppm of acetonitrile- $d_3$ .  $^{19}\text{F}$  NMR spectra were recorded on Bruker AMX-400 instrument (376 MHz), and were fully decoupled by broad band proton decoupling. The following abbreviations (or combinations thereof) were used to explain multiplicities: s = singlet, d = doublet, t = triplet, q = quartet, p = pentet, sext = sextet, sep = septet, m = multiplet, br = broad. Coupling constants,  $J$ , were reported in Hertz unit (Hz). High-resolution mass spectra (HRMS) were recorded on a Waters mass spectrometer using ESI-TOF (electrospray ionization-time of flight). The single crystal X-ray diffraction studies were carried out on a Bruker Kappa APEX-II CCD diffractometer equipped with Mo  $K\alpha$  radiation ( $\lambda = 0.71073 \text{ \AA}$ ).

### Starting materials

All substrates were used as received from commercial suppliers, unless otherwise stated.  $\text{Pd}(\text{OAc})_2$ ,  $\text{AgOAc}$ ,  $\text{Ag}_2\text{CO}_3$ , and Ac-Gly-OH were purchased from Sigma-Aldrich. Methyl bicyclo[2.2.1]hept-2-ene-2-carboxylate (NBE- $\text{CO}_2\text{Me}$ ) was reported in the previous literature<sup>1</sup>. Templates (**T1**-MeCN, **T2**-MeCN, **T3**-MeCN,) were reported in the previous literature<sup>2</sup>. Compounds **1u**<sup>3</sup>, **1v**<sup>4</sup>, **3a**<sup>5</sup>, and **5b**<sup>6</sup> were reported in the previous literatures.

## EXPERIMENTAL SECTION

### I. Preparation of Templates and Substrates

#### A. Preparation of Templates

Templates were synthesized following the literature procedures<sup>2</sup>.

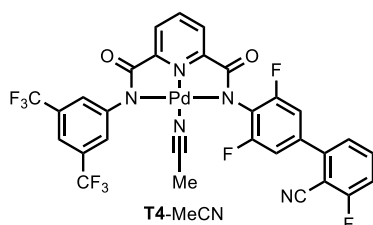

#### Palladium-*N*<sup>2</sup>-(3,5-bis(trifluoromethyl)phenyl)-*N*<sup>6</sup>-(2'-cyano-3,3',5-trifluoro-[1,1'-biphenyl]-4-yl)pyridine-2,6-dicarboxamide complex (T4-MeCN)

<sup>1</sup>H NMR (600 MHz, CD<sub>3</sub>CN) δ 8.33 (t, *J* = 7.8 Hz, 1H), 7.92 (dd, *J* = 7.8, 1.3 Hz, 1H), 7.90–7.86 (m, 3H), 7.80–7.74 (m, 1H), 7.69 (s, 1H), 7.45 (d, *J* = 7.8 Hz, 1H), 7.38 (t, *J* = 8.8 Hz, 1H), 7.27 (d, *J* = 8.2 Hz, 2H); <sup>13</sup>C NMR (151 MHz, CD<sub>3</sub>CN) δ 170.08, 169.56, 164.86 (d, *J* = 255.8 Hz), 158.71 (dd, *J* = 248.1, 6.6 Hz), 152.92, 151.08, 149.65, 145.52, 143.81, 136.39, 136.32, 131.73 (q, *J* = 32.7 Hz), 127.85, 127.82–127.68 (m), 127.43, 126.95 (d, *J* = 3.3 Hz), 125.50 (t, *J* = 16.8 Hz), 124.65 (q, *J* = 272.3 Hz), 116.63 (d, *J* = 19.8 Hz), 114.51, 113.27 (dd, *J* = 19.6, 6.0 Hz), 101.34 (d, *J* = 16.0 Hz); <sup>19</sup>F NMR (376 MHz, CD<sub>3</sub>CN) δ -63.50, -108.24, -117.02. HRMS (ESI-TOF) *m/z* calc'd for C<sub>30</sub>H<sub>14</sub>F<sub>9</sub>N<sub>5</sub>O<sub>2</sub>Pd [M+H]<sup>+</sup>: 754.0111; found: 754.0103.

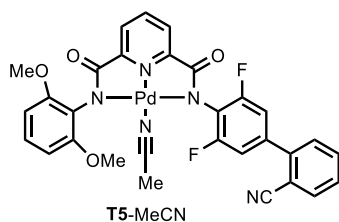

#### Palladium-*N*<sup>2</sup>-(2'-cyano-3,5-difluoro-[1,1'-biphenyl]-4-yl)-*N*<sup>6</sup>-(2,6-dimethoxyphenyl)pyridine-2,6-dicarboxamide complex (T5-MeCN)

<sup>1</sup>H NMR (600 MHz, CD<sub>3</sub>CN) δ 8.27 (t, *J* = 7.8 Hz, 1H), 7.87–7.81 (m, 2H), 7.78 (dd, *J* = 7.8, 1.2 Hz, 1H), 7.73 (td, *J* = 7.7, 1.3 Hz, 1H), 7.61 (d, *J* = 7.9 Hz, 1H), 7.55 (td, *J* = 7.7, 1.2 Hz, 1H), 7.21 (d, *J* = 8.3 Hz, 2H), 7.14 (t, *J* = 8.4 Hz, 1H), 6.63 (d, *J* = 8.5 Hz, 2H), 3.82 (s, 6H); <sup>13</sup>C NMR (151 MHz, CD<sub>3</sub>CN) δ 169.29, 168.88, 159.34, 159.30, 157.70, 157.66, 156.15, 152.90, 151.51, 143.81, 143.79, 143.33, 136.87, 136.81, 136.74, 134.72, 134.32, 130.98, 129.61, 127.10, 126.92, 126.74, 125.71, 125.49, 119.27, 113.21, 113.17, 113.07, 113.03, 111.89, 105.23, 56.58; <sup>19</sup>F NMR (376 MHz, CD<sub>3</sub>CN) δ -117.57. HRMS (ESI-TOF) *m/z* calc'd for C<sub>30</sub>H<sub>22</sub>F<sub>2</sub>N<sub>5</sub>O<sub>4</sub>Pd [M+H]<sup>+</sup>: 660.0669; found: 660.0659.

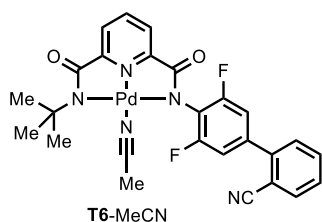

**Palladium-*N*<sup>2</sup>-(*tert*-butyl)-*N*<sup>6</sup>-(2'-cyano-3,5-difluoro-[1,1'-biphenyl]-4-yl)pyridine-2,6-dicarboxamide complex (T6-MeCN)**

<sup>1</sup>H NMR (600 MHz, CD<sub>3</sub>CN) δ 8.17 (t, *J* = 7.8 Hz, 1H), 7.86 (dd, *J* = 7.8, 0.9 Hz, 1H), 7.76 (td, *J* = 7.7, 1.4 Hz, 1H), 7.70 (d, *J* = 7.8 Hz, 2H), 7.63 (d, *J* = 7.8 Hz, 1H), 7.58 (td, *J* = 7.6, 1.2 Hz, 1H), 7.29 (d, *J* = 8.2 Hz, 2H), 1.40 (s, 9H); <sup>13</sup>C NMR (151 MHz, CD<sub>3</sub>CN) δ 169.29, 168.88, 158.50 (dd, *J* = 247.6, 6.6 Hz), 156.15, 152.90, 151.51, 143.81, 143.79, 143.33, 136.81 (t, *J* = 9.9 Hz), 134.72, 134.32, 130.98, 129.61, 127.10, 126.92, 126.74, 125.71 (t, *J* = 16.7 Hz), 125.49, 119.27, 113.12 (dd, *J* = 21.1, 6.0 Hz), 111.89, 105.23, 56.58; <sup>19</sup>F NMR (376 MHz, CD<sub>3</sub>CN) δ -118.18. HRMS (ESI-TOF) *m/z* calc'd for C<sub>26</sub>H<sub>22</sub>F<sub>2</sub>N<sub>5</sub>O<sub>2</sub>Pd [M+H]<sup>+</sup>: 580.0771; found: 580.0762.

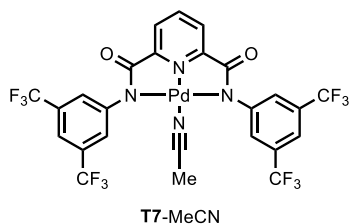

**Palladium-*N*<sup>2</sup>,*N*<sup>6</sup>-bis(3,5-bis(trifluoromethyl)phenyl)pyridine-2,6-dicarboxamide complex (T7-MeCN)**

<sup>1</sup>H NMR (600 MHz, CD<sub>3</sub>CN) δ 8.30 (t, *J* = 7.8 Hz, 1H), 7.90 (s, 4H), 7.88 (d, *J* = 7.8 Hz, 2H), 7.72 (s, 2H); <sup>13</sup>C NMR (151 MHz, CD<sub>3</sub>CN) δ 170.08, 152.51, 149.42, 143.76, 131.76 (q, *J* = 33.0 Hz), 128.15–127.98 (m), 127.67, 124.63 (q, *J* = 271.8 Hz); <sup>19</sup>F NMR (376 MHz, CD<sub>3</sub>CN) δ -63.43. HRMS (ESI-TOF) *m/z* calc'd for C<sub>25</sub>H<sub>13</sub>F<sub>12</sub>N<sub>4</sub>O<sub>2</sub>Pd [M+H]<sup>+</sup>: 734.9876; found: 734.9883.

## B. Preparation of Substrates

Substrates (**3b**, **3f**) were synthesized following the literature procedures<sup>5</sup>.

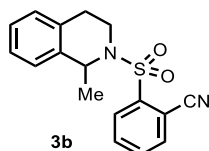

**2-((1-Methyl-3,4-dihydroisoquinolin-2(1H)-yl)sulfonyl)benzotrile (3b)**

<sup>1</sup>H NMR (600 MHz, CDCl<sub>3</sub>) δ 8.12 (ddd, *J* = 8.0, 1.3, 0.4 Hz, 1H), 7.78 (ddd, *J* = 7.6, 1.4, 0.4 Hz, 1H), 7.69 (td, *J* = 7.8, 1.4 Hz, 1H), 7.62 (td, *J* = 7.6, 1.3 Hz, 1H), 7.19–7.10 (m, 2H), 7.07 (d, *J* = 7.7 Hz, 1H), 7.03 (d, *J* = 7.4 Hz, 1H), 5.19 (q, *J* = 6.9 Hz, 1H), 4.14–4.04 (m, 1H), 3.55 (ddd, *J* = 14.0, 11.9, 4.2 Hz, 1H), 2.94–2.82 (m, 1H), 2.77–2.66 (m, 1H), 1.49 (d, *J* = 6.8 Hz, 3H); <sup>13</sup>C NMR (151 MHz, CDCl<sub>3</sub>) δ 143.69, 137.29, 135.52, 132.90, 132.48, 132.41, 129.98, 129.19, 126.93, 126.90, 126.50, 116.16, 110.42, 52.39, 39.02, 28.27, 23.31. HRMS (ESI-TOF) *m/z* calc'd for C<sub>17</sub>H<sub>17</sub>N<sub>2</sub>O<sub>2</sub>S [M+H]<sup>+</sup>: 313.1005; found: 313.1012.

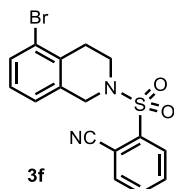

**2-((5-Bromo-3,4-dihydroisoquinolin-2(1H)-yl)sulfonyl)benzotrile (3f)**

<sup>1</sup>H NMR (600 MHz, CDCl<sub>3</sub>) δ 8.13 (dd, *J* = 8.2, 1.2 Hz, 1H), 7.85 (dd, *J* = 7.8, 1.3 Hz, 1H), 7.76 (td, *J* = 7.8, 1.4 Hz, 1H), 7.69 (td, *J* = 7.6, 1.3 Hz, 1H), 7.43 (dd, *J* = 6.6, 2.6 Hz, 1H), 7.09–7.00 (m, 2H), 4.50 (s, 2H), 3.64 (t, *J* = 6.1 Hz, 2H), 2.93 (t, *J* = 6.1 Hz, 2H); <sup>13</sup>C NMR (151 MHz, CDCl<sub>3</sub>) δ 141.02, 135.69, 133.97, 133.04,



132.95, 132.93, 131.19, 130.40, 127.79, 125.62, 125.40, 116.21, 110.93, 47.45, 43.65, 29.51. HRMS (ESI-TOF)  $m/z$  calc'd for  $C_{16}H_{14}BrN_2O_2S$   $[M+H]^+$ : 376.9954; found: 376.9950.

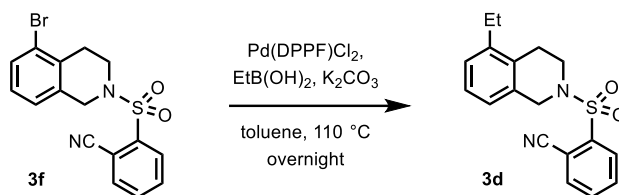

### 2-((5-Ethyl-3,4-dihydroisoquinolin-2(1H)-yl)sulfonyl)benzonitrile (3d)

Aryl bromide **3f** (0.19 g, 0.5 mmol, 1.0 equiv), Pd(DPPF)Cl<sub>2</sub> (36.6 mg, 0.05 mmol, 10 mol%), EtB(OH)<sub>2</sub> (73.9 mg, 1.0 mmol, 2.0 equiv.), and K<sub>2</sub>CO<sub>3</sub> (0.21 g, 1.5 mmol, 3.0 equiv.) were added to a flame-dried Schlenk tube. The Schlenk tube was evacuated and back-filled with nitrogen, and then toluene (5 mL) was added to the mixture. The Schlenk tube was immersed into a pre-heated oil bath at 110 °C overnight. The oil bath was removed, and the Schlenk tube was allowed to cool to room temperature. Water was added into the reaction mixture, which was then extracted with EtOAc. The combined organic layers were dried with Na<sub>2</sub>SO<sub>4</sub>. After the organic solvent was concentrated by rotary evaporation, the residue was purified by silica gel chromatography (hexanes/EtOAc = 2:1 v/v) to afford 0.14 g compound **3d** as a white solid (85% yield).

<sup>1</sup>H NMR (600 MHz, CDCl<sub>3</sub>) δ 8.13 (d,  $J$  = 8.0 Hz, 1H), 7.85 (dd,  $J$  = 7.6, 1.3 Hz, 1H), 7.75 (td,  $J$  = 7.8, 1.3 Hz, 1H), 7.67 (td,  $J$  = 7.6, 1.1 Hz, 1H), 7.13 (t,  $J$  = 7.6 Hz, 1H), 7.06 (d,  $J$  = 7.4 Hz, 1H), 6.91 (d,  $J$  = 7.6 Hz, 1H), 4.45 (s, 2H), 3.68 (t,  $J$  = 6.0 Hz, 2H), 2.91 (t,  $J$  = 6.0 Hz, 2H), 2.56 (q,  $J$  = 7.6 Hz, 2H), 1.17 (t,  $J$  = 7.6 Hz, 3H); <sup>13</sup>C NMR (151 MHz, CDCl<sub>3</sub>) δ 142.51, 141.00, 135.69, 132.95, 132.77, 131.41, 131.05, 130.46, 126.69, 126.49, 124.17, 116.34, 111.05, 47.74, 43.78, 25.67, 25.52, 14.33. HRMS (ESI-TOF)  $m/z$  calc'd for  $C_{18}H_{19}N_2O_2S$   $[M+H]^+$ : 327.1162; found: 327.1171.

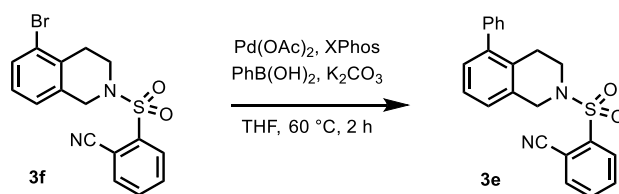

### 2-((5-Phenyl-3,4-dihydroisoquinolin-2(1H)-yl)sulfonyl)benzonitrile (3e)

Aryl bromide **3f** (0.19 g, 0.5 mmol, 1.0 equiv.), Pd(OAc)<sub>2</sub> (2.2 mg, 0.1 mmol, 20 mol%), XPhos (95.3 mg, 0.2 mmol, 40 mol%), PhB(OH)<sub>2</sub> (0.12 g, 1.0 mmol, 2.0 equiv.), and K<sub>2</sub>CO<sub>3</sub> (0.14 g, 1.0 mmol, 2.0 equiv.) were added to a flame-dried Schlenk tube. The Schlenk tube was evacuated and back-filled with nitrogen, and then THF (3 mL) were added to the mixture. The Schlenk tube was immersed into a pre-heated oil bath at 60 °C. After 2 h, the oil bath was removed, and the Schlenk tube was allowed to cool to room temperature. Water was added into the reaction mixture, which was then extracted with EtOAc. The combined organic layers were dried with Na<sub>2</sub>SO<sub>4</sub>. After the organic solvent was concentrated by rotary evaporation, the residue was purified by silica gel chromatography (hexanes/EtOAc = 2:1 v/v) to afford 0.14 g compound **3e** as a white solid (75% yield).

<sup>1</sup>H NMR (600 MHz, CDCl<sub>3</sub>) δ 8.12 (d,  $J$  = 1.4 Hz, 1H), 7.86 (d,  $J$  = 7.6 Hz, 1H), 7.76 (t,  $J$  = 7.8 Hz, 1H), 7.69 (t,  $J$  = 7.6 Hz, 1H), 7.40 (t,  $J$  = 7.4 Hz, 2H), 7.35 (t,  $J$  = 7.4 Hz, 1H), 7.26–7.21 (m, 3H), 7.13 (d,  $J$  = 7.4 Hz, 1H), 7.09 (d,  $J$  = 7.7 Hz, 1H), 4.56 (s, 2H), 3.54 (t,  $J$  = 6.0 Hz, 2H), 2.83 (t,  $J$  = 5.9 Hz, 2H); <sup>13</sup>C NMR (151 MHz, CDCl<sub>3</sub>) δ 142.26, 141.01, 140.60, 135.70, 132.98, 132.81, 131.86, 131.10, 130.48, 129.12, 128.51, 128.35, 127.33, 126.43, 125.66, 116.31, 111.01, 47.51, 43.78, 27.74. HRMS (ESI-TOF)  $m/z$  calc'd for  $C_{22}H_{19}N_2O_2S$   $[M+H]^+$ : 375.1162; found: 375.1165.

Substrate (**5a**) was synthesized following the literature procedures<sup>9</sup>.

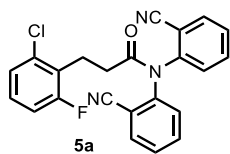

### 3-(2-Chloro-6-fluorophenyl)-*N,N*-bis(2-cyanophenyl)propanamide (**5a**)

<sup>1</sup>H NMR (600 MHz, CDCl<sub>3</sub>) δ 7.91–7.31 (m, 8H), 7.13–7.05 (m, 2H), 6.94–6.86 (m, 1H), 3.25 (t, *J* = 8.5 Hz, 2H), 2.58 (br, 2H); <sup>13</sup>C NMR (151 MHz, CDCl<sub>3</sub>) δ 171.60, 161.53 (d, *J* = 248.1 Hz), 144.13, 135.37 (d, *J* = 6.1 Hz), 134.96, 134.68, 134.37, 134.01, 130.75, 129.65, 129.42, 128.47, 128.34 (d, *J* = 9.4 Hz), 126.25 (d, *J* = 18.7 Hz), 125.36 (d, *J* = 3.3 Hz), 117.21, 116.50, 114.19 (d, *J* = 23.1 Hz), 113.34, 113.13, 33.59, 22.49 (d, *J* = 3.3 Hz); <sup>19</sup>F NMR (376 MHz, CDCl<sub>3</sub>) δ -113.77. HRMS (ESI-TOF) *m/z* calc'd for C<sub>23</sub>H<sub>16</sub>ClF<sub>2</sub>N<sub>3</sub>O [M+H]<sup>+</sup>: 404.0960; found: 404.0967.

## II. Remote Site-Selective Arylation

### A. Optimization of the Reaction Conditions

**Table 1. Ligand screening<sup>a</sup>**

| Ac-Gly-OH   | Ac-Ala-OH   | Ac-Val-OH   | TFA-Gly-OH | Fmoc-Gly-OH | AcHN-CH <sub>2</sub> -CH <sub>2</sub> -NMe <sub>2</sub> | AcHN-CH <sub>2</sub> -CH <sub>2</sub> -SPh |
|-------------|-------------|-------------|------------|-------------|---------------------------------------------------------|--------------------------------------------|
| 41%, 38% SM | 36%, 55% SM | 21%, 67% SM | 7%, 85% SM | 10%, 80% SM | <5%, 90% SM                                             | <5%, 90% SM                                |

<sup>a</sup>The yields were determined by <sup>1</sup>H-NMR using CHCl<sub>2</sub>CHCl<sub>2</sub> as the standard.

**Table 2. Temperatures screening<sup>a</sup>**

| T      | yield       |  |  |
|--------|-------------|--|--|
| 120 °C | 33%, 38% SM |  |  |
| 100 °C | 41%, 38% SM |  |  |
| 80 °C  | 45%, 41% SM |  |  |
| 60 °C  | 30%, 55% SM |  |  |

<sup>a</sup>The yields were determined by <sup>1</sup>H-NMR using CHCl<sub>2</sub>CHCl<sub>2</sub> as the standard.

**Table 3. Palladium screening<sup>a</sup>**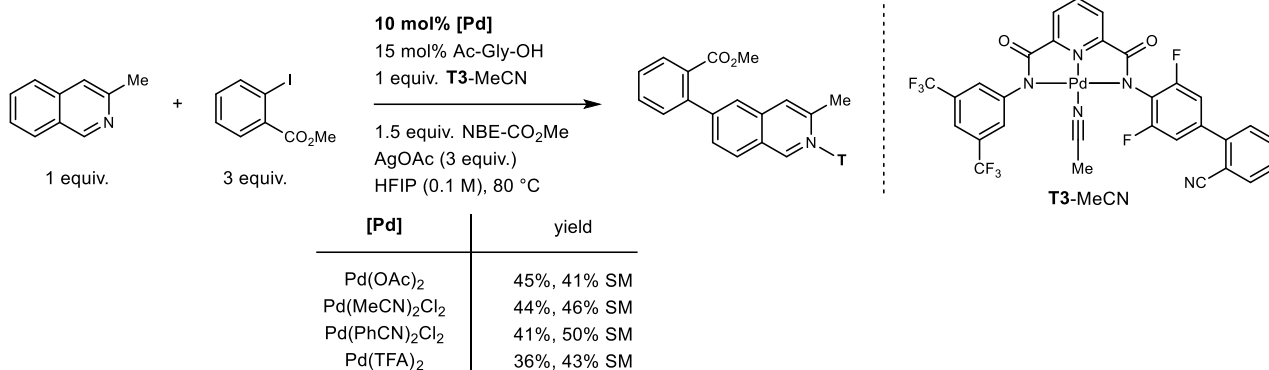

<sup>a</sup>The yields were determined by <sup>1</sup>H-NMR using CHCl<sub>2</sub>CHCl<sub>2</sub> as the standard.

**Table 4. Additive screening<sup>a</sup>**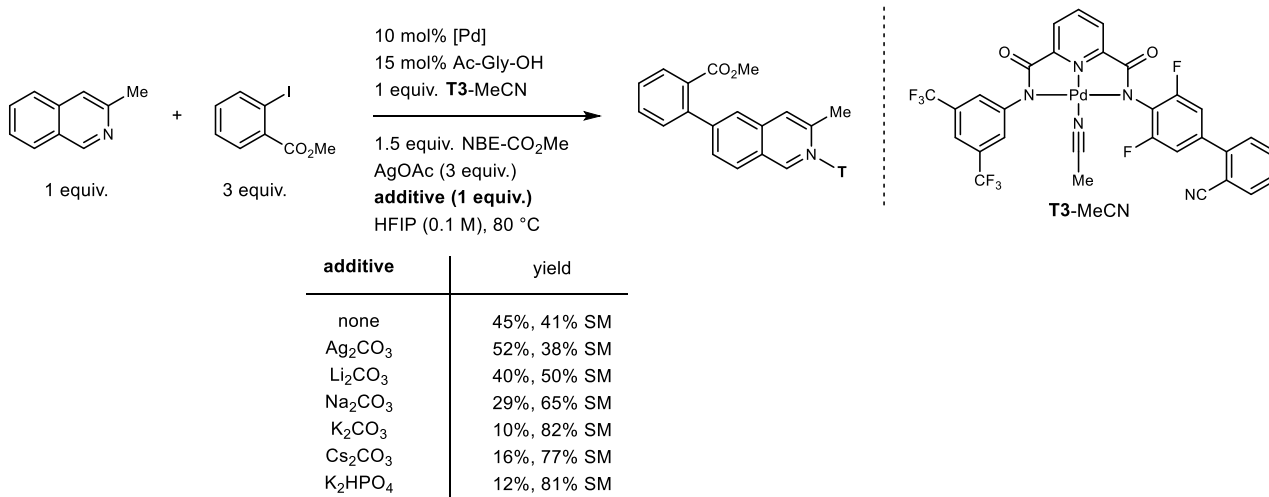

<sup>a</sup>The yields were determined by <sup>1</sup>H-NMR using CHCl<sub>2</sub>CHCl<sub>2</sub> as the standard.

**Table 5. Catalyst loading screening<sup>a</sup>**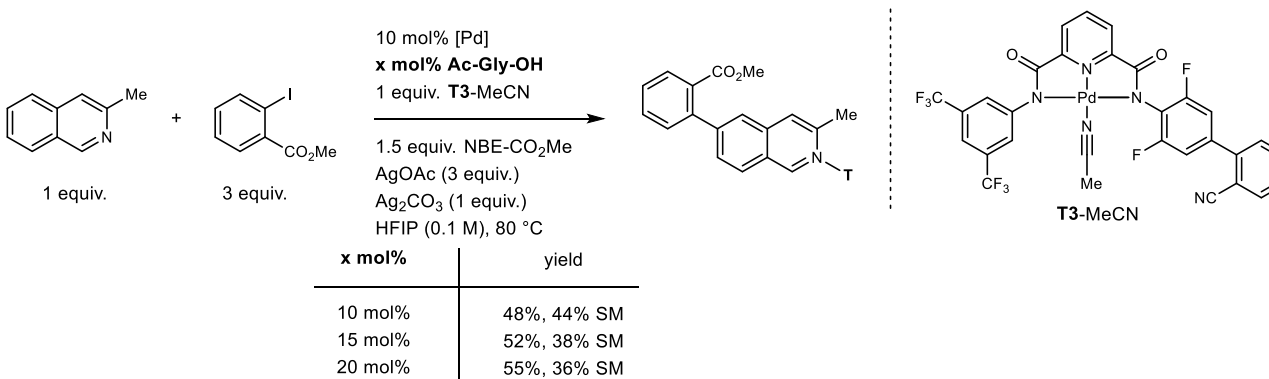

<sup>a</sup>The yields were determined by <sup>1</sup>H-NMR using CHCl<sub>2</sub>CHCl<sub>2</sub> as the standard.

**Table 6. Solvent screening<sup>a</sup>**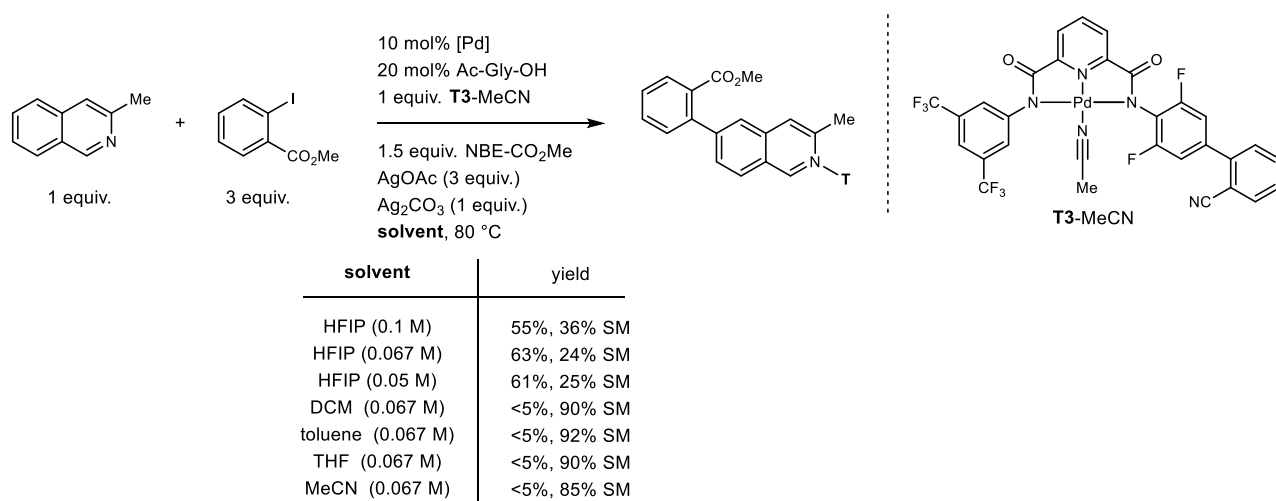

<sup>a</sup>The yields were determined by <sup>1</sup>H-NMR using CHCl<sub>2</sub>CHCl<sub>2</sub> as the standard.

**Table 7. Acid screening<sup>a</sup>**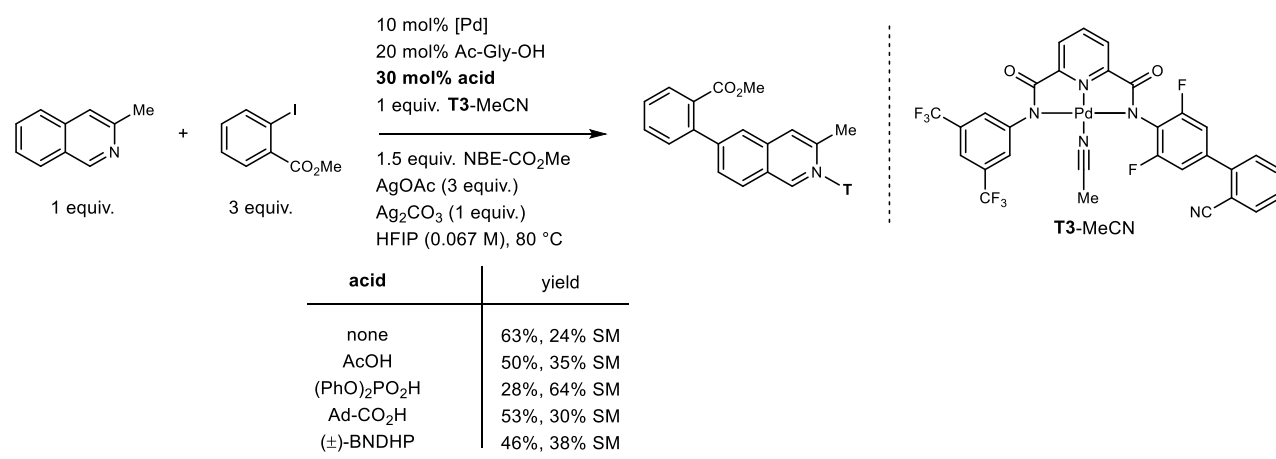

<sup>a</sup>The yields were determined by <sup>1</sup>H-NMR using CHCl<sub>2</sub>CHCl<sub>2</sub> as the standard.

## B. Pd-Catalyzed Remote Arylation of Benzoazines

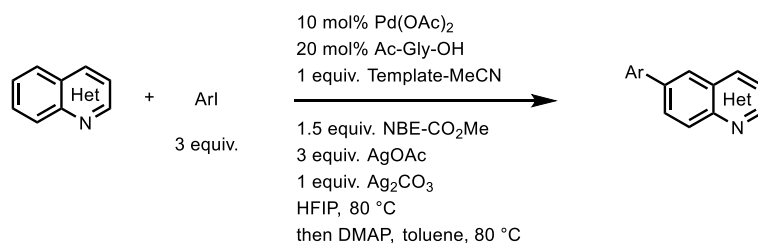

**General procedure A:** A reaction vial (8 mL) was charged with benzoazine (0.10 mmol, 1.0 equiv.), template-MeCN (0.10 mmol, 1.0 equiv.) and 0.2 mL DCM. The mixture was stirred for 5 min at room temperature, and

then concentrated *in vacuo*. Pd(OAc)<sub>2</sub> (2.2 mg, 10 μmol, 10 mol%), Ac-Gly-OH (2.3 mg, 20 μmol, 20 mol%), aryl iodide (0.3 mmol, 3 equiv.), AgOAc (50 mg, 0.30 mmol, 3.0 equiv.), Ag<sub>2</sub>CO<sub>3</sub> (27.6 mg, 0.1 mmol, 1.0 equiv.), NBE-CO<sub>2</sub>Me (22.8 mg, 0.15 mmol, 1.5 equiv.) and HFIP (1.5 ml) were added. The reaction vial was sealed and allowed to stir at 80 °C for 18 h. The reaction mixture was cooled to room temperature. Then a solution of DMAP (36.7 mg, 0.3 mmol, 3 equiv.) in toluene (1.5 mL) was added. The mixture was stirred at 80 °C for 15 min. The reaction mixture was cooled to room temperature, diluted with EtOAc. The mixture was filtered through a short pad of celite and eluted with EtOAc (2 × 2 mL). The filtrate was evaporated under reduced pressure. (If the product release is not complete, a solution of DMAP (18.4 mg, 0.15 mmol, 1.5 equiv.) in toluene (1.5 mL) was added. The solution was stirred at 80 °C for 15 min., and then concentrated.) Purification by preparative TLC afforded the title compound and template-DMAP complex.

**Template recovery:** The template-DMAP complex was dissolved in acetonitrile (3 mL). To this mixture was added methanesulfonic acid (6.5 μl, 0.1 mmol) and the resulting mixture was heated at 60 °C for 2 h. Upon completion, the reaction mixture was cooled to room temperature. The solvent was removed *in vacuo*. Water was added to the reaction mixture and extracted with DCM three times. The organic layer was dried with Na<sub>2</sub>SO<sub>4</sub> and concentrated *in vacuo*. This crude mixture was dissolved in acetonitrile (3 mL). To this mixture was added methanesulfonic acid (3.0 μl, 0.046 mmol) and the resulting mixture was heated at 60 °C for 30 min. Upon completion, the reaction mixture was cooled to room temperature. The solvent was removed *in vacuo*. Water was added to the reaction mixture and extracted with DCM three times. The organic layer was dried with Na<sub>2</sub>SO<sub>4</sub> and concentrated *in vacuo* to give the template.

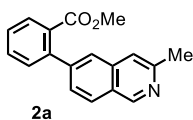

### Methyl 2-(3-methylisoquinolin-6-yl)benzoate (**2a**)

Substrate isoquinoline was arylated following the general procedure by using **T3**-MeCN (73.6 mg, 0.10 mmol, 1.0 equiv.). After purification by preparative TLC (hexanes/EtOAc = 1:1 v/v), compound **2a** (16.9 mg) was obtained in 61% yield as a white solid.

<sup>1</sup>H NMR (600 MHz, CDCl<sub>3</sub>) δ 9.20 (s, 1H), 7.93 (dd, *J* = 7.8, 0.8 Hz, 2H), 7.65 (s, 1H), 7.59 (td, *J* = 7.6, 1.4 Hz, 1H), 7.51–7.41 (m, 4H), 3.60 (s, 3H), 2.71 (s, 3H); <sup>13</sup>C NMR (151 MHz, CDCl<sub>3</sub>) δ 168.58, 152.18, 151.83, 143.78, 142.14, 136.59, 131.71, 130.99, 130.65, 130.31, 127.93, 127.74, 126.96, 125.89, 124.84, 118.70, 52.14, 24.33. HRMS (ESI-TOF) *m/z* calc'd for C<sub>18</sub>H<sub>16</sub>N<sub>1</sub>O<sub>2</sub> [M+H]<sup>+</sup>: 278.1176; found: 278.1182.

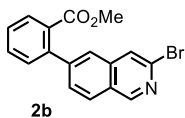

### Methyl 2-(3-bromoisoquinolin-6-yl)benzoate (**2b**)

Substrate isoquinoline was arylated following the general procedure by using **T3**-MeCN (73.6 mg, 0.10 mmol, 1.0 equiv.). After purification by preparative TLC (hexanes/EtOAc = 4:1 v/v), compound **2b** (13 mg) was obtained in 38% yield as a white solid.

<sup>1</sup>H NMR (600 MHz, CDCl<sub>3</sub>) δ 9.06 (s, 1H), 8.00–7.93 (m, 2H), 7.91 (s, 1H), 7.67 (s, 1H), 7.61 (td, *J* = 7.6, 1.4 Hz, 1H), 7.55 (dd, *J* = 8.4, 1.6 Hz, 1H), 7.51 (td, *J* = 7.6, 1.3 Hz, 1H), 7.41 (dd, *J* = 7.6, 0.9 Hz, 1H), 3.63 (s, 3H); <sup>13</sup>C NMR (151 MHz, CDCl<sub>3</sub>) δ 168.13, 152.54, 145.07, 141.69, 137.92, 136.39, 131.93, 131.00, 130.56,

130.34, 129.33, 128.31, 126.99, 126.61, 124.42, 123.91, 52.22. HRMS (ESI-TOF)  $m/z$  calc'd for  $C_{17}H_{13}BrN_1O_2$   $[M+H]^+$ : 342.0124; found: 342.0132.

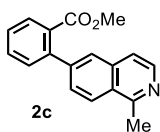

### Methyl 2-(1-methylisoquinolin-6-yl)benzoate (2c)

Substrate isoquinoline was arylated following the general procedure by using **T3**-MeCN (73.6 mg, 0.10 mmol, 1.0 equiv.). After purification by preparative TLC (hexanes/EtOAc = 2:1 v/v), compound **2c** (13.8 mg) was obtained in 50% yield as a yellow oil.

The position of C–H arylation on **2c** was determined by NOESY.

$^1H$  NMR (600 MHz,  $CDCl_3$ )  $\delta$  8.41 (d,  $J = 5.7$  Hz, 1H), 8.13 (d,  $J = 8.6$  Hz, 1H), 7.95 (dd,  $J = 7.8, 1.4$  Hz, 1H), 7.74 (d,  $J = 1.9$  Hz, 1H), 7.60 (td,  $J = 7.6, 1.4$  Hz, 1H), 7.57 – 7.50 (m, 2H), 7.49 (td,  $J = 7.6, 1.3$  Hz, 1H), 7.44 (dd,  $J = 7.6, 1.4$  Hz, 1H), 3.63 (s, 3H), 2.99 (s, 3H);  $^{13}C$  NMR (151 MHz,  $CDCl_3$ )  $\delta$  168.48, 158.60, 143.44, 142.30, 142.02, 135.97, 131.77, 131.08, 130.53, 130.36, 128.40, 127.98, 126.56, 126.08, 125.16, 119.52, 52.18, 22.51. HRMS (ESI-TOF)  $m/z$  calc'd for  $C_{18}H_{16}N_1O_2$   $[M+H]^+$ : 278.1176; found: 278.1184.

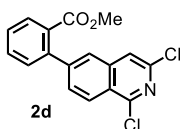

### Methyl 2-(1,3-dichloroisoquinolin-6-yl)benzoate (2d)

Substrate isoquinoline was arylated following the general procedure by using **T3**-MeCN (73.6 mg, 0.10 mmol, 1.0 equiv.). After purification by preparative TLC (hexanes/EtOAc = 9:1 v/v), compound **2d** (13.4 mg) was obtained in 40% yield as a white solid.

$^1H$  NMR (600 MHz,  $CDCl_3$ )  $\delta$  8.30 (d,  $J = 8.7$  Hz, 1H), 8.00 (dd,  $J = 7.8, 1.0$  Hz, 1H), 7.69 (d,  $J = 1.7$  Hz, 1H), 7.67 (s, 1H), 7.64–7.58 (m, 2H), 7.53 (td,  $J = 7.6, 1.3$  Hz, 1H), 7.40 (dd,  $J = 7.6, 1.4$  Hz, 1H), 3.65 (s, 3H);  $^{13}C$  NMR (151 MHz,  $CDCl_3$ )  $\delta$  167.89, 150.97, 146.07, 143.58, 141.27, 139.32, 132.05, 130.97, 130.69, 130.30, 130.17, 128.53, 125.93, 125.01, 124.82, 119.93, 52.28. HRMS (ESI-TOF)  $m/z$  calc'd for  $C_{17}H_{12}Cl_2N_1O_2$   $[M+H]^+$ : 332.0240; found: 332.0247.

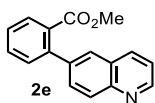

### Methyl 2-(quinolin-6-yl)benzoate (2e)

Substrate quinoline was arylated following the general procedure by using **T1**-MeCN (67.0 mg, 0.10 mmol, 1.0 equiv.). After purification by preparative TLC (hexanes/EtOAc = 2:1 v/v), compound **2e** (18.7 mg) was obtained in 71% yield as a yellow oil.

$^1H$  NMR (600 MHz,  $CDCl_3$ )  $\delta$  8.93 (dd,  $J = 4.3, 1.7$  Hz, 1H), 8.21–8.15 (m, 2H), 8.12 (d,  $J = 8.6$  Hz, 1H), 7.93 (dd,  $J = 7.8, 1.5$  Hz, 1H), 7.76 (d,  $J = 2.1$  Hz, 1H), 7.67 (dd,  $J = 8.6, 2.1$  Hz, 1H), 7.59 (td,  $J = 7.5, 1.5$  Hz, 1H), 7.51–7.39 (m, 2H), 3.61 (s, 3H);  $^{13}C$  NMR (151 MHz,  $CDCl_3$ )  $\delta$  168.83, 150.56, 147.61, 141.98, 140.04, 136.35, 131.70, 131.21, 130.90, 130.83, 130.33, 128.93, 128.20, 127.81, 126.69, 121.58, 52.18. HRMS (ESI-TOF)  $m/z$  calc'd for  $C_{17}H_{14}N_1O_2$   $[M+H]^+$ : 264.1019; found: 264.1029.

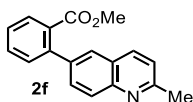

### Methyl 2-(2-methylquinolin-6-yl)benzoate (2f)

Substrate quinoline was arylated following the general procedure by using **T2**-MeCN (73.2 mg, 0.10 mmol, 1.0 equiv.). After purification by preparative TLC (hexanes/EtOAc = 2:1 v/v), compound **2f** (19.4 mg) was obtained in 70% yield as a colorless oil.

<sup>1</sup>H NMR (600 MHz, CDCl<sub>3</sub>) δ 8.06 (d, *J* = 8.4 Hz, 1H), 8.02 (d, *J* = 8.7 Hz, 1H), 7.89 (dd, *J* = 8.1, 1.5 Hz, 1H), 7.71 (d, *J* = 2.1 Hz, 1H), 7.62 (dd, *J* = 8.7, 2.1 Hz, 1H), 7.57 (td, *J* = 7.4, 1.4 Hz, 1H), 7.50–7.41 (m, 2H), 7.31 (d, *J* = 8.5 Hz, 1H), 3.58 (s, 3H), 2.77 (s, 3H); <sup>13</sup>C NMR (151 MHz, CDCl<sub>3</sub>) δ 169.04, 159.23, 147.20, 141.96, 139.01, 136.38, 131.56, 131.10, 130.95, 130.69, 130.18, 128.17, 127.61, 126.44, 126.34, 122.46, 52.10, 25.50. HRMS (ESI-TOF) *m/z* calc'd for C<sub>18</sub>H<sub>16</sub>N<sub>1</sub>O<sub>2</sub> [M+H]<sup>+</sup>: 278.1176; found: 278.1185.

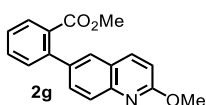

### Methyl 2-(2-methoxyquinolin-6-yl)benzoate (2g)

Substrate quinoline was arylated following the general procedure by using **T2**-MeCN (73.2 mg, 0.10 mmol, 1.0 equiv.). After purification by preparative TLC (hexanes/EtOAc = 4:1 v/v), compound **2g** (17.9 mg) was obtained in 61% yield as a colorless oil.

<sup>1</sup>H NMR (600 MHz, CDCl<sub>3</sub>) δ 7.99 (d, *J* = 8.7 Hz, 1H), 7.89–7.83 (m, 2H), 7.67 (d, *J* = 2.2 Hz, 1H), 7.60–7.52 (m, 2H), 7.47–7.41 (m, 2H), 6.93 (d, *J* = 8.7 Hz, 1H), 4.10 (s, 3H), 3.60 (s, 3H); <sup>13</sup>C NMR (151 MHz, CDCl<sub>3</sub>) δ 169.23, 162.70, 145.95, 142.05, 138.85, 137.25, 131.48, 131.08, 131.02, 130.54, 130.08, 127.40, 126.84, 126.55, 124.91, 113.51, 53.55, 52.09. HRMS (ESI-TOF) *m/z* calc'd for C<sub>18</sub>H<sub>16</sub>N<sub>1</sub>O<sub>3</sub> [M+H]<sup>+</sup>: 294.1135; found: 294.1136.

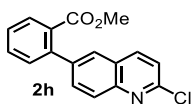

### Methyl 2-(2-chloroquinolin-6-yl)benzoate (2h)

Substrate quinoline was arylated following the general procedure by using **T2**-MeCN (73.2 mg, 0.10 mmol, 1.0 equiv.). After purification by preparative TLC (DCM/Et<sub>2</sub>O = 30:1 v/v), compound **2h** (18.7 mg) was obtained in 62% yield as a white solid.

<sup>1</sup>H NMR (600 MHz, CDCl<sub>3</sub>) δ 8.12 (d, *J* = 8.5 Hz, 1H), 8.03 (d, *J* = 8.6 Hz, 1H), 7.94 (dd, *J* = 7.8, 1.3 Hz, 1H), 7.75 (d, *J* = 2.0 Hz, 1H), 7.68 (dd, *J* = 8.6, 2.0 Hz, 1H), 7.59 (td, *J* = 7.5, 1.4 Hz, 1H), 7.49 (td, *J* = 7.6, 1.3 Hz, 1H), 7.46–7.38 (m, 2H), 3.61 (s, 3H); <sup>13</sup>C NMR (151 MHz, CDCl<sub>3</sub>) δ 168.56, 150.80, 147.19, 141.64, 140.54, 139.04, 131.94, 131.75, 131.11, 130.65, 130.40, 128.03, 127.96, 126.70, 126.44, 122.79, 52.15. HRMS (ESI-TOF) *m/z* calc'd for C<sub>17</sub>H<sub>13</sub>ClN<sub>1</sub>O<sub>2</sub> [M+H]<sup>+</sup>: 298.0629; found: 298.0639.

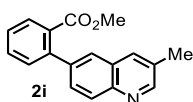

### Methyl 2-(3-methylquinolin-6-yl)benzoate (2i)

Substrate quinoline was arylated following the general procedure by using **T1**-MeCN (67.0 mg, 0.10 mmol, 1.0 equiv.). After purification by preparative TLC (hexanes/EtOAc = 2:1 v/v), compound **2i** (23.8 mg) was obtained in 86% yield as a yellow oil.

<sup>1</sup>H NMR (600 MHz, CDCl<sub>3</sub>) δ 8.78 (d, *J* = 2.3 Hz, 1H), 8.07 (d, *J* = 8.6 Hz, 1H), 7.96–7.84 (m, 2H), 7.67 (d, *J* = 2.1 Hz, 1H), 7.61–7.54 (m, 2H), 7.49–7.42 (m, 2H), 3.59 (s, 3H), 2.53 (s, 3H); <sup>13</sup>C NMR (151 MHz, CDCl<sub>3</sub>) δ 168.91, 152.52, 145.84, 142.04, 139.90, 134.89, 131.57, 131.09, 130.96, 130.87, 130.18, 129.77, 128.64, 127.99, 127.65, 126.06, 52.10, 18.88. HRMS (ESI-TOF) *m/z* calc'd for C<sub>18</sub>H<sub>16</sub>N<sub>1</sub>O<sub>2</sub> [M+H]<sup>+</sup>: 278.1176; found: 278.1184.

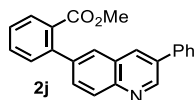

### Methyl 2-(3-phenylquinolin-6-yl)benzoate (2j)

Substrate quinoline was arylated following the general procedure by using **T1**-MeCN (67.0 mg, 0.10 mmol, 1.0 equiv.). After purification by preparative TLC (hexanes/EtOAc = 4:1 v/v), compound **2j** (23.1 mg) was obtained in 68% yield as a colorless oil.

<sup>1</sup>H NMR (600 MHz, CDCl<sub>3</sub>) δ 9.20 (d, *J* = 2.3 Hz, 1H), 8.32 (d, *J* = 2.3 Hz, 1H), 8.15 (d, *J* = 8.6 Hz, 1H), 7.94 (dd, *J* = 8.1, 1.3 Hz, 1H), 7.83 (d, *J* = 2.1 Hz, 1H), 7.73 (dd, *J* = 8.3, 1.2 Hz, 2H), 7.67 (dd, *J* = 8.6, 2.1 Hz, 1H), 7.62–7.58 (m, 1H), 7.54 (t, *J* = 7.6 Hz, 2H), 7.51–7.42 (m, 3H), 3.63 (s, 3H); <sup>13</sup>C NMR (151 MHz, CDCl<sub>3</sub>) δ 168.78, 150.10, 146.68, 141.98, 140.46, 137.99, 134.34, 133.42, 131.69, 131.15, 130.78, 130.31, 129.31, 128.73, 128.26, 127.92, 127.81, 127.55, 126.86, 52.17. HRMS (ESI-TOF) *m/z* calc'd for C<sub>23</sub>H<sub>18</sub>N<sub>1</sub>O<sub>2</sub> [M+H]<sup>+</sup>: 340.1332; found: 340.1336.

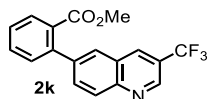

### Methyl 2-(3-(trifluoromethyl)quinolin-6-yl)benzoate (2k)

Substrate quinoline was arylated following the general procedure by using **T1**-MeCN (67.0 mg, 0.10 mmol, 1.0 equiv.). After purification by preparative TLC (hexanes/EtOAc = 2:1 v/v), compound **2k** (18.2 mg) was obtained in 55% yield as a colorless oil.

<sup>1</sup>H NMR (600 MHz, CDCl<sub>3</sub>) δ 9.11 (d, *J* = 2.7 Hz, 1H), 8.46 (s, 1H), 8.20 (d, *J* = 8.7 Hz, 1H), 7.98 (dd, *J* = 7.8, 1.2 Hz, 1H), 7.86 (d, *J* = 1.9 Hz, 1H), 7.80 (dd, *J* = 8.7, 2.0 Hz, 1H), 7.62 (td, *J* = 7.6, 1.4 Hz, 1H), 7.51 (td, *J* = 7.6, 1.3 Hz, 1H), 7.44 (dd, *J* = 7.6, 1.0 Hz, 1H), 3.64 (s, 3H); <sup>13</sup>C NMR (151 MHz, CDCl<sub>3</sub>) δ 168.25, 148.68, 146.12 (q, *J* = 3.1 Hz), 141.71, 141.50, 134.11 (q, *J* = 4.1 Hz), 133.31, 131.92, 131.18, 130.58, 130.43, 128.97, 128.19, 127.30, 126.18, 124.05 (q, *J* = 33.0 Hz), 123.79 (q, *J* = 272.3 Hz), 52.21; <sup>19</sup>F NMR (376 MHz, CDCl<sub>3</sub>) δ -62.09. HRMS (ESI-TOF) *m/z* calc'd for C<sub>18</sub>H<sub>13</sub>F<sub>3</sub>N<sub>1</sub>O<sub>2</sub> [M+H]<sup>+</sup>: 332.0893; found: 332.0903.

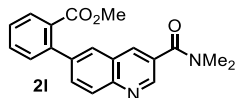

### Methyl 2-(3-(dimethylcarbamoyl)quinolin-6-yl)benzoate (2l)

Substrate quinoline was arylated following the general procedure by using **T1**-MeCN (67.0 mg, 0.10 mmol, 1.0 equiv.). After purification by preparative TLC (EtOAc), compound **2l** (13.2 mg) was obtained in 40% yield as a colorless oil.

<sup>1</sup>H NMR (600 MHz, CDCl<sub>3</sub>) δ 8.98 (d, *J* = 2.2 Hz, 1H), 8.26 (d, *J* = 2.1 Hz, 1H), 8.13 (d, *J* = 8.6 Hz, 1H), 7.95 (dd, *J* = 7.8, 1.3 Hz, 1H), 7.79 (d, *J* = 1.9 Hz, 1H), 7.71 (dd, *J* = 8.6, 2.1 Hz, 1H), 7.60 (td, *J* = 7.5, 1.4 Hz, 1H), 7.49 (td, *J* = 7.6, 1.3 Hz, 1H), 7.44 (dd, *J* = 7.6, 0.9 Hz, 1H), 3.62 (s, 3H), 3.19 (s, 3H), 3.10 (s, 3H); <sup>13</sup>C NMR (151 MHz, CDCl<sub>3</sub>) δ 169.19, 168.50, 148.63, 147.55, 141.71, 141.00, 135.22, 132.10, 131.80, 131.18, 130.58,



130.42, 129.66, 128.81, 127.98, 126.99, 126.93, 52.19, 39.79, 35.69. HRMS (ESI-TOF)  $m/z$  calc'd for  $C_{20}H_{19}N_2O_3$   $[M+H]^+$ : 335.1390; found: 335.1398.

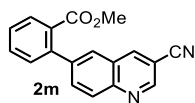

#### Methyl 2-(3-cyanoquinolin-6-yl)benzoate (2m)

Substrate quinoline was arylated following the general procedure by using **T1**-MeCN (67.0 mg, 0.10 mmol, 1.0 equiv.). After purification by preparative TLC (hexanes/EtOAc = 2:1 v/v), compound **2m** (10.7 mg) was obtained in 37% yield as a white solid.

$^1H$  NMR (600 MHz,  $CDCl_3$ )  $\delta$  9.06 (d,  $J = 2.1$  Hz, 1H), 8.55 (d,  $J = 2.4$  Hz, 1H), 8.18 (d,  $J = 8.5$  Hz, 1H), 8.00 (dd,  $J = 7.8, 1.4$  Hz, 1H), 7.84–7.82 (m, 2H), 7.62 (td,  $J = 7.4, 1.4$  Hz, 1H), 7.52 (td,  $J = 7.6, 1.3$  Hz, 1H), 7.42 (dd,  $J = 7.6, 1.2$  Hz, 1H), 3.65 (s, 3H);  $^{13}C$  NMR (151 MHz,  $CDCl_3$ )  $\delta$  168.02, 149.82, 148.15, 142.32, 141.54, 141.29, 134.37, 132.04, 131.20, 130.70, 130.24, 129.12, 128.38, 126.85, 126.14, 117.24, 106.98, 52.25. HRMS (ESI-TOF)  $m/z$  calc'd for  $C_{18}H_{13}N_2O_2$   $[M+H]^+$ : 289.0972; found: 289.0980.

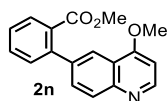

#### Methyl 2-(4-methoxyquinolin-6-yl)benzoate (2n)

Substrate quinoline was arylated following the general procedure by using **T1**-MeCN (67.0 mg, 0.10 mmol, 1.0 equiv.), 20 mol%  $Pd(OAc)_2$ , and 40 mol% Ac-Gly-OH. After purification by preparative TLC (hexanes/EtOAc = 1:2 v/v), compound **2n** (10.5 mg) was obtained in 36% yield as a yellow oil.

$^1H$  NMR (600 MHz,  $CDCl_3$ )  $\delta$  8.76 (d,  $J = 5.1$  Hz, 1H), 8.16 (d,  $J = 2.0$  Hz, 1H), 8.04 (d,  $J = 8.6$  Hz, 1H), 7.91 (dd,  $J = 7.5, 1.0$  Hz, 1H), 7.63 (dd,  $J = 8.6, 2.1$  Hz, 1H), 7.57 (td,  $J = 7.6, 1.4$  Hz, 1H), 7.49–7.42 (m, 2H), 6.77 (d,  $J = 5.3$  Hz, 1H), 4.04 (s, 3H), 3.60 (s, 3H);  $^{13}C$  NMR (151 MHz,  $CDCl_3$ )  $\delta$  168.94, 162.59, 151.44, 148.36, 142.27, 139.02, 131.58, 131.25, 131.00, 130.83, 130.21, 128.32, 127.60, 121.23, 120.94, 100.48, 55.82, 52.09. HRMS (ESI-TOF)  $m/z$  calc'd for  $C_{18}H_{16}N_1O_3$   $[M+H]^+$ : 294.1125; found: 294.1131.

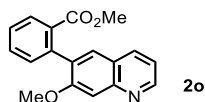

#### Methyl 2-(7-methoxyquinolin-6-yl)benzoate (2o)

Substrate quinoline was arylated following the general procedure by using **T1**-MeCN (67.0 mg, 0.10 mmol, 1.0 equiv.). After purification by preparative TLC (hexanes/EtOAc = 1:1 v/v), compound **2o** (17.5 mg) was obtained in 60% yield as a yellow oil.

$^1H$  NMR (600 MHz,  $CDCl_3$ )  $\delta$  8.83 (dd,  $J = 4.4, 1.8$  Hz, 1H), 8.10 (dd,  $J = 8.1, 1.7$  Hz, 1H), 7.95 (dd,  $J = 7.8, 1.1$  Hz, 1H), 7.66 (s, 1H), 7.60 (td,  $J = 7.5, 1.4$  Hz, 1H), 7.47 (td,  $J = 7.6, 1.3$  Hz, 1H), 7.45 (s, 1H), 7.40 (dd,  $J = 7.6, 1.0$  Hz, 1H), 7.29 (dd,  $J = 8.1, 4.4$  Hz, 1H), 3.86 (s, 3H), 3.62 (s, 3H);  $^{13}C$  NMR (151 MHz,  $CDCl_3$ )  $\delta$  168.32, 158.10, 150.42, 149.68, 138.02, 135.84, 133.77, 131.99, 131.70, 131.55, 129.70, 128.06, 127.90, 123.69, 119.35, 106.53, 55.66, 51.87. HRMS (ESI-TOF)  $m/z$  calc'd for  $C_{18}H_{16}N_1O_3$   $[M+H]^+$ : 294.1125; found: 294.1133.

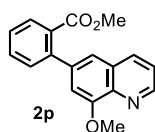

### Methyl 2-(8-methoxyquinolin-6-yl)benzoate (2p)

Substrate quinoline was arylated following the general procedure by using **T1**-MeCN (67.0 mg, 0.10 mmol, 1.0 equiv.). After purification by preparative TLC (hexanes/EtOAc = 1:1 v/v), compound **2p** (23.8 mg) was obtained in 81% yield as a yellow oil.

$^1\text{H}$  NMR (600 MHz,  $\text{CDCl}_3$ )  $\delta$  8.93 (dd,  $J = 4.2, 1.7$  Hz, 1H), 8.13 (dd,  $J = 8.3, 1.7$  Hz, 1H), 7.87 (dd,  $J = 7.8, 1.0$  Hz, 1H), 7.57 (td,  $J = 7.6, 1.4$  Hz, 1H), 7.50–7.41 (m, 3H), 7.33 (d,  $J = 1.7$  Hz, 1H), 7.00 (d,  $J = 1.8$  Hz, 1H), 4.07 (s, 3H), 3.59 (s, 3H);  $^{13}\text{C}$  NMR (151 MHz,  $\text{CDCl}_3$ )  $\delta$  169.09, 154.90, 149.36, 141.97, 140.15, 139.54, 136.11, 131.47, 131.12, 130.86, 129.97, 129.13, 127.75, 122.14, 118.61, 109.13, 56.16, 52.17. HRMS (ESI-TOF)  $m/z$  calc'd for  $\text{C}_{18}\text{H}_{16}\text{N}_1\text{O}_3$   $[\text{M}+\text{H}]^+$ : 294.1125; found: 294.1131.

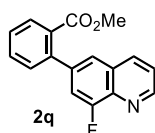

### Methyl 2-(8-fluoroquinolin-6-yl)benzoate (2q)

Substrate quinoline was arylated following the general procedure by using **T1**-MeCN (67.0 mg, 0.10 mmol, 1.0 equiv.). After purification by preparative TLC (hexanes/EtOAc = 4:1 v/v), compound **2q** (19 mg) was obtained in 68% yield as a colorless oil.

$^1\text{H}$  NMR (600 MHz,  $\text{CDCl}_3$ )  $\delta$  8.98 (dd,  $J = 4.2, 1.7$  Hz, 1H), 8.19 (d,  $J = 8.6$  Hz, 1H), 7.94 (dd,  $J = 7.8, 1.4$  Hz, 1H), 7.59 (td,  $J = 7.6, 1.4$  Hz, 1H), 7.55 (d,  $J = 1.5$  Hz, 1H), 7.51–7.46 (m, 2H), 7.43 (dd,  $J = 7.6, 1.2$  Hz, 1H), 7.40 (dd,  $J = 11.0, 1.8$  Hz, 1H), 3.64 (s, 3H);  $^{13}\text{C}$  NMR (151 MHz,  $\text{CDCl}_3$ )  $\delta$  168.37, 157.37 (d,  $J = 256.9$  Hz), 150.62 (d,  $J = 1.7$  Hz), 141.08 (d,  $J = 1.7$  Hz), 140.28 (d,  $J = 8.3$  Hz), 137.81 (d,  $J = 12.1$  Hz), 135.99 (d,  $J = 3.3$  Hz), 131.78, 131.05, 130.60, 130.40, 129.59 (d,  $J = 2.8$  Hz), 128.14, 122.50, 122.35 (d,  $J = 3.9$  Hz), 115.08 (d,  $J = 19.8$  Hz), 52.25;  $^{19}\text{F}$  NMR (376 MHz,  $\text{CDCl}_3$ )  $\delta$  -126.65. HRMS (ESI-TOF)  $m/z$  calc'd for  $\text{C}_{17}\text{H}_{13}\text{F}_1\text{N}_1\text{O}_2$   $[\text{M}+\text{H}]^+$ : 282.0925; found: 282.0933.

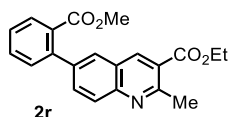

### Ethyl 6-(2-(methoxycarbonyl)phenyl)-2-methylquinoline-3-carboxylate (2r)

Substrate quinoline was arylated following the general procedure by using **T2**-MeCN (73.2 mg, 0.10 mmol, 1.0 equiv.). After purification by preparative TLC (hexanes/EtOAc = 4:1 v/v), compound **2r** (19.9 mg) was obtained in 57% yield as a white solid.

$^1\text{H}$  NMR (600 MHz,  $\text{CDCl}_3$ )  $\delta$  8.74 (s, 1H), 8.04 (d,  $J = 8.7$  Hz, 1H), 7.93 (dd,  $J = 7.8, 1.4$  Hz, 1H), 7.80 (d,  $J = 2.1$  Hz, 1H), 7.72 (dd,  $J = 8.6, 2.1$  Hz, 1H), 7.59 (td,  $J = 7.6, 1.4$  Hz, 1H), 7.48 (td,  $J = 7.7, 1.4$  Hz, 1H), 7.45 (dd,  $J = 7.6, 0.8$  Hz, 1H), 4.45 (q,  $J = 7.2$  Hz, 2H), 3.59 (s, 3H), 3.01 (s, 3H), 1.45 (t,  $J = 7.1$  Hz, 3H);  $^{13}\text{C}$  NMR (151 MHz,  $\text{CDCl}_3$ )  $\delta$  168.73, 166.65, 158.67, 147.93, 141.62, 140.03, 139.98, 133.01, 131.71, 131.09, 130.76, 130.37, 128.01, 127.88, 127.25, 125.65, 124.41, 61.53, 52.14, 25.80, 14.44. HRMS (ESI-TOF)  $m/z$  calc'd for  $\text{C}_{21}\text{H}_{20}\text{N}_1\text{O}_4$   $[\text{M}+\text{H}]^+$ : 350.1387; found: 350.1396.

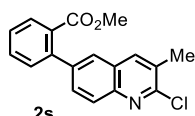

### Methyl 2-(2-chloro-3-methylquinolin-6-yl)benzoate (2s)

Substrate quinoline was arylated following the general procedure by using **T2**-MeCN (73.2 mg, 0.10 mmol, 1.0 equiv.). After purification by preparative TLC (hexanes/EtOAc = 4:1 v/v), compound **2s** (19.5 mg) was obtained in 63% yield as a white solid.

<sup>1</sup>H NMR (600 MHz, CDCl<sub>3</sub>) δ 8.02–7.95 (m, 2H), 7.91 (dd, *J* = 7.8, 1.4 Hz, 1H), 7.68 (d, *J* = 2.1 Hz, 1H), 7.62–7.55 (m, 2H), 7.47 (td, *J* = 7.6, 1.3 Hz, 1H), 7.43 (dd, *J* = 7.6, 1.2 Hz, 1H), 3.59 (s, 3H), 2.55 (d, *J* = 1.0 Hz, 3H); <sup>13</sup>C NMR (151 MHz, CDCl<sub>3</sub>) δ 168.71, 152.12, 145.76, 141.77, 140.37, 137.96, 131.67, 131.04, 130.83, 130.77, 130.69, 130.30, 127.83, 127.69, 127.45, 125.70, 52.12, 20.23. HRMS (ESI-TOF) *m/z* calc'd for C<sub>18</sub>H<sub>15</sub>ClN<sub>1</sub>O<sub>2</sub> [M+H]<sup>+</sup>: 312.0786; found: 312.0796.

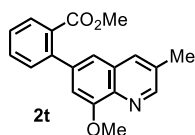

### Methyl 2-(8-methoxy-3-methylquinolin-6-yl)benzoate (**2t**)

Substrate quinoline was arylated following the general procedure by using **T1**-MeCN (67.0 mg, 0.10 mmol, 1.0 equiv.). After purification by preparative TLC (hexanes/EtOAc = 1:1 v/v), compound **2t** (25.3 mg) was obtained in 82% yield as a yellow oil.

<sup>1</sup>H NMR (600 MHz, CDCl<sub>3</sub>) δ 8.77 (dd, *J* = 2.2, 0.5 Hz, 1H), 7.89–7.85 (m, 1H), 7.85 (ddd, *J* = 7.7, 1.4, 0.6 Hz, 1H), 7.56 (td, *J* = 7.6, 1.5 Hz, 1H), 7.49–7.42 (m, 2H), 7.24 (d, *J* = 1.7 Hz, 1H), 6.93 (d, *J* = 1.7 Hz, 1H), 4.06 (s, 3H), 3.57 (s, 3H), 2.51 (s, 3H); <sup>13</sup>C NMR (151 MHz, CDCl<sub>3</sub>) δ 169.20, 154.94, 151.21, 142.07, 140.10, 137.79, 134.84, 131.64, 131.39, 131.20, 130.78, 129.88, 129.04, 127.64, 118.10, 108.19, 56.08, 52.15, 18.78. HRMS (ESI-TOF) *m/z* calc'd for C<sub>19</sub>H<sub>18</sub>N<sub>1</sub>O<sub>3</sub> [M+H]<sup>+</sup>: 308.1281; found: 308.1293.

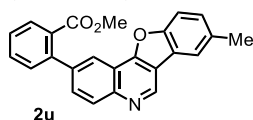

### Methyl 2-(8-methylbenzofuro[3,2-c]quinolin-2-yl)benzoate (**2u**)

Substrate quinoline was arylated following the general procedure by using **T1**-MeCN (67.0 mg, 0.10 mmol, 1.0 equiv.), 20 mol% Pd(OAc)<sub>2</sub>, and 40 mol% Ac-Gly-OH. After purification by preparative TLC (hexanes/EtOAc = 2:1 v/v), compound **2u** (27.8 mg) was obtained in 76% yield as a white solid.

<sup>1</sup>H NMR (600 MHz, CDCl<sub>3</sub>) δ 9.47 (s, 1H), 8.35 (d, *J* = 2.1 Hz, 1H), 8.26 (d, *J* = 8.6 Hz, 1H), 7.96 (d, *J* = 7.7 Hz, 1H), 7.90 (s, 1H), 7.71 (dd, *J* = 8.6, 2.1 Hz, 1H), 7.66–7.57 (m, 2H), 7.54 (dd, *J* = 7.6, 1.5 Hz, 1H), 7.50 (td, *J* = 7.5, 1.4 Hz, 1H), 7.34 (dd, *J* = 8.4, 1.9 Hz, 1H), 3.63 (s, 3H), 2.56 (s, 3H); <sup>13</sup>C NMR (151 MHz, CDCl<sub>3</sub>) δ 168.73, 157.87, 154.49, 146.58, 144.48, 141.98, 140.42, 133.90, 131.71, 131.28, 130.76, 130.47, 130.37, 129.31, 128.51, 127.87, 122.78, 120.69, 119.81, 117.13, 116.75, 111.70, 52.16, 21.54. HRMS (ESI-TOF) *m/z* calc'd for C<sub>24</sub>H<sub>18</sub>N<sub>1</sub>O<sub>3</sub> [M+H]<sup>+</sup>: 368.1281; found: 368.1288.

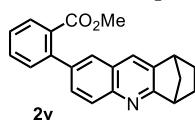

### Methyl 2-(1,2,3,4-tetrahydro-1,4-methanoacridin-7-yl)benzoate (**2v**)

Substrate quinoline was arylated following the general procedure by using **T2**-MeCN (73.2 mg, 0.10 mmol, 1.0 equiv.). After purification by preparative TLC (hexanes/EtOAc = 3:1 v/v), compound **2v** (18.1 mg) was obtained in 55% yield as a colorless oil.

$^1\text{H}$  NMR (600 MHz,  $\text{CDCl}_3$ )  $\delta$  8.01 (d,  $J = 8.6$  Hz, 1H), 7.88 (dd,  $J = 8.1, 1.4$  Hz, 1H), 7.74 (s, 1H), 7.66 (d,  $J = 2.2$  Hz, 1H), 7.60–7.52 (m, 2H), 7.49–7.41 (m, 2H), 3.60 (s, 3H), 3.55 (s, 2H), 2.14–2.02 (m, 2H), 1.96 (dt,  $J = 9.3, 1.8$  Hz, 1H), 1.75 (dt,  $J = 9.3, 1.4$  Hz, 1H), 1.50–1.44 (m, 1H), 1.39–1.32 (m, 1H);  $^{13}\text{C}$  NMR (151 MHz,  $\text{CDCl}_3$ )  $\delta$  170.79, 169.10, 146.01, 142.23, 140.47, 138.64, 131.48, 131.14, 130.97, 130.07, 129.07, 128.25, 127.64, 127.44, 126.75, 125.85, 52.13, 46.87, 45.53, 42.31, 27.56, 25.82. HRMS (ESI-TOF)  $m/z$  calc'd for  $\text{C}_{22}\text{H}_{20}\text{N}_1\text{O}_2$   $[\text{M}+\text{H}]^+$ : 330.1489; found: 330.1496.

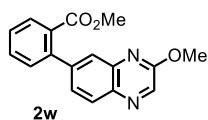

### Methyl 2-(3-methoxyquinoxalin-6-yl)benzoate (2w)

Substrate quinoxaline was arylated following the general procedure by using **T1**-MeCN (67.0 mg, 0.10 mmol, 1.0 equiv.). After purification by preparative TLC (hexanes/EtOAc = 4:1 v/v), compound **2w** (12.6 mg) was obtained in 43% yield as a white solid.

$^1\text{H}$  NMR (600 MHz, Chloroform-*d*)  $\delta$  8.48 (s, 1H), 8.01 (d,  $J = 8.5$  Hz, 1H), 7.93 (dd,  $J = 7.7, 1.3$  Hz, 1H), 7.82 (dd,  $J = 2.1, 0.6$  Hz, 1H), 7.59 (td,  $J = 7.5, 1.4$  Hz, 1H), 7.52–7.44 (m, 3H), 4.10 (s, 3H), 3.63 (s, 3H);  $^{13}\text{C}$  NMR (151 MHz,  $\text{CDCl}_3$ )  $\delta$  168.67, 158.14, 143.74, 141.87, 140.31, 139.61, 138.10, 131.67, 131.09, 130.65, 130.32, 128.33, 127.88, 127.78, 126.34, 53.86, 52.15. HRMS (ESI-TOF)  $m/z$  calc'd for  $\text{C}_{17}\text{H}_{15}\text{N}_2\text{O}_3$   $[\text{M}+\text{H}]^+$ : 295.1077; found: 295.1083.

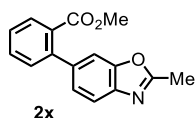

### Methyl 2-(2-methylbenzo[d]oxazol-6-yl)benzoate (2x)

Substrate benzo[d]oxazole was arylated following the general procedure by using **T1**-MeCN (67.0 mg, 0.10 mmol, 1.0 equiv.). After purification by preparative TLC (hexanes/EtOAc = 2:1 v/v), compound **2x** (14.9 mg) was obtained in 56% yield as a colorless oil.

$^1\text{H}$  NMR (600 MHz,  $\text{CDCl}_3$ )  $\delta$  7.85 (dd,  $J = 7.8, 1.0$  Hz, 1H), 7.65 (d,  $J = 8.1$  Hz, 1H), 7.54 (td,  $J = 7.6, 1.4$  Hz, 1H), 7.45–7.41 (m, 2H), 7.40 (dd,  $J = 7.7, 0.9$  Hz, 1H), 7.24 (dd,  $J = 8.1, 1.7$  Hz, 1H), 3.63 (s, 3H), 2.66 (s, 3H);  $^{13}\text{C}$  NMR (151 MHz,  $\text{CDCl}_3$ )  $\delta$  169.00, 164.36, 151.00, 142.15, 140.87, 138.29, 131.43, 131.13, 131.07, 130.02, 127.48, 125.01, 118.82, 110.18, 52.13, 14.72. HRMS (ESI-TOF)  $m/z$  calc'd for  $\text{C}_{16}\text{H}_{14}\text{N}_1\text{O}_3$   $[\text{M}+\text{H}]^+$ : 268.0968; found: 268.0976.

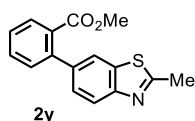

### Methyl 2-(2-methylbenzo[d]thiazol-6-yl)benzoate (2y)

Substrate benzo[d]thiazole was arylated following the general procedure by using **T1**-MeCN (67.0 mg, 0.10 mmol, 1.0 equiv.). After purification by preparative TLC (hexanes/EtOAc = 4:1 v/v), compound **2y** (11.6 mg) was obtained in 41% yield as a colorless oil.

$^1\text{H}$  NMR (600 MHz,  $\text{CDCl}_3$ )  $\delta$  7.95 (d,  $J = 8.3$  Hz, 1H), 7.86 (ddd,  $J = 7.8, 1.4, 0.4$  Hz, 1H), 7.77 (dd,  $J = 1.8, 0.6$  Hz, 1H), 7.55 (td,  $J = 7.4, 1.4$  Hz, 1H), 7.46–7.39 (m, 2H), 7.37 (dd,  $J = 8.3, 1.8$  Hz, 1H), 3.61 (s, 3H), 2.86 (s, 3H);  $^{13}\text{C}$  NMR (151 MHz,  $\text{CDCl}_3$ )  $\delta$  169.05, 167.36, 152.66, 141.97, 138.29, 135.78, 131.45, 131.06, 131.04, 130.06, 127.52, 126.96, 121.81, 120.95, 52.14, 20.29. HRMS (ESI-TOF)  $m/z$  calc'd for  $\text{C}_{16}\text{H}_{14}\text{N}_1\text{O}_2\text{S}_1$   $[\text{M}+\text{H}]^+$ : 284.0740; found: 284.0750.

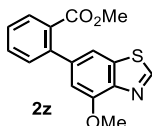

### Methyl 2-(4-methoxybenzo[d]thiazol-6-yl)benzoate (**2z**)

Substrate benzo[d]thiazole was arylated following the general procedure by using **T1**-MeCN (67.0 mg, 0.10 mmol, 1.0 equiv.). After purification by preparative TLC (hexanes/EtOAc = 2:1 v/v), compound **2z** (21.8 mg) was obtained in 73% yield as a colorless oil.

<sup>1</sup>H NMR (600 MHz, CDCl<sub>3</sub>) δ 8.92 (s, 1H), 7.85 (ddd, *J* = 7.8, 1.5, 0.6 Hz, 1H), 7.56 (td, *J* = 7.4, 1.4 Hz, 1H), 7.49–7.41 (m, 3H), 6.87 (d, *J* = 1.4 Hz, 1H), 4.05 (s, 3H), 3.62 (s, 3H); <sup>13</sup>C NMR (151 MHz, CDCl<sub>3</sub>) δ 169.10, 153.23, 152.59, 142.95, 141.87, 140.41, 135.60, 131.40, 131.21, 130.87, 129.92, 127.72, 113.37, 107.91, 56.17, 52.23. HRMS (ESI-TOF) *m/z* calc'd for C<sub>16</sub>H<sub>14</sub>N<sub>1</sub>O<sub>3</sub>S<sub>1</sub> [M+H]<sup>+</sup>: 300.0689; found: 300.0695.

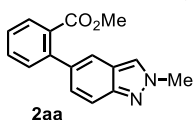

### Methyl 2-(2-methyl-2H-indazol-5-yl)benzoate (**2aa**)

Substrate 2H-indazole was arylated following the general procedure by using **T1**-MeCN (67.0 mg, 0.10 mmol, 1.0 equiv.). After purification by preparative TLC (hexanes/EtOAc = 1:1 v/v), compound **2aa** (8.2 mg) was obtained in 31% yield as a colorless oil.

<sup>1</sup>H NMR (600 MHz, CDCl<sub>3</sub>) δ 7.92 (s, 1H), 7.83 (dd, *J* = 7.8, 1.0 Hz, 1H), 7.70 (d, *J* = 8.9 Hz, 1H), 7.58 (dd, *J* = 1.7, 1.0 Hz, 1H), 7.53 (td, *J* = 7.6, 1.5 Hz, 1H), 7.44 (dd, *J* = 7.7, 0.9 Hz, 1H), 7.41 (td, *J* = 7.5, 1.3 Hz, 1H), 7.23 (dd, *J* = 8.9, 1.7 Hz, 1H), 4.24 (s, 3H), 3.60 (s, 3H); <sup>13</sup>C NMR (151 MHz, CDCl<sub>3</sub>) δ 169.51, 148.45, 142.93, 135.09, 131.33, 131.17, 131.02, 129.88, 127.84, 127.05, 124.09, 122.20, 118.84, 116.78, 52.09, 40.49. HRMS (ESI-TOF) *m/z* calc'd for C<sub>16</sub>H<sub>15</sub>N<sub>2</sub>O<sub>2</sub> [M+H]<sup>+</sup>: 267.1128; found: 267.1137.

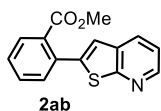

### Methyl 2-(thieno[2,3-*b*]pyridin-2-yl)benzoate (**2ab**)

Substrate thieno[2,3-*b*]pyridine was arylated following the general procedure by using **T1**-MeCN (67.0 mg, 0.10 mmol, 1.0 equiv.). After purification by preparative TLC (hexanes/EtOAc = 4:1 v/v), compound **2ab** (14.8 mg) was obtained in 55% yield as a colorless oil.

The position of C–H arylation on **2ab** was determined by NOESY.

<sup>1</sup>H NMR (600 MHz, CDCl<sub>3</sub>) δ 8.55 (dd, *J* = 4.6, 1.7 Hz, 1H), 8.03 (dd, *J* = 8.0, 1.6 Hz, 1H), 7.83 (d, *J* = 7.6 Hz, 1H), 7.59–7.53 (m, 2H), 7.48 (dt, *J* = 7.7, 4.5 Hz, 1H), 7.31 (dd, *J* = 8.0, 4.6 Hz, 1H), 7.17 (s, 1H), 3.74 (s, 3H); <sup>13</sup>C NMR (151 MHz, CDCl<sub>3</sub>) δ 168.52, 162.36, 146.47, 143.19, 134.20, 133.55, 131.80, 131.57, 131.44, 131.00, 129.97, 128.82, 120.20, 119.82, 52.49. HRMS (ESI-TOF) *m/z* calc'd for C<sub>15</sub>H<sub>12</sub>N<sub>1</sub>O<sub>2</sub>S<sub>1</sub> [M+H]<sup>+</sup>: 270.0583; found: 270.0593.

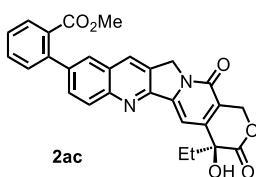

**Methyl 2-(4-ethyl-4-hydroxy-3,14-dioxo-3,4,12,14-tetrahydro-1H-pyrano[3',4':6,7]indolizino[1,2-b]quinolin-9-yl)benzoate (2ac)**

A reaction vial (8 mL) was charged with camptothecin (34.8 mg, 0.10 mmol, 1.0 equiv), **T2**-MeCN (73.2 mg, 0.10 mmol, 1.0 equiv.), and 0.2 mL HFIP. The mixture was stirred for 5 min at room temperature, and then concentrated. Pd(OAc)<sub>2</sub> (2.2 mg, 10 μmol, 10 mol%), Ac-Gly-OH (2.3 mg, 20 μmol, 20 mol%), aryl iodide (0.3 mmol, 3 equiv.), NBE-CO<sub>2</sub>Me (22.8 mg, 0.15 mmol, 1.5 equiv.), AgOAc (50 mg, 0.30 mmol, 3.0 equiv.), Ag<sub>2</sub>CO<sub>3</sub> (27.6 mg, 0.1 mmol, 1.0 equiv.), and HFIP (1.5 ml) were added. The reaction vial was sealed and allowed to stir at 80 °C for 24 h. The reaction mixture was cooled to room temperature. Then a solution of DMAP (36.7 mg, 0.3 mmol, 3 equiv.) in toluene (1.5 mL) was added. The mixture was stirred at 80 °C for 15 min. The reaction mixture was cooled to room temperature, diluted with EtOAc. The mixture was filtered through a short pad of celite and eluted with EtOAc (5 × 2 mL). The filtrate was evaporated under reduced pressure. After purification by preparative TLC (DCM/acetone = 5:1 v/v), compound **2ac** (22.7 mg) was obtained in 47% yield as a white solid.

<sup>1</sup>H NMR (600 MHz, CDCl<sub>3</sub>) δ 8.38 (s, 1H), 8.24 (d, *J* = 8.7 Hz, 1H), 7.97 (dd, *J* = 7.8, 1.0 Hz, 1H), 7.85 (d, *J* = 2.1 Hz, 1H), 7.76 (dd, *J* = 8.7, 2.0 Hz, 1H), 7.71 (s, 1H), 7.62 (td, *J* = 7.6, 1.4 Hz, 1H), 7.51 (td, *J* = 7.6, 1.3 Hz, 1H), 7.47 (dd, *J* = 7.6, 0.9 Hz, 1H), 5.76 (d, *J* = 16.2 Hz, 1H), 5.36–5.25 (m, 3H), 3.84 (s, 1H), 3.63 (s, 3H), 1.98–1.82 (m, 2H), 1.05 (t, *J* = 7.4 Hz, 3H); <sup>13</sup>C NMR (151 MHz, CDCl<sub>3</sub>) δ 174.03, 168.44, 157.77, 152.57, 150.26, 148.34, 146.56, 141.60, 141.56, 132.15, 131.87, 131.15, 131.13, 130.58, 130.54, 129.19, 129.02, 128.14, 128.07, 126.89, 118.79, 98.22, 72.89, 66.48, 52.20, 50.20, 31.75, 7.95. HRMS (ESI-TOF) *m/z* calc'd for C<sub>28</sub>H<sub>23</sub>N<sub>2</sub>O<sub>6</sub> [M+H]<sup>+</sup>: 483.1551; found: 483.1558.

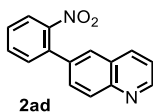

**6-(2-Nitrophenyl)quinoline (2ad)**

Substrate quinoline was arylated following the general procedure by using **T1**-MeCN (67.0 mg, 0.10 mmol, 1.0 equiv.). After purification by preparative TLC (hexanes/EtOAc = 2:1 v/v), compound **2ad** (16.9 mg) was obtained in 68% yield as a yellow oil.

<sup>1</sup>H NMR (600 MHz, CDCl<sub>3</sub>) δ 8.96 (dd, *J* = 4.2, 1.6 Hz, 1H), 8.21–8.13 (m, 2H), 7.96 (dd, *J* = 8.2, 1.2 Hz, 1H), 7.78 (d, *J* = 2.0 Hz, 1H), 7.72–7.63 (m, 2H), 7.58–7.51 (m, 2H), 7.45 (dd, *J* = 8.3, 4.2 Hz, 1H); <sup>13</sup>C NMR (151 MHz, CDCl<sub>3</sub>) δ 151.08, 149.25, 147.82, 136.36, 135.99, 135.86, 132.70, 132.34, 129.96, 129.65, 128.76, 128.22, 126.87, 124.50, 121.81. HRMS (ESI-TOF) *m/z* calc'd for C<sub>15</sub>H<sub>11</sub>N<sub>2</sub>O<sub>2</sub> [M+H]<sup>+</sup>: 251.0815; found: 251.0824.

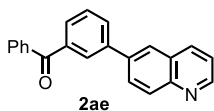

**Phenyl(3-(quinolin-6-yl)phenyl)methanone (2ae)**

Substrate quinoline was arylated following the general procedure by using **T1**-MeCN (67.0 mg, 0.10 mmol, 1.0 equiv.), 20 mol% Pd(OAc)<sub>2</sub>, 40 mol% Ac-Gly-OH, and 1 equiv. NBE-CO<sub>2</sub>Me (no Ag<sub>2</sub>CO<sub>3</sub>). The reaction mixture was stirred at 100 °C for 18 h. After purification by preparative TLC (hexanes/EtOAc = 4:1 v/v), compound **2ae** (14.5 mg) was obtained in 47% yield as a yellow oil.

<sup>1</sup>H NMR (600 MHz, CDCl<sub>3</sub>) δ 8.93 (dd, *J* = 4.2, 1.7 Hz, 1H), 8.22 (dd, *J* = 8.4, 1.3 Hz, 1H), 8.20 (d, *J* = 8.7 Hz, 1H), 8.17 (t, *J* = 1.6 Hz, 1H), 8.05 (d, *J* = 2.1 Hz, 1H), 8.00 (dd, *J* = 8.7, 2.1 Hz, 1H), 7.95 (ddd, *J* = 7.7, 2.0, 1.1

Hz, 1H), 7.87 (dd,  $J = 8.3, 1.3$  Hz, 2H), 7.81 (dt,  $J = 7.7, 1.3$  Hz, 1H), 7.65–7.59 (m, 2H), 7.52 (t,  $J = 7.8$  Hz, 2H), 7.45 (dd,  $J = 8.2, 4.2$  Hz, 1H);  $^{13}\text{C}$  NMR (151 MHz,  $\text{CDCl}_3$ )  $\delta$  196.66, 150.78, 147.90, 140.68, 138.50, 138.33, 137.57, 136.43, 132.75, 131.37, 130.25, 130.22, 129.50, 129.07, 129.03, 128.91, 128.54, 128.51, 125.95, 121.75. HRMS (ESI-TOF)  $m/z$  calc'd for  $\text{C}_{22}\text{H}_{16}\text{N}_1\text{O}_1$   $[\text{M}+\text{H}]^+$ : 310.1226; found: 310.1236.

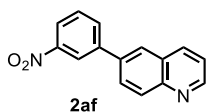

### 6-(3-Nitrophenyl)quinoline (2af)

Substrate quinoline was arylated following the general procedure by using **T1**-MeCN (67.0 mg, 0.10 mmol, 1.0 equiv.), 20 mol%  $\text{Pd}(\text{OAc})_2$ , 40 mol% Ac-Gly-OH, and 1 equiv. NBE- $\text{CO}_2\text{Me}$  (no  $\text{Ag}_2\text{CO}_3$ ). The reaction mixture was stirred at 100 °C for 18 h. After purification by preparative TLC (hexanes/EtOAc = 2:1 v/v), compound **2af** (9.6 mg) was obtained in 38% yield as a white solid.

$^1\text{H}$  NMR (600 MHz,  $\text{CDCl}_3$ )  $\delta$  8.97 (d,  $J = 2.8$  Hz, 1H), 8.59 (s, 1H), 8.30–8.19 (m, 3H), 8.08 (d,  $J = 2.1$  Hz, 1H), 8.05 (d,  $J = 7.8$  Hz, 1H), 7.99 (dd,  $J = 8.8, 2.2$  Hz, 1H), 7.68 (t,  $J = 8.0$  Hz, 1H), 7.49 (dd,  $J = 8.3, 4.2$  Hz, 1H);  $^{13}\text{C}$  NMR (151 MHz,  $\text{CDCl}_3$ )  $\delta$  151.19, 148.95, 148.05, 142.11, 136.85, 136.55, 133.40, 130.60, 130.08, 128.66, 128.52, 126.28, 122.59, 122.38, 122.03. HRMS (ESI-TOF)  $m/z$  calc'd for  $\text{C}_{15}\text{H}_{11}\text{N}_2\text{O}_2$   $[\text{M}+\text{H}]^+$ : 251.0815; found: 251.0821.

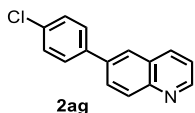

### 6-(4-Chlorophenyl)quinoline (2ag)

Substrate quinoline was arylated following the general procedure by using **T1**-MeCN (67.0 mg, 0.10 mmol, 1.0 equiv.), 20 mol%  $\text{Pd}(\text{OAc})_2$ , 40 mol% Ac-Gly-OH, and 1 equiv. NBE- $\text{CO}_2\text{Me}$  (no  $\text{Ag}_2\text{CO}_3$ ). The reaction mixture was stirred at 100 °C for 18 h. After purification by preparative TLC (DCM/EtOAc = 5:1 v/v), compound **2ag** (9.1 mg) was obtained in 38% yield as a colorless oil.

$^1\text{H}$  NMR (600 MHz,  $\text{CDCl}_3$ )  $\delta$  8.93 (dd,  $J = 4.2, 1.8$  Hz, 1H), 8.21 (dd,  $J = 8.3, 1.6$  Hz, 1H), 8.18 (d,  $J = 8.6$  Hz, 1H), 7.97 (d,  $J = 2.1$  Hz, 1H), 7.94 (dd,  $J = 8.7, 2.2$  Hz, 1H), 7.65 (d,  $J = 8.7$  Hz, 2H), 7.47 (d,  $J = 8.7$  Hz, 2H), 7.44 (dd,  $J = 8.2, 4.2$  Hz, 1H);  $^{13}\text{C}$  NMR (151 MHz,  $\text{CDCl}_3$ )  $\delta$  150.68, 147.81, 138.88, 138.21, 136.36, 134.08, 130.19, 129.25, 129.00, 128.80, 128.55, 125.57, 121.74. HRMS (ESI-TOF)  $m/z$  calc'd for  $\text{C}_{15}\text{H}_{11}\text{Cl}_1\text{N}_1$   $[\text{M}+\text{H}]^+$ : 240.0575; found: 240.0584.

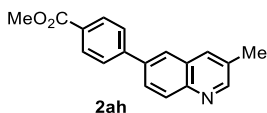

### Methyl 4-(3-methylquinolin-6-yl)benzoate (2ah)

Substrate 3-methyl-quinoline was arylated following the general procedure by using **T1**-MeCN (67.0 mg, 0.10 mmol, 1.0 equiv.), 20 mol%  $\text{Pd}(\text{OAc})_2$ , 40 mol% Ac-Gly-OH, and 1 equiv. NBE- $\text{CO}_2\text{Me}$  (no  $\text{Ag}_2\text{CO}_3$ ). The reaction mixture was stirred at 100 °C for 18 h. After purification by preparative TLC (hexanes/EtOAc = 2:1 v/v), compound **2ah** (14.8 mg) was obtained in 53% yield as a white solid.

$^1\text{H}$  NMR (600 MHz,  $\text{CDCl}_3$ )  $\delta$  8.79 (d,  $J = 2.2$  Hz, 1H), 8.19–8.13 (m, 3H), 8.00–7.95 (m, 2H), 7.92 (dd,  $J = 8.7, 2.1$  Hz, 1H), 7.78 (d,  $J = 8.7$  Hz, 2H), 3.96 (s, 3H), 2.55 (s, 3H);  $^{13}\text{C}$  NMR (151 MHz,  $\text{CDCl}_3$ )  $\delta$  167.02, 152.94, 146.31, 145.01, 138.19, 135.09, 131.29, 130.34, 129.94, 129.34, 128.37, 128.02, 127.45, 125.56, 52.31, 18.93. HRMS (ESI-TOF)  $m/z$  calc'd for  $\text{C}_{18}\text{H}_{16}\text{N}_1\text{O}_2$   $[\text{M}+\text{H}]^+$ : 278.1176; found: 278.1187.

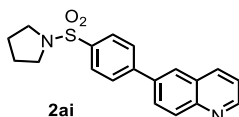

### 6-(4-(Pyrrolidin-1-ylsulfonyl)phenyl)quinoline (2ai)

Substrate quinoline was arylated following the general procedure by using **T1**-MeCN (67.0 mg, 0.10 mmol, 1.0 equiv.), 20 mol% Pd(OAc)<sub>2</sub>, 40 mol% Ac-Gly-OH, and 1 equiv. NBE-CO<sub>2</sub>Me (no Ag<sub>2</sub>CO<sub>3</sub>). The reaction mixture was stirred at 100 °C for 18 h. After purification by preparative TLC (hexanes/EtOAc = 1:2 v/v), compound **2ai** (13.8 mg) was obtained in 41% yield as a white solid.

<sup>1</sup>H NMR (600 MHz, CDCl<sub>3</sub>) δ 8.97 (dd, *J* = 4.2, 1.8 Hz, 1H), 8.28–8.18 (m, 2H), 8.06 (d, *J* = 2.1 Hz, 1H), 8.01–7.93 (m, 3H), 7.87 (d, *J* = 8.7 Hz, 2H), 7.48 (dd, *J* = 8.2, 4.2 Hz, 1H), 3.35–3.29 (m, 4H), 1.83–1.79 (m, 4H); <sup>13</sup>C NMR (151 MHz, CDCl<sub>3</sub>) δ 151.11, 148.08, 144.62, 137.58, 136.55, 136.24, 130.44, 128.90, 128.51, 128.30, 128.07, 126.39, 121.95, 48.10, 25.41. HRMS (ESI-TOF) *m/z* calc'd for C<sub>19</sub>H<sub>19</sub>N<sub>2</sub>O<sub>2</sub>S<sub>1</sub> [M+H]<sup>+</sup>: 339.1162; found: 339.1172.

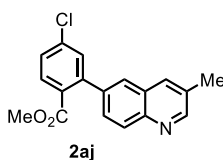

### Methyl 4-chloro-2-(3-methylquinolin-6-yl)benzoate (2aj)

Substrate 3-methyl-quinoline was arylated following the general procedure by using **T1**-MeCN (67.0 mg, 0.10 mmol, 1.0 equiv). After purification by preparative TLC (hexanes/EtOAc = 2:1 v/v), compound **2aj** (14.6 mg) was obtained in 47% yield as a yellow oil.

<sup>1</sup>H NMR (600 MHz, CDCl<sub>3</sub>) δ 8.79 (d, *J* = 2.2 Hz, 1H), 8.07 (d, *J* = 8.6 Hz, 1H), 7.92 (s, 1H), 7.89 (d, *J* = 2.3 Hz, 1H), 7.65 (d, *J* = 2.1 Hz, 1H), 7.56–7.51 (m, 2H), 7.39 (d, *J* = 8.1 Hz, 1H), 3.61 (s, 3H), 2.53 (s, 3H); <sup>13</sup>C NMR (151 MHz, CDCl<sub>3</sub>) δ 167.57, 152.73, 145.90, 140.52, 138.69, 134.90, 133.81, 132.43, 132.18, 131.59, 131.16, 130.18, 129.53, 128.83, 127.98, 126.17, 52.40, 18.90. HRMS (ESI-TOF) *m/z* calc'd for C<sub>18</sub>H<sub>15</sub>Cl<sub>1</sub>N<sub>1</sub>O<sub>2</sub> [M+H]<sup>+</sup>: 312.0786; found: 312.0796.

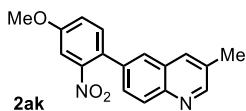

### 6-(4-Methoxy-2-nitrophenyl)-3-methylquinoline (2ak)

Substrate 3-methyl-quinoline was arylated following the general procedure by using **T1**-MeCN (67.0 mg, 0.10 mmol, 1.0 equiv). After purification by preparative TLC (hexanes/EtOAc = 2:1 v/v), compound **2ak** (21.2 mg) was obtained in 72% yield as a yellow solid.

<sup>1</sup>H NMR (600 MHz, CDCl<sub>3</sub>) δ 8.79 (d, *J* = 2.3 Hz, 1H), 8.08 (d, *J* = 8.7 Hz, 1H), 7.90 (s, 1H), 7.64 (d, *J* = 2.1 Hz, 1H), 7.54 (dd, *J* = 8.6, 2.1 Hz, 1H), 7.45 (d, *J* = 2.7 Hz, 1H), 7.42 (d, *J* = 8.5 Hz, 1H), 7.20 (dd, *J* = 8.5, 2.7 Hz, 1H), 3.92 (s, 3H), 2.52 (s, 3H); <sup>13</sup>C NMR (151 MHz, CDCl<sub>3</sub>) δ 159.49, 152.89, 149.71, 145.95, 135.85, 134.89, 133.13, 131.23, 129.54, 128.94, 128.25, 128.13, 126.19, 119.02, 109.36, 56.09, 18.88. HRMS (ESI-TOF) *m/z* calc'd for C<sub>17</sub>H<sub>15</sub>N<sub>2</sub>O<sub>3</sub> [M+H]<sup>+</sup>: 295.1077; found: 295.1081.

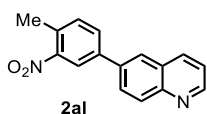

### 6-(4-Methyl-3-nitrophenyl)quinoline (2al)



Substrate quinoline was arylated following the general procedure by using **T1**-MeCN (67.0 mg, 0.10 mmol, 1.0 equiv.), 20 mol% Pd(OAc)<sub>2</sub>, 40 mol% Ac-Gly-OH, and 1 equiv. NBE-CO<sub>2</sub>Me (no Ag<sub>2</sub>CO<sub>3</sub>). The reaction mixture was stirred at 100 °C for 18 h. After purification by preparative TLC (hexanes/EtOAc = 2:1 v/v), compound **2al** (14.7 mg) was obtained in 52% yield as a yellow solid.

<sup>1</sup>H NMR (600 MHz, CDCl<sub>3</sub>) δ 8.95 (dd, *J* = 4.1, 1.5 Hz, 1H), 8.34 (d, *J* = 2.1 Hz, 1H), 8.25 (d, *J* = 7.8 Hz, 1H), 8.21 (d, *J* = 8.7 Hz, 1H), 8.04 (d, *J* = 2.2 Hz, 1H), 7.97 (dd, *J* = 8.7, 2.2 Hz, 1H), 7.86 (dd, *J* = 7.9, 2.0 Hz, 1H), 7.51–7.44 (m, 2H), 2.68 (d, *J* = 0.5 Hz, 3H); <sup>13</sup>C NMR (151 MHz, CDCl<sub>3</sub>) δ 150.97, 149.81, 147.84, 139.51, 136.77, 136.61, 133.60, 132.98, 131.66, 130.37, 128.65, 128.56, 125.85, 123.42, 121.96, 20.34. HRMS (ESI-TOF) *m/z* calc'd for C<sub>16</sub>H<sub>13</sub>N<sub>2</sub>O<sub>2</sub> [M+H]<sup>+</sup>: 265.0972; found: 265.0978.

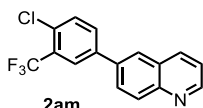

### 6-(4-Chloro-3-(trifluoromethyl)phenyl)quinoline (**2am**)

Substrate quinoline was arylated following the general procedure by using **T1**-MeCN (67.0 mg, 0.10 mmol, 1.0 equiv.), 20 mol% Pd(OAc)<sub>2</sub>, 40 mol% Ac-Gly-OH, and 1 equiv. NBE-CO<sub>2</sub>Me (no Ag<sub>2</sub>CO<sub>3</sub>). The reaction mixture was stirred at 100 °C for 18 h. After purification by preparative TLC (hexanes/EtOAc = 2:1 v/v), compound **2am** (12.7 mg) was obtained in 41% yield as a white solid.

<sup>1</sup>H NMR (600 MHz, CDCl<sub>3</sub>) δ 8.96 (dd, *J* = 4.2, 1.7 Hz, 1H), 8.27–8.18 (m, 2H), 8.02 (d, *J* = 2.3 Hz, 1H), 8.00 (d, *J* = 2.2 Hz, 1H), 7.93 (dd, *J* = 8.7, 2.2 Hz, 1H), 7.81 (dd, *J* = 8.3, 2.1 Hz, 1H), 7.64 (d, *J* = 8.3 Hz, 1H), 7.47 (dd, *J* = 8.3, 4.2 Hz, 1H); <sup>13</sup>C NMR (151 MHz, CDCl<sub>3</sub>) δ 151.14, 148.03, 139.41, 136.84, 136.42, 132.19, 131.86 (q, *J* = 1.9 Hz), 131.63, 130.62, 129.10 (q, *J* = 31.4 Hz), 128.60, 128.51, 126.56 (q, *J* = 5.2 Hz), 125.99, 122.93 (q, *J* = 273.4 Hz), 121.99; <sup>19</sup>F NMR (376 MHz, CDCl<sub>3</sub>) δ -62.89. HRMS (ESI-TOF) *m/z* calc'd for C<sub>16</sub>H<sub>10</sub>ClF<sub>3</sub>N<sub>1</sub> [M+H]<sup>+</sup>: 308.0448; found: 308.0448.

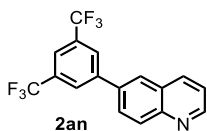

### 6-(3,5-Bis(trifluoromethyl)phenyl)quinoline (**2an**)

Substrate quinoline was arylated following the general procedure by using **T1**-MeCN (67.0 mg, 0.10 mmol, 1.0 equiv.), 20 mol% Pd(OAc)<sub>2</sub>, 40 mol% Ac-Gly-OH, and 1 equiv. NBE-CO<sub>2</sub>Me (no Ag<sub>2</sub>CO<sub>3</sub>). The reaction mixture was stirred at 100 °C for 18 h. After purification by preparative TLC (hexanes/EtOAc = 2:1 v/v), compound **2an** (12.6 mg) was obtained in 37% yield as a white solid.

<sup>1</sup>H NMR (600 MHz, CDCl<sub>3</sub>) δ 8.99 (dd, *J* = 4.2, 1.8 Hz, 1H), 8.30–8.24 (m, 2H), 8.15 (s, 2H), 8.06 (d, *J* = 2.1 Hz, 1H), 7.98 (dd, *J* = 8.7, 2.2 Hz, 1H), 7.92 (s, 1H), 7.50 (dd, *J* = 8.2, 4.2 Hz, 1H); <sup>13</sup>C NMR (151 MHz, CDCl<sub>3</sub>) δ 151.47, 148.21, 142.61, 136.52, 136.38, 132.49 (q, *J* = 33.3 Hz), 130.88, 128.55, 128.51, 127.70–127.57 (m), 126.52, 123.42 (q, *J* = 272.6 Hz), 122.16, 121.57–121.41 (m); <sup>19</sup>F NMR (376 MHz, CDCl<sub>3</sub>) δ -63.10. HRMS (ESI-TOF) *m/z* calc'd for C<sub>17</sub>H<sub>10</sub>F<sub>6</sub>N<sub>1</sub> [M+H]<sup>+</sup>: 342.0712; found: 342.0724.

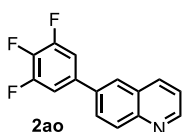

### 6-(3,4,5-Trifluorophenyl)quinoline (**2ao**)

Substrate quinoline was arylated following the general procedure by using **T1**-MeCN (67.0 mg, 0.10 mmol, 1.0 equiv.), 20 mol% Pd(OAc)<sub>2</sub>, 40 mol% Ac-Gly-OH, and 1 equiv. NBE-CO<sub>2</sub>Me (no Ag<sub>2</sub>CO<sub>3</sub>). The reaction mixture was stirred at 100 °C for 18 h. After purification by preparative TLC (hexanes/EtOAc = 2:1 v/v), compound **2a** (8 mg) was obtained in 31% yield as a white solid.

<sup>1</sup>H NMR (600 MHz, CDCl<sub>3</sub>) δ 8.96 (dd, *J* = 4.2, 1.7 Hz, 1H), 8.25–8.16 (m, 3H), 7.94 (d, *J* = 2.2 Hz, 1H), 7.87 (dd, *J* = 8.8, 2.1 Hz, 1H), 7.47 (dd, *J* = 8.2, 4.2 Hz, 1H), 7.36–7.29 (m, 1H); <sup>13</sup>C NMR (151 MHz, CDCl<sub>3</sub>) δ 151.68 (ddd, *J* = 250.2, 9.9, 4.2 Hz), 151.18, 148.05, 136.72–136.48 (m), 136.41, 130.60, 128.43, 128.42, 125.87, 122.02, 111.57 (dd, *J* = 17.1, 5.0 Hz); <sup>19</sup>F NMR (376 MHz, CDCl<sub>3</sub>) δ -133.89 (d, *J* = 20.7 Hz), -162.04 (t, *J* = 20.4 Hz). HRMS (ESI-TOF) *m/z* calc'd for C<sub>15</sub>H<sub>9</sub>F<sub>3</sub>N<sub>1</sub> [M+H]<sup>+</sup>: 260.0682; found: 260.0689.

**Investigation of regioselectivity:** In the representative examples (**2a**, **2e**, **2af**), either less than 5% of the over-arylated product (eq. 1) or none regio-isomer (eq. 2, eq. 3) was isolated.

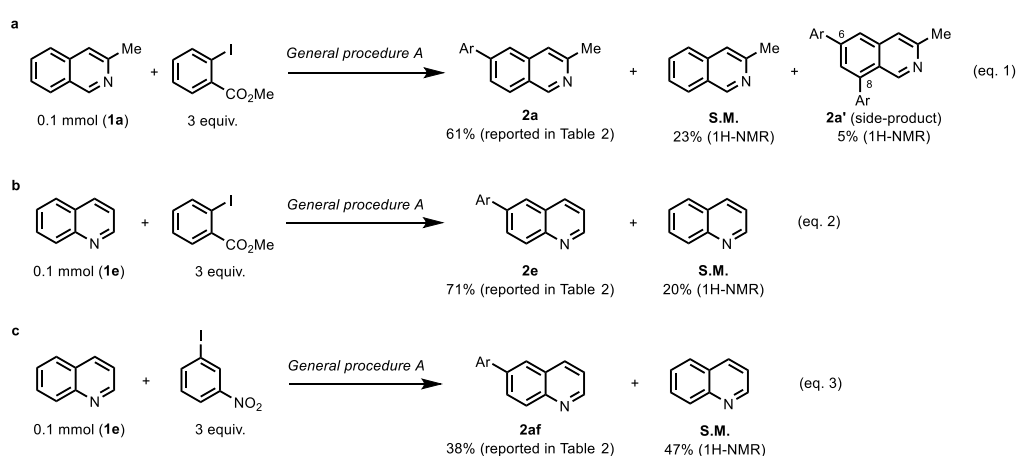

**Figure 1** Investigation of regioselectivity

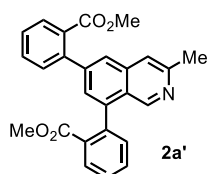

### Dimethyl 2,2'-(3-methylisoquinoline-6,8-diyl)dibenzoate (**2a'**)

<sup>1</sup>H NMR (600 MHz, CDCl<sub>3</sub>) δ 8.80 (s, 1H), 8.08 (dd, *J* = 7.9, 1.1 Hz, 1H), 7.90 (dd, *J* = 7.7, 0.9 Hz, 1H), 7.67 (s, 1H), 7.62 (td, *J* = 7.5, 1.4 Hz, 1H), 7.58 (td, *J* = 7.6, 1.4 Hz, 1H), 7.56–7.52 (m, 2H), 7.50–7.45 (m, 2H), 7.40 (dd, *J* = 7.6, 1.0 Hz, 1H), 7.25 (d, *J* = 1.7 Hz, 1H), 3.64 (s, 3H), 3.51 (s, 3H), 2.69 (s, 3H); <sup>13</sup>C NMR (151 MHz, CDCl<sub>3</sub>) δ 168.72, 167.32, 151.74, 150.17, 143.08, 141.84, 140.16, 139.59, 136.55, 131.98, 131.86, 131.63, 131.28, 131.08, 130.89, 130.55, 130.26, 128.32, 127.94, 127.74, 124.72, 124.27, 118.98, 52.24, 52.03, 24.12. HRMS (ESI-TOF) *m/z* calc'd for C<sub>26</sub>H<sub>22</sub>N<sub>1</sub>O<sub>4</sub> [M+H]<sup>+</sup>: 412.1543; found: 412.1549.

### C. Pd-Catalyzed C7 Arylation of Tetrahydroisoquinolines

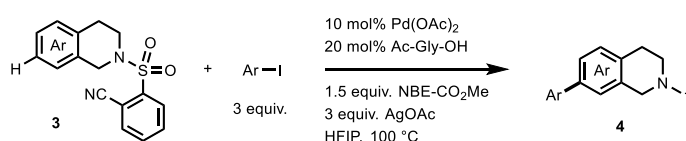

**General procedure B:** Tetrahydroisoquinoline **3** (0.10 mmol, 1.0 equiv.), Pd(OAc)<sub>2</sub> (2.2 mg, 10 μmol, 10

mol%), Ac-Gly-OH (2.3 mg, 20  $\mu$ mol, 20 mol%), aryl iodide (0.3 mmol, 3 equiv.), NBE-CO<sub>2</sub>Me (22.8 mg, 0.15 mmol, 1.5 equiv.), AgOAc (50 mg, 0.30 mmol, 3.0 equiv.), and HFIP (1 ml) were added to a reaction vial (8 mL). The reaction vial was sealed and allowed to stir at 100 °C for 18 h. The reaction mixture was cooled to room temperature, and then diluted with EtOAc. The mixture was filtered through a short pad of celite and eluted with EtOAc (2  $\times$  2 mL). The filtrate was evaporated under reduced pressure. Purification by preparative TLC afforded the title compound.

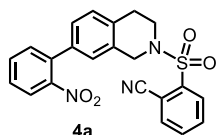

#### 2-((7-(2-Nitrophenyl)-3,4-dihydroisoquinolin-2(1H)-yl)sulfonyl)benzonitrile (4a)

Substrate arene was arylated following the general procedure. After purification by preparative TLC (hexanes/EtOAc = 2:1 v/v), compound **4a** (23.2 mg) was obtained in 55% yield as a yellow solid.

<sup>1</sup>H NMR (600 MHz, CDCl<sub>3</sub>)  $\delta$  8.12 (dd,  $J$  = 8.0, 1.3 Hz, 1H), 7.87 (dd,  $J$  = 7.6, 1.3 Hz, 1H), 7.84 (dd,  $J$  = 8.1, 1.3 Hz, 1H), 7.77 (td,  $J$  = 7.8, 1.3 Hz, 1H), 7.69 (td,  $J$  = 7.6, 1.3 Hz, 1H), 7.61 (td,  $J$  = 7.6, 1.3 Hz, 1H), 7.48 (td,  $J$  = 7.8, 1.4 Hz, 1H), 7.39 (dd,  $J$  = 7.7, 1.4 Hz, 1H), 7.14 (d,  $J$  = 8.0 Hz, 1H), 7.12–7.08 (m, 1H), 7.04 (s, 1H), 4.51 (s, 2H), 3.69 (t,  $J$  = 6.0 Hz, 2H), 3.00 (t,  $J$  = 6.0 Hz, 2H); <sup>13</sup>C NMR (151 MHz, CDCl<sub>3</sub>)  $\delta$  149.20, 140.90, 135.87, 135.77, 135.73, 133.32, 133.07, 132.91, 132.51, 131.99, 131.91, 130.42, 129.42, 128.42, 126.67, 125.86, 124.24, 116.35, 110.94, 47.29, 43.61, 28.47. HRMS (ESI-TOF)  $m/z$  calc'd for C<sub>22</sub>H<sub>18</sub>N<sub>3</sub>O<sub>4</sub>S [M+H]<sup>+</sup>: 420.1013; found: 420.1011.

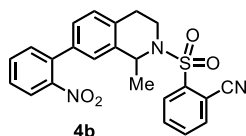

#### 2-((1-Methyl-7-(2-nitrophenyl)-3,4-dihydroisoquinolin-2(1H)-yl)sulfonyl)benzonitrile (4b)

Substrate arene was arylated following the general procedure. After purification by preparative TLC (hexanes/EtOAc = 1:1 v/v), compound **4b** (19.1 mg) was obtained in 44% yield as a colorless oil.

<sup>1</sup>H NMR (600 MHz, CD<sub>3</sub>CN)  $\delta$  8.10 (dd,  $J$  = 8.0, 0.6 Hz, 1H), 7.90–7.85 (m, 2H), 7.78 (td,  $J$  = 7.8, 1.4 Hz, 1H), 7.70 (dtd,  $J$  = 10.1, 7.6, 1.2 Hz, 2H), 7.56 (ddd,  $J$  = 8.1, 7.4, 1.4 Hz, 1H), 7.50–7.47 (m, 1H), 7.15 (s, 1H), 7.12–7.08 (m, 2H), 5.20 (q,  $J$  = 7.1 Hz, 1H), 4.10–3.97 (m, 1H), 3.64–3.53 (m, 1H), 2.87–2.71 (m, 2H), 1.46 (d,  $J$  = 6.8 Hz, 3H); <sup>13</sup>C NMR (151 MHz, CD<sub>3</sub>CN)  $\delta$  150.22, 143.60, 138.81, 136.91, 136.42, 136.14, 134.47, 134.01, 133.90, 133.65, 132.90, 130.90, 130.50, 129.62, 127.41, 127.28, 125.07, 117.24, 110.71, 53.00, 39.35, 28.08, 23.33. HRMS (ESI-TOF)  $m/z$  calc'd for C<sub>23</sub>H<sub>20</sub>N<sub>3</sub>O<sub>4</sub>S<sub>1</sub> [M+H]<sup>+</sup>: 434.1169; found: 434.1170.

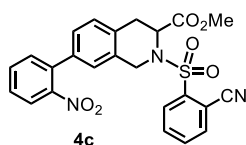

#### Methyl 2-((2-cyanophenyl)sulfonyl)-7-(2-nitrophenyl)-1,2,3,4-tetrahydroisoquinoline-3-carboxylate (4c)

Substrate arene was arylated following the general procedure by using 20 mol% Pd(OAc)<sub>2</sub>, 40 mol% Ac-Gly-OH. After purification by preparative TLC (hexanes/EtOAc = 1:2 v/v), compound **4c** (22.4 mg) was obtained in 47% yield as a colorless oil.

<sup>1</sup>H NMR (600 MHz, CDCl<sub>3</sub>) δ 8.17 (d, *J* = 7.9 Hz, 1H), 7.86 (d, *J* = 7.6 Hz, 1H), 7.84 (d, *J* = 8.1 Hz, 1H), 7.76 (t, *J* = 7.8 Hz, 1H), 7.69 (t, *J* = 7.4 Hz, 1H), 7.60 (t, *J* = 7.6 Hz, 1H), 7.48 (t, *J* = 7.8 Hz, 1H), 7.37 (d, *J* = 7.6 Hz, 1H), 7.18 (d, *J* = 7.9 Hz, 1H), 7.11 (d, *J* = 8.9 Hz, 1H), 6.99 (s, 1H), 5.33 (dd, *J* = 6.6, 2.2 Hz, 1H), 4.63 (d, *J* = 4.9 Hz, 2H), 3.62 (s, 3H), 3.48 (dd, *J* = 16.5, 6.6 Hz, 1H), 3.38 (d, *J* = 16.5 Hz, 1H); <sup>13</sup>C NMR (151 MHz, CDCl<sub>3</sub>) δ 170.68, 149.17, 141.98, 136.21, 135.61, 135.52, 132.91, 132.85, 132.49, 131.99, 131.19, 130.90, 130.56, 129.45, 128.47, 126.79, 125.72, 124.26, 116.40, 110.92, 54.64, 52.86, 44.41, 31.33. HRMS (ESI-TOF) *m/z* calc'd for C<sub>24</sub>H<sub>20</sub>N<sub>3</sub>O<sub>6</sub>S [M+H]<sup>+</sup>: 478.1067; found: 478.1069.

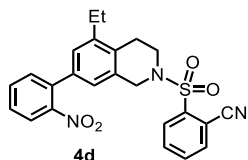

#### 2-((5-Ethyl-7-(2-nitrophenyl)-3,4-dihydroisoquinolin-2(1H)-yl)sulfonyl)benzonitrile (**4d**)

Substrate arene was arylated following the general procedure. After purification by preparative TLC (hexanes/EtOAc = 1:1 v/v), compound **4d** (21.5 mg) was obtained in 48% yield as a yellow oil.

<sup>1</sup>H NMR (600 MHz, CDCl<sub>3</sub>) δ 8.12 (d, *J* = 7.9 Hz, 1H), 7.87 (d, *J* = 7.6 Hz, 1H), 7.83 (d, *J* = 8.1 Hz, 1H), 7.76 (t, *J* = 7.8 Hz, 1H), 7.68 (t, *J* = 7.6 Hz, 1H), 7.60 (t, *J* = 7.5 Hz, 1H), 7.47 (t, *J* = 7.7 Hz, 1H), 7.41 (d, *J* = 7.7 Hz, 1H), 6.99 (s, 1H), 6.89 (s, 1H), 4.49 (s, 2H), 3.72 (t, *J* = 6.0 Hz, 2H), 2.92 (t, *J* = 6.0 Hz, 2H), 2.57 (q, *J* = 7.5 Hz, 2H), 1.16 (t, *J* = 7.5 Hz, 3H). <sup>13</sup>C NMR (151 MHz, CDCl<sub>3</sub>) δ 149.27, 142.95, 140.81, 135.93, 135.73, 135.65, 133.05, 132.87, 132.42, 131.98, 131.90, 131.26, 130.42, 128.28, 126.20, 124.15, 123.55, 116.37, 111.00, 47.77, 43.74, 29.35, 25.48, 14.14. HRMS (ESI-TOF) *m/z* calc'd for C<sub>24</sub>H<sub>22</sub>N<sub>3</sub>O<sub>4</sub>S [M+H]<sup>+</sup>: 448.1326; found: 448.1328.

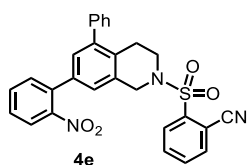

#### 2-((7-(2-Nitrophenyl)-5-phenyl-3,4-dihydroisoquinolin-2(1H)-yl)sulfonyl)benzonitrile (**4e**)

Substrate arene was arylated following the general procedure by using 20 mol% Pd(OAc)<sub>2</sub>, 40 mol% Ac-Gly-OH. After purification by preparative TLC (hexanes/EtOAc = 2:1 v/v), compound **4e** (23.2 mg) was obtained in 45% yield as a colorless oil.

<sup>1</sup>H NMR (600 MHz, CDCl<sub>3</sub>) δ 8.12 (d, *J* = 8.0 Hz, 1H), 7.88 (d, *J* = 8.1 Hz, 1H), 7.86 (d, *J* = 7.9 Hz, 1H), 7.77 (t, *J* = 7.8 Hz, 1H), 7.70 (t, *J* = 7.6 Hz, 1H), 7.61 (t, *J* = 7.6 Hz, 1H), 7.48 (t, *J* = 7.1 Hz, 1H), 7.44 (d, *J* = 7.7 Hz, 1H), 7.40 (t, *J* = 7.3 Hz, 2H), 7.35 (t, *J* = 7.4 Hz, 1H), 7.24 (d, *J* = 6.9 Hz, 2H), 7.07 (d, *J* = 7.2 Hz, 2H), 4.59 (s, 2H), 3.59 (t, *J* = 5.9 Hz, 2H), 2.86 (t, *J* = 5.9 Hz, 2H). <sup>13</sup>C NMR (151 MHz, CDCl<sub>3</sub>) δ 149.15, 142.63, 140.89, 139.93, 135.78, 135.73, 135.61, 133.06, 132.90, 132.57, 132.40, 132.08, 131.27, 130.47, 129.14, 128.49, 128.44, 128.12, 127.62, 125.00, 124.34, 116.35, 111.05, 47.58, 43.77, 27.60. HRMS (ESI-TOF) *m/z* calc'd for C<sub>28</sub>H<sub>22</sub>N<sub>3</sub>O<sub>4</sub>S [M+H]<sup>+</sup>: 496.1326; found: 496.1326.

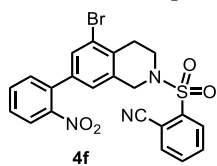

#### 2-((5-Bromo-7-(2-nitrophenyl)-3,4-dihydroisoquinolin-2(1H)-yl)sulfonyl)benzonitrile (**4f**)

Substrate arene was arylated following the general procedure. After purification by preparative TLC (hexanes/EtOAc = 1:1 v/v), compound **4f** (15.2 mg) was obtained in 31% yield as a yellow oil.

The position of C–H arylation on **4f** was determined by NOESY.

<sup>1</sup>H NMR (600 MHz, CDCl<sub>3</sub>) δ 8.12 (dd, *J* = 7.9, 0.9 Hz, 1H), 7.91 (dd, *J* = 8.2, 1.2 Hz, 1H), 7.87 (dd, *J* = 7.6, 1.0 Hz, 1H), 7.77 (td, *J* = 7.8, 1.4 Hz, 1H), 7.70 (td, *J* = 7.6, 1.3 Hz, 1H), 7.63 (td, *J* = 7.6, 1.3 Hz, 1H), 7.52 (ddd, *J* = 8.1, 7.6, 1.4 Hz, 1H), 7.40 (d, *J* = 1.8 Hz, 1H), 7.38 (dd, *J* = 7.7, 1.3 Hz, 1H), 7.00 (d, *J* = 1.6 Hz, 1H), 4.53 (s, 2H), 3.70 (t, *J* = 6.1 Hz, 2H), 2.96 (t, *J* = 6.2 Hz, 2H); <sup>13</sup>C NMR (151 MHz, CDCl<sub>3</sub>) δ 148.87, 140.96, 137.41, 135.78, 134.47, 134.16, 133.12, 133.05, 133.03, 132.78, 132.02, 130.51, 130.40, 128.99, 125.51, 125.17, 124.49, 116.26, 110.98, 47.53, 43.66, 29.30. HRMS (ESI-TOF) *m/z* calc'd for C<sub>22</sub>H<sub>17</sub>BrN<sub>3</sub>O<sub>4</sub>S<sub>1</sub> [M+H]<sup>+</sup>: 498.0118; found: 498.0116.

#### D. Pd-Catalyzed *para*-Arylation of Phenylpropanoic Acid Derivatives

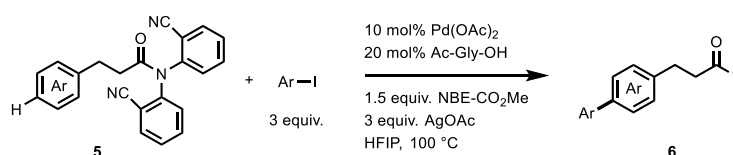

**General procedure C:** Phenylpropanoic acid derivative **5** (0.10 mmol, 1.0 equiv. ), Pd(OAc)<sub>2</sub> (2.2 mg, 10 μmol, 10 mol%), Ac-Gly-OH (2.3 mg, 20 μmol, 20 mol%), aryl iodide (0.3 mmol, 3 equiv.), NBE-CO<sub>2</sub>Me (22.8 mg, 0.15 mmol, 1.5 equiv.), AgOAc (50 mg, 0.30 mmol, 3.0 equiv.), and HFIP (1 ml) were added to a reaction vial (8 mL). The reaction vial was sealed and allowed to stir at 100 °C for 18 h. The reaction mixture was cooled to room temperature, and then diluted with EtOAc. The mixture was filtered through a short pad of celite and eluted with EtOAc (2 × 2 mL). The filtrate was evaporated under reduced pressure. Purification by preparative TLC afforded the title compound.

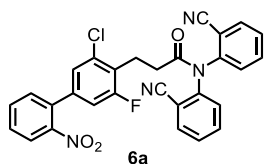

#### 3-(3-Chloro-5-fluoro-2'-nitro-[1,1'-biphenyl]-4-yl)-*N,N*-bis(2-cyanophenyl)propanamide (**6a**)

Substrate arene was arylated following the general procedure. After purification by preparative TLC (hexanes/EtOAc = 2:1 v/v), compound **6a** (40.2 mg) was obtained in 77% yield as a colorless oil.

The position of C–H arylation on **6a** was determined by NOESY.

<sup>1</sup>H NMR (600 MHz, CDCl<sub>3</sub>) δ 7.89 (dd, *J* = 8.1, 1.3 Hz, 1H), 7.85–7.39 (m, 8H), 7.63 (td, *J* = 7.6, 1.3 Hz, 1H), 7.53 (td, *J* = 7.8, 1.4 Hz, 1H), 7.36 (dd, *J* = 7.6, 1.5 Hz, 1H), 7.07 (s, 1H), 6.89 (dd, *J* = 9.4, 1.7 Hz, 1H), 3.31–3.25 (m, 2H), 2.63 (s, 2H); <sup>13</sup>C NMR (151 MHz, CDCl<sub>3</sub>) δ 171.41, 161.12 (d, *J* = 249.8 Hz), 148.75, 144.06, 143.92, 138.03 (d, *J* = 9.9 Hz), 135.54 (d, *J* = 6.6 Hz), 134.92, 134.64, 134.23, 133.94 (d, *J* = 2.2 Hz), 133.89, 132.80, 131.83, 130.60, 129.64, 129.32, 129.19, 128.34, 126.02 (d, *J* = 18.7 Hz), 124.75 (d, *J* = 3.3 Hz), 124.45, 117.06, 116.39, 114.01 (d, *J* = 24.2 Hz), 113.19, 112.99, 33.30, 22.31 (d, *J* = 2.8 Hz); <sup>19</sup>F NMR (376 MHz, CDCl<sub>3</sub>) δ -112.91. HRMS (ESI-TOF) *m/z* calc'd for C<sub>29</sub>H<sub>19</sub>ClF<sub>1</sub>N<sub>4</sub>O<sub>3</sub> [M+H]<sup>+</sup>: 525.1124; found: 525.1140.

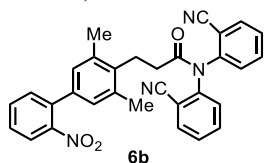

#### *N,N*-Bis(2-cyanophenyl)-3-(3,5-dimethyl-2'-nitro-[1,1'-biphenyl]-4-yl)propanamide (**6b**)

Substrate arene was arylated following the general procedure. After purification by preparative TLC (hexanes/EtOAc = 2:1 v/v), compound **6b** (23.2 mg) was obtained in 46% yield as a yellow oil.

<sup>1</sup>H NMR (600 MHz, CDCl<sub>3</sub>) δ 7.84–7.34 (m, 9H), 7.57 (td, *J* = 7.6, 1.3 Hz, 1H), 7.43 (ddd, *J* = 8.1, 7.4, 1.4 Hz, 1H), 7.39 (dd, *J* = 7.7, 1.4 Hz, 1H), 6.92 (s, 2H), 3.15 (dd, *J* = 9.0, 7.9 Hz, 2H), 2.49 (d, *J* = 24.9 Hz, 2H), 2.25 (s, 6H); <sup>13</sup>C NMR (151 MHz, CDCl<sub>3</sub>) δ 172.13, 149.37, 144.33, 144.11, 137.37, 137.02, 136.20, 135.22, 135.02, 134.66, 134.30, 133.85, 132.22, 132.04, 130.45, 129.57, 129.18, 128.36, 127.95, 127.65, 124.02, 117.18, 116.44, 113.25, 33.66, 25.23, 19.87. HRMS (ESI-TOF) *m/z* calc'd for C<sub>31</sub>H<sub>25</sub>N<sub>4</sub>O<sub>3</sub> [M+H]<sup>+</sup>: 501.1921; found: 501.1925.

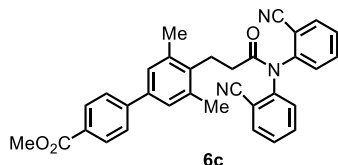

#### Methyl 4'-(3-(bis(2-cyanophenyl)amino)-3-oxopropyl)-3',5'-dimethyl-[1,1'-biphenyl]-4-carboxylate (**6c**)

Substrate arene was arylated following the general procedure by using 0.5 ml HFIP. After purification by preparative TLC (hexanes/EtOAc = 2:1 v/v), compound **6c** (20 mg) was obtained in 39% yield as a white solid.

<sup>1</sup>H NMR (600 MHz, CDCl<sub>3</sub>) δ 8.06 (d, *J* = 8.7 Hz, 2H), 7.78 (d, *J* = 7.8 Hz, 2H), 7.74–7.38 (m, 6H), 7.60 (d, *J* = 8.7 Hz, 2H), 7.23 (s, 2H), 3.93 (s, 3H), 3.17 (t, *J* = 8.6 Hz, 2H), 2.67–2.37 (m, 2H), 2.32 (s, 6H); <sup>13</sup>C NMR (151 MHz, CDCl<sub>3</sub>) δ 172.14, 167.28, 145.58, 144.48, 144.32, 138.05, 137.54, 137.34, 135.09, 134.71, 134.50, 133.99, 130.54, 130.23, 129.67, 129.30, 128.87, 128.57, 127.27, 127.04, 117.35, 116.54, 113.42, 113.25, 52.33, 33.95, 25.34, 20.08. HRMS (ESI-TOF) *m/z* calc'd for C<sub>33</sub>H<sub>28</sub>N<sub>3</sub>O<sub>3</sub> [M+H]<sup>+</sup>: 514.2125; found: 514.2137.

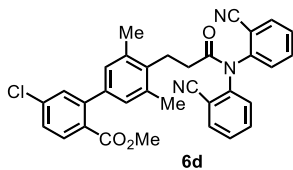

#### Methyl 4'-(3-(bis(2-cyanophenyl)amino)-3-oxopropyl)-5-chloro-3',5'-dimethyl-[1,1'-biphenyl]-2-carboxylate (**6d**)

Substrate arene was arylated following the general procedure. After purification by preparative TLC (hexanes/EtOAc = 2:1 v/v), compound **6d** (27.1 mg) was obtained in 49% yield as a colorless oil.

<sup>1</sup>H NMR (600 MHz, CDCl<sub>3</sub>) δ 7.79 (d, *J* = 7.7 Hz, 2H), 7.73 (d, *J* = 2.3 Hz, 1H), 7.72–7.38 (m, 6H), 7.44 (dd, *J* = 8.2, 2.3 Hz, 1H), 7.26 (d, *J* = 8.2 Hz, 1H), 6.88 (s, 2H), 3.67 (s, 3H), 3.14 (t, *J* = 8.5 Hz, 2H), 2.48 (d, *J* = 29.5 Hz, 2H), 2.25 (s, 6H); <sup>13</sup>C NMR (151 MHz, CDCl<sub>3</sub>) δ 172.29, 168.18, 144.49, 144.36, 140.79, 137.95, 136.72, 136.55, 135.10, 134.73, 134.47, 133.99, 133.15, 132.31, 132.23, 131.34, 130.59, 129.76, 129.67, 129.32, 128.54, 128.25, 117.34, 116.56, 113.42, 113.30, 52.49, 33.93, 25.44, 19.96. HRMS (ESI-TOF) *m/z* calc'd for C<sub>33</sub>H<sub>27</sub>ClN<sub>3</sub>O<sub>3</sub> [M+H]<sup>+</sup>: 548.1741; found: 548.1740.

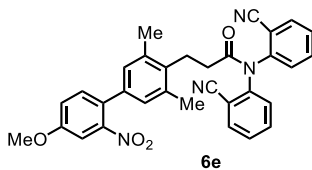

#### *N,N*-Bis(2-cyanophenyl)-3-(4'-methoxy-3,5-dimethyl-2'-nitro-[1,1'-biphenyl]-4-yl)propanamide (**6e**)

Substrate arene was arylated following the general procedure. After purification by preparative TLC (hexanes/EtOAc = 2:1 v/v), compound **6e** (24.3 mg) was obtained in 46% yield as a yellow oil.

$^1\text{H}$  NMR (600 MHz,  $\text{CDCl}_3$ )  $\delta$  7.78 (brs, 2H), 7.73–7.36 (m, 6H), 7.30 (d,  $J = 2.7$  Hz, 1H), 7.28 (d,  $J = 8.6$  Hz, 1H), 7.10 (dd,  $J = 8.6, 2.7$  Hz, 1H), 6.88 (s, 2H), 3.88 (s, 3H), 3.14 (t,  $J = 8.6$  Hz, 2H), 2.62–2.36 (m, 2H), 2.24 (s, 6H);  $^{13}\text{C}$  NMR (151 MHz,  $\text{CDCl}_3$ )  $\delta$  172.31, 159.10, 149.80, 144.46, 144.26, 137.05, 135.25, 135.13, 134.77, 134.43, 133.99, 133.00, 130.58, 129.72, 129.30, 128.63, 128.48, 127.90, 118.78, 117.29, 116.55, 113.37, 113.26, 109.13, 56.14, 33.83, 25.34, 19.99. HRMS (ESI-TOF)  $m/z$  calc'd for  $\text{C}_{32}\text{H}_{27}\text{N}_4\text{O}_4$   $[\text{M}+\text{H}]^+$ : 531.2032; found: 531.2025.

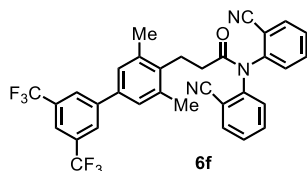

***N,N*-Bis(2-cyanophenyl)-3-(3,5-dimethyl-3',5'-bis(trifluoromethyl)-[1,1'-biphenyl]-4-yl)propanamide (6f)**

Substrate arene was arylated following the general procedure by using 0.5 ml HFIP. After purification by preparative TLC (DCM), compound **6f** (25.5 mg) was obtained in 43% yield as a white solid.

$^1\text{H}$  NMR (600 MHz,  $\text{CDCl}_3$ )  $\delta$  7.94 (s, 2H), 7.82–7.76 (m, 3H), 7.75–7.60 (m, 3H), 7.56–7.39 (m, 3H), 7.20 (s, 2H), 3.19 (t,  $J = 7.6$  Hz, 2H), 2.62–2.38 (m, 2H), 2.34 (s, 6H);  $^{13}\text{C}$  NMR (151 MHz,  $\text{CDCl}_3$ )  $\delta$  172.00, 144.47, 144.35, 143.31, 138.38, 137.80, 136.29, 135.13, 134.72, 134.53, 134.00, 132.18 (q,  $J = 33.0$  Hz), 130.53, 129.70, 129.29, 128.61, 127.23, 127.18, 123.64 (q,  $J = 272.8$  Hz), 120.91–120.76 (m), 117.36, 116.54, 113.43, 113.26, 33.87, 25.36, 20.06.  $^{19}\text{F}$  NMR (376 MHz,  $\text{CDCl}_3$ )  $\delta$  -63.11. HRMS (ESI-TOF)  $m/z$  calc'd for  $\text{C}_{33}\text{H}_{24}\text{F}_6\text{N}_3\text{O}_1$   $[\text{M}+\text{H}]^+$ : 592.1818; found: 592.1829.

## X-RAY CRYSTALLOGRAPHIC DATA

X-ray structure of **2ah**:

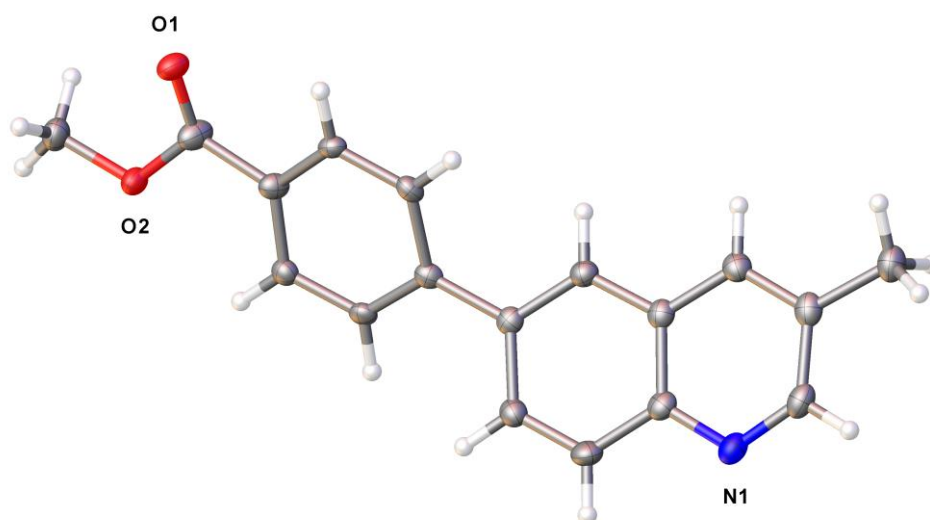

**Table 8.** Crystal data and structure refinement for **2ah**.

CCDC: 1890836

|                                 |                                                                                                           |
|---------------------------------|-----------------------------------------------------------------------------------------------------------|
| Report date                     | 2018-08-07                                                                                                |
| Identification code             | VI-154-3                                                                                                  |
| Empirical formula               | C <sub>18</sub> H <sub>16</sub> ClN O <sub>2</sub>                                                        |
| Molecular formula               | C <sub>18</sub> H <sub>15</sub> N O <sub>2</sub> , 0.5(C <sub>2</sub> H <sub>2</sub> Cl <sub>2</sub> )    |
| Formula weight                  | 319.77                                                                                                    |
| Temperature                     | 100.0 K                                                                                                   |
| Wavelength                      | 0.71073 Å                                                                                                 |
| Crystal system                  | Monoclinic                                                                                                |
| Space group                     | C 1 2/c 1                                                                                                 |
| Unit cell dimensions            | a = 18.1630(13) Å      □ = 90°.<br>b = 4.7535(4) Å      □ = 100.305(4)°.<br>c = 36.125(3) Å      □ = 90°. |
| Volume                          | 3068.7(4) Å <sup>3</sup>                                                                                  |
| Z                               | 8                                                                                                         |
| Density (calculated)            | 1.384 Mg/m <sup>3</sup>                                                                                   |
| Absorption coefficient          | 0.257 mm <sup>-1</sup>                                                                                    |
| F(000)                          | 1336                                                                                                      |
| Crystal size                    | 0.368 x 0.276 x 0.142 mm <sup>3</sup>                                                                     |
| Crystal color, habit            | Colorless Block                                                                                           |
| Theta range for data collection | 3.439 to 25.408°.                                                                                         |
| Index ranges                    | -21 ≤ h ≤ 21, -5 ≤ k ≤ 5, -43 ≤ l ≤ 43                                                                    |
| Reflections collected           | 30644                                                                                                     |
| Independent reflections         | 2813 [R(int) = 0.0635, R(sigma) = 0.0307]                                                                 |
| Completeness to theta = 25.000° | 99.8 %                                                                                                    |



|                                      |                                       |
|--------------------------------------|---------------------------------------|
| Absorption correction                | Semi-empirical from equivalents       |
| Max. and min. transmission           | 0.2590 and 0.2217                     |
| Refinement method                    | Full-matrix least-squares on $F^2$    |
| Data / restraints / parameters       | 2813 / 0 / 271                        |
| Goodness-of-fit on $F^2$             | 1.040                                 |
| Final R indices [ $I > 2\sigma(I)$ ] | R1 = 0.0390, wR2 = 0.0952             |
| R indices (all data)                 | R1 = 0.0584, wR2 = 0.1051             |
| Extinction coefficient               | n/a                                   |
| Largest diff. peak and hole          | 0.185 and -0.297 e. $\text{\AA}^{-3}$ |

# COMPUTATIONAL STUDY

## I. Mechanistic Study

### Proposed Catalytic Cycle

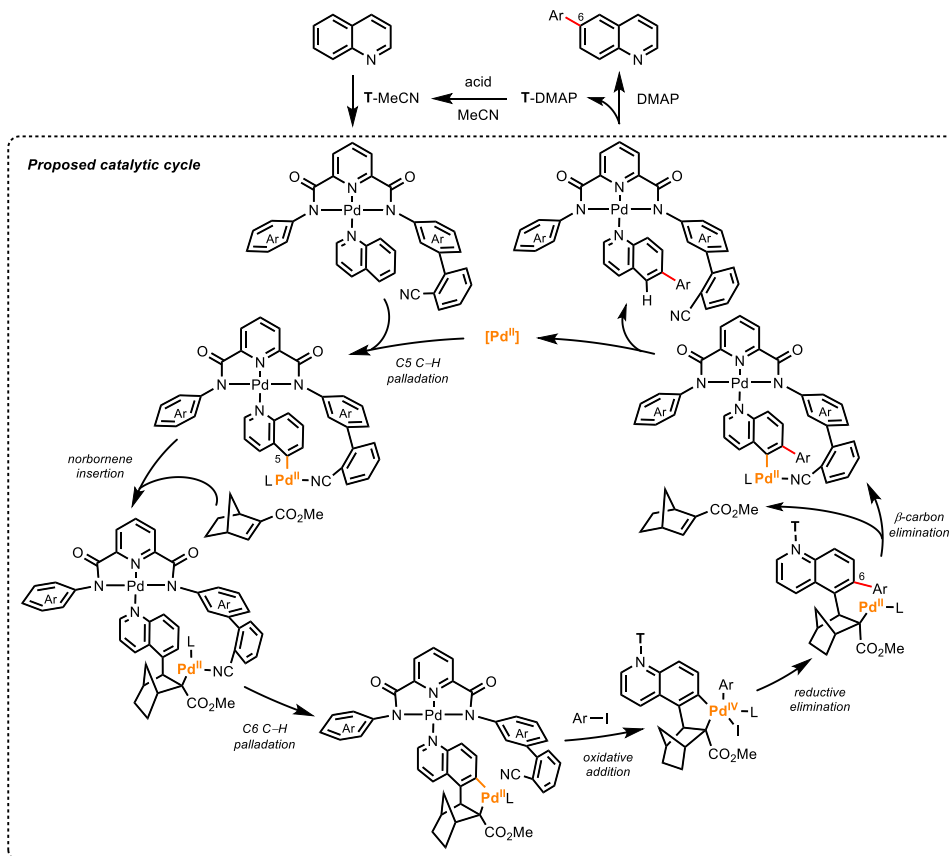

Figure 2 Proposed Catalytic Cycle

### Computational Methods

Quantum mechanical calculations were performed with Gaussian 09.<sup>7</sup> Ground state and transition state geometries were optimized in the gas phase using the B3LYP<sup>8-11</sup> functional with the 6-31G(d)<sup>12-13</sup> basis set for all nonmetal atoms and the LANL2DZ<sup>14-15</sup> basis set with effective core potential (ECP) for Pd. Single-point corrections were calculated using Truhlar's M06<sup>16</sup> functional with the 6-311++G(d,p)<sup>17</sup> basis set for all nonmetal atoms and the SDD<sup>18-19</sup> effective core potential for Pd. Single-point solvation energies were calculated by using SMD solvation model (solvent = generic, eps = 16.7, epsinf = 1.625625) to model HFIP. Vibrational frequencies were computed to determine if the optimized structures are minima or saddle points on the potential energy surface corresponding to minima and transition state geometries, respectively. The reported free energies include zero-point energies and thermal corrections calculated at 298.15 K and 1 atm. Molecular structures were illustrated with CYLview.<sup>20</sup>

### Additional Computational Discussion

Acknowledging that the Pd template T1 has many degrees of freedom, we conducted a full conformational search using MMFF in Spartan 16 to find the lowest energy conformer. Supplementary Table 9 below shows the conformers within 3 kcal mol<sup>-1</sup> of the lowest energy conformer T1\_conf\_1.

**Table 9.** Conformers of Pd Template T1

| Template conformer | Relative free energy ( $\Delta\Delta G$ ) |
|--------------------|-------------------------------------------|
| T1_conf_1          | 0.0                                       |
| T1_conf_2          | 0.4                                       |
| T1_conf_3          | 0.5                                       |
| T1_conf_4          | 1.1                                       |
| T1_conf_5          | 2.3                                       |
| T1_conf_6          | 2.5                                       |
| T1_conf_7          | 2.8                                       |

For the C5 CMD step with MPAA ligand bound bidentate, the transition state structures with and without nitrile coordination to the second Pd metal center were analyzed. The Pd template with nitrile coordination creates a pocket that positions the quinoline substrate such that the C5 position is easily accessible for CMD to take place. Without nitrile coordination, the chelation of the quinoline group is not as perpendicular to the square planar geometry of the Pd template. This causes the conformer to be 3.6 kcal mol<sup>-1</sup> higher in energy than the C5 CMD TS conformer with nitrile coordination.

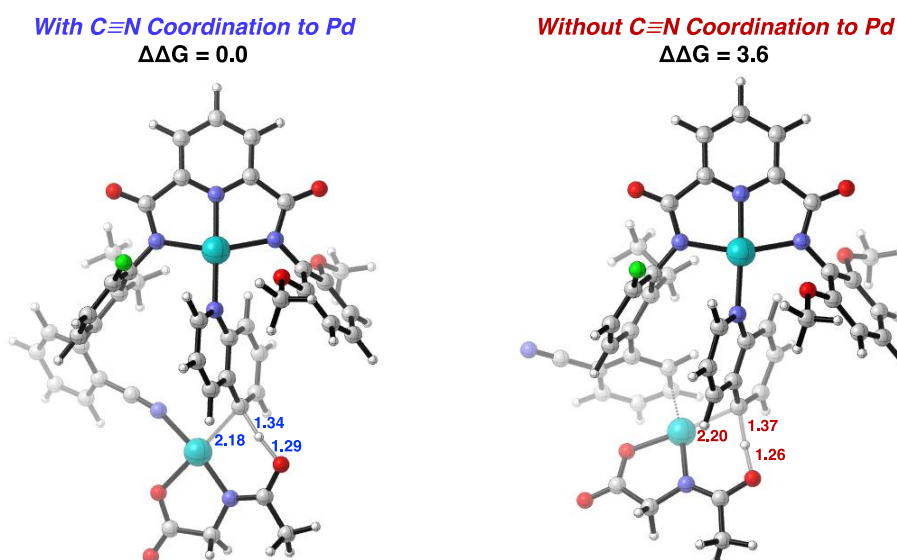**Figure 3.** C5-CMD TS Structures.

The norbornene insertion step was lowest in energy when the nitrile group of the Pd template was coordinated to the second Pd metal center, but acetate rather than MPAA ligand was involved. The large size of the MPAA ligand destabilizes the TS due to a steric clash once the norbornene inserts itself.

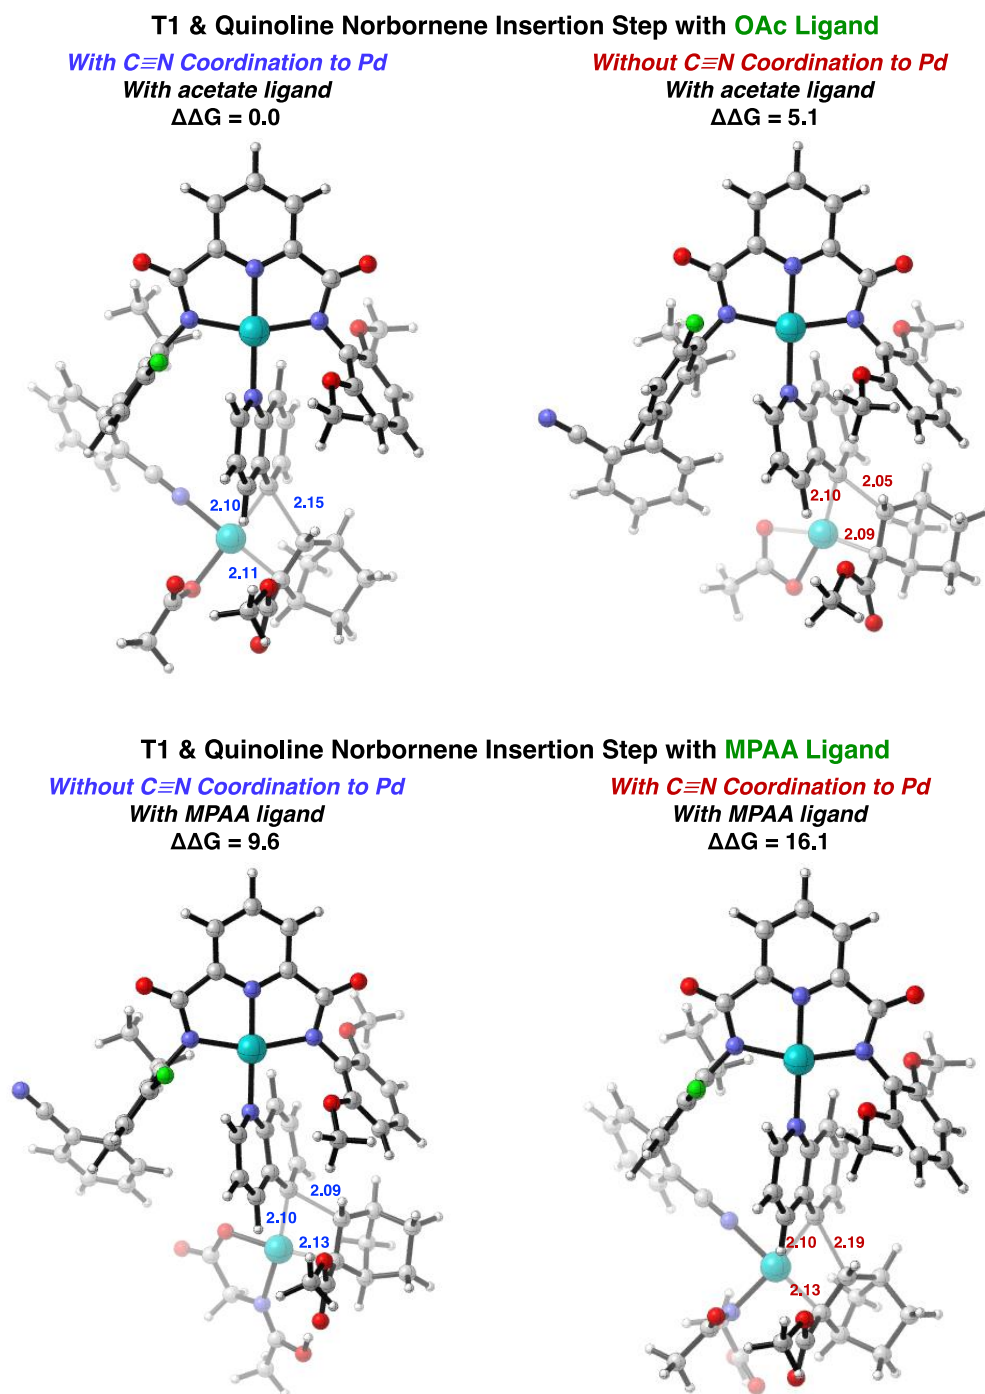

**Figure 4. Norbornene Insertion TS Structures.**

We then performed the analysis for C6-CMD step, taking into consideration if the MPAA ligand or acetate ligand acts as a base to deprotonate quinoline at the C6 position. When acetate is involved in this step, there is an open coordination site at the second Pd metal center. The nitrile coordination, which stabilized the C5 CMD step, does not assist in C6 CMD. Rather, the vacancy created when the nitrile group is rotated away from the palladacycle stabilizes this TS by a surprisingly large amount of 9.3 kcal mol<sup>-1</sup>.

If MPAA ligand is involved, both possibilities of nitrile coordinated or not coordinated to Pd are energetically higher than if acetate participates. We explored various binding modes of the MPAA ligand and the ones shown in Fig. S4 where the deprotonated NHAc is coordinated bidentate to the second Pd metal center were lowest in energy. With that, we protonated the carboxylic position to maintain the overall neutrality of the TS structures. Regardless, the involvement of MPAA destabilized the overall TS at this particular step. Overall, the lowest energy TS system for C6 CMD included an acetate ligand and did not have nitrile coordination of the Pd template.

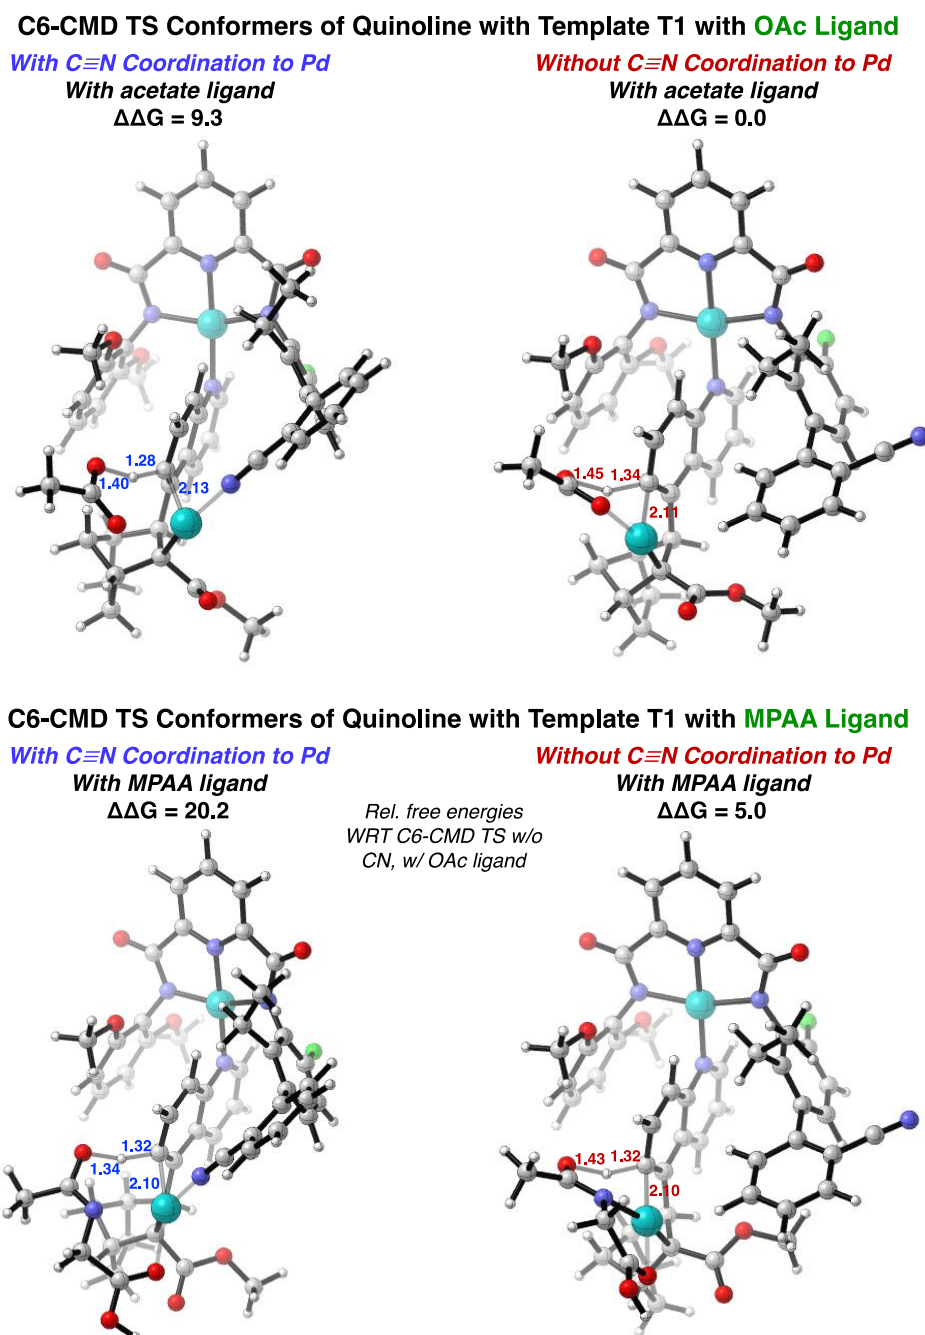

Figure 5. C6 CMD TS Structures.

Then, we analyzed the  $\beta$ -carbon elimination step and found that the nitrile group of the Pd template swings back to coordinate and stabilize this step. Furthermore, an acetate ligand prefers to coordinate in a monodentate fashion at the same Pd center, rather than a more bulky MPAA ligand. If the nitrile group is not coordinated to Pd, the ligand (either acetate or MPAA) must chelate in a bidentate way to compensate for the open coordination site. Both these conformers were higher in energy than the TS with both acetate and nitrile coordination.

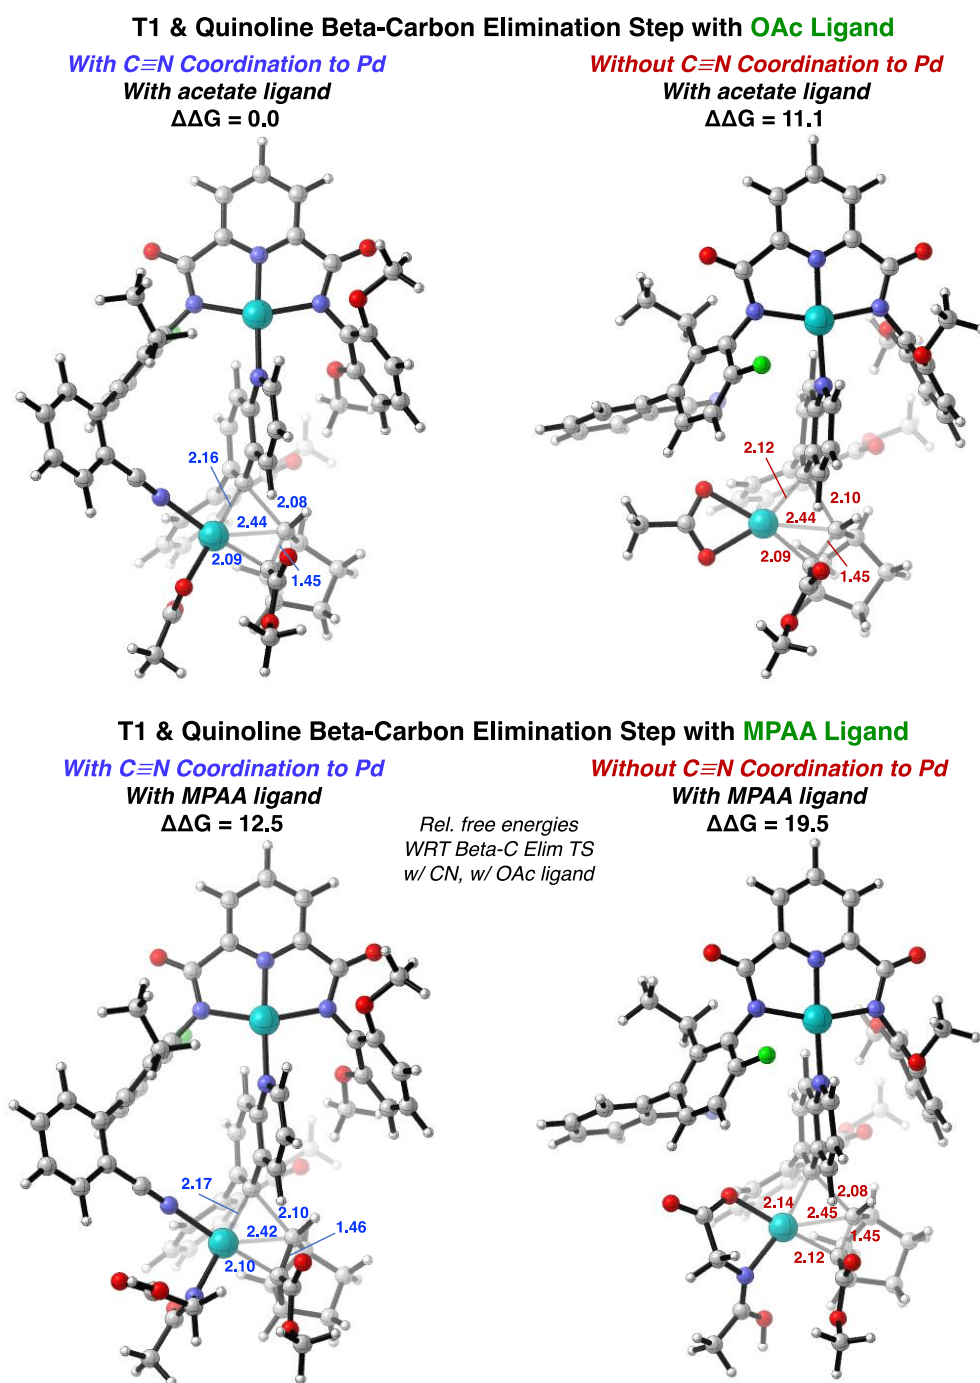

**Figure 6.  $\beta$ -Carbon Elimination TS Structures.**

Then, the catalytic cycle excluding well-established steps of oxidative addition and reductive elimination was

calculated. The free energy profile consists of the following steps: C5 CMD, norbornene insertion, C6 CMD, and  $\beta$ -carbon elimination.

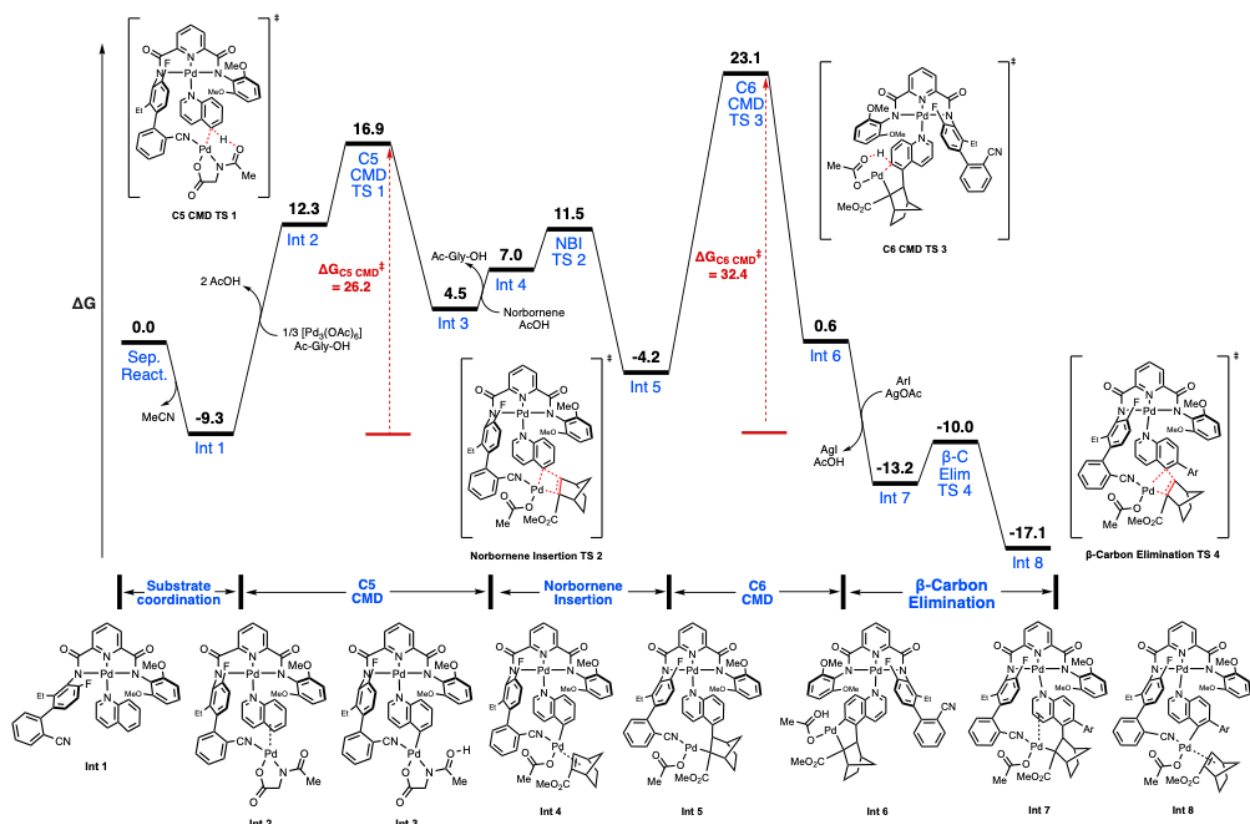

Figure 7. Free Energy Profile of Pd-catalyzed C6-Arylation of Quinoline.

Table 10. Energies, and vibrational frequencies

| Filename                       | E(sol)     | ZPVE     | TCE      | TCH      | TCCG      | Negative Freq (cm <sup>-1</sup> ) |
|--------------------------------|------------|----------|----------|----------|-----------|-----------------------------------|
| Ac-Gly-OH                      | -874.02003 | 0.237203 | 0.256576 | 0.25752  | 0.181019  |                                   |
| AcOH                           | -229.04167 | 0.062031 | 0.066592 | 0.067536 | 0.034811  |                                   |
| AgOAc2                         | -750.96935 | 0.103425 | 0.11704  | 0.117985 | 0.056858  |                                   |
| AgI                            | -158.45942 | 0.000427 | 0.003368 | 0.004312 | -0.025826 |                                   |
| C5_CMD_with_CN_TS              | -2869.5246 | 0.707651 | 0.760858 | 0.761802 | 0.61667   | -1229.267                         |
| C5_CMD_without_CN_TS           | -2869.5314 | 0.707461 | 0.760764 | 0.761708 | 0.617752  | -1425.236                         |
| Norbornene_Ins_with_CN_OAc_TS  | -3162.0219 | 0.855883 | 0.915885 | 0.91683  | 0.75848   | -184.593                          |
| Norbornene_Ins_no_CN_OAc_TS    | -3162.0108 | 0.855082 | 0.91577  | 0.916714 | 0.755537  | -242.133                          |
| Norbornene_Ins_with_CN_MPAA_TS | -3369.9552 | 0.91192  | 0.975987 | 0.976931 | 0.809409  | -146.811                          |
| Norbornene_Ins_no_CN_MPAA_TS   | -3369.9612 | 0.912023 | 0.976113 | 0.977058 | 0.808693  | -213.709                          |



|                                |            |          |          |          |          |           |
|--------------------------------|------------|----------|----------|----------|----------|-----------|
| C6_CMD_with_CN_with_MPAA_TS    | -3369.9263 | 0.908548 | 0.971855 | 0.972799 | 0.808906 | -1217.375 |
| C6_CMD_with_CN_with_OAc_TS     | -3161.9858 | 0.852392 | 0.912238 | 0.913182 | 0.755579 | -964.686  |
| C6_CMD_without_CN_with_MPAA_TS | -3369.9557 | 0.908135 | 0.972009 | 0.972953 | 0.806081 | -1146.339 |
| C6_CMD_without_CN_with_OAc_TS  | -3161.9978 | 0.851537 | 0.911815 | 0.91276  | 0.752827 | -1165.361 |
| Beta_C_elim_no_CN_OAc_TS       | -3620.7563 | 0.980013 | 1.049413 | 1.050357 | 0.873205 | -209.079  |
| Beta_C_elim_with_CN_MPAA_TS    | -3828.7182 | 1.036564 | 1.109813 | 1.110757 | 0.92453  | -204.501  |
| Beta_C_elim_with_CN_OAc_TS     | -3620.7735 | 0.980156 | 1.049552 | 1.050496 | 0.872615 | -216.119  |
| Beta_C_elim_without_CN_MPAA_TS | -3828.7049 | 1.035579 | 1.109324 | 1.110268 | 0.922473 | -207.065  |
| Cat_3Pd                        | -1754.4707 | 0.316132 | 0.350767 | 0.351712 | 0.24407  |           |
| Int_1                          | -2305.8326 | 0.614953 | 0.658603 | 0.659548 | 0.534769 |           |
| Int_2                          | -2869.5384 | 0.713205 | 0.766733 | 0.767677 | 0.623288 |           |
| Int_3                          | -2869.549  | 0.713138 | 0.766674 | 0.767618 | 0.621448 |           |
| Int_4                          | -3162.0264 | 0.855896 | 0.916816 | 0.917761 | 0.755845 |           |
| Int_5                          | -3162.0501 | 0.858244 | 0.918262 | 0.919206 | 0.761626 |           |
| Int_6                          | -3162.0438 | 0.859058 | 0.918799 | 0.919743 | 0.762945 |           |
| Int_7                          | -3620.7787 | 0.982205 | 1.051914 | 1.052858 | 0.872689 |           |
| Int_8                          | -3620.7829 | 0.980116 | 1.050412 | 1.051356 | 0.870748 |           |
| MeCN                           | -132.70646 | 0.045592 | 0.049187 | 0.050131 | 0.022612 |           |
| Methyl-2-iodobenzoate          | -470.73375 | 0.13335  | 0.143785 | 0.144729 | 0.09483  |           |
| NBE-CO2_Me                     | -500.42135 | 0.197253 | 0.206944 | 0.207888 | 0.161713 |           |
| Quinoline                      | -401.73246 | 0.136138 | 0.142786 | 0.14373  | 0.105017 |           |
| T1_conf_1                      | -2036.7872 | 0.524204 | 0.564401 | 0.565345 | 0.447737 |           |
| T1_conf_2                      | -2036.787  | 0.524258 | 0.564495 | 0.565439 | 0.448142 |           |
| T1_conf_3                      | -2036.7884 | 0.524442 | 0.564453 | 0.565397 | 0.44982  |           |
| T1_conf_4                      | -2036.7877 | 0.524483 | 0.564495 | 0.565439 | 0.449915 |           |
| T1_conf_5                      | -2036.783  | 0.524091 | 0.564395 | 0.56534  | 0.44714  |           |
| T1_conf_6                      | -2036.783  | 0.524122 | 0.564385 | 0.56533  | 0.44761  |           |
| T1_conf_7                      | -2036.7826 | 0.524175 | 0.564424 | 0.565369 | 0.44753  |           |

E(sol)= Single-point solvation energies; ZPVE = zero-point vibrational energy; TCE = thermal correction to energy; TCH = thermal correction to enthalpy; TCG = thermal correction to Gibbs free energy.

### Cartesian Coordinates

#### Ac-Gly-OH

C 3.298605 0.952855 -0.006715  
C 1.849710 0.524035 -0.004498  
O 1.019646 1.545079 -0.003457  
O 1.511892 -0.661185 -0.004338

H 3.479272 1.592226 0.867442  
H 3.475846 1.592272 -0.881637  
N 4.168430 -0.197639 -0.007571  
H 3.731995 -1.109127 -0.010600  
C 5.524575 -0.035926 0.003195



O 6.038450 1.076450 0.011158  
 C 6.344675 -1.316639 0.004022  
 H 6.988533 -1.318986 0.888869  
 H 5.741533 -2.230181 -0.001458  
 H 6.997437 -1.314531 -0.874308  
 H 0.070103 1.220157 -0.002132  
 C -3.298608 -0.952845 0.002127  
 C -1.849696 -0.524064 0.000522  
 O -1.019673 -1.545137 -0.000866  
 O -1.511850 0.661149 0.000195  
 H -3.476431 -1.592414 0.876779  
 H -3.478725 -1.592053 -0.872303  
 N -4.168398 0.197673 0.003258  
 H -3.731948 1.109158 0.003975  
 C -5.524583 0.035957 0.001557  
 O -6.038494 -1.076430 -0.000365  
 C -6.344674 1.316676 0.001966  
 H -6.994669 1.315434 0.882325  
 H -5.741512 2.230217 0.004508  
 H -6.991313 1.318160 -0.880875  
 H -0.070135 -1.220270 -0.002063

#### AcOH

C -0.093132 0.126913 0.000113  
 O -0.644944 1.203769 -0.000163  
 O -0.776729 -1.047830 0.000066  
 H -1.722949 -0.810618 -0.000043  
 C 1.396241 -0.110063 0.000021  
 H 1.916730 0.847712 -0.000200  
 H 1.680406 -0.693021 -0.882132  
 H 1.680545 -0.692686 0.882351

#### AgOAC2

Ag -1.115769 -0.002382 0.000004  
 C 1.520167 0.012721 -0.000010  
 O 0.930032 1.134620 -0.000021  
 O 0.922444 -1.108910 -0.000022  
 C 3.043495 -0.010103 0.000014  
 H 3.450642 1.001748 -0.000354  
 H 3.394382 -0.555936 -0.881533  
 H 3.394344 -0.555240 0.882011

#### AgI

Ag 0.00000000 0.00000000 -1.40890500  
 I 0.00000000 0.00000000 1.24940700

#### C5\_CMD\_with\_CN\_TS

Pd 2.846690 -0.065442 0.365816  
 C 5.035556 1.701610 -0.041849  
 C 5.471154 -0.564541 -0.585708  
 C 6.330762 2.069254 -0.392518  
 C 6.777522 -0.256333 -0.955630  
 H 6.618722 3.110789 -0.302675  
 H 7.416968 -1.055709 -1.313485  
 N 4.675006 0.417357 -0.149825  
 H 8.218896 1.336410 -1.131066  
 C 7.202945 1.073149 -0.850583  
 N 3.549081 -1.921021 -0.174399  
 N 2.775789 1.985246 0.669387  
 C 4.829260 -1.940408 -0.648549  
 C 3.944290 2.643095 0.438138  
 O 5.464838 -2.898937 -1.080998  
 O 4.170120 3.849944 0.550021  
 C 2.720770 -3.048685 -0.255188

C 2.306635 -3.560050 -1.502247  
 C 2.158988 -3.589350 0.919684  
 C 1.392347 -4.617891 -1.574043  
 C 1.222831 -4.628417 0.851614  
 C 0.858710 -5.136096 -0.395392  
 H 1.076294 -5.017996 -2.529643  
 H 0.785612 -5.046751 1.749773  
 H 0.137889 -5.947054 -0.448582  
 C 1.613275 2.665504 1.072886  
 C 0.691923 3.194649 0.142746  
 C 1.283669 2.694454 2.432538  
 C -0.506106 3.762918 0.622556  
 C 0.096507 3.225495 2.911416  
 C -0.798754 3.769819 1.993227  
 H -0.106127 3.213846 3.976982  
 H -1.729436 4.209191 2.340097  
 O 2.809214 -2.905509 -2.588422  
 O 2.576641 -3.008485 2.083130  
 C 2.521830 -3.421341 -3.876254  
 H 2.871071 -4.456626 -3.982407  
 H 1.445867 -3.379559 -4.099657  
 H 3.060830 -2.784425 -4.580164  
 C 2.011254 -3.465489 3.299414  
 H 2.476605 -2.868365 4.086365  
 H 0.923224 -3.310871 3.320746  
 H 2.229167 -4.527287 3.475628  
 C -1.467489 4.429161 -0.307775  
 C -1.303847 5.780364 -0.634253  
 C -2.580109 3.757229 -0.858723  
 C -2.203265 6.438219 -1.474745  
 H -0.459125 6.315274 -0.211989  
 C -3.495191 4.416815 -1.703123  
 C -3.301058 5.758355 -2.010028  
 H -2.049258 7.487927 -1.708062  
 H -4.346188 3.870483 -2.097323  
 H -4.004255 6.271395 -2.658551  
 C 1.005697 3.131309 -1.336505  
 H 1.582335 2.220226 -1.528619  
 H 0.072465 3.046217 -1.905306  
 C 1.804560 4.348750 -1.840285  
 H 1.206957 5.263816 -1.766599  
 H 2.713395 4.487863 -1.249052  
 H 2.083057 4.213017 -2.891896  
 F 2.148008 2.137824 3.312662  
 C -2.837113 2.379518 -0.583313  
 N -3.151576 1.273260 -0.440631  
 C -0.064762 -0.965280 0.063229  
 C 0.600830 -0.467961 2.244927  
 C 0.251357 -1.080164 -1.315370  
 C -1.389445 -1.259964 0.502675  
 C -0.671069 -0.784589 2.759263  
 H 1.392494 -0.119184 2.897257  
 C -0.715263 -1.469303 -2.217645  
 H 1.269411 -0.886144 -1.637576  
 C -2.404164 -1.613399 -0.449023  
 C -1.662575 -1.177922 1.888979  
 H -0.847559 -0.700371 3.826135  
 C -2.035545 -1.724856 -1.787567  
 H -0.454460 -1.574422 -3.267119  
 H -2.660985 -1.420925 2.241192  
 H -2.783404 -2.020375 -2.519393  
 N 0.898844 -0.560036 0.954970  
 Pd -4.246061 -0.469822 -0.201064  
 H -3.232082 -2.581562 -0.044853

C -7.053782 -0.014470 0.043973  
O -8.155900 0.501511 0.086776  
O -5.928977 0.656292 -0.068007  
N -5.532928 -1.980786 0.082680  
C -5.168504 -3.227826 0.297813  
C -6.208173 -4.293667 0.578763  
H -5.718002 -5.265773 0.635302  
H -6.717124 -4.089571 1.527820  
H -6.972121 -4.310583 -0.205488  
O -3.943742 -3.601700 0.286041  
C -6.929049 -1.549004 0.122000  
H -7.424884 -1.870682 1.046001  
H -7.498767 -1.969524 -0.717100

**C5\_CMD\_without\_CN\_TS**

Pd 2.797750 0.431934 0.452641  
C 4.310731 2.822395 0.186003  
C 5.506743 0.826631 -0.277274  
C 5.441335 3.594829 -0.060717  
C 6.668215 1.547550 -0.540334  
H 5.364747 4.672579 0.031541  
H 7.561916 1.004356 -0.826998  
N 4.399392 1.491519 0.069463  
H 7.521353 3.525174 -0.622191  
C 6.626430 2.942115 -0.424176  
N 4.106514 -1.088765 0.009755  
N 2.031361 2.347930 0.694704  
C 5.356380 -0.682950 -0.365352  
C 2.930657 3.355838 0.539116  
O 6.301720 -1.377845 -0.729554  
O 2.732283 4.568958 0.610130  
C 3.700590 -2.422900 -0.121361  
C 3.626077 -3.041009 -1.386950  
C 3.218851 -3.124276 1.003478  
C 3.149464 -4.350844 -1.518377  
C 2.714324 -4.424086 0.872645  
C 2.699626 -5.026701 -0.385220  
H 3.107575 -4.833380 -2.487553  
H 2.349525 -4.970197 1.733900  
H 2.321977 -6.040528 -0.484403  
C 0.657801 2.564560 0.912182  
C -0.264935 2.502219 -0.157132  
C 0.169354 2.633278 2.220082  
C -1.645320 2.437061 0.138238  
C -1.186578 2.643279 2.515927  
C -2.092480 2.527217 1.467042  
H -1.509925 2.701131 3.549632  
H -3.156826 2.477533 1.674372  
O 3.985015 -2.247005 -2.436051  
O 3.272484 -2.438049 2.183300  
C 4.154836 -2.848103 -3.708718  
H 4.878401 -3.672109 -3.667451  
H 3.203633 -3.222733 -4.114055  
H 4.537917 -2.061717 -4.361655  
C 2.734733 -3.052783 3.340696  
H 2.870893 -2.333165 4.150707  
H 1.663130 -3.268242 3.221371  
H 3.263766 -3.981411 3.593007  
C -2.652132 2.163349 -0.920761  
C -2.518612 0.989118 -1.707992  
C -3.763026 2.985144 -1.168132  
C -3.439513 0.680377 -2.727079  
H -1.602464 0.421083 -1.617539  
C -4.697379 2.656572 -2.176171

C -4.535893 1.524417 -2.957883  
H -3.261312 -0.179922 -3.365377  
H -5.547541 3.312337 -2.330723  
H -5.258991 1.286891 -3.730774  
C 0.273285 2.598886 -1.569853  
H 1.222229 2.057008 -1.633181  
H -0.406422 2.137453 -2.288881  
C 0.490230 4.072723 -1.971817  
H -0.462781 4.614475 -1.966275  
H 1.167576 4.573235 -1.274498  
H 0.913290 4.134687 -2.981406  
F 1.057761 2.626993 3.236654  
C -3.962405 4.195220 -0.423883  
N -4.144051 5.187491 0.154269  
C 0.195666 -1.166039 0.020316  
C 0.646135 -0.507666 2.212637  
C 0.639303 -1.366541 -1.313459  
C -1.138380 -1.531391 0.373662  
C -0.620355 -0.934026 2.656687  
H 1.344200 -0.041300 2.898601  
C -0.216073 -1.911494 -2.250786  
H 1.659954 -1.105295 -1.573538  
C -2.058826 -1.979309 -0.636930  
C -1.518486 -1.417713 1.735215  
H -0.876446 -0.832129 3.705420  
C -1.560589 -2.197579 -1.918834  
H 0.145319 -2.094743 -3.258769  
H -2.521536 -1.710320 2.028102  
H -2.227828 -2.573406 -2.691215  
N 1.040892 -0.608232 0.950330  
Pd -3.870289 -0.734983 -0.509461  
H -2.955145 -2.899637 -0.173365  
C -6.398438 0.086810 0.549766  
O -7.380302 0.744843 0.834649  
O -5.421625 0.524687 -0.217616  
N -5.005506 -1.966101 0.626468  
C -4.723801 -3.235754 0.826288  
C -5.679954 -4.123215 1.595901  
H -5.222615 -5.102093 1.740492  
H -5.928349 -3.683422 2.567355  
H -6.616744 -4.240716 1.039317  
O -3.647315 -3.782936 0.394790  
C -6.247139 -1.347082 1.089869  
H -6.280540 -1.294981 2.185877  
H -7.125987 -1.916065 0.762510

**C6\_CMD\_with\_CN\_with\_MPA TS**

Pd 3.638022 -0.539706 0.422506  
C 5.839268 1.034724 -0.423605  
C 5.696064 -1.113678 -1.426135  
C 7.021657 1.308699 -1.104262  
C 6.868809 -0.889923 -2.142934  
H 7.494841 2.273801 -0.961190  
H 7.216675 -1.659189 -2.823528  
N 5.253216 -0.154694 -0.606301  
H 8.455280 0.522042 -2.508667  
C 7.535913 0.327965 -1.963351  
N 3.764611 -2.293365 -0.641724  
N 3.898471 1.473448 0.906597  
C 4.780847 -2.325851 -1.552641  
C 5.059541 2.015559 0.441015  
O 4.997178 -3.167720 -2.420541  
O 5.484229 3.161213 0.602160  
C 2.606933 -3.079557 -0.797222

C 1.631506 -2.728618 -1.759354  
 C 2.302736 -4.090208 0.134545  
 C 0.398814 -3.393331 -1.806740  
 C 1.076444 -4.767053 0.084416  
 C 0.142354 -4.409175 -0.887819  
 H -0.366314 -3.101201 -2.515734  
 H 0.842907 -5.552869 0.792195  
 H -0.811853 -4.927353 -0.926218  
 C 2.822953 2.244703 1.374365  
 C 2.087365 3.136996 0.550608  
 C 2.319067 1.957625 2.653163  
 C 0.926085 3.749445 1.078155  
 C 1.149033 2.506438 3.148923  
 C 0.457873 3.421288 2.356298  
 H 0.808517 2.230423 4.141117  
 H -0.439622 3.899228 2.738087  
 O 1.960615 -1.682266 -2.565124  
 O 3.260629 -4.311670 1.084212  
 C 1.052437 -1.323744 -3.602172  
 H 0.922462 -2.149847 -4.313549  
 H 0.070992 -1.029772 -3.211189  
 H 1.513062 -0.475760 -4.112879  
 C 3.027575 -5.329106 2.040767  
 H 3.912148 -5.345917 2.680974  
 H 2.139882 -5.113530 2.652682  
 H 2.905634 -6.312523 1.566908  
 C 0.230098 4.848682 0.337664  
 C 0.829594 6.116899 0.319169  
 C -1.026476 4.720996 -0.298686  
 C 0.231898 7.205854 -0.313337  
 H 1.782394 6.237441 0.824087  
 C -1.631864 5.820710 -0.942022  
 C -1.002106 7.058409 -0.952294  
 H 0.728928 8.171742 -0.303617  
 H -2.593673 5.684773 -1.426530  
 H -1.471730 7.901742 -1.449251  
 C 2.456473 3.306556 -0.913394  
 H 2.960253 2.387909 -1.235500  
 H 1.527543 3.368539 -1.495158  
 C 3.351279 4.508574 -1.274041  
 H 2.805676 5.451437 -1.181533  
 H 4.232707 4.542195 -0.631851  
 H 3.684156 4.420833 -2.315169  
 F 2.987637 1.067287 3.418385  
 C -1.765120 3.494835 -0.330029  
 N -2.463512 2.571633 -0.424193  
 C 0.723326 -0.878705 0.958777  
 C 2.062710 -1.838209 2.616568  
 C 0.642142 -0.014995 -0.163096  
 C -0.447658 -1.515711 1.477528  
 C 0.954097 -2.461839 3.214229  
 H 3.062755 -1.958235 3.015394  
 C -0.564665 0.192765 -0.758342  
 H 1.548232 0.446268 -0.536300  
 C -1.692439 -1.323189 0.799788  
 C -0.288798 -2.317566 2.633868  
 H 1.095607 -3.059882 4.108015  
 C -1.746861 -0.483027 -0.322865  
 H -0.644893 0.846556 -1.620742  
 H -1.148546 -2.820870 3.062851  
 H -2.329826 -0.749566 -1.481808  
 N 1.949588 -1.094005 1.523690  
 Pd -3.542798 0.599782 -0.151452  
 C -5.669393 -3.200998 0.897138

C -4.987306 -2.195373 -0.076379  
 C -3.241090 -3.387348 0.748718  
 C -4.453630 -3.968584 1.516222  
 H -6.300779 -2.710884 1.639263  
 H -6.309266 -3.880135 0.321744  
 H -4.369572 -3.814242 2.598762  
 H -4.535105 -5.048022 1.348363  
 C -3.859081 -3.094170 -0.632841  
 H -3.177297 -2.604314 -1.323941  
 H -4.253682 -3.996857 -1.115548  
 C -4.215879 -1.155025 0.768834  
 C -2.973240 -1.952363 1.286966  
 H -5.673219 -1.753684 -0.800893  
 H -2.348973 -4.019592 0.754692  
 H -2.975719 -1.950000 2.380773  
 C -5.045235 -0.460597 1.806458  
 O -6.246418 -0.266981 1.729301  
 O -4.308015 -0.017417 2.865037  
 C -5.034439 0.758100 3.826897  
 H -5.855979 0.176561 4.255896  
 H -4.309399 1.025134 4.597032  
 H -5.446867 1.657686 3.359636  
 C -6.310688 1.228488 -1.453926  
 O -7.622510 1.485094 -1.574330  
 O -5.702048 1.534812 -0.438877  
 N -4.344411 0.335562 -2.575731  
 C -3.775440 -0.724443 -3.077973  
 C -4.476143 -1.745658 -3.964958  
 H -3.724831 -2.314949 -4.515838  
 H -5.044077 -2.451157 -3.344250  
 H -5.170275 -1.281350 -4.672688  
 O -2.536919 -1.004332 -2.784032  
 C -5.756701 0.544138 -2.698835  
 H -6.371273 -0.363112 -2.832341  
 H -6.017060 1.205231 -3.542170  
 H -7.913368 1.867823 -0.724101

**C6\_CMD\_with\_CN\_with\_OAc\_TS**

Pd -3.219051 -0.677599 -0.567476  
 C -5.534451 0.802526 0.133310  
 C -5.365248 -1.339050 1.145947  
 C -6.769614 1.024370 0.734659  
 C -6.590538 -1.166659 1.784728  
 H -7.273753 1.968247 0.559391  
 H -6.948483 -1.950712 2.442853  
 N -4.911131 -0.360971 0.355219  
 H -8.256742 0.175272 2.043757  
 C -7.296288 0.021497 1.559913  
 N -3.338035 -2.434836 0.490930  
 N -3.527453 1.330704 -1.059797  
 C -4.408754 -2.510206 1.334932  
 C -4.743036 1.817625 -0.679067  
 O -4.642778 -3.359580 2.190505  
 O -5.208469 2.941666 -0.874662  
 C -2.159744 -3.168801 0.728384  
 C -1.259805 -2.763381 1.741808  
 C -1.759632 -4.182674 -0.162744  
 C -0.008066 -3.378607 1.878044  
 C -0.513876 -4.809689 -0.023740  
 C 0.343585 -4.399599 0.997102  
 H 0.697336 -3.048365 2.630933  
 H -0.206945 -5.597417 -0.700611  
 H 1.311690 -4.881388 1.104808  
 C -2.460440 2.154313 -1.451712

C -1.830102 3.082766 -0.580843  
 C -1.852323 1.891924 -2.689911  
 C -0.666778 3.753564 -1.027733  
 C -0.679277 2.499248 -3.103855  
 C -0.093478 3.448871 -2.268497  
 H -0.256786 2.241225 -4.069047  
 H 0.802470 3.972832 -2.588700  
 O -1.677227 -1.717793 2.506251  
 O -2.645797 -4.457800 -1.166495  
 C -0.858959 -1.320529 3.603564  
 H -0.755012 -2.136987 4.329989  
 H 0.138800 -0.995252 3.284627  
 H -1.385028 -0.485684 4.070958  
 C -2.322556 -5.494359 -2.075370  
 H -3.165970 -5.560217 -2.765897  
 H -1.407021 -5.267503 -2.640832  
 H -2.197419 -6.458381 -1.564245  
 C -0.082184 4.888263 -0.245483  
 C -0.763637 6.114452 -0.249777  
 C 1.148040 4.839027 0.451659  
 C -0.271797 7.233955 0.419589  
 H -1.694705 6.178202 -0.803176  
 C 1.646848 5.969720 1.132130  
 C 0.935525 7.162430 1.119530  
 H -0.830494 8.165103 0.390309  
 H 2.590949 5.893383 1.662320  
 H 1.322560 8.029909 1.645102  
 C -2.304231 3.226826 0.855770  
 H -2.770089 2.277607 1.145289  
 H -1.420594 3.344062 1.496521  
 C -3.293184 4.369458 1.159914  
 H -2.800126 5.344028 1.114132  
 H -4.127527 4.358572 0.457072  
 H -3.692768 4.249734 2.173994  
 F -2.417838 0.967591 -3.496334  
 C 1.966363 3.666334 0.505724  
 N 2.721172 2.790390 0.617074  
 C -0.266771 -0.885643 -0.901717  
 C -1.437502 -1.947838 -2.623042  
 C -0.311131 0.007869 0.197311  
 C 0.967260 -1.480985 -1.315423  
 C -0.261611 -2.540312 -3.116823  
 H -2.398621 -2.124145 -3.090879  
 C 0.836594 0.289049 0.874012  
 H -1.263635 0.430953 0.490301  
 C 2.151015 -1.198573 -0.564755  
 C 0.927004 -2.325841 -2.452137  
 H -0.311709 -3.171565 -3.997435  
 C 2.078435 -0.322767 0.530968  
 H 0.821542 0.960379 1.726210  
 H 1.835389 -2.807258 -2.798526  
 H 2.657118 -0.500856 1.657091  
 N -1.438102 -1.171437 -1.547777  
 Pd 3.825238 0.892050 0.376731  
 O 4.596620 0.541982 2.859702  
 O 2.735063 -0.719533 3.040751  
 C 3.782568 -0.130062 3.521323  
 C 3.993327 -0.329176 5.018483  
 H 4.190438 -1.388634 5.219313  
 H 4.833184 0.272730 5.371789  
 H 3.081297 -0.061475 5.562506  
 C 6.288294 -2.658507 -0.407120  
 C 5.462094 -1.716099 0.516562  
 C 3.890481 -3.123985 -0.334954

C 5.195694 -3.598659 -1.022718  
 H 6.861796 -2.122878 -1.170298  
 H 7.004328 -3.224526 0.198699  
 H 5.144436 -3.515571 -2.114280  
 H 5.395839 -4.648380 -0.782954  
 C 4.410847 -2.710257 1.056971  
 H 3.662225 -2.262031 1.707442  
 H 4.878629 -3.545509 1.592021  
 C 4.618702 -0.817293 -0.414514  
 C 3.504344 -1.752644 -0.959770  
 H 6.043138 -1.161425 1.253756  
 H 3.073148 -3.850057 -0.351606  
 H 3.569019 -1.801332 -2.050733  
 C 5.379067 0.038769 -1.367692  
 O 5.933828 1.070100 -0.968051  
 O 5.375315 -0.326883 -2.657337  
 C 6.024227 0.583742 -3.569256  
 H 7.078524 0.699877 -3.305593  
 H 5.919403 0.129987 -4.554810  
 H 5.536732 1.561730 -3.537232

**C6\_CMD\_without\_CN\_with\_MPAAS\_TS**

Pd 3.586518 -0.166353 0.228969  
 C 5.504460 1.210929 -1.334530  
 C 5.537031 -1.155297 -1.560816  
 C 6.548805 1.343585 -2.244408  
 C 6.581281 -1.081950 -2.478726  
 H 6.894773 2.339097 -2.499832  
 H 6.950918 -2.001211 -2.919559  
 N 5.073075 -0.019161 -1.027884  
 H 7.908559 0.260376 -3.518436  
 C 7.092443 0.180268 -2.805819  
 N 3.834800 -2.158824 -0.212301  
 N 3.746528 1.886553 0.138007  
 C 4.783534 -2.418641 -1.157873  
 C 4.708606 2.352716 -0.710588  
 O 5.057197 -3.492667 -1.687707  
 O 4.949029 3.518267 -1.026188  
 C 2.820827 -3.071053 0.119182  
 C 1.807280 -3.397512 -0.808164  
 C 2.667626 -3.486849 1.457895  
 C 0.685195 -4.139555 -0.415849  
 C 1.548050 -4.227668 1.856733  
 C 0.570165 -4.543516 0.912935  
 H -0.114079 -4.353870 -1.114955  
 H 1.428399 -4.548813 2.884143  
 H -0.304517 -5.110269 1.221010  
 C 2.714274 2.674967 0.673161  
 C 1.549911 2.999838 -0.060986  
 C 2.736796 2.941608 2.047136  
 C 0.454730 3.577841 0.617335  
 C 1.684327 3.547194 2.713936  
 C 0.539834 3.864344 1.986906  
 H 1.764280 3.742453 3.777936  
 H -0.304052 4.329569 2.487642  
 O 1.974615 -2.875065 -2.055331  
 O 3.650067 -3.067528 2.311533  
 C 1.055878 -3.258481 -3.068525  
 H 1.070691 -4.345297 -3.225752  
 H 0.030965 -2.947029 -2.830793  
 H 1.394491 -2.757875 -3.978159  
 C 3.580082 -3.480995 3.664244  
 H 4.464889 -3.064301 4.149953  
 H 2.677578 -3.094120 4.159118

H 3.598137 -4.575275 3.756100  
 C -0.844693 3.832387 -0.074081  
 C -1.648127 2.757094 -0.478485  
 C -1.332776 5.139904 -0.292449  
 C -2.883174 2.964058 -1.090366  
 H -1.304703 1.747313 -0.287236  
 C -2.583156 5.349069 -0.903367  
 C -3.354648 4.262609 -1.304092  
 H -3.489960 2.105926 -1.369425  
 H -2.933515 6.364829 -1.057173  
 H -4.322232 4.427629 -1.769034  
 C 1.516594 2.762722 -1.555225  
 H 2.221610 1.965727 -1.810013  
 H 0.524164 2.417715 -1.860948  
 C 1.882557 4.039862 -2.335730  
 H 1.172165 4.845156 -2.116870  
 H 2.884825 4.376311 -2.057224  
 H 1.862091 3.849765 -3.415480  
 F 3.814350 2.543622 2.760382  
 C -0.561974 6.283600 0.104543  
 N 0.032714 7.232985 0.417444  
 C 0.703478 -0.582765 1.011090  
 C 2.139412 -0.361002 2.841366  
 C 0.518607 -0.499588 -0.391617  
 C -0.402302 -0.887492 1.864924  
 C 1.102849 -0.647929 3.749220  
 H 3.141720 -0.133642 3.185552  
 C -0.709689 -0.768392 -0.926283  
 H 1.368393 -0.255329 -1.018555  
 C -1.687244 -1.134155 1.287053  
 C -0.155777 -0.918168 3.261393  
 H 1.311865 -0.652133 4.813422  
 C -1.827537 -1.138382 -0.112220  
 H -0.848738 -0.743417 -2.001748  
 H -0.961103 -1.158851 3.946538  
 H -2.342968 -2.108561 -0.845275  
 N 1.951316 -0.349557 1.529194  
 Pd -3.764764 -0.583864 -0.687629  
 C -5.632790 -1.585741 3.108648  
 C -5.271263 -1.578425 1.593323  
 C -3.481678 -2.586843 2.561990  
 C -4.422396 -2.333088 3.764157  
 H -5.775989 -0.572347 3.493989  
 H -6.570088 -2.129361 3.269893  
 H -3.941802 -1.747229 4.556259  
 H -4.737535 -3.284058 4.207616  
 C -4.513441 -2.921628 1.461998  
 H -4.074268 -3.095840 0.475876  
 H -5.132987 -3.787063 1.726235  
 C -4.132969 -0.565923 1.363753  
 C -2.928433 -1.190868 2.130496  
 H -6.136326 -1.427493 0.943889  
 H -2.700761 -3.331271 2.741821  
 H -2.745210 -0.597654 3.030631  
 C -4.437177 0.863328 1.636232  
 O -5.530838 1.385781 1.498052  
 O -3.337602 1.557073 2.042414  
 C -3.551339 2.949378 2.318564  
 H -4.267185 3.071548 3.137111  
 H -2.572967 3.340910 2.598326  
 H -3.925776 3.467118 1.433049  
 C -5.621295 0.062758 -2.979589  
 O -6.554213 0.540565 -3.806453  
 O -5.719140 0.171016 -1.762036

N -3.565600 -1.191311 -2.765685  
 C -3.047866 -2.395804 -2.927010  
 C -3.182121 -3.175365 -4.225385  
 H -2.534622 -4.051786 -4.182053  
 H -4.215744 -3.515939 -4.363621  
 H -2.910937 -2.564150 -5.092562  
 O -2.392087 -2.970768 -1.986254  
 C -4.456924 -0.582695 -3.719401  
 H -4.883880 -1.268094 -4.463881  
 H -3.969361 0.225512 -4.288356  
 H -7.248104 0.958804 -3.259240

**C6\_CMD\_without\_CN\_with\_OAc\_TS**

Pd 3.248961 -0.292201 0.404424  
 C 5.479083 0.812497 -0.946513  
 C 5.283617 -1.552668 -1.096587  
 C 6.631810 0.797805 -1.725458  
 C 6.431355 -1.626379 -1.881249  
 H 7.112004 1.740309 -1.964412  
 H 6.752327 -2.597183 -2.242560  
 N 4.883808 -0.352705 -0.660606  
 H 8.007340 -0.473075 -2.792464  
 C 7.109106 -0.438256 -2.182411  
 N 3.339737 -2.317640 0.068881  
 N 3.650053 1.723285 0.282046  
 C 4.367812 -2.717652 -0.734414  
 C 4.749448 2.055817 -0.445868  
 O 4.602606 -3.842674 -1.167716  
 O 5.153408 3.177777 -0.750383  
 C 2.231999 -3.130046 0.354697  
 C 1.307645 -3.483909 -0.652390  
 C 1.902721 -3.407167 1.698268  
 C 0.101943 -4.121700 -0.329215  
 C 0.697391 -4.039402 2.027973  
 C -0.187753 -4.389420 1.007300  
 H -0.626330 -4.357347 -1.095626  
 H 0.443744 -4.254994 3.058719  
 H -1.126949 -4.874995 1.259238  
 C 2.664162 2.627280 0.719511  
 C 1.563026 2.974657 -0.097138  
 C 2.633744 2.981317 2.072533  
 C 0.463235 3.638491 0.486991  
 C 1.580977 3.679559 2.643859  
 C 0.489570 4.000893 1.840917  
 H 1.617275 3.936943 3.697073  
 H -0.360232 4.523918 2.269302  
 O 1.643426 -3.087377 -1.911180  
 O 2.812771 -2.969033 2.620120  
 C 0.817247 -3.509839 -2.987516  
 H 0.783666 -4.605128 -3.055423  
 H -0.206652 -3.128624 -2.889313  
 H 1.280064 -3.105720 -3.890240  
 C 2.570349 -3.251941 3.986428  
 H 3.427476 -2.850192 4.530776  
 H 1.652012 -2.764277 4.344850  
 H 2.498217 -4.332103 4.170979  
 C -0.779160 3.905724 -0.298001  
 C -1.622665 2.845435 -0.660499  
 C -1.156646 5.211172 -0.681566  
 C -2.783550 3.063385 -1.400621  
 H -1.352914 1.836959 -0.365905  
 C -2.336049 5.433447 -1.416323  
 C -3.143309 4.360503 -1.781217  
 H -3.409731 2.220069 -1.680038

|    |           |           |           |   |           |           |           |
|----|-----------|-----------|-----------|---|-----------|-----------|-----------|
| H  | -2.598408 | 6.447039  | -1.702652 | C | -7.076403 | 1.807019  | 0.751367  |
| H  | -4.045878 | 4.531206  | -2.360784 | C | -7.449775 | -0.592250 | 0.940035  |
| C  | 1.610308  | 2.667060  | -1.577684 | H | -7.390582 | 2.840653  | 0.844589  |
| H  | 2.231181  | 1.781485  | -1.744640 | H | -8.058367 | -1.455822 | 1.184764  |
| H  | 0.609569  | 2.430703  | -1.950618 | N | -5.401498 | 0.265244  | 0.170743  |
| C  | 2.191667  | 3.853984  | -2.371185 | H | -8.910827 | 0.911182  | 1.442207  |
| H  | 1.575082  | 4.749978  | -2.236092 | C | -7.904493 | 0.725614  | 1.077341  |
| H  | 3.205227  | 4.078912  | -2.026993 | N | -4.235241 | -2.009653 | -0.255065 |
| H  | 2.226468  | 3.620073  | -3.441734 | N | -3.567716 | 2.005140  | -0.448572 |
| F  | 3.646461  | 2.568782  | 2.867520  | C | -5.484266 | -2.148941 | 0.259609  |
| C  | -0.335895 | 6.336840  | -0.336435 | C | -4.746960 | 2.579947  | -0.089927 |
| N  | 0.303387  | 7.270787  | -0.068502 | O | -6.086556 | -3.191986 | 0.520530  |
| C  | 0.261492  | -0.436525 | 0.853161  | O | -5.031467 | 3.778408  | -0.032808 |
| C  | 1.490203  | -0.093374 | 2.810141  | C | -3.322715 | -3.069633 | -0.405751 |
| C  | 0.240060  | -0.496695 | -0.561710 | C | -2.521443 | -3.476491 | 0.684940  |
| C  | -0.954463 | -0.567874 | 1.593070  | C | -3.010489 | -3.554698 | -1.685830 |
| C  | 0.335055  | -0.195700 | 3.609702  | C | -1.433985 | -4.334424 | 0.487474  |
| H  | 2.461057  | 0.108983  | 3.248288  | C | -1.934028 | -4.421351 | -1.887499 |
| C  | -0.936806 | -0.747410 | -1.212514 | C | -1.147609 | -4.795443 | -0.800587 |
| H  | 1.169979  | -0.373252 | -1.104540 | H | -0.775135 | -4.596193 | 1.305913  |
| C  | -2.175388 | -0.819626 | 0.894784  | H | -1.721383 | -4.762644 | -2.895387 |
| C  | -0.875863 | -0.441422 | 3.004877  | H | -0.294570 | -5.452092 | -0.949437 |
| H  | 0.419450  | -0.080735 | 4.684804  | C | -2.411958 | 2.740198  | -0.778660 |
| C  | -2.153535 | -0.976727 | -0.501924 | C | -1.637405 | 3.471926  | 0.155008  |
| H  | -0.949545 | -0.815944 | -2.294053 | C | -1.925018 | 2.598646  | -2.085229 |
| H  | -1.771501 | -0.541404 | 3.608264  | C | -0.380584 | 3.973292  | -0.258242 |
| H  | -2.699997 | -1.955728 | -1.228015 | C | -0.688249 | 3.064270  | -2.492260 |
| N  | 1.456659  | -0.228816 | 1.492858  | C | 0.085088  | 3.751022  | -1.562971 |
| Pd | -4.036199 | -0.500907 | -1.321696 | H | -0.352887 | 2.885015  | -3.507914 |
| O  | -3.517282 | -1.088396 | -3.378786 | H | 1.069327  | 4.112369  | -1.841022 |
| O  | -2.676692 | -2.902986 | -2.327529 | O | -2.852393 | -2.916203 | 1.885160  |
| C  | -3.034435 | -2.262231 | -3.375076 | O | -3.707247 | -3.093675 | -2.779692 |
| C  | -2.807108 | -2.942614 | -4.710398 | C | -2.088824 | -3.282967 | 3.022692  |
| H  | -2.939060 | -4.022677 | -4.613440 | H | -2.169316 | -4.360405 | 3.226300  |
| H  | -3.476914 | -2.534574 | -5.469529 | H | -1.031937 | -3.018909 | 2.899377  |
| H  | -1.772532 | -2.755678 | -5.023633 | H | -2.514521 | -2.725284 | 3.859544  |
| C  | -6.288411 | -1.488847 | 2.224870  | C | -5.039021 | -3.607977 | -2.903262 |
| C  | -5.632156 | -1.673132 | 0.822933  | H | -5.543706 | -2.985962 | -3.646758 |
| C  | -3.943038 | -2.146293 | 2.262101  | H | -5.012862 | -4.648942 | -3.255578 |
| C  | -5.124095 | -1.836532 | 3.211692  | H | -5.582562 | -3.567796 | -1.954307 |
| H  | -6.681241 | -0.477658 | 2.371660  | C | 0.498131  | 4.819417  | 0.604370  |
| H  | -7.127641 | -2.183772 | 2.334718  | C | 0.769877  | 6.131374  | 0.184794  |
| H  | -4.899057 | -1.015220 | 3.901036  | C | 1.144536  | 4.370453  | 1.777683  |
| H  | -5.369008 | -2.715289 | 3.817419  | C | 1.633457  | 6.968600  | 0.889761  |
| C  | -4.669467 | -2.849774 | 1.094616  | H | 0.279792  | 6.491777  | -0.714490 |
| H  | -4.023450 | -3.100601 | 0.249498  | C | 2.013063  | 5.215121  | 2.492860  |
| H  | -5.194428 | -3.756762 | 1.414851  | C | 2.259997  | 6.510864  | 2.051246  |
| C  | -4.645178 | -0.503485 | 0.626644  | H | 1.813745  | 7.979156  | 0.533766  |
| C  | -3.496409 | -0.797217 | 1.619456  | H | 2.492256  | 4.837163  | 3.390676  |
| H  | -6.356701 | -1.790504 | 0.013376  | H | 2.932208  | 7.156363  | 2.608684  |
| H  | -3.118639 | -2.699021 | 2.720735  | C | -2.189672 | 3.758714  | 1.536379  |
| H  | -3.465358 | -0.010125 | 2.379916  | H | -2.991628 | 3.049727  | 1.755832  |
| C  | -5.229349 | 0.844842  | 0.467950  | H | -1.422759 | 3.589640  | 2.295373  |
| O  | -5.919786 | 1.093293  | -0.531695 | C | -2.728185 | 5.196485  | 1.659750  |
| O  | -4.911351 | 1.755717  | 1.391200  | H | -1.931034 | 5.928984  | 1.489263  |
| C  | -5.387190 | 3.101692  | 1.159337  | H | -3.526269 | 5.359154  | 0.932418  |
| H  | -6.471531 | 3.101654  | 1.025960  | H | -3.132815 | 5.365278  | 2.664759  |
| H  | -5.103898 | 3.662202  | 2.049894  | F | -2.690173 | 1.934479  | -2.985131 |
| H  | -4.904716 | 3.519914  | 0.273830  | C | 0.954214  | 3.050686  | 2.300075  |
|    |           |           |           | N | 0.817354  | 2.020551  | 2.821807  |
|    |           |           |           | C | 3.890337  | 2.882199  | -0.712612 |
|    |           |           |           | C | 4.133250  | 4.370244  | -0.732936 |
|    |           |           |           | H | 3.595094  | 4.804900  | -1.583887 |
|    |           |           |           | H | 3.737819  | 4.827789  | 0.177106  |

**Beta\_C\_elim\_no\_CN\_OAc\_TS**

|    |           |           |           |
|----|-----------|-----------|-----------|
| Pd | -3.599644 | -0.081727 | -0.507199 |
| C  | -5.790874 | 1.539206  | 0.288733  |
| C  | -6.156761 | -0.798964 | 0.469008  |

|                                   |           |           |           |   |           |           |           |
|-----------------------------------|-----------|-----------|-----------|---|-----------|-----------|-----------|
| H                                 | 5.197697  | 4.586090  | -0.849448 | C | -7.450568 | 1.481831  | 1.572797  |
| O                                 | 4.728904  | 2.087816  | -1.260924 | C | -7.989122 | -0.506535 | 0.278886  |
| C                                 | -0.600320 | -0.602769 | -0.473427 | H | -7.713729 | 2.312948  | 2.217550  |
| C                                 | -1.567204 | -0.618042 | -2.603060 | H | -8.680071 | -1.247639 | -0.107299 |
| C                                 | -0.785806 | -0.614792 | 0.927604  | N | -5.783570 | 0.300248  | 0.407252  |
| C                                 | 0.717486  | -0.715263 | -1.016170 | H | -9.431094 | 0.651434  | 1.386466  |
| C                                 | -0.309606 | -0.739939 | -3.212173 | C | -8.386560 | 0.551396  | 1.105183  |
| H                                 | -2.478505 | -0.600079 | -3.185611 | N | -4.686590 | -1.545614 | -1.053599 |
| C                                 | 0.296958  | -0.746452 | 1.750358  | N | -3.792118 | 1.865525  | 1.026913  |
| H                                 | -1.791352 | -0.550054 | 1.327822  | C | -6.034361 | -1.688799 | -0.939647 |
| C                                 | 1.850350  | -0.783295 | -0.122735 | C | -4.972797 | 2.226452  | 1.609885  |
| C                                 | 0.824102  | -0.753280 | -2.429688 | O | -6.755054 | -2.562751 | -1.427036 |
| H                                 | -0.242504 | -0.807796 | -4.292452 | O | -5.172184 | 3.168170  | 2.377978  |
| C                                 | 1.628608  | -0.829188 | 1.255062  | C | -3.925948 | -2.383733 | -1.882308 |
| H                                 | 0.157894  | -0.735085 | 2.824997  | C | -2.851123 | -3.125668 | -1.331230 |
| H                                 | 1.794069  | -0.815878 | -2.908055 | C | -4.099750 | -2.386093 | -3.276885 |
| N                                 | -1.700565 | -0.507566 | -1.287499 | C | -2.002043 | -3.862956 | -2.162848 |
| Pd                                | 3.493576  | 0.374385  | -0.784962 | C | -3.258948 | -3.137280 | -4.106651 |
| C                                 | 5.860077  | -3.309223 | -1.375118 | C | -2.217862 | -3.868447 | -3.544177 |
| C                                 | 5.673101  | -1.863809 | -0.815249 | H | -1.177899 | -4.429471 | -1.746551 |
| C                                 | 3.902824  | -2.968975 | 0.076002  | H | -3.410786 | -3.110419 | -5.181043 |
| C                                 | 4.621114  | -4.061282 | -0.792526 | H | -1.553578 | -4.443537 | -4.183496 |
| H                                 | 5.904731  | -3.333632 | -2.468113 | C | -2.601900 | 2.472883  | 1.471311  |
| H                                 | 6.797816  | -3.732522 | -0.999499 | C | -1.824560 | 3.294134  | 0.628581  |
| H                                 | 3.967395  | -4.473736 | -1.567979 | C | -2.113529 | 2.167402  | 2.747713  |
| H                                 | 4.920366  | -4.890680 | -0.143633 | C | -0.579569 | 3.766661  | 1.098341  |
| C                                 | 5.125214  | -2.176528 | 0.586714  | C | -0.890483 | 2.616038  | 3.215846  |
| H                                 | 4.876343  | -1.288554 | 1.162653  | C | -0.119742 | 3.415184  | 2.377137  |
| H                                 | 5.805864  | -2.800903 | 1.175673  | H | -0.555321 | 2.327892  | 4.206280  |
| C                                 | 4.428147  | -1.334243 | -1.538740 | H | 0.839131  | 3.791270  | 2.721699  |
| C                                 | 3.301604  | -2.047071 | -0.969895 | O | -2.708501 | -3.037886 | 0.020453  |
| H                                 | 6.551164  | -1.223524 | -0.887975 | O | -5.057958 | -1.556455 | -3.804747 |
| H                                 | 3.193356  | -3.364369 | 0.796944  | C | -1.592586 | -3.680011 | 0.625561  |
| H                                 | 2.535190  | -2.445736 | -1.623402 | H | -1.632942 | -4.768529 | 0.487174  |
| C                                 | 2.689614  | -0.807153 | 2.305863  | H | -0.643762 | -3.294994 | 0.231648  |
| C                                 | 2.867738  | -1.846296 | 3.250364  | H | -1.639704 | -3.443722 | 1.687039  |
| C                                 | 3.467232  | 0.353567  | 2.439100  | C | -6.133648 | -2.215311 | -4.482112 |
| C                                 | 3.857513  | -1.726995 | 4.240534  | H | -6.811543 | -1.424171 | -4.811475 |
| C                                 | 4.449097  | 0.457683  | 3.423120  | H | -5.777314 | -2.770364 | -5.360763 |
| H                                 | 3.273776  | 1.189347  | 1.778049  | H | -6.654847 | -2.885845 | -3.793135 |
| C                                 | 4.658680  | -0.592051 | 4.318039  | C | 0.252181  | 4.718466  | 0.308251  |
| H                                 | 3.994496  | -2.538834 | 4.945220  | C | -0.195397 | 6.027779  | 0.089437  |
| H                                 | 5.042954  | 1.365027  | 3.491830  | C | 1.535887  | 4.379012  | -0.179649 |
| H                                 | 5.426443  | -0.521597 | 5.083103  | C | 0.593162  | 6.964196  | -0.577870 |
| C                                 | 2.040893  | -3.086644 | 3.203201  | H | -1.169884 | 6.310071  | 0.473278  |
| O                                 | 1.414981  | -3.490161 | 2.236472  | C | 2.344383  | 5.325162  | -0.840413 |
| O                                 | 2.052247  | -3.753596 | 4.378887  | C | 1.866712  | 6.615999  | -1.036738 |
| C                                 | 1.313170  | -4.985731 | 4.395532  | H | 0.217586  | 7.972848  | -0.726582 |
| H                                 | 1.473971  | -5.407731 | 5.387834  | H | 3.328811  | 5.030081  | -1.187035 |
| H                                 | 0.249086  | -4.797470 | 4.227320  | H | 2.487506  | 7.349095  | -1.543221 |
| H                                 | 1.678035  | -5.665634 | 3.620500  | C | -2.356514 | 3.618513  | -0.750999 |
| O                                 | 2.834508  | 2.421040  | -0.173978 | H | -1.544984 | 3.982087  | -1.389862 |
| C                                 | 4.511102  | -1.039806 | -2.999129 | F | -2.837128 | 1.330370  | 3.522809  |
| O                                 | 3.605876  | -1.152462 | -3.810093 | C | 2.039266  | 3.044656  | -0.058723 |
| O                                 | 5.744238  | -0.614485 | -3.329933 | N | 2.490346  | 1.976591  | -0.027778 |
| C                                 | 5.914069  | -0.214730 | -4.700281 | C | 5.010222  | 2.862190  | -2.521294 |
| H                                 | 6.956066  | 0.093576  | -4.785478 | O | 4.814031  | 3.175640  | -3.826155 |
| H                                 | 5.698659  | -1.048695 | -5.374213 | O | 4.975045  | 3.693113  | -1.638415 |
| H                                 | 5.245591  | 0.618081  | -4.935152 | N | 5.128594  | 0.879781  | -1.022884 |
|                                   |           |           |           | C | 6.058964  | 1.014859  | -0.054706 |
|                                   |           |           |           | C | 7.392520  | 1.677143  | -0.407049 |
|                                   |           |           |           | H | 8.009389  | 1.700083  | 0.492517  |
|                                   |           |           |           | H | 7.925145  | 1.116397  | -1.186129 |
|                                   |           |           |           | H | 7.239557  | 2.699174  | -0.768472 |
| <b>Beta_C_elim_with_CN_MPA TS</b> |           |           |           |   |           |           |           |
| Pd                                | -3.907243 | 0.128796  | -0.140189 |   |           |           |           |
| C                                 | -6.120514 | 1.328158  | 1.192756  |   |           |           |           |
| C                                 | -6.643498 | -0.611615 | -0.061282 |   |           |           |           |

|    |           |           |           |
|----|-----------|-----------|-----------|
| O  | 5.864638  | 0.603664  | 1.102833  |
| C  | 5.298683  | 1.374465  | -2.356531 |
| H  | 4.622015  | 0.848324  | -3.037710 |
| H  | 6.310846  | 1.211410  | -2.761352 |
| H  | 4.678894  | 4.141204  | -3.865905 |
| H  | -2.728330 | 2.692801  | -1.203707 |
| C  | -3.501912 | 4.647538  | -0.728108 |
| H  | -4.290361 | 4.339644  | -0.036275 |
| H  | -3.144499 | 5.631435  | -0.405210 |
| H  | -3.937684 | 4.758898  | -1.727727 |
| C  | -0.906329 | -0.389051 | -0.022909 |
| C  | -1.769973 | -0.065132 | -2.171685 |
| C  | -1.134636 | -0.464727 | 1.369310  |
| C  | 0.408531  | -0.619832 | -0.535157 |
| C  | -0.517421 | -0.304667 | -2.755285 |
| H  | -2.645046 | 0.135782  | -2.780189 |
| C  | -0.082451 | -0.688296 | 2.210819  |
| H  | -2.138778 | -0.331464 | 1.753083  |
| C  | 1.507806  | -0.853310 | 0.370612  |
| C  | 0.563020  | -0.580097 | -1.944906 |
| H  | -0.418331 | -0.286172 | -3.834797 |
| C  | 1.250490  | -0.871877 | 1.744107  |
| H  | -0.257263 | -0.699700 | 3.282160  |
| H  | 1.529030  | -0.782520 | -2.393651 |
| N  | -1.957389 | -0.104932 | -0.856705 |
| Pd | 3.352526  | 0.019484  | -0.369681 |
| C  | 5.106063  | -4.041819 | -0.666670 |
| C  | 5.157096  | -2.549753 | -0.219925 |
| C  | 3.214030  | -3.269267 | 0.702743  |
| C  | 3.745456  | -4.526022 | -0.071015 |
| H  | 5.169244  | -4.162272 | -1.751820 |
| H  | 5.948355  | -4.587414 | -0.227596 |
| H  | 3.042338  | -4.874149 | -0.835898 |
| H  | 3.882899  | -5.347817 | 0.639429  |
| C  | 4.547700  | -2.654115 | 1.183778  |
| H  | 4.467286  | -1.685986 | 1.668896  |
| H  | 5.103542  | -3.336232 | 1.836445  |
| C  | 4.030831  | -1.859758 | -1.000082 |
| C  | 2.783773  | -2.329518 | -0.412602 |
| H  | 6.126279  | -2.062914 | -0.304172 |
| H  | 2.443486  | -3.495866 | 1.433953  |
| H  | 1.977035  | -2.636108 | -1.069344 |
| C  | 2.286843  | -0.953744 | 2.815399  |
| C  | 2.263969  | -1.937771 | 3.836148  |
| C  | 3.266077  | 0.045690  | 2.883075  |
| C  | 3.231933  | -1.910147 | 4.852133  |
| C  | 4.243755  | 0.045511  | 3.877533  |
| H  | 3.287990  | 0.822029  | 2.130402  |
| C  | 4.228087  | -0.936041 | 4.866792  |
| H  | 3.206558  | -2.675477 | 5.619398  |
| H  | 5.022634  | 0.799885  | 3.846139  |
| H  | 4.985699  | -0.948214 | 5.645040  |
| C  | 1.264650  | -3.044813 | 3.828968  |
| O  | 0.680024  | -3.473866 | 2.847455  |
| O  | 1.065864  | -3.560452 | 5.062461  |
| C  | 0.147078  | -4.663569 | 5.124363  |
| H  | 0.121066  | -4.962190 | 6.172632  |
| H  | -0.846167 | -4.353635 | 4.787328  |
| H  | 0.492147  | -5.488511 | 4.494451  |
| C  | 4.157767  | -1.721324 | -2.476451 |
| O  | 3.244551  | -1.563661 | -3.274062 |
| O  | 5.448265  | -1.789500 | -2.869332 |
| C  | 5.673386  | -1.689437 | -4.284172 |
| H  | 5.351823  | -0.713552 | -4.658596 |

|   |          |           |           |
|---|----------|-----------|-----------|
| H | 6.748778 | -1.812995 | -4.415528 |
| H | 5.125843 | -2.471152 | -4.817908 |

#### Beta\_C\_elim\_with\_CN\_OAc\_TS

|    |           |           |           |
|----|-----------|-----------|-----------|
| Pd | -3.671483 | -0.067073 | -0.003950 |
| C  | -5.896662 | 0.980220  | 1.430866  |
| C  | -6.306502 | -1.066297 | 0.310097  |
| C  | -7.203915 | 1.019874  | 1.906769  |
| C  | -7.627178 | -1.078133 | 0.749596  |
| H  | -7.504711 | 1.854140  | 2.530661  |
| H  | -8.264588 | -1.903449 | 0.452343  |
| N  | -5.514158 | -0.049346 | 0.668275  |
| H  | -9.095683 | -0.013563 | 1.914271  |
| C  | -8.069947 | -0.023286 | 1.556603  |
| N  | -4.337746 | -1.854711 | -0.780319 |
| N  | -3.658288 | 1.739277  | 1.051639  |
| C  | -5.653656 | -2.121795 | -0.563874 |
| C  | -4.823806 | 2.016811  | 1.705136  |
| O  | -6.314750 | -3.084107 | -0.960616 |
| O  | -5.067250 | 2.985395  | 2.425403  |
| C  | -3.552144 | -2.652288 | -1.625469 |
| C  | -2.378058 | -3.261836 | -1.116651 |
| C  | -3.809801 | -2.734858 | -3.004353 |
| C  | -1.514471 | -3.955141 | -1.970708 |
| C  | -2.951429 | -3.440120 | -3.856254 |
| C  | -1.812783 | -4.044447 | -3.333806 |
| H  | -0.616259 | -4.423387 | -1.586804 |
| H  | -3.170417 | -3.476997 | -4.918679 |
| H  | -1.136378 | -4.583577 | -3.991439 |
| C  | -2.515812 | 2.515526  | 1.320738  |
| C  | -1.927681 | 3.331773  | 0.331485  |
| C  | -1.874390 | 2.389085  | 2.558670  |
| C  | -0.702379 | 3.973497  | 0.618659  |
| C  | -0.676336 | 3.017545  | 2.854160  |
| C  | -0.088641 | 3.806488  | 1.870553  |
| H  | -0.217742 | 2.870619  | 3.825927  |
| H  | 0.849733  | 4.312898  | 2.077112  |
| O  | -2.162533 | -3.094370 | 0.217477  |
| O  | -4.876870 | -2.028574 | -3.502175 |
| C  | -0.968946 | -3.622468 | 0.782303  |
| H  | -0.931636 | -4.715947 | 0.689354  |
| H  | -0.074817 | -3.185477 | 0.320822  |
| H  | -0.977504 | -3.343651 | 1.834203  |
| C  | -5.925601 | -2.822840 | -4.067921 |
| H  | -6.693439 | -2.118219 | -4.396336 |
| H  | -5.572447 | -3.397798 | -4.934899 |
| H  | -6.338243 | -3.493100 | -3.308616 |
| C  | -0.029836 | 4.865195  | -0.367383 |
| C  | -0.620032 | 6.066111  | -0.782088 |
| C  | 1.248973  | 4.558008  | -0.888260 |
| C  | 0.023784  | 6.923157  | -1.674022 |
| H  | -1.593058 | 6.328567  | -0.381409 |
| C  | 1.906170  | 5.423362  | -1.784022 |
| C  | 1.289808  | 6.605562  | -2.176097 |
| H  | -0.461395 | 7.848197  | -1.972527 |
| H  | 2.885714  | 5.150991  | -2.164487 |
| H  | 1.791868  | 7.274747  | -2.867912 |
| C  | -2.636171 | 3.464375  | -0.999906 |
| H  | -1.944754 | 3.839041  | -1.761270 |
| F  | -2.415466 | 1.558571  | 3.475258  |
| C  | 1.903547  | 3.332378  | -0.554890 |
| N  | 2.488447  | 2.351615  | -0.351489 |
| C  | 6.174701  | 1.519277  | -0.734215 |
| C  | 7.403278  | 2.117854  | -1.414049 |



|    |           |           |           |
|----|-----------|-----------|-----------|
| H  | 8.200227  | 2.282242  | -0.685766 |
| H  | 7.753485  | 1.415773  | -2.180261 |
| H  | 7.151012  | 3.055224  | -1.919292 |
| O  | 6.237374  | 1.059532  | 0.411758  |
| H  | -2.955751 | 2.467989  | -1.322991 |
| C  | -3.877483 | 4.373458  | -0.928581 |
| H  | -4.553693 | 4.051433  | -0.132089 |
| H  | -3.598980 | 5.412791  | -0.721998 |
| H  | -4.422345 | 4.353072  | -1.879409 |
| C  | -0.632410 | -0.296365 | -0.049332 |
| C  | -1.644854 | -0.143689 | -2.151876 |
| C  | -0.770430 | -0.320711 | 1.357621  |
| C  | 0.664920  | -0.437212 | -0.633218 |
| C  | -0.410080 | -0.282695 | -2.802065 |
| H  | -2.569216 | -0.054705 | -2.712262 |
| C  | 0.343280  | -0.432991 | 2.141416  |
| H  | -1.756501 | -0.235529 | 1.798668  |
| C  | 1.831164  | -0.554794 | 0.212228  |
| C  | 0.736103  | -0.428538 | -2.050550 |
| H  | -0.373772 | -0.289191 | -3.885622 |
| C  | 1.655737  | -0.541964 | 1.600547  |
| H  | 0.233525  | -0.409829 | 3.221307  |
| H  | 1.691125  | -0.547281 | -2.551643 |
| N  | -1.752162 | -0.145602 | -0.827479 |
| Pd | 3.532852  | 0.479366  | -0.612332 |
| C  | 5.577101  | -3.447644 | -0.990175 |
| C  | 5.533915  | -1.970263 | -0.492179 |
| C  | 3.679279  | -2.865011 | 0.463393  |
| C  | 4.279758  | -4.054888 | -0.364442 |
| H  | 5.607377  | -3.526377 | -2.081010 |
| H  | 6.474426  | -3.941018 | -0.601262 |
| H  | 3.580153  | -4.436477 | -1.116238 |
| H  | 4.507088  | -4.881673 | 0.316576  |
| C  | 4.977625  | -2.165566 | 0.922574  |
| H  | 4.837330  | -1.223255 | 1.440947  |
| H  | 5.603439  | -2.821734 | 1.537339  |
| C  | 4.335518  | -1.352734 | -1.221392 |
| C  | 3.148064  | -1.934434 | -0.615634 |
| H  | 6.459416  | -1.407905 | -0.583232 |
| H  | 2.950224  | -3.161860 | 1.212723  |
| H  | 2.353850  | -2.294329 | -1.260306 |
| C  | 2.760894  | -0.498817 | 2.603231  |
| C  | 2.905205  | -1.453531 | 3.641082  |
| C  | 3.646361  | 0.587832  | 2.578144  |
| C  | 3.946879  | -1.317489 | 4.572132  |
| C  | 4.695380  | 0.698371  | 3.489966  |
| H  | 3.528834  | 1.349372  | 1.818316  |
| C  | 4.850457  | -0.260599 | 4.489234  |
| H  | 4.052846  | -2.063316 | 5.351456  |
| H  | 5.394084  | 1.522994  | 3.394170  |
| H  | 5.667075  | -0.188965 | 5.201627  |
| C  | 2.008118  | -2.641036 | 3.737473  |
| O  | 1.366916  | -3.128477 | 2.821231  |
| O  | 1.977542  | -3.156384 | 4.986033  |
| C  | 1.167340  | -4.332856 | 5.144139  |
| H  | 1.271243  | -4.618926 | 6.191026  |
| H  | 0.122762  | -4.112784 | 4.906428  |
| H  | 1.518325  | -5.133328 | 4.486588  |
| O  | 5.118180  | 1.520887  | -1.493738 |
| C  | 4.417877  | -1.123861 | -2.693037 |
| O  | 3.473659  | -1.077723 | -3.467913 |
| O  | 5.694137  | -0.956061 | -3.082582 |
| C  | 5.874295  | -0.527031 | -4.440967 |
| H  | 6.953502  | -0.473305 | -4.587867 |

|   |          |           |           |
|---|----------|-----------|-----------|
| H | 5.423275 | -1.238197 | -5.138274 |
| H | 5.419159 | 0.457635  | -4.578124 |

**Beta\_C\_elim\_without\_CN\_MPAA\_TS**

|    |           |           |           |
|----|-----------|-----------|-----------|
| Pd | -3.800143 | -0.270264 | -0.684454 |
| C  | -6.255176 | 0.933404  | 0.074342  |
| C  | -6.255979 | -1.440649 | 0.096981  |
| C  | -7.585242 | 0.968457  | 0.483951  |
| C  | -7.584551 | -1.467195 | 0.510653  |
| H  | -8.060587 | 1.933056  | 0.623539  |
| H  | -8.058645 | -2.428469 | 0.675556  |
| N  | -5.666930 | -0.255053 | -0.100407 |
| H  | -9.284140 | -0.243788 | 1.022279  |
| C  | -8.246490 | -0.247175 | 0.700232  |
| N  | -4.129531 | -2.293553 | -0.574718 |
| N  | -4.104898 | 1.776641  | -0.521445 |
| C  | -5.365262 | -2.654205 | -0.133816 |
| C  | -5.368511 | 2.144347  | -0.183588 |
| O  | -5.801742 | -3.790214 | 0.054230  |
| O  | -5.833429 | 3.280028  | -0.061305 |
| C  | -3.042614 | -3.182977 | -0.640998 |
| C  | -2.382407 | -3.589308 | 0.540950  |
| C  | -2.440967 | -3.473348 | -1.876630 |
| C  | -1.155554 | -4.258378 | 0.478202  |
| C  | -1.209552 | -4.129570 | -1.945945 |
| C  | -0.572520 | -4.510131 | -0.766853 |
| H  | -0.620287 | -4.521797 | 1.380313  |
| H  | -0.772601 | -4.312696 | -2.922205 |
| H  | 0.391217  | -5.012011 | -0.807672 |
| C  | -3.062145 | 2.691515  | -0.774540 |
| C  | -2.383363 | 3.413981  | 0.235227  |
| C  | -2.569630 | 2.745993  | -2.084129 |
| C  | -1.211451 | 4.122301  | -0.115742 |
| C  | -1.411977 | 3.417305  | -2.432075 |
| C  | -0.728207 | 4.103688  | -1.433155 |
| H  | -1.062347 | 3.390123  | -3.458806 |
| H  | 0.206509  | 4.606785  | -1.652875 |
| O  | -2.994506 | -3.207743 | 1.698555  |
| O  | -3.009518 | -3.016791 | -3.044466 |
| C  | -2.369265 | -3.541872 | 2.926504  |
| H  | -2.294446 | -4.631229 | 3.054831  |
| H  | -1.366428 | -3.105303 | 2.998275  |
| H  | -3.011799 | -3.130652 | 3.707996  |
| C  | -4.236271 | -3.657955 | -3.409077 |
| H  | -4.665229 | -3.064486 | -4.220379 |
| H  | -4.040795 | -4.678872 | -3.766384 |
| H  | -4.939642 | -3.701022 | -2.572336 |
| C  | -0.458600 | 4.994752  | 0.836113  |
| C  | -0.422973 | 6.372523  | 0.574687  |
| C  | 0.280712  | 4.527864  | 1.944376  |
| C  | 0.304770  | 7.255561  | 1.369878  |
| H  | -0.984360 | 6.745681  | -0.276355 |
| C  | 1.015188  | 5.418349  | 2.748624  |
| C  | 1.029385  | 6.778477  | 2.463831  |
| H  | 0.304815  | 8.316522  | 1.134901  |
| H  | 1.573794  | 5.024478  | 3.592121  |
| H  | 1.599765  | 7.459045  | 3.089310  |
| C  | -2.952172 | 3.461238  | 1.638059  |
| H  | -3.623887 | 2.609817  | 1.779339  |
| H  | -2.153599 | 3.343725  | 2.374439  |
| C  | -3.717627 | 4.769854  | 1.909534  |
| H  | -3.053495 | 5.635966  | 1.811039  |
| H  | -4.545121 | 4.871761  | 1.203451  |
| H  | -4.124914 | 4.769376  | 2.927840  |

F -3.238721 2.064331 -3.049284  
 C 0.314468 3.147702 2.325636  
 N 0.351092 2.068935 2.758696  
 N 4.821154 1.686608 -1.314448  
 C 6.093208 1.690578 -1.212519  
 C 7.060940 2.714986 -1.747739  
 H 7.813277 2.212122 -2.368883  
 H 6.575007 3.475316 -2.357234  
 H 7.581977 3.209279 -0.919347  
 O 6.652387 0.667170 -0.527476  
 C 4.036751 2.814079 -1.818287  
 H 3.598294 2.528738 -2.783186  
 H 4.616455 3.729679 -1.953479  
 C 2.856880 3.122388 -0.846543  
 O 2.410770 2.109574 -0.176193  
 O 2.429087 4.270797 -0.816620  
 C -0.776472 -0.532138 -0.454659  
 C -1.574635 -0.316939 -2.643045  
 C -1.054031 -0.619111 0.929564  
 C 0.573782 -0.626931 -0.907032  
 C -0.278415 -0.424890 -3.167218  
 H -2.432629 -0.187116 -3.287071  
 C -0.025676 -0.748574 1.820851  
 H -2.084554 -0.574127 1.264850  
 C 1.645290 -0.753562 0.050744  
 C 0.786589 -0.572194 -2.307330  
 H -0.131418 -0.391731 -4.241172  
 C 1.336515 -0.794039 1.413468  
 H -0.238350 -0.753292 2.883390  
 H 1.787979 -0.655990 -2.711731  
 N -1.812390 -0.361174 -1.338425  
 Pd 3.407303 0.279660 -0.579234  
 C 5.406832 -3.721588 -0.867213  
 C 5.361643 -2.252198 -0.347770  
 C 3.394475 -3.099087 0.396753  
 C 4.036644 -4.294991 -0.384750  
 H 5.541118 -3.779216 -1.951870  
 H 6.246057 -4.254031 -0.405569  
 H 3.402720 -4.641128 -1.208155  
 H 4.169574 -5.139190 0.299772  
 C 4.657404 -2.447704 1.002710  
 H 4.470678 -1.511924 1.525435  
 H 5.195802 -3.128539 1.671349  
 C 4.263746 -1.568988 -1.176519  
 C 3.009770 -2.131138 -0.707234  
 H 6.316210 -1.733891 -0.345508  
 H 2.582993 -3.379115 1.062257  
 H 2.265100 -2.449807 -1.427222  
 C 2.344924 -0.690970 2.510081  
 C 2.504066 -1.637360 3.552414  
 C 3.108772 0.487687 2.564522  
 C 3.467699 -1.419525 4.552242  
 C 4.065981 0.686309 3.558157  
 H 2.909061 1.269172 1.841726  
 C 4.262270 -0.277890 4.546943  
 H 3.591032 -2.162763 5.331019  
 H 4.644487 1.606305 3.564426  
 H 5.009407 -0.133531 5.322216  
 C 1.698689 -2.888644 3.605539  
 O 1.093157 -3.389477 2.672279  
 O 1.699992 -3.450003 4.835864  
 C 0.973256 -4.683697 4.949474  
 H 1.118730 -5.013195 5.978558  
 H -0.089231 -4.523807 4.745222

H 1.359466 -5.426635 4.245741  
 H 7.614313 0.668502 -0.650463  
 C 4.491201 -1.324780 -2.623800  
 O 5.810847 -1.150597 -2.893778  
 O 3.641128 -1.263575 -3.497251  
 C 6.112425 -0.847804 -4.263820  
 H 5.656648 0.104217 -4.553861  
 H 7.200550 -0.785142 -4.317923  
 H 5.740488 -1.631557 -4.929086

### Cat\_3Pd

Pd 0.019796 -1.845612 -0.008271  
 C 2.310494 -1.203712 -1.860105  
 O 1.642569 -2.081213 -1.238427  
 O 2.324914 0.047206 -1.654719  
 C 0.008915 2.582633 1.891056  
 O -1.061050 2.442258 1.228673  
 O 1.115802 1.994938 1.702942  
 C -0.052611 3.570024 3.038212  
 H 0.918297 3.658771 3.527167  
 H -0.370059 4.544034 2.652999  
 H -0.809311 3.235866 3.754932  
 C 3.223525 -1.715642 -2.955337  
 H 2.734815 -2.526118 -3.500713  
 H 3.503676 -0.904516 -3.629525  
 H 4.130820 -2.116535 -2.488927  
 Pd -1.619371 0.911634 -0.014149  
 C -0.071423 2.596800 -1.871646  
 O 1.001585 2.478793 -1.209709  
 O -1.163223 1.980152 -1.688453  
 C 2.237830 -1.330373 1.871280  
 O 1.170822 -1.984818 1.668386  
 O 2.648733 -0.309502 1.245145  
 C 3.143729 -1.850145 2.968674  
 H 3.638059 -1.017563 3.473593  
 H 2.574181 -2.454411 3.677077  
 H 3.913825 -2.481532 2.510435  
 C -0.033983 3.592869 -3.012334  
 H 0.723132 3.275450 -3.736272  
 H -1.009350 3.668411 -3.494573  
 H 0.270356 4.569397 -2.623104  
 Pd 1.595686 0.951263 0.020049  
 C -2.279674 -1.272898 1.852562  
 O -1.596699 -2.130646 1.218798  
 O -2.328316 -0.022274 1.653352  
 C -3.148615 -1.817587 2.967741  
 H -2.536209 -2.423496 3.641512  
 H -3.632127 -1.006166 3.513269  
 H -3.910033 -2.472789 2.531352  
 C -2.209055 -1.367605 -1.884616  
 O -1.128145 -1.999886 -1.685533  
 O -2.642780 -0.360565 -1.251439  
 C -3.102499 -1.897490 -2.987341  
 H -3.872622 -2.531614 -2.533038  
 H -3.598478 -1.069460 -3.498303  
 H -2.523524 -2.499627 -3.689780

### Int\_1

Pd 1.176210 0.904590 0.281290  
 C 1.267798 3.641876 -0.472147  
 C 3.317639 2.472972 -0.714384  
 C 1.846101 4.817743 -0.939631  
 C 3.949404 3.618310 -1.190995  
 H 1.228611 5.705928 -1.015380

H 4.996492 3.556091 -1.466065  
 N 2.025027 2.541707 -0.378374  
 H 3.673154 5.702693 -1.664566  
 C 3.200522 4.796383 -1.296628  
 N 3.084322 0.194711 -0.031931  
 N -0.447129 2.185002 0.308949  
 C 3.959133 1.104971 -0.553457  
 C -0.190335 3.463095 -0.078725  
 O 5.133363 0.932841 -0.872779  
 O -0.981467 4.401607 -0.170053  
 C 3.429369 -1.157519 0.087196  
 C 3.703088 -1.943734 -1.050910  
 C 3.362524 -1.789885 1.345772  
 C 3.969174 -3.312890 -0.929019  
 C 3.598558 -3.164747 1.469274  
 C 3.913141 -3.906650 0.330847  
 H 4.194284 -3.916485 -1.800044  
 H 3.555751 -3.653674 2.434884  
 H 4.112047 -4.970446 0.427724  
 C -1.723709 1.746452 0.703354  
 C -2.520766 0.962538 -0.160151  
 C -2.131050 1.919680 2.028850  
 C -3.681109 0.347672 0.354980  
 C -3.298262 1.364063 2.532251  
 C -4.066368 0.569359 1.686675  
 H -3.573294 1.538184 3.567042  
 H -4.970011 0.100151 2.063600  
 O 3.621290 -1.281861 -2.240168  
 O 3.039752 -0.970758 2.390282  
 C 4.061048 -1.945880 -3.411919  
 H 5.101619 -2.281470 -3.315561  
 H 3.424678 -2.809452 -3.655127  
 H 3.991094 -1.210985 -4.216059  
 C 2.865969 -1.552228 3.669848  
 H 2.597565 -0.730036 4.336525  
 H 2.057255 -2.297194 3.667323  
 H 3.789148 -2.022732 4.033917  
 C -4.487587 -0.601282 -0.464816  
 C -3.919143 -1.808413 -0.897205  
 C -5.838680 -0.353678 -0.794515  
 C -4.654468 -2.737308 -1.630048  
 H -2.884169 -2.014460 -0.646243  
 C -6.582579 -1.293844 -1.531364  
 C -5.991695 -2.481922 -1.948461  
 H -4.181645 -3.663019 -1.946830  
 H -7.617975 -1.075848 -1.773391  
 H -6.569954 -3.203103 -2.518433  
 C -2.138781 0.889380 -1.622983  
 H -1.048902 0.849305 -1.714590  
 H -2.533975 -0.018985 -2.083797  
 C -2.668231 2.122409 -2.382960  
 H -3.763654 2.150783 -2.353756  
 H -2.297569 3.047381 -1.930397  
 H -2.353871 2.092087 -3.432958  
 F -1.321298 2.606827 2.863649  
 C -6.479177 0.867673 -0.397026  
 N -7.031303 1.844466 -0.090537  
 C -0.051167 -1.918302 0.252280  
 C -0.253954 -0.748582 2.263100  
 C 0.407194 -1.978241 -1.087791  
 C -0.789278 -3.018822 0.792533  
 C -0.983678 -1.794349 2.863483  
 H -0.047851 0.165858 2.808135  
 C 0.132086 -3.085110 -1.858937

H 0.985387 -1.150662 -1.484605  
 C -1.055057 -4.143465 -0.033600  
 C -1.250506 -2.925475 2.128285  
 H -1.333474 -1.678644 3.883220  
 C -0.606826 -4.174434 -1.334520  
 H 0.491221 -3.123598 -2.882970  
 H -1.820648 -3.747864 2.552659  
 H -0.813152 -5.036520 -1.962142  
 N 0.196916 -0.803713 1.017248  
 H -1.622529 -4.972618 0.380776

**Int\_2**

Pd 2.749256 0.069668 0.101493  
 C 4.727561 1.748249 -1.070119  
 C 5.082476 -0.572726 -1.382906  
 C 5.882216 2.055105 -1.782758  
 C 6.246104 -0.328167 -2.107110  
 H 6.151303 3.097518 -1.912154  
 H 6.801744 -1.175199 -2.494052  
 N 4.388034 0.464453 -0.903305  
 H 7.548436 1.214419 -2.862147  
 C 6.643007 0.999714 -2.301665  
 N 3.365520 -1.851576 -0.325383  
 N 2.719711 2.143292 0.153141  
 C 4.502075 -1.941162 -1.076710  
 C 3.772786 2.754345 -0.455281  
 O 5.063882 -2.955196 -1.484486  
 O 3.990119 3.963132 -0.558133  
 C 2.637254 -3.000688 0.014188  
 C 1.986784 -3.770055 -0.972185  
 C 2.434041 -3.326434 1.371321  
 C 1.189188 -4.864002 -0.615189  
 C 1.612476 -4.400696 1.734126  
 C 1.007594 -5.162400 0.734326  
 H 0.693725 -5.462726 -1.369650  
 H 1.451125 -4.654314 2.774608  
 H 0.377651 -6.002250 1.013498  
 C 1.709358 2.892815 0.781071  
 C 0.553121 3.318059 0.092810  
 C 1.793782 3.118114 2.159120  
 C -0.471472 3.958427 0.821754  
 C 0.802114 3.761641 2.881944  
 C -0.334657 4.186083 2.198868  
 H 0.925496 3.912616 3.949065  
 H -1.136829 4.681304 2.738052  
 O 2.148715 -3.324902 -2.249735  
 O 3.068015 -2.511390 2.265632  
 C 1.654433 -4.125665 -3.309441  
 H 2.086888 -5.134163 -3.286045  
 H 0.557748 -4.203066 -3.284097  
 H 1.957999 -3.623375 -4.229832  
 C 2.900063 -2.771628 3.648372  
 H 3.495020 -2.016941 4.166836  
 H 1.847975 -2.675374 3.951544  
 H 3.265765 -3.770387 3.921048  
 C -1.740604 4.394615 0.171438  
 C -2.040554 5.747006 -0.012735  
 C -2.713818 3.452104 -0.228792  
 C -3.255996 6.143186 -0.577765  
 H -1.306884 6.488601 0.288393  
 C -3.945602 3.837807 -0.792376  
 C -4.206324 5.194179 -0.965049  
 H -3.461910 7.201287 -0.713786  
 H -4.673411 3.075763 -1.058700

|    |           |           |           |
|----|-----------|-----------|-----------|
| H  | -5.152133 | 5.506962  | -1.396280 |
| C  | 0.481072  | 3.140481  | -1.408596 |
| H  | 1.087854  | 2.275606  | -1.692847 |
| H  | -0.544573 | 2.927688  | -1.724257 |
| C  | 0.990386  | 4.393006  | -2.148479 |
| H  | 0.354267  | 5.257318  | -1.924357 |
| H  | 2.013400  | 4.628160  | -1.841518 |
| H  | 0.973318  | 4.231388  | -3.232530 |
| F  | 2.876868  | 2.645090  | 2.820515  |
| C  | -2.496361 | 2.052846  | -0.063305 |
| N  | -2.437715 | 0.894523  | 0.006067  |
| C  | -0.053759 | -1.054006 | 0.662303  |
| C  | 1.006226  | -0.072709 | 2.494399  |
| C  | -0.072618 | -1.351159 | -0.734720 |
| C  | -1.133535 | -1.478819 | 1.487278  |
| C  | -0.028963 | -0.452034 | 3.364415  |
| H  | 1.860852  | 0.486282  | 2.856822  |
| C  | -1.110709 | -2.052842 | -1.281128 |
| H  | 0.772472  | -1.040804 | -1.340093 |
| C  | -2.214235 | -2.221897 | 0.899897  |
| C  | -1.096368 | -1.167951 | 2.859911  |
| H  | 0.030716  | -0.178788 | 4.412239  |
| C  | -2.193769 | -2.514596 | -0.466246 |
| H  | -1.103834 | -2.293755 | -2.339210 |
| H  | -1.914801 | -1.486784 | 3.499552  |
| H  | -2.912559 | -3.228297 | -0.851143 |
| N  | 1.005018  | -0.369839 | 1.196165  |
| Pd | -3.774478 | -0.737679 | -0.164055 |
| H  | -2.952886 | -2.714704 | 1.524463  |
| C  | -6.244183 | 0.310330  | -1.109123 |
| O  | -7.059698 | 1.090297  | -1.564033 |
| O  | -5.072302 | 0.710143  | -0.646024 |
| N  | -5.389064 | -1.906890 | -0.409775 |
| C  | -5.519723 | -3.174738 | 0.048347  |
| C  | -6.869408 | -3.860294 | -0.190844 |
| H  | -6.762775 | -4.906007 | 0.100400  |
| H  | -7.656183 | -3.400620 | 0.419416  |
| H  | -7.187424 | -3.800864 | -1.237352 |
| O  | -4.623408 | -3.801214 | 0.630728  |
| C  | -6.500917 | -1.195005 | -1.033971 |
| H  | -7.437581 | -1.325476 | -0.478650 |
| H  | -6.687913 | -1.543638 | -2.060342 |

### Int\_3

|    |          |           |           |
|----|----------|-----------|-----------|
| Pd | 2.877252 | -0.053265 | 0.357195  |
| C  | 4.974128 | 1.790955  | -0.161583 |
| C  | 5.509262 | -0.476996 | -0.602584 |
| C  | 6.245930 | 2.200642  | -0.550118 |
| C  | 6.793822 | -0.126713 | -1.009224 |
| H  | 6.486213 | 3.257386  | -0.514245 |
| H  | 7.464985 | -0.911486 | -1.340357 |
| N  | 4.674854 | 0.487484  | -0.200337 |
| H  | 8.155586 | 1.521097  | -1.284080 |
| C  | 7.157330 | 1.224823  | -0.974453 |
| N  | 3.655751 | -1.896173 | -0.099092 |
| N  | 2.704993 | 2.009979  | 0.551532  |
| C  | 4.928569 | -1.881917 | -0.592890 |
| C  | 3.847920 | 2.703153  | 0.295174  |
| O  | 5.599246 | -2.830450 | -0.993122 |
| O  | 4.029543 | 3.920626  | 0.370299  |
| C  | 2.867565 | -3.054669 | -0.123172 |
| C  | 2.460389 | -3.633560 | -1.342676 |
| C  | 2.332787 | -3.560533 | 1.078975  |
| C  | 1.588903 | -4.729297 | -1.359068 |

|    |           |           |           |
|----|-----------|-----------|-----------|
| C  | 1.440873  | -4.639975 | 1.066436  |
| C  | 1.089665  | -5.218521 | -0.153040 |
| H  | 1.282927  | -5.184848 | -2.292916 |
| H  | 1.030708  | -5.036302 | 1.987232  |
| H  | 0.406508  | -6.063291 | -0.163384 |
| C  | 1.535202  | 2.662232  | 0.983773  |
| C  | 0.568072  | 3.159025  | 0.082163  |
| C  | 1.252981  | 2.699014  | 2.354546  |
| C  | -0.619342 | 3.719921  | 0.600347  |
| C  | 0.070423  | 3.204617  | 2.870207  |
| C  | -0.865732 | 3.726429  | 1.980336  |
| H  | -0.094840 | 3.196689  | 3.942224  |
| H  | -1.786745 | 4.160948  | 2.358125  |
| O  | 2.927682  | -3.007033 | -2.460646 |
| O  | 2.732118  | -2.908829 | 2.211166  |
| C  | 2.615548  | -3.565750 | -3.724492 |
| H  | 2.995906  | -4.591499 | -3.816542 |
| H  | 1.531943  | -3.564840 | -3.911548 |
| H  | 3.109920  | -2.930497 | -4.461861 |
| C  | 2.163413  | -3.305216 | 3.446311  |
| H  | 2.600891  | -2.647549 | 4.200434  |
| H  | 1.070895  | -3.181351 | 3.444420  |
| H  | 2.408113  | -4.347123 | 3.692906  |
| C  | -1.594370 | 4.425145  | -0.286774 |
| C  | -1.316362 | 5.733884  | -0.702740 |
| C  | -2.827251 | 3.866460  | -0.690128 |
| C  | -2.215739 | 6.457162  | -1.486165 |
| H  | -0.381040 | 6.185165  | -0.388230 |
| C  | -3.743065 | 4.594813  | -1.476795 |
| C  | -3.432941 | 5.889397  | -1.874000 |
| H  | -1.968750 | 7.470869  | -1.788470 |
| H  | -4.682907 | 4.133705  | -1.763595 |
| H  | -4.136580 | 6.452457  | -2.479127 |
| C  | 0.811527  | 3.037662  | -1.407627 |
| H  | 1.342526  | 2.095829  | -1.585016 |
| H  | -0.151208 | 2.962409  | -1.926816 |
| C  | 1.629470  | 4.195565  | -2.010168 |
| H  | 1.058765  | 5.129922  | -1.990022 |
| H  | 2.555881  | 4.354050  | -1.452582 |
| H  | 1.878329  | 3.979059  | -3.055685 |
| F  | 2.160783  | 2.173561  | 3.208197  |
| C  | -3.198600 | 2.529257  | -0.353675 |
| N  | -3.604388 | 1.459063  | -0.174045 |
| C  | -0.041802 | -0.820104 | 0.034536  |
| C  | 0.629375  | -0.422003 | 2.240650  |
| C  | 0.306451  | -1.040415 | -1.322043 |
| C  | -1.417775 | -0.846833 | 0.428201  |
| C  | -0.692314 | -0.507005 | 2.714283  |
| H  | 1.448880  | -0.198829 | 2.913385  |
| C  | -0.686727 | -1.255297 | -2.249429 |
| H  | 1.353300  | -1.060049 | -1.605238 |
| C  | -2.441305 | -0.996930 | -0.564012 |
| C  | -1.709799 | -0.693171 | 1.806915  |
| H  | -0.887462 | -0.386668 | 3.774294  |
| C  | -2.054113 | -1.212541 | -1.876998 |
| H  | -0.419987 | -1.441295 | -3.286549 |
| H  | -2.747722 | -0.716487 | 2.126670  |
| H  | -2.809474 | -1.338848 | -2.649175 |
| N  | 0.941820  | -0.558523 | 0.958652  |
| Pd | -4.362879 | -0.439783 | -0.135839 |
| H  | -3.026850 | -2.812627 | -0.332666 |
| C  | -7.215298 | -0.635094 | 0.236436  |
| O  | -8.409324 | -0.428778 | 0.387612  |
| O  | -6.275105 | 0.263161  | 0.215278  |

N -5.307068 -2.263207 -0.081263  
 C -4.801187 -3.453073 -0.102332  
 C -5.611812 -4.715993 0.005429  
 H -4.959504 -5.581889 -0.112030  
 H -6.108876 -4.768002 0.980428  
 H -6.393701 -4.738765 -0.760387  
 O -3.500927 -3.676328 -0.218190  
 C -6.768330 -2.103605 0.046227  
 H -7.148850 -2.673473 0.901127  
 H -7.268057 -2.484723 -0.852676

**Int\_4**

Pd 3.346436 -0.319737 0.421748  
 C 5.706993 1.227320 0.117054  
 C 5.975623 -1.093273 -0.295260  
 C 7.053885 1.462301 -0.142005  
 C 7.328875 -0.918705 -0.572098  
 H 7.428411 2.477329 -0.070148  
 H 7.918685 -1.786585 -0.845826  
 N 5.242473 -0.024593 0.034094  
 H 8.918139 0.532033 -0.695296  
 C 7.863863 0.372397 -0.487239  
 N 3.909329 -2.250302 0.015285  
 N 3.429611 1.749812 0.615409  
 C 5.211980 -2.406723 -0.361889  
 C 4.673380 2.283153 0.475898  
 O 5.782425 -3.434781 -0.719653  
 O 5.009262 3.465555 0.580661  
 C 2.968167 -3.278272 -0.131594  
 C 2.610803 -3.758370 -1.408474  
 C 2.238800 -3.726347 0.988363  
 C 1.595370 -4.710799 -1.557623  
 C 1.206108 -4.661077 0.841830  
 C 0.905788 -5.150871 -0.428846  
 H 1.327584 -5.092216 -2.535463  
 H 0.646905 -5.013940 1.699735  
 H 0.113919 -5.886456 -0.541665  
 C 2.317787 2.548872 0.943306  
 C 1.507196 3.159471 -0.039040  
 C 1.914614 2.620016 2.282243  
 C 0.349306 3.855956 0.372866  
 C 0.755177 3.259247 2.690510  
 C -0.026309 3.886228 1.723273  
 H 0.486199 3.265797 3.741198  
 H -0.924467 4.420730 2.018610  
 O 3.281183 -3.181603 -2.447026  
 O 2.602009 -3.167636 2.180751  
 C 3.011811 -3.640290 -3.759371  
 H 3.233835 -4.710251 -3.866646  
 H 1.965631 -3.458342 -4.045464  
 H 3.670253 -3.068641 -4.416259  
 C 1.837682 -3.488674 3.328885  
 H 2.278304 -2.918084 4.149224  
 H 0.785245 -3.195172 3.205707  
 H 1.889339 -4.559406 3.568302  
 C -0.446318 4.675396 -0.590626  
 C 0.064557 5.905478 -1.027660  
 C -1.732580 4.311852 -1.048963  
 C -0.658633 6.735115 -1.883953  
 H 1.041119 6.212101 -0.668175  
 C -2.470196 5.149742 -1.910051  
 C -1.930221 6.359355 -2.327428  
 H -0.231554 7.682862 -2.199293  
 H -3.455756 4.837109 -2.240590

H -2.496801 7.005611 -2.990598  
 C 1.869521 2.999317 -1.501163  
 H 2.272741 1.989554 -1.635245  
 H 0.958201 3.058663 -2.107785  
 C 2.901179 4.018940 -2.019597  
 H 2.472128 5.025291 -2.064534  
 H 3.779068 4.056318 -1.369941  
 H 3.222795 3.749145 -3.032460  
 F 2.669753 1.990766 3.210150  
 C -2.335419 3.065164 -0.698436  
 N -2.908926 2.076461 -0.508006  
 C 0.386573 -0.628025 -0.149380  
 C 0.933826 -0.399640 2.115322  
 C 0.803875 -0.845194 -1.486155  
 C -1.003372 -0.446475 0.145322  
 C -0.414447 -0.250575 2.482728  
 H 1.723194 -0.337465 2.855069  
 C -0.132103 -0.845024 -2.495443  
 H 1.853914 -1.023343 -1.692487  
 C -1.941209 -0.425402 -0.930710  
 C -1.378525 -0.240449 1.500074  
 H -0.669094 -0.091523 3.525036  
 C -1.505113 -0.619645 -2.223393  
 H 0.186700 -1.014801 -3.520969  
 H -2.417764 -0.049034 1.749520  
 H -2.210772 -0.600394 -3.049710  
 N 1.321498 -0.556134 0.855797  
 Pd -3.805356 0.182807 -0.430043  
 O -4.532267 0.923471 2.239861  
 O -5.624521 1.054852 0.275042  
 C -5.536167 1.203497 1.560261  
 C -6.810139 1.689500 2.233338  
 H -7.413030 0.804488 2.470553  
 H -6.572140 2.206370 3.166150  
 H -7.392623 2.335676 1.571654  
 C -6.759795 -3.084354 -1.203218  
 C -6.393856 -1.584421 -0.945457  
 C -4.762471 -2.264279 -2.366240  
 C -5.629285 -3.561264 -2.172294  
 H -6.805174 -3.657936 -0.273530  
 H -7.744006 -3.145855 -1.678495  
 H -5.043206 -4.393691 -1.770178  
 H -6.032306 -3.878888 -3.139585  
 C -5.868308 -1.185575 -2.340592  
 H -5.485722 -0.161032 -2.384332  
 H -6.615464 -1.326386 -3.129152  
 C -5.105645 -1.659919 -0.140010  
 C -4.107963 -2.074835 -1.011143  
 H -7.171865 -0.972805 -0.496191  
 H -4.086078 -2.290460 -3.222136  
 H -3.206614 -2.591939 -0.708033  
 C -5.146499 -1.872657 1.333550  
 O -6.181257 -1.866004 1.968373  
 O -3.927602 -2.091851 1.859084  
 C -3.869319 -2.052849 3.298043  
 H -4.492235 -2.840338 3.730195  
 H -2.818566 -2.210384 3.544362  
 H -4.209401 -1.070565 3.635216

**Int\_5**

Pd 3.094727 0.145965 0.388018  
 C 5.024686 2.201196 0.003707  
 C 5.743199 0.029972 -0.617400  
 C 6.255459 2.745236 -0.350943

|   |           |           |           |              |           |           |           |
|---|-----------|-----------|-----------|--------------|-----------|-----------|-----------|
| C | 6.990982  | 0.517284  | -0.995664 | H            | 1.882139  | -0.457573 | 2.957239  |
| H | 6.405421  | 3.812348  | -0.230252 | C            | -0.323083 | -1.603621 | -2.143921 |
| H | 7.722405  | -0.181120 | -1.387102 | H            | 1.525555  | -0.677837 | -1.585919 |
| N | 4.831216  | 0.885544  | -0.141910 | C            | -1.842793 | -2.308005 | -0.330986 |
| H | 8.209448  | 2.289665  | -1.139305 | C            | -0.970524 | -2.022438 | 2.020680  |
| C | 7.241659  | 1.887237  | -0.853610 | H            | -0.073658 | -1.655019 | 3.941159  |
| N | 4.036694  | -1.585212 | -0.199408 | C            | -1.543175 | -2.182731 | -1.694130 |
| N | 2.754773  | 2.172364  | 0.739363  | H            | -0.132681 | -1.542269 | -3.210468 |
| C | 5.291392  | -1.417679 | -0.708126 | H            | -1.844595 | -2.501242 | 2.434788  |
| C | 3.827798  | 2.979708  | 0.519777  | H            | -2.189727 | -2.639520 | -2.430804 |
| O | 6.036871  | -2.270232 | -1.185457 | N            | 1.283320  | -0.729439 | 1.013379  |
| O | 3.906686  | 4.201235  | 0.668053  | Pd           | -3.161949 | -0.450749 | -0.896861 |
| C | 3.374878  | -2.818634 | -0.281777 | O            | -3.813535 | 1.917822  | 0.861294  |
| C | 2.939022  | -3.326057 | -1.522599 | O            | -4.785362 | 0.829064  | -0.861532 |
| C | 3.002257  | -3.496574 | 0.896573  | C            | -4.747435 | 1.737530  | 0.069363  |
| C | 2.181197  | -4.502067 | -1.588290 | C            | -6.014638 | 2.576948  | 0.146930  |
| C | 2.228203  | -4.662462 | 0.837724  | H            | -6.727899 | 2.036166  | 0.780008  |
| C | 1.834090  | -5.154527 | -0.406332 | H            | -5.794167 | 3.544222  | 0.604782  |
| H | 1.848891  | -4.899021 | -2.539734 | H            | -6.469090 | 2.711540  | -0.837940 |
| H | 1.940739  | -5.188168 | 1.739920  | C            | -5.989704 | -3.679054 | 0.137985  |
| H | 1.241655  | -6.064146 | -0.454999 | C            | -5.406323 | -2.510312 | -0.712212 |
| C | 1.493749  | 2.691889  | 1.090803  | C            | -3.764359 | -4.077674 | -0.787487 |
| C | 0.639658  | 3.331637  | 0.163698  | C            | -4.868576 | -4.769576 | 0.054242  |
| C | 1.008329  | 2.437047  | 2.378873  | H            | -6.218113 | -3.368535 | 1.160165  |
| C | -0.668521 | 3.668718  | 0.573467  | H            | -6.924266 | -4.033735 | -0.310148 |
| C | -0.284632 | 2.732959  | 2.775646  | H            | -4.504330 | -5.083238 | 1.038957  |
| C | -1.129398 | 3.351385  | 1.857832  | H            | -5.225556 | -5.667831 | -0.460913 |
| H | -0.611222 | 2.477704  | 3.778164  | C            | -4.652181 | -3.301256 | -1.795749 |
| H | -2.165036 | 3.548333  | 2.111006  | H            | -4.127682 | -2.659794 | -2.506380 |
| O | 3.263312  | -2.561241 | -2.603416 | H            | -5.306530 | -3.974667 | -2.360984 |
| O | 3.425823  | -2.917143 | 2.058855  | C            | -4.262116 | -1.891803 | 0.094887  |
| C | 2.924855  | -3.042180 | -3.892110 | C            | -3.151709 | -2.978702 | 0.129323  |
| H | 3.389990  | -4.015893 | -4.094199 | H            | -6.142775 | -1.777387 | -1.040268 |
| H | 1.835982  | -3.129580 | -4.018330 | H            | -3.021190 | -4.762482 | -1.206654 |
| H | 3.311501  | -2.304123 | -4.597372 | H            | -3.006424 | -3.391364 | 1.129979  |
| C | 3.104064  | -3.555709 | 3.282067  | C            | -4.684211 | -1.196909 | 1.349377  |
| H | 3.550382  | -2.939778 | 4.065514  | O            | -5.807814 | -0.785460 | 1.565446  |
| H | 2.016975  | -3.607402 | 3.436134  | O            | -3.660782 | -1.042429 | 2.224890  |
| H | 3.525204  | -4.568485 | 3.334357  | C            | -3.905329 | -0.138536 | 3.317196  |
| C | -1.617740 | 4.380173  | -0.331707 | H            | -4.762558 | -0.470902 | 3.909073  |
| C | -1.935920 | 5.724166  | -0.109611 | H            | -2.991749 | -0.157454 | 3.914442  |
| C | -2.272018 | 3.725488  | -1.397929 | H            | -4.081293 | 0.862023  | 2.916604  |
| C | -2.857975 | 6.393772  | -0.916364 |              |           |           |           |
| H | -1.446868 | 6.242891  | 0.709170  |              |           |           |           |
| C | -3.202388 | 4.392890  | -2.213921 | <b>Int_6</b> |           |           |           |
| C | -3.491758 | 5.731122  | -1.971391 | Pd           | -3.382246 | 0.224533  | -0.152658 |
| H | -3.083514 | 7.438144  | -0.719383 | C            | -4.939870 | 2.612451  | -0.077250 |
| H | -3.697563 | 3.849923  | -3.012583 | C            | -6.033030 | 0.690116  | 0.758655  |
| H | -4.211387 | 6.251889  | -2.595501 | C            | -6.077798 | 3.388720  | 0.122803  |
| C | 1.140274  | 3.659896  | -1.228061 | C            | -7.199667 | 1.414174  | 0.988136  |
| H | 1.988769  | 3.009999  | -1.460656 | H            | -6.046965 | 4.435606  | -0.157400 |
| H | 0.365776  | 3.429946  | -1.967413 | H            | -8.058886 | 0.893373  | 1.395859  |
| C | 1.563497  | 5.133330  | -1.378109 | N            | -4.962688 | 1.319155  | 0.259754  |
| H | 0.712135  | 5.802482  | -1.211797 | H            | -8.111913 | 3.361646  | 0.836729  |
| H | 2.348032  | 5.373240  | -0.657053 | C            | -7.211981 | 2.776678  | 0.669175  |
| H | 1.945895  | 5.318540  | -2.388970 | N            | -4.625117 | -1.230526 | 0.626990  |
| F | 1.838303  | 1.836975  | 3.269677  | N            | -2.671182 | 2.144682  | -0.685716 |
| C | -2.055183 | 2.335245  | -1.614265 | C            | -5.863695 | -0.796997 | 0.990343  |
| N | -1.943433 | 1.192494  | -1.801233 | C            | -3.637156 | 3.107788  | -0.667351 |
| C | 0.344996  | -1.222711 | 0.143694  | O            | -6.793861 | -1.452305 | 1.465442  |
| C | 1.116481  | -0.881193 | 2.322503  | O            | -3.553076 | 4.275223  | -1.058441 |
| C | 0.590133  | -1.115488 | -1.254166 | C            | -4.305508 | -2.595416 | 0.659089  |
| C | -0.845725 | -1.852341 | 0.623042  | C            | -3.172796 | -3.035395 | 1.386497  |
| C | 0.006702  | -1.542651 | 2.865306  | C            | -5.000435 | -3.528986 | -0.131003 |
|   |           |           |           | C            | -2.777994 | -4.375907 | 1.341890  |

C -4.616437 -4.874668 -0.159918  
 C -3.510653 -5.287404 0.576229  
 H -1.912145 -4.715911 1.897032  
 H -5.164998 -5.572393 -0.784412  
 H -3.200816 -6.328551 -0.548659  
 C -1.364006 2.487778 -1.076428  
 C -0.532248 3.355132 -0.324106  
 C -0.812121 1.834881 -2.188625  
 C 0.784646 3.593886 -0.781745  
 C 0.503080 1.999307 -2.588650  
 C 1.297519 2.902571 -1.887465  
 H 0.875896 1.445076 -3.442916  
 H 2.318316 3.086868 -2.209465  
 O -2.514841 -2.068217 2.086460  
 O -6.001622 -3.054472 -0.939392  
 C -1.283621 -2.407675 2.706139  
 H -1.424374 -3.147852 3.505292  
 H -0.558795 -2.789399 1.974643  
 H -0.899192 -1.479435 3.130691  
 C -7.301057 -3.606289 -0.707721  
 H -7.975685 -3.081483 -1.388170  
 H -7.332046 -4.681047 -0.933156  
 H -7.606069 -3.423878 0.326471  
 C 1.638247 4.654156 -0.165430  
 C 1.307013 6.001534 -0.369074  
 C 2.823838 4.386062 0.558732  
 C 2.095857 7.034423 0.135521  
 H 0.417619 6.227227 -0.947832  
 C 3.624411 5.426624 1.070283  
 C 3.256168 6.749543 0.861971  
 H 1.807810 8.066129 -0.045308  
 H 4.525250 5.181483 1.624136  
 H 3.871597 7.552475 1.255840  
 C -0.992397 3.856363 1.036813  
 H -1.746218 3.148294 1.399325  
 H -0.140919 3.781591 1.726822  
 C -1.580344 5.278589 1.132396  
 H -0.801796 6.040544 1.042899  
 H -2.329605 5.441764 0.356695  
 H -2.057473 5.411245 -2.110900  
 F -1.591039 0.973893 -2.877340  
 C 3.256094 3.044494 0.784553  
 N 3.648166 1.969870 0.984279  
 C -0.558435 -0.963134 -0.320346  
 C -2.194087 -2.032261 -1.602549  
 C -0.211608 0.047123 0.606056  
 C 0.450759 -1.859576 -0.800060  
 C -1.268253 -2.969744 -2.093596  
 H -3.235469 -2.071890 -1.900756  
 C 1.106615 0.247820 0.939258  
 H -0.998387 0.669712 1.017485  
 C 1.803790 -1.667149 -0.383532  
 C 0.046189 -2.883283 -1.693594  
 H -1.607345 -3.740038 -2.777300  
 C 2.135674 -0.574634 0.406779  
 H 1.356986 1.058227 1.614188  
 H 0.779797 -3.589795 -2.067512  
 H 5.673124 -0.772634 2.387949  
 N -1.855763 -1.072989 -0.748955  
 Pd 4.054717 -0.122480 0.565037  
 O 6.264361 0.449138 0.541293  
 O 6.656360 -0.828025 2.350128  
 C 7.048663 -0.166401 1.257350  
 C 8.510515 -0.289997 0.962791

H 8.605652 -1.141076 0.278054  
 H 8.859375 0.606858 0.448229  
 H 9.093449 -0.480786 1.865642  
 C 5.133744 -4.460409 0.063521  
 C 4.742859 -3.163696 0.827720  
 C 2.755559 -3.962294 0.100874  
 C 3.761541 -4.991302 -0.460803  
 H 5.860695 -4.271364 -0.728415  
 H 5.590270 -5.172706 0.760903  
 H 3.720471 -5.048496 -1.555043  
 H 3.546124 -5.993889 -0.074307  
 C 3.401890 -3.591929 1.452916  
 H 2.884292 -2.780106 1.972546  
 H 3.497558 -4.451221 2.127363  
 C 4.288900 -2.084355 -0.190555  
 C 2.904439 -2.632199 -0.705939  
 H 5.524749 -2.836761 1.512131  
 H 1.723701 -4.323018 0.144896  
 H 2.944672 -2.842085 -1.781272  
 C 5.312512 -1.786221 -1.230920  
 O 6.522836 -1.897677 -1.082921  
 O 4.776935 -1.320265 -2.392287  
 C 5.730209 -0.891265 -3.371812  
 H 6.385088 -1.716494 -3.667720  
 H 5.141942 -0.545317 -4.223167  
 H 6.346517 -0.078278 -2.975413

#### Int\_7

Pd -3.629284 -0.332900 -0.146380  
 C -6.243368 0.552560 0.559549  
 C -6.174942 -1.477078 -0.658953  
 C -7.633883 0.519133 0.603228  
 C -7.564259 -1.564021 -0.650728  
 H -8.157163 1.320809 1.112373  
 H -8.032117 -2.412747 -1.137145  
 N -5.587333 -0.436160 -0.057138  
 H -9.376831 -0.602275 0.009886  
 C -8.291749 -0.553561 -0.010941  
 N -3.930902 -2.128488 -1.121376  
 N -4.040779 1.412954 0.921786  
 C -5.229092 -2.487109 -1.284429  
 C -5.364081 1.621631 1.177728  
 O -5.684826 -3.496452 -1.829701  
 O -5.867938 2.550211 1.812347  
 C -2.865824 -2.933437 -1.560463  
 C -1.993824 -3.497534 -0.595401  
 C -2.528300 -3.045190 -2.917215  
 C -0.816040 -4.140868 -0.989555  
 C -1.369831 -3.722373 -3.316833  
 C -0.519499 -4.253682 -2.351755  
 H -0.116914 -4.516472 -0.251761  
 H -1.135647 -3.783188 -4.375396  
 H 0.398487 -4.750760 -2.653616  
 C -3.086268 2.203070 1.586916  
 C -2.324034 3.174604 0.910617  
 C -2.821999 1.966144 2.941163  
 C -1.336819 3.881742 1.625808  
 C -1.844320 2.644472 3.649784  
 C -1.100974 3.613923 2.980789  
 H -1.678251 2.407556 4.695123  
 H -0.334771 4.171824 3.511334  
 O -2.378037 -3.325477 0.698035  
 O -3.307858 -2.396063 -3.847621  
 C -1.617300 -3.966207 1.718124

|    |           |           |           |
|----|-----------|-----------|-----------|
| H  | -1.597181 | -5.053720 | 1.565242  |
| H  | -0.592947 | -3.587050 | 1.765757  |
| H  | -2.135550 | -3.739792 | 2.651945  |
| C  | -4.148387 | -3.259780 | -4.623804 |
| H  | -4.717413 | -2.609139 | -5.292966 |
| H  | -3.549463 | -3.959402 | -5.224046 |
| H  | -4.830171 | -3.810517 | -3.969241 |
| C  | -0.557405 | 4.974521  | 0.974699  |
| C  | -1.004978 | 6.299115  | 1.026515  |
| C  | 0.657335  | 4.719887  | 0.305116  |
| C  | -0.277246 | 7.331907  | 0.432886  |
| H  | -1.937046 | 6.510407  | 1.541311  |
| C  | 1.397134  | 5.757251  | -0.296221 |
| C  | 0.924358  | 7.062892  | -0.229638 |
| H  | -0.649242 | 8.351124  | 0.487574  |
| H  | 2.326494  | 5.524320  | -0.806806 |
| H  | 1.489714  | 7.866136  | -0.691970 |
| C  | -2.639152 | 3.468112  | -0.538536 |
| H  | -1.760663 | 3.888003  | -1.040809 |
| F  | -3.522481 | 0.994198  | 3.564901  |
| C  | 1.181525  | 3.396368  | 0.190459  |
| N  | 1.724470  | 2.384864  | 0.007464  |
| C  | -0.637827 | -0.471475 | 0.570763  |
| C  | -1.156210 | -0.375157 | -1.708279 |
| C  | -1.106782 | -0.583558 | 1.895210  |
| C  | 0.759512  | -0.640504 | 0.292563  |
| C  | 0.155160  | -0.711255 | -2.058884 |
| H  | -1.925828 | -0.263938 | -2.464581 |
| C  | -0.221367 | -0.949914 | 2.873665  |
| H  | -2.163203 | -0.472513 | 2.104121  |
| C  | 1.704069  | -0.757331 | 1.368651  |
| C  | 1.110451  | -0.845066 | -1.071554 |
| H  | 0.379139  | -0.921796 | -3.098062 |
| C  | 1.169681  | -1.083625 | 2.625236  |
| H  | -0.588584 | -1.161495 | 3.873514  |
| H  | 2.079589  | -1.264672 | -1.305315 |
| N  | -1.551606 | -0.294608 | -0.441720 |
| Pd | 2.944124  | 1.255246  | -1.294101 |
| C  | 6.094765  | -0.017905 | 1.511241  |
| C  | 5.122713  | 0.874583  | 0.671219  |
| C  | 3.875848  | 0.213388  | 2.430082  |
| C  | 5.241826  | -0.429400 | 2.751435  |
| H  | 6.474775  | -0.872355 | 0.949980  |
| H  | 6.962361  | 0.584908  | 1.801855  |
| H  | 5.172687  | -1.513350 | 2.884827  |
| H  | 5.650092  | -0.010900 | 3.678515  |
| C  | 4.321887  | 1.540869  | 1.798494  |
| H  | 3.500247  | 2.169392  | 1.458745  |
| H  | 4.953427  | 2.124017  | 2.479930  |
| C  | 4.031865  | 0.001205  | 0.004820  |
| C  | 3.238948  | -0.610322 | 1.238220  |
| H  | 5.632596  | 1.513519  | -0.047702 |
| H  | 3.223715  | 0.321010  | 3.290630  |
| H  | 3.629106  | -1.631269 | 1.300048  |
| C  | 4.544894  | -1.071927 | -0.921881 |
| O  | 3.912382  | -2.066390 | -1.264152 |
| O  | 5.812466  | -0.870067 | -1.321594 |
| C  | 6.296556  | -1.772012 | -2.320818 |
| H  | 5.663076  | -1.716999 | -3.210987 |
| H  | 7.308560  | -1.436335 | -2.549447 |
| H  | 6.303864  | -2.801343 | -1.950149 |
| C  | 1.959536  | -1.665266 | 3.752132  |
| C  | 2.716775  | -2.847725 | 3.602864  |
| C  | 1.925496  | -1.060476 | 5.018035  |

|   |           |           |           |
|---|-----------|-----------|-----------|
| C | 3.456547  | -3.352611 | 4.681249  |
| C | 2.641036  | -1.581013 | 6.094422  |
| H | 1.349522  | -0.147192 | 5.140607  |
| C | 3.419068  | -2.728014 | 5.925317  |
| H | 4.049187  | -4.249746 | 4.535607  |
| H | 2.599933  | -1.084756 | 7.060116  |
| H | 3.988644  | -3.134909 | 6.755686  |
| C | 2.705749  | -3.619704 | 2.320466  |
| O | 1.725509  | -3.833597 | 1.634468  |
| O | 3.938924  | -4.069486 | 2.005431  |
| C | 4.030505  | -4.783423 | 0.753262  |
| H | 5.065518  | -5.121694 | 0.693503  |
| H | 3.343973  | -5.634181 | 0.748114  |
| H | 3.794499  | -4.108211 | -0.072592 |
| C | 1.943837  | 1.194787  | -4.091184 |
| O | 1.198226  | 0.998314  | -5.185969 |
| O | 1.685026  | 2.060010  | -3.265031 |
| N | 4.011971  | 0.661725  | -2.931573 |
| C | 5.139266  | 1.378499  | -3.220860 |
| C | 5.709602  | 1.286254  | -4.642523 |
| H | 6.700455  | 1.742188  | -4.628596 |
| H | 5.792849  | 0.252184  | -4.996612 |
| H | 5.085461  | 1.836107  | -5.358199 |
| O | 5.730861  | 2.057041  | -2.380352 |
| C | 3.104354  | 0.213548  | -3.955712 |
| H | 2.668460  | -0.757777 | -3.678401 |
| H | 3.563378  | 0.070556  | -4.940445 |
| H | 0.454244  | 1.631420  | -5.154630 |
| H | -2.883314 | 2.528470  | -1.044011 |
| C | -3.828506 | 4.438023  | -0.672305 |
| H | -4.696394 | 4.063830  | -0.120352 |
| H | -3.572332 | 5.422992  | -0.264721 |
| H | -4.108138 | 4.567850  | -1.724288 |

#### **Int 8**

|    |           |           |           |
|----|-----------|-----------|-----------|
| Pd | -3.671633 | -0.168825 | 0.263560  |
| C  | -5.850374 | 0.927797  | 1.726809  |
| C  | -6.256101 | -1.211731 | 0.790386  |
| C  | -7.128415 | 0.966079  | 2.275915  |
| C  | -7.547637 | -1.227381 | 1.309617  |
| H  | -7.421969 | 1.840000  | 2.846859  |
| H  | -8.174302 | -2.090165 | 1.112944  |
| N  | -5.478552 | -0.148166 | 1.023564  |
| H  | -8.980257 | -0.118625 | 2.477722  |
| C  | -7.977194 | -0.126751 | 2.060597  |
| N  | -4.335748 | -2.018115 | -0.370848 |
| N  | -3.676502 | 1.715965  | 1.139852  |
| C  | -5.625449 | -2.306699 | -0.051127 |
| C  | -4.808023 | 2.026942  | 1.831729  |
| O  | -6.281380 | -3.310234 | -0.340704 |
| O  | -5.053133 | 3.062124  | 2.450392  |
| C  | -3.584138 | -2.826718 | -1.234057 |
| C  | -2.338885 | -3.337993 | -0.789791 |
| C  | -3.945321 | -3.006580 | -2.581071 |
| C  | -1.498757 | -4.026636 | -1.671339 |
| C  | -3.115719 | -3.715004 | -3.458288 |
| C  | -1.901407 | -4.215812 | -2.996933 |
| H  | -0.530559 | -4.382644 | -1.346614 |
| H  | -3.417612 | -3.833647 | -4.494267 |
| H  | -1.248437 | -4.758148 | -3.676523 |
| C  | -2.552511 | 2.559777  | 1.150685  |
| C  | -2.099452 | 3.169727  | -0.039388 |
| C  | -1.782101 | 2.678926  | 2.310855  |
| C  | -0.838359 | 3.806515  | -0.040961 |



|   |           |           |           |                              |           |           |           |
|---|-----------|-----------|-----------|------------------------------|-----------|-----------|-----------|
| C | -0.582793 | 3.371657  | 2.341201  | H                            | 1.849588  | -3.056827 | -4.882992 |
| C | -0.105911 | 3.920671  | 1.155178  | H                            | 1.539540  | -4.391422 | -3.722831 |
| H | -0.021408 | 3.434056  | 3.267194  | C                            | 2.982158  | -0.276336 | 2.528777  |
| O | 0.854571  | 4.424188  | 1.148260  | C                            | 3.173038  | -1.245584 | 3.539769  |
| O | -2.039611 | -3.079942 | 0.510679  | C                            | 3.940699  | 0.737707  | 2.399721  |
| O | -5.089483 | -2.393274 | 3.029700  | C                            | 4.287242  | -1.171180 | 4.389190  |
| C | -0.790227 | -3.533004 | 1.027338  | C                            | 5.062558  | 0.789078  | 3.225542  |
| H | -0.719214 | -4.628133 | 0.989212  | H                            | 3.803500  | 1.498680  | 1.643903  |
| H | -0.758597 | -3.200256 | 2.063530  | C                            | 5.238063  | -0.165453 | 4.228856  |
| C | -6.129801 | -3.279523 | -3.456640 | H                            | 4.408557  | -1.922850 | 5.161807  |
| H | -6.968187 | -2.642127 | -3.747834 | H                            | 5.790144  | 1.583841  | 3.086392  |
| H | -5.817585 | -3.879133 | -4.322918 | H                            | 6.104440  | -0.127206 | 4.882723  |
| H | -6.429998 | -3.930221 | -2.630730 | C                            | 2.267041  | -2.426042 | 3.652260  |
| C | -0.191298 | 4.269863  | -1.298744 | O                            | 1.751694  | -2.999230 | 2.708630  |
| C | -0.026645 | 3.368064  | -2.363922 | O                            | 2.104362  | -2.825967 | 4.928871  |
| C | 0.375177  | 5.557519  | -1.442300 | C                            | 1.289386  | -3.999834 | 5.105424  |
| C | 0.670575  | 3.714161  | -3.518391 | H                            | 1.284935  | -4.191645 | 6.178405  |
| H | -0.423765 | 2.364929  | -2.257209 | H                            | 0.274538  | -3.816101 | 4.742107  |
| C | 1.094251  | 5.902035  | -2.601976 | H                            | 1.713323  | -4.847318 | 4.559687  |
| C | 1.244311  | 4.984767  | -3.637521 | C                            | 3.590737  | 3.845792  | 2.210968  |
| H | 0.784429  | 2.984927  | -4.316026 | O                            | 3.087102  | 4.880130  | 0.589555  |
| H | 1.523034  | 6.896145  | -2.678014 | O                            | 4.827432  | 3.452842  | 0.608910  |
| H | 1.797140  | 5.259998  | -4.530936 | N                            | 3.628389  | 1.706689  | -1.143337 |
| C | -3.046755 | 3.195876  | -1.221750 | C                            | 4.716453  | 1.696399  | -1.907133 |
| H | -2.516475 | 3.437375  | -2.145162 | C                            | 5.279779  | 2.933418  | -2.561629 |
| F | -2.196056 | 2.033810  | 3.422195  | H                            | 5.988792  | 2.635307  | -3.336244 |
| C | 0.220444  | 6.559565  | -0.426777 | H                            | 4.488523  | 3.549741  | -3.003201 |
| N | 0.104894  | 7.408931  | 0.358935  | H                            | 5.800701  | 3.540548  | -1.813435 |
| C | -0.599706 | -0.212935 | 0.113818  | O                            | 5.281555  | 0.564675  | -2.066200 |
| C | -1.709436 | -0.288137 | -1.943937 | C                            | 2.904605  | 2.885308  | -0.754310 |
| C | -0.662714 | -0.167791 | 1.525306  | H                            | 1.969306  | 2.586027  | -0.271728 |
| C | 0.680582  | -0.270909 | -0.532511 | H                            | 2.609274  | 3.498870  | -1.614430 |
| C | -0.494689 | -0.332057 | -2.652847 | H                            | -3.498509 | 2.207258  | -1.355967 |
| H | -2.659353 | -0.326209 | -2.465541 | C                            | -4.162852 | 4.236549  | -1.000291 |
| C | 0.495748  | -0.188586 | 2.257205  | H                            | -4.696140 | 4.052916  | -0.062873 |
| H | -1.629123 | -0.106451 | 2.011966  | H                            | -3.739808 | 5.246231  | -0.949026 |
| C | 1.869758  | -0.299789 | 0.261904  | H                            | -4.883779 | 4.208004  | -1.825882 |
| C | 0.688952  | -0.317759 | -1.950715 | Pd                           | 3.634497  | -0.311188 | -0.692650 |
| H | -0.513209 | -0.384048 | -3.735917 | H                            | 0.057554  | -3.099384 | 0.490690  |
| C | 1.780014  | -0.262726 | 1.644894  | H                            | 5.144944  | 4.153035  | 1.211587  |
| H | 0.439951  | -0.137079 | 3.341270  |                              |           |           |           |
| H | 1.640302  | -0.352544 | -2.472558 |                              |           |           |           |
| N | -1.762646 | -0.214888 | -0.620153 | <b>MeCN</b>                  |           |           |           |
| C | 5.551993  | -4.299542 | -1.072973 | C                            | 0.000000  | 0.000000  | 0.280813  |
| C | 5.341553  | -2.819045 | -1.548318 | N                            | 0.000000  | 0.000000  | 1.441048  |
| C | 5.432966  | -2.618619 | 0.711387  | C                            | 0.000000  | 0.000000  | -1.181446 |
| C | 5.595976  | -4.166092 | 0.484630  | H                            | 0.000000  | 1.026922  | -1.561180 |
| H | 4.756165  | -4.966127 | -1.420137 | H                            | 0.889341  | -0.513461 | -1.561180 |
| H | 6.498662  | -4.680845 | -1.468906 | H                            | -0.889341 | -0.513461 | -1.561180 |
| H | 4.810386  | -4.741735 | 0.983618  |                              |           |           |           |
| H | 6.558968  | -4.494785 | 0.889275  | <b>methyl 2-iodobenzoate</b> |           |           |           |
| C | 6.210439  | -2.077081 | -0.506721 | C                            | -2.229576 | -2.430241 | -0.211411 |
| H | 6.192449  | -0.990975 | -0.613388 | C                            | -0.864446 | -2.144915 | -0.184435 |
| H | 7.252053  | -2.416395 | -0.523197 | C                            | -0.421021 | -0.824429 | -0.064619 |
| C | 3.925404  | -2.499620 | -1.068650 | C                            | -1.346635 | 0.228500  | 0.034302  |
| C | 3.992373  | -2.380586 | 0.311722  | C                            | -2.716866 | -0.089659 | 0.037866  |
| H | 5.540545  | -2.630418 | -2.602016 | C                            | -3.162033 | -1.399505 | -0.093210 |
| H | 5.716467  | -2.262220 | 1.702389  | H                            | -2.556163 | -3.461543 | -0.312781 |
| H | 3.149032  | -2.554651 | 0.970526  | H                            | -0.145236 | -2.953687 | -0.249571 |
| C | 2.691917  | -2.961523 | -1.764695 | H                            | -3.420056 | 0.729494  | 0.145773  |
| O | 1.712691  | -3.410938 | -1.203557 | H                            | -4.226482 | -1.614044 | -0.098796 |
| O | 2.793110  | -2.839759 | -3.103242 | I                            | 1.717785  | -0.591500 | 0.085515  |
| C | 1.647058  | -3.309105 | -3.842053 | C                            | -1.049908 | 1.694351  | 0.150122  |
| H | 0.734175  | -2.825951 | -3.485908 | O                            | -1.767002 | 2.472654  | 0.748289  |
|   |           |           |           | O                            | 0.047419  | 2.066118  | -0.526284 |

C 0.391533 3.457825 -0.428515  
H -0.405312 4.078365 -0.848122  
H 0.548788 3.740279 0.616184  
H 1.312193 3.568880 -1.001641

**NBE-CO2Me**

C -2.430656 -0.305266 -1.098666  
C -2.003679 -1.101535 0.188337  
C -1.060908 0.928238 0.506289  
C -1.781136 1.096530 -0.873530  
H -2.086732 -0.794966 -2.014379  
H -3.523102 -0.238067 -1.147166  
H -1.077959 1.376891 -1.662669  
H -2.542306 1.881670 -0.810246  
C -2.074722 0.026867 1.249120  
H -1.723719 -0.291421 2.236039  
H -3.072512 0.472723 1.340480  
C -0.502090 -1.281082 0.082167  
C 0.061013 -0.072295 0.273365  
H -2.586608 -2.006991 0.370485  
H -0.757448 1.862949 0.978319  
H 0.009425 -2.189412 -0.216182  
C 1.466780 0.321145 0.111650  
O 1.863116 1.472610 0.134171  
O 2.287498 -0.745078 -0.066469  
C 3.674114 -0.419706 -0.235525  
H 4.056914 0.112034 0.640896  
H 4.187384 -1.374409 -0.358743  
H 3.819457 0.211364 -1.117699

**quinoline**

C 2.398979 -0.716999 -0.000001  
C 1.206140 -1.405629 -0.000002  
C -0.029306 -0.704849 0.000007  
C -0.014350 0.727490 0.000005  
C 1.231511 1.408578 0.000000  
C 2.412988 0.701198 0.000000  
H 3.340163 -1.260096 -0.000001  
H 1.169965 -2.490532 -0.000004  
C -1.266192 1.395231 0.000000  
H 1.235485 2.496254 -0.000006  
H 3.363299 1.227898 0.000001  
C -2.424053 0.653723 -0.000002  
C -2.325509 -0.762186 0.000005  
H -1.292159 2.482647 -0.000001  
H -3.401115 1.127389 -0.000011  
H -3.235731 -1.362045 -0.000010  
N -1.188736 -1.428693 -0.000004

**T1\_conf\_1**

Pd 1.064459 0.500673 0.307788  
C 0.782789 3.320746 0.148877  
C 2.969834 2.515258 -0.278252  
C 1.189765 4.633722 -0.064145  
C 3.435345 3.808502 -0.499435  
H 0.454375 5.425225 0.028072  
H 4.481236 3.943305 -0.752069  
N 1.683138 2.335390 0.039483  
H 2.872481 5.888212 -0.557054  
C 2.531575 4.870704 -0.387919  
N 3.047994 0.137350 -0.127722  
N 0.353150 -1.425047 0.486571  
N -0.707051 1.529481 0.644444  
C -0.083595 -2.492862 0.536413

C -0.635008 -3.838310 0.590362  
H -0.818417 -4.119967 1.632271  
H -1.581872 -3.863995 0.037513  
H 0.076728 -4.542309 0.147441  
C 3.800892 1.250140 -0.367613  
C -0.624989 2.879942 0.500578  
O 5.002922 1.318173 -0.616101  
O -1.527473 3.711765 0.616288  
C 3.604615 -1.145917 -0.209796  
C 4.150855 -1.641240 -1.412640  
C 3.530054 -2.004856 0.906358  
C 4.650955 -2.949108 -1.479824  
C 3.997258 -3.322460 0.832442  
C 4.564715 -3.774199 -0.359620  
H 5.086118 -3.329237 -2.396312  
H 3.950518 -3.979050 1.693117  
H 4.947030 -4.789897 -0.416044  
C -1.900271 0.890711 1.026540  
C -3.013550 0.754713 0.170154  
C -1.923095 0.243841 2.269453  
C -4.107018 -0.024275 0.602082  
C -2.994128 -0.522302 2.700872  
C -4.092391 -0.652256 1.855101  
H -2.956375 -0.994927 3.676688  
H -4.944903 -1.250817 2.162784  
O 4.115591 -0.780957 -2.464599  
O 2.970151 -1.451081 2.022310  
C 4.830583 -1.121157 -3.638971  
H 5.890397 -1.308417 -3.421624  
H 4.402055 -2.002005 -4.138104  
H 4.744402 -0.257544 -4.301076  
C 2.644457 -2.298865 3.106515  
H 2.113674 -1.672368 3.825886  
H 1.989122 -3.123660 2.789270  
H 3.540827 -2.720075 3.582030  
C -5.290135 -0.250501 -0.280276  
C -6.312073 0.698593 -0.393464  
C -5.417093 -1.450315 -1.015705  
C -7.423516 0.467373 -1.205095  
H -6.223172 1.625586 0.165059  
C -6.536803 -1.687032 -1.832125  
C -7.538373 -0.726031 -1.924435  
H -8.203904 1.219963 -1.275082  
H -6.607150 -2.617532 -2.386590  
H -8.403802 -0.905448 -2.555165  
C -2.961899 1.353062 -1.219615  
H -3.977894 1.471938 -1.608159  
H -2.531621 2.356030 -1.164307  
C -2.150684 0.475604 -2.192300  
H -1.120517 0.355585 -1.842822  
H -2.593795 -0.522594 -2.283664  
H -2.123095 0.930110 -3.189323  
F -0.837860 0.345658 3.066416  
C -4.380749 -2.439022 -0.939606  
N -3.543842 -3.244950 -0.891542

**T1\_conf\_2**

Pd 1.000364 0.555311 0.238032  
C 0.842104 3.357175 -0.208318  
C 2.984003 2.414080 -0.572779  
C 1.305691 4.623995 -0.547116  
C 3.503992 3.656348 -0.924785  
H 0.608858 5.454354 -0.520169  
H 4.551008 3.716961 -1.200414

|                  |           |           |           |   |           |           |           |
|------------------|-----------|-----------|-----------|---|-----------|-----------|-----------|
| N                | 1.693302  | 2.324413  | -0.232081 | C | -0.945336 | 3.371250  | -0.318692 |
| H                | 3.036471  | 5.745671  | -1.175278 | C | -2.979832 | 2.297249  | -0.895177 |
| C                | 2.651623  | 4.765981  | -0.906553 | C | -1.422302 | 4.593636  | -0.780032 |
| N                | 2.973936  | 0.071620  | -0.135727 | C | -3.512410 | 3.494613  | -1.364929 |
| N                | 0.343151  | -1.349296 | 0.661011  | H | -0.770279 | 5.458419  | -0.726232 |
| N                | -0.729636 | 1.681521  | 0.424951  | H | -4.517469 | 3.487462  | -1.772031 |
| C                | 0.215599  | -2.484906 | 0.826401  | N | -1.739458 | 2.295458  | -0.393325 |
| C                | 0.118852  | -3.923112 | 1.020328  | H | -3.117005 | 5.592340  | -1.662254 |
| H                | 1.058187  | -4.381523 | 0.693158  | C | -2.721938 | 4.647619  | -1.299500 |
| H                | -0.039303 | -4.144754 | 2.080674  | N | -2.871702 | -0.037577 | -0.427215 |
| H                | -0.729790 | -4.300107 | 0.443291  | N | -0.337057 | -1.211818 | 0.966472  |
| C                | 3.759315  | 1.111099  | -0.538261 | N | 0.583003  | 1.824038  | 0.647054  |
| C                | -0.577952 | 3.014107  | 0.195322  | C | -0.060992 | -2.295480 | 1.252836  |
| O                | 4.951867  | 1.092364  | -0.835901 | C | 0.251506  | -3.680064 | 1.570152  |
| O                | -1.438038 | 3.894487  | 0.259775  | H | 1.209873  | -3.936748 | 1.106975  |
| C                | 3.470072  | -1.238034 | -0.092401 | H | 0.315589  | -3.814195 | 2.654415  |
| C                | 3.852883  | -1.919305 | -1.266483 | H | -0.546236 | -4.315570 | 1.170580  |
| C                | 3.472276  | -1.937443 | 1.131650  | C | -3.666603 | 0.943530  | -0.942454 |
| C                | 4.252751  | -3.262300 | -1.211371 | C | 0.442441  | 3.113806  | 0.241907  |
| C                | 3.845463  | -3.287352 | 1.187320  | O | -4.784646 | 0.835188  | -1.441544 |
| C                | 4.240309  | -3.930209 | 0.012285  | O | 1.285135  | 4.012349  | 0.263433  |
| H                | 4.559035  | -3.787334 | -2.108114 | C | -3.270481 | -1.381076 | -0.417036 |
| H                | 3.860761  | -3.823983 | 2.128590  | C | -4.370805 | -1.822922 | 0.346029  |
| H                | 4.550326  | -4.971029 | 0.053537  | C | -2.482480 | -2.337363 | -1.093134 |
| C                | -1.959144 | 1.180369  | 0.894124  | C | -4.688887 | -3.187513 | 0.410299  |
| C                | -2.884081 | 0.559084  | 0.032247  | C | -2.776538 | -3.704137 | -1.002229 |
| C                | -2.235299 | 1.232759  | 2.264960  | C | -3.885911 | -4.110333 | -0.257956 |
| C                | -4.065429 | 0.018317  | 0.581297  | H | -5.540128 | -3.531588 | 0.985476  |
| C                | -3.395540 | 0.708747  | 2.813249  | H | -2.178674 | -4.438487 | -1.529233 |
| C                | -4.313089 | 0.101939  | 1.958213  | H | -4.131311 | -5.167593 | -0.202569 |
| H                | -3.563026 | 0.780043  | 3.882647  | C | 1.794834  | 1.308630  | 1.140340  |
| H                | -5.229869 | -0.319335 | 2.360767  | C | 2.864168  | 0.951147  | 0.292381  |
| O                | 3.765016  | -1.192115 | -2.410957 | C | 1.869880  | 0.981932  | 2.499668  |
| O                | 3.067550  | -1.207621 | 2.210855  | C | 3.957878  | 0.253142  | 0.842942  |
| C                | 4.274438  | -1.752025 | -3.608641 | C | 2.952065  | 0.313706  | 3.051522  |
| H                | 5.335444  | -2.016487 | -3.507895 | C | 3.997504  | -0.056124 | 2.209460  |
| H                | 3.706942  | -2.641634 | -3.916802 | H | 2.957544  | 0.088394  | 4.112695  |
| H                | 4.166143  | -0.976609 | -4.369184 | H | 4.850638  | -0.595649 | 2.610645  |
| C                | 2.914084  | -1.866823 | 3.453351  | O | -5.039442 | -0.847843 | 1.015075  |
| H                | 2.534233  | -1.113492 | 4.145752  | O | -1.433162 | -1.825615 | -1.801332 |
| H                | 2.191562  | -2.693874 | 3.386681  | C | -6.254029 | -1.182608 | 1.662563  |
| H                | 3.868907  | -2.258351 | 3.830186  | H | -6.977229 | -1.615528 | 0.958701  |
| C                | -5.097903 | -0.625884 | -0.282127 | H | -6.094237 | -1.883444 | 2.494422  |
| C                | -6.295173 | 0.039663  | -0.569521 | H | -6.649838 | -0.244516 | 2.055889  |
| C                | -4.922170 | -1.923742 | -0.814325 | C | -0.471600 | -2.718373 | -2.336011 |
| C                | -7.280299 | -0.550344 | -1.363358 | H | 0.298637  | -2.089952 | -2.785625 |
| H                | -6.441363 | 1.037282  | -0.166433 | H | -0.012137 | -3.336540 | -1.552000 |
| C                | -5.911266 | -2.518815 | -1.616320 | H | -0.904433 | -3.372329 | -3.104960 |
| C                | -7.088718 | -1.829746 | -1.890942 | C | 5.077256  | -0.226578 | -0.020981 |
| H                | -8.197747 | -0.007772 | -1.573758 | C | 6.169213  | 0.592823  | -0.326681 |
| H                | -5.747720 | -3.516418 | -2.011743 | C | 5.068852  | -1.539888 | -0.542896 |
| H                | -7.852432 | -2.288976 | -2.511289 | C | 7.218231  | 0.129868  | -1.122494 |
| C                | -2.622938 | 0.579196  | -1.457552 | H | 6.184655  | 1.604495  | 0.067543  |
| H                | -1.544823 | 0.517834  | -1.632668 | C | 6.125397  | -2.009415 | -1.343068 |
| H                | -3.075275 | -0.292664 | -1.939366 | C | 7.198228  | -1.171981 | -1.631333 |
| C                | -3.174783 | 1.865900  | -2.101867 | H | 8.054574  | 0.786507  | -1.345302 |
| H                | -4.266684 | 1.904480  | -2.008396 | H | 6.092708  | -3.022748 | -1.730863 |
| H                | -2.763391 | 2.752504  | -1.609632 | H | 8.014543  | -1.532174 | -2.250097 |
| H                | -2.923313 | 1.903484  | -3.168308 | C | 2.779775  | 1.260096  | -1.188525 |
| F                | -1.329166 | 1.808886  | 3.078592  | H | 2.328689  | 2.247119  | -1.321004 |
| C                | -3.724933 | -2.661234 | -0.532899 | H | 3.790680  | 1.324773  | -1.604101 |
| N                | -2.767468 | -3.286030 | -0.321523 | C | 1.980177  | 0.207218  | -1.979799 |
| <b>T1_conf_3</b> |           |           |           | H | 2.438942  | -0.783500 | -1.894177 |
| Pd               | -1.040005 | 0.597432  | 0.273279  | H | 0.953017  | 0.132415  | -1.610404 |

H 1.941774 0.476165 -3.041984  
 F 0.829586 1.300812 3.294574  
 C 3.963108 -2.411637 -0.266552  
 N 3.073185 -3.134100 -0.069454  
**T1\_conf\_4**  
 Pd 1.010450 0.578728 0.196705  
 C 1.011829 3.345942 -0.438221  
 C 3.027299 2.206414 -0.948173  
 C 1.541678 4.551459 -0.885977  
 C 3.610594 3.383844 -1.407889  
 H 0.919054 5.438256 -0.844257  
 H 4.628362 3.343715 -1.779995  
 N 1.769345 2.243261 -0.493130  
 H 3.290835 5.491540 -1.725251  
 C 2.855218 4.561288 -1.371659  
 N 2.858918 -0.109619 -0.413082  
 N 0.331488 -1.188280 1.010076  
 N -0.603766 1.846454 0.464562  
 C 0.201756 -2.261257 1.416116  
 C 0.092775 -3.632517 1.888106  
 H 0.083710 -3.658391 2.982055  
 H -0.832765 -4.062127 1.495080  
 H 0.956791 -4.192728 1.513768  
 C 3.685743 0.838666 -0.939154  
 C -0.390961 3.140124 0.101644  
 O 4.815190 0.693177 -1.401993  
 O -1.192359 4.075357 0.133118  
 C 3.234925 -1.457632 -0.341609  
 C 2.440462 -2.426404 -0.992367  
 C 4.310434 -1.888365 0.462350  
 C 2.705445 -3.793675 -0.838980  
 C 4.599767 -3.254997 0.589874  
 C 3.792033 -4.189961 -0.056407  
 H 2.100380 -4.536627 -1.345317  
 H 5.432748 -3.590884 1.195777  
 H 4.016398 -5.248422 0.046228  
 C -1.849947 1.434904 0.971285  
 C -2.756537 0.704665 0.174467  
 C -2.163740 1.679155 2.312169  
 C -3.951194 0.237144 0.760981  
 C -3.342415 1.236274 2.893385  
 C -4.235503 0.513202 2.106764  
 H -3.539903 1.455264 3.937309  
 H -5.162751 0.148498 2.539441  
 O 1.414056 -1.925166 -1.737956  
 O 4.982443 -0.899912 1.108154  
 C 0.403399 -2.811103 -2.192447  
 H 0.791179 -3.528357 -2.928480  
 H -0.064329 -3.353467 -1.360614  
 H -0.350327 -2.180015 -2.666867  
 C 6.181892 -1.228450 1.786352  
 H 6.587279 -0.282224 2.149234  
 H 5.999014 -1.893985 2.642196  
 H 6.907889 -1.699627 1.110587  
 C -4.969167 -0.519798 -0.023469  
 C -6.202951 0.071228 -0.322980  
 C -4.756758 -1.849254 -0.458155  
 C -7.186066 -0.617402 -1.035002  
 H -6.378367 1.091305 0.005117  
 C -5.744672 -2.543496 -1.178543  
 C -6.957488 -1.925962 -1.467615  
 H -8.130885 -0.129076 -1.256773  
 H -5.552156 -3.562661 -1.498892  
 H -7.719285 -2.462835 -2.024695

C -2.461879 0.548100 -1.302144  
 H -1.387086 0.397641 -1.443492  
 H -2.961662 -0.336269 -1.706168  
 C -2.915100 1.791351 -2.092269  
 H -4.004880 1.901765 -2.040961  
 H -2.468373 2.701711 -1.681193  
 H -2.630948 1.703920 -3.147516  
 F -1.279317 2.360270 3.063656  
 C -3.528132 -2.527085 -0.162701  
 N -2.548536 -3.115511 0.053773  
**T1\_conf\_5**  
 Pd -1.127887 0.389009 0.026886  
 C -0.493945 3.141906 -0.251617  
 C -2.745201 2.591137 -0.737816  
 C -0.733435 4.488219 -0.507790  
 C -3.044756 3.923210 -1.006941  
 H 0.085430 5.189744 -0.393389  
 H -4.060570 4.175999 -1.290010  
 N -1.495960 2.265605 -0.385866  
 H -2.234469 5.918783 -1.097310  
 C -2.023340 4.873087 -0.892498  
 N -3.129356 0.253645 -0.475668  
 N -0.894880 -1.595830 0.533488  
 N 0.756688 1.200694 0.348611  
 C -1.083833 -2.696563 0.826925  
 C -1.398510 -4.074602 1.175370  
 H -0.701442 -4.760824 0.684631  
 H -1.334811 -4.213369 2.258997  
 H -2.419525 -4.285813 0.837057  
 C -3.728800 1.438865 -0.787451  
 C 0.826246 2.553990 0.204705  
 O -4.902411 1.637328 -1.093327  
 O 1.791266 3.292642 0.402254  
 C -3.879388 -0.925853 -0.378388  
 C -4.853017 -1.095094 0.628905  
 C -3.581086 -2.012814 -1.224997  
 C -5.529144 -2.316003 0.768376  
 C -4.239647 -3.242317 -1.075536  
 C -5.213898 -3.373835 -0.083117  
 H -6.286016 -2.447098 1.532178  
 H -4.028602 -4.073296 -1.738233  
 H -5.742514 -4.317605 0.021833  
 C 1.861304 0.455580 0.807749  
 C 2.997599 0.175939 0.016663  
 C 1.767430 -0.120641 2.082529  
 C 4.001402 -0.664733 0.550286  
 C 2.750715 -0.935627 2.615732  
 C 3.875565 -1.199838 1.838938  
 H 2.629899 -1.340230 3.614946  
 H 4.664929 -1.834169 2.230965  
 O -5.038627 -0.020682 1.437798  
 O -2.610110 -1.771332 -2.152315  
 C -6.109715 -0.046682 2.366187  
 H -7.071667 -0.209585 1.862744  
 H -5.965802 -0.820338 3.133685  
 H -6.112642 0.934715 2.843521  
 C -2.208595 -2.831570 -2.999334  
 H -1.420632 -2.423784 -3.635052  
 H -1.807232 -3.680098 -2.425223  
 H -3.035365 -3.187077 -3.629127  
 C 5.210926 -1.038115 -0.241288  
 C 5.105350 -1.881283 -1.355191  
 C 6.500959 -0.594129 0.127991  
 C 6.228464 -2.263445 -2.088045

H 4.121876 -2.244885 -1.638515  
 C 7.634760 -0.982288 -0.608133  
 C 7.497640 -1.812502 -1.715665  
 H 6.114087 -2.918946 -2.947038  
 H 8.612244 -0.622312 -0.303095  
 H 8.374995 -2.107938 -2.283329  
 C 3.142992 0.804705 -1.354556  
 H 3.473146 0.049890 -2.076496  
 H 2.162422 1.151940 -1.691863  
 C 4.138213 1.980901 -1.364033  
 H 3.822387 2.743387 -0.649352  
 H 5.146230 1.645337 -1.098545  
 H 4.184020 2.430311 -2.363121  
 F 0.656430 0.118844 2.813408  
 C 6.681828 0.270860 1.259084  
 N 6.871097 0.966860 2.171456  
**Tl\_conf\_6**  
 Pd 1.098941 0.403561 0.261451  
 C 0.455998 3.165041 0.363725  
 C 2.739851 2.694601 -0.053467  
 C 0.693799 4.534650 0.304826  
 C 3.037400 4.052031 -0.127325  
 H -0.140577 5.211008 0.453635  
 H 4.062941 4.345081 -0.322947  
 N 1.478253 2.319776 0.188699  
 H 2.209417 6.038000 0.005432  
 C 1.999911 4.973342 0.056515  
 N 3.137240 0.345251 -0.071526  
 N 0.805125 -1.637466 0.243151  
 N -0.816076 1.156982 0.563224  
 C 0.921674 -2.784306 0.179401  
 C 1.148007 -4.220214 0.097732  
 H 2.228580 -4.390391 0.028035  
 H 0.757487 -4.716324 0.991670  
 H 0.653255 -4.633640 -0.786425  
 C 3.735572 1.562785 -0.215918  
 C -0.890648 2.516181 0.611782  
 O 4.921935 1.804746 -0.426178  
 O -1.883553 3.218093 0.812014  
 C 3.873870 -0.840034 -0.197669  
 C 4.449685 -1.225101 -1.426163  
 C 3.952115 -1.724912 0.897692  
 C 5.110635 -2.456577 -1.547443  
 C 4.590265 -2.967459 0.774205  
 C 5.170630 -3.312562 -0.448801  
 H 5.566160 -2.751483 -2.485072  
 H 4.671051 -3.639584 1.620621  
 H 5.686835 -4.264290 -0.542988  
 C -1.941676 0.339670 0.788684  
 C -3.047783 0.267829 -0.089743  
 C -1.905487 -0.512456 1.900567  
 C -4.086727 -0.645096 0.205734  
 C -2.919234 -1.407349 2.197767  
 C -4.016672 -1.460983 1.345284  
 H -2.844062 -2.029548 3.083174  
 H -4.828491 -2.149568 1.558068  
 O 4.278523 -0.344235 -2.445527  
 O 3.348514 -1.282264 2.037358  
 C 4.979192 -0.566242 -3.657460  
 H 6.062271 -0.626956 -3.488193  
 H 4.639357 -1.480863 -4.163932  
 H 4.759803 0.295791 -4.289887  
 C 3.276952 -2.153175 3.150842  
 H 2.710681 -1.615659 3.913122

H 2.751098 -3.086977 2.901614  
 H 4.273443 -2.399538 3.541772  
 C -5.277706 -0.801349 -0.679210  
 C -5.139646 -1.258088 -1.997460  
 C -6.586279 -0.537707 -0.210978  
 C -6.245009 -1.439362 -2.827203  
 H -4.143222 -1.477718 -2.366985  
 C -7.702125 -0.725044 -1.046719  
 C -7.531863 -1.172647 -2.352448  
 H -6.102036 -1.794520 -3.844081  
 H -8.693295 -0.510138 -0.659992  
 H -8.396227 -1.313218 -2.994610  
 C -3.086224 1.168281 -1.308649  
 H -4.093227 1.166608 -1.734241  
 H -2.890593 2.194532 -0.985462  
 C -2.075945 0.768565 -2.400768  
 H -1.052279 0.779038 -2.015364  
 H -2.278516 -0.238471 -2.784507  
 H -2.131223 1.466024 -3.244634  
 F -0.825584 -0.465599 2.713150  
 C -6.813807 -0.064148 1.124982  
 N -7.046737 0.311128 2.201004  
**Tl\_conf\_7**  
 Pd 1.129932 0.398971 0.211223  
 C 0.466526 3.158145 0.241561  
 C 2.749574 2.694037 -0.184965  
 C 0.692499 4.527341 0.144128  
 C 3.035025 4.051291 -0.300315  
 H -0.144920 5.201152 0.287281  
 H 4.056352 4.346817 -0.513497  
 N 1.493137 2.315961 0.077750  
 H 2.192462 6.033650 -0.214259  
 C 1.992115 4.969207 -0.131641  
 N 3.169721 0.349387 -0.126829  
 N 0.857179 -1.643749 0.268994  
 N -0.787677 1.144513 0.493725  
 C 0.991762 -2.790351 0.247792  
 C 1.241655 -4.224424 0.218731  
 H 2.324409 -4.378957 0.145848  
 H 0.867501 -4.692468 1.134557  
 H 0.746623 -4.679841 -0.644395  
 C 3.754739 1.566905 -0.317595  
 C -0.869534 2.504269 0.532179  
 O 4.937283 1.813358 -0.544331  
 O -1.857480 3.201628 0.763159  
 C 3.919174 -0.831136 -0.216355  
 C 4.496078 -1.250116 -1.433281  
 C 4.013042 -1.677423 0.907959  
 C 5.172922 -2.476190 -1.515491  
 C 4.667758 -2.914701 0.824094  
 C 5.248488 -3.293466 -0.388728  
 H 5.629171 -2.796546 -2.444397  
 H 4.761138 -3.556329 1.692601  
 H 5.777286 -4.240794 -0.452493  
 C -1.904323 0.334173 0.780797  
 C -2.987044 0.153595 -0.108072  
 C -1.875526 -0.407751 1.970140  
 C -4.005189 -0.761654 0.245527  
 C -2.874291 -1.295897 2.329085  
 C -3.946246 -1.463747 1.456541  
 H -2.805971 -1.830376 3.270566  
 H -4.745730 -2.152995 1.711287  
 O 4.310393 -0.406648 -2.481271  
 O 3.407427 -1.204890 2.034637

|                                      |           |           |           |    |           |           |           |
|--------------------------------------|-----------|-----------|-----------|----|-----------|-----------|-----------|
| C                                    | 5.016763  | -0.655723 | -3.684585 | C  | 1.879724  | -4.237881 | -3.947210 |
| H                                    | 6.100229  | -0.695167 | -3.511613 | H  | 1.840796  | -5.331639 | -3.866831 |
| H                                    | 4.691556  | -1.590425 | -4.163277 | H  | 0.941683  | -3.872404 | -4.389798 |
| H                                    | 4.786107  | 0.183014  | -4.343772 | H  | 2.713980  | -3.951170 | -4.589782 |
| C                                    | 3.357442  | -2.036677 | 3.178721  | C  | 0.532244  | -3.177105 | 3.037408  |
| H                                    | 2.788297  | -1.481213 | 3.925881  | H  | 1.095234  | -2.701637 | 3.843027  |
| H                                    | 2.844623  | -2.986908 | 2.966880  | H  | -0.400512 | -2.619175 | 2.869800  |
| H                                    | 4.360427  | -2.253667 | 3.570481  | H  | 0.290897  | -4.208907 | 3.326943  |
| C                                    | -5.157353 | -1.040787 | -0.661883 | C  | 1.165022  | 4.722585  | -0.259019 |
| C                                    | -4.965480 | -1.717212 | -1.873770 | C  | -0.065312 | 4.239014  | -0.720755 |
| C                                    | -6.478002 | -0.677599 | -0.312960 | C  | 1.571960  | 6.012183  | -0.666660 |
| C                                    | -6.034150 | -2.014944 | -2.718606 | C  | -0.875169 | 5.002128  | -1.564398 |
| H                                    | -3.957799 | -2.018388 | -2.144998 | H  | -0.397473 | 3.249430  | -0.417070 |
| C                                    | -7.556895 | -0.980655 | -1.162785 | C  | 0.757665  | 6.785142  | -1.513641 |
| C                                    | -7.334365 | -1.644957 | -2.364370 | C  | -0.458811 | 6.277843  | -1.958296 |
| H                                    | -5.853078 | -2.541785 | -3.651482 | H  | -1.829748 | 4.604386  | -1.899797 |
| H                                    | -8.559631 | -0.685758 | -0.870097 | H  | 1.093064  | 7.773373  | -1.813383 |
| H                                    | -8.169648 | -1.874899 | -3.019101 | H  | -1.087415 | 6.875650  | -2.612198 |
| C                                    | -3.063184 | 0.962462  | -1.387160 | C  | 2.973503  | 2.615348  | -1.345927 |
| H                                    | -2.072007 | 1.366224  | -1.611674 | H  | 3.054508  | 1.538499  | -1.528443 |
| H                                    | -3.332377 | 0.310247  | -2.224951 | H  | 2.085242  | 2.969779  | -1.876446 |
| C                                    | -4.081901 | 2.114929  | -1.296252 | C  | 4.228000  | 3.318525  | -1.901892 |
| H                                    | -5.095337 | 1.731935  | -1.136159 | H  | 4.149452  | 4.404183  | -1.779734 |
| H                                    | -3.822424 | 2.777976  | -0.468565 | H  | 5.125800  | 2.991267  | -1.368006 |
| H                                    | -4.082752 | 2.694876  | -2.226785 | H  | 4.351799  | 3.099738  | -2.969176 |
| F                                    | -0.813497 | -0.258219 | 2.792969  | F  | 4.139351  | 1.526244  | 3.264655  |
| C                                    | -6.747317 | 0.016119  | 0.914452  | C  | 2.828493  | 6.549256  | -0.230119 |
| N                                    | -7.007992 | 0.572744  | 1.901827  | N  | 3.843320  | 7.009463  | 0.105121  |
| <b>Norbornene_Ins_no_CN_MPAAs_TS</b> |           |           |           | C  | 0.304621  | -0.398575 | -0.171598 |
| Pd                                   | 3.306889  | -0.870301 | 0.258565  | C  | 1.124774  | 0.119581  | 1.955380  |
| C                                    | 6.111569  | -0.477476 | 0.061684  | C  | 0.565363  | -0.724341 | -1.527867 |
| C                                    | 5.381255  | -2.668549 | -0.469418 | C  | -1.042787 | -0.212072 | 0.267330  |
| C                                    | 7.437077  | -0.825436 | -0.178535 | C  | -0.164305 | 0.407541  | 2.435596  |
| C                                    | 6.687731  | -3.074691 | -0.726840 | H  | 1.992299  | 0.208972  | 2.598561  |
| H                                    | 8.203341  | -0.068871 | -0.050395 | C  | -0.480062 | -0.868348 | -2.410636 |
| H                                    | 6.860386  | -4.099842 | -1.035060 | H  | 1.592398  | -0.875607 | -1.842755 |
| N                                    | 5.159489  | -1.405176 | -0.092526 | C  | -2.121386 | -0.472713 | -0.646959 |
| H                                    | 8.745146  | -2.433530 | -0.770004 | C  | -1.241914 | 0.224712  | 1.597896  |
| C                                    | 7.717765  | -2.138721 | -0.575810 | H  | -0.285759 | 0.763708  | 3.452616  |
| N                                    | 3.006066  | -2.864945 | -0.241738 | C  | -1.816777 | -0.770625 | -1.966348 |
| N                                    | 4.260521  | 0.923719  | 0.604984  | H  | -0.277396 | -1.104982 | -3.450751 |
| C                                    | 4.145142  | -3.539993 | -0.585975 | H  | -2.249733 | 0.428149  | 1.937248  |
| C                                    | 5.616928  | 0.894838  | 0.485730  | H  | -2.617314 | -0.969405 | -2.671601 |
| O                                    | 4.251509  | -4.711868 | -0.943679 | N  | 1.351256  | -0.270173 | 0.707506  |
| O                                    | 6.410838  | 1.819304  | 0.651481  | Pd | -3.986905 | 0.398368  | -0.260739 |
| C                                    | 1.762965  | -3.494997 | -0.384990 | C  | -5.685554 | -3.645384 | 0.323752  |
| C                                    | 1.307405  | -3.926449 | -1.650075 | C  | -5.687832 | -2.169108 | -0.166805 |
| C                                    | 0.897902  | -3.628874 | 0.721469  | C  | -3.752945 | -2.970384 | -1.042442 |
| C                                    | 0.066548  | -4.561696 | -1.789753 | C  | -4.330479 | -4.185017 | -0.232827 |
| C                                    | -0.359536 | -4.233944 | 0.580969  | H  | -5.761764 | -3.722154 | 1.413115  |
| C                                    | -0.748249 | -4.715836 | -0.670249 | H  | -6.536836 | -4.186327 | -0.102676 |
| H                                    | -0.266231 | -4.924827 | -2.754742 | H  | -3.647124 | -4.517103 | 0.554896  |
| H                                    | -1.009228 | -4.373409 | 1.437284  | H  | -4.477694 | -5.029326 | -0.913913 |
| H                                    | -1.700699 | -5.227439 | -0.771598 | C  | -5.055339 | -2.331984 | -1.567086 |
| C                                    | 3.574501  | 2.074002  | 1.038330  | H  | -4.902411 | -1.382975 | -2.090288 |
| C                                    | 2.828087  | 2.863462  | 0.138321  | H  | -5.626982 | -3.008859 | -2.210525 |
| C                                    | 3.492740  | 2.350011  | 2.405870  | C  | -4.543608 | -1.472585 | 0.594912  |
| C                                    | 2.016494  | 3.895913  | 0.647924  | C  | -3.324846 | -2.016925 | 0.053945  |
| C                                    | 2.722510  | 3.382639  | 2.918241  | H  | -6.653059 | -1.668229 | -0.113657 |
| C                                    | 1.982220  | 4.154428  | 2.025508  | H  | -2.975388 | -3.239744 | -1.755036 |
| H                                    | 2.702826  | 3.558193  | 3.988697  | H  | -2.499714 | -2.307633 | 0.692010  |
| H                                    | 1.362216  | 4.964769  | 2.397213  | C  | -4.668541 | -1.206188 | 2.042002  |
| O                                    | 2.136123  | -3.637944 | -2.688802 | O  | -5.677333 | -0.750975 | 2.577779  |
| O                                    | 1.375750  | -3.134726 | 1.900655  | O  | -3.565832 | -1.499656 | 2.751177  |

C -3.588243 -1.129759 4.144493  
H -4.371454 -1.679215 4.671838  
H -2.602386 -1.394860 4.526510  
H -3.769890 -0.056508 4.248582  
N -5.825328 1.541953 -0.331777  
C -7.039740 1.358177 0.074571  
C -8.227019 2.152589 -0.412691  
H -8.177795 3.179464 -0.031969  
H -8.247353 2.210283 -1.504995  
H -9.145729 1.689907 -0.050149  
O -7.397512 0.447443 0.968096  
C -5.599263 2.652762 -1.274098  
H -6.065333 3.578686 -0.922532  
H -6.042716 2.417853 -2.251593  
C -4.117198 2.975886 -1.533447  
O -3.231695 2.131169 -1.099897  
O -3.874735 4.004188 -2.156704  
H -6.645259 0.025390 1.469018

**Norbornene\_Ins\_no\_CN\_OAc\_TS**

Pd 3.022005 -0.852985 0.053858  
C 5.817562 -0.704558 -0.451332  
C 4.907903 -2.891491 -0.530332  
C 7.085131 -1.184531 -0.765842  
C 6.150864 -3.429195 -0.852398  
H 7.904565 -0.477938 -0.837983  
H 6.229080 -4.501044 -0.996854  
N 4.802487 -1.570557 -0.347190  
H 8.222824 -2.959185 -1.216527  
C 7.242941 -2.561037 -0.968822  
N 2.572997 -2.874543 -0.017064  
N 4.120011 0.903024 0.032522  
C 3.627164 -3.683063 -0.335476  
C 5.460097 0.743753 -0.173866  
O 3.637637 -4.907921 -0.441348  
O 6.328404 1.613346 -0.169751  
C 1.312061 -3.429041 0.243948  
C 0.575621 -4.087621 -0.762645  
C 0.714205 -3.247218 1.509076  
C -0.696848 -4.609053 -0.493160  
C -0.571535 -3.738946 1.774225  
C -1.252546 -4.432262 0.773473  
H -1.252998 -5.142194 -1.254951  
H -1.023818 -3.619034 2.751169  
H -2.232565 -4.848766 0.986967  
C 3.597265 2.090323 0.569836  
C 2.602619 2.818115 -0.119230  
C 3.938364 2.471012 1.873943  
C 1.936162 3.866695 0.551013  
C 3.325386 3.532178 2.523049  
C 2.313446 4.218316 1.856892  
H 3.629698 3.791125 3.531539  
H 1.801374 5.035098 2.355948  
O 1.175509 -4.127729 -1.982894  
O 1.470871 -2.564221 2.417098  
C 0.551455 -4.866745 -3.017222  
H 0.422447 -5.920577 -2.738240  
H -0.426559 -4.441132 -3.285993  
H 1.220973 -4.800878 -3.876771  
C 0.925551 -2.318666 3.701642  
H 1.690215 -1.761480 4.246422  
H 0.009627 -1.713994 3.641067  
H 0.709298 -3.253122 4.236392  
C 0.790683 4.585970 -0.074086

C -0.368713 3.883994 -0.434196  
C 0.811441 5.981602 -0.299393  
C -1.463012 4.524509 -1.013190  
H -0.406015 2.812625 -0.258561  
C -0.297722 6.633406 -0.869527  
C -1.427077 5.905585 -1.228907  
H -2.326775 3.934524 -1.303304  
H -0.252047 7.705359 -1.034794  
H -2.274961 6.412282 -1.681467  
C 2.369218 2.486006 -1.577742  
H 2.307635 1.399957 -1.701423  
H 1.421947 2.902141 -1.925933  
C 3.515722 3.032395 -2.451128  
H 3.550518 4.126383 -2.398289  
H 4.483941 2.651150 -2.112232  
H 3.372403 2.744009 -3.499159  
F 4.864979 1.746281 2.532875  
C 1.967789 6.765679 0.028397  
N 2.883924 7.435756 0.283531  
C 0.016205 -0.430049 -0.361839  
C 0.879195 0.496022 1.602826  
C 0.252758 -0.985909 -1.642924  
C -1.326460 -0.207689 0.082400  
C -0.408236 0.796117 2.083146  
H 1.761193 0.754252 2.177498  
C -0.809452 -1.330777 -2.445450  
H 1.275396 -1.163743 -1.955851  
C -2.419865 -0.625485 -0.754216  
C -1.505131 0.418921 1.340299  
H -0.514902 1.305469 3.034618  
C -2.138605 -1.180336 -1.993767  
H -0.625354 -1.756286 -3.427306  
H -2.509538 0.598112 1.704938  
H -2.944016 -1.520080 -2.634520  
N 1.086088 -0.113458 0.443938  
Pd -4.191074 0.501472 -0.646864  
O -3.747922 2.337174 -1.815512  
O -5.692583 2.025361 -0.820508  
C -4.915040 2.755641 -1.522838  
C -5.361480 4.123714 -1.968596  
H -4.906380 4.873946 -1.310312  
H -5.013341 4.316476 -2.986958  
H -6.447749 4.215052 -1.908762  
C -6.329249 -3.116845 0.605260  
C -6.126582 -1.832544 -0.253074  
C -4.161515 -2.929676 -0.539404  
C -4.956812 -3.844923 0.453207  
H -6.587959 -2.883177 1.640532  
H -7.146134 -3.714418 0.187485  
H -4.432232 -3.968445 1.406152  
H -5.068870 -4.840827 0.012691  
C -5.311387 -2.406428 -1.429167  
H -5.011005 -1.647493 -2.157508  
H -5.835221 -3.212337 -1.953599  
C -5.065670 -1.015377 0.492454  
C -3.807460 -1.708003 0.297640  
H -7.038329 -1.282369 -0.482134  
H -3.311693 -3.415697 -1.016175  
H -3.108943 -1.822218 1.120057  
C -5.481291 -0.387533 1.779158  
O -6.637705 -0.236486 2.111089  
O -4.431723 -0.009161 2.554300  
C -4.787565 0.653176 3.781764  
H -5.397203 -0.003713 4.407610

H -3.841484 0.884432 4.272651  
H -5.348470 1.567584 3.571033

**Norbornene\_Ins\_with\_CN\_OAc\_TS**

Pd 3.285114 -0.339512 0.489469  
C 5.747151 1.056583 0.285086  
C 5.875028 -1.266420 -0.183775  
C 7.113297 1.208248 0.068880  
C 7.244164 -1.174379 -0.418991  
H 7.551343 2.194254 0.176922  
H 7.783864 -2.071696 -0.700995  
N 5.204636 -0.159751 0.154522  
H 8.927639 0.170702 -0.458577  
C 7.859615 0.075989 -0.283703  
N 3.731160 -2.295532 0.048267  
N 3.495909 1.707348 0.738084  
C 5.028891 -2.524971 -0.308101  
C 4.770862 2.169579 0.635732  
O 5.538931 -3.576614 -0.687123  
O 5.172805 3.328324 0.762930  
C 2.724734 -3.249061 -0.157670  
C 2.354996 -3.644326 -1.459974  
C 1.944360 -3.690875 0.930453  
C 1.265271 -4.499079 -1.667879  
C 0.837700 -4.525229 0.725500  
C 0.518138 -4.926849 -0.571540  
H 0.984979 -4.811841 -2.666352  
H 0.237838 -4.870567 1.558676  
H -0.331269 -5.585965 -0.730194  
C 2.402882 2.552224 1.005366  
C 1.671661 3.186393 -0.023467  
C 1.915781 2.625064 2.315727  
C 0.499699 3.897207 0.315146  
C 0.745131 3.285769 2.651699  
C 0.038474 3.929576 1.638477  
H 0.408041 3.293256 3.682538  
H -0.871382 4.472682 1.876295  
O 3.091375 -3.083750 -2.461109  
O 2.333939 -3.223765 2.152770  
C 2.839144 -3.494116 -3.793074  
H 2.984843 -4.575364 -3.915804  
H 1.821271 -3.228781 -4.114166  
H 3.562781 -2.960260 -4.411934  
C 1.563827 -3.588289 3.284902  
H 2.042831 -3.104414 4.138566  
H 0.528207 -3.230308 3.198789  
H 1.560384 -4.675294 3.441803  
C -0.238781 4.697960 -0.707374  
C 0.278032 5.931861 -1.124352  
C -1.478135 4.295895 -1.253229  
C -0.396049 6.731058 -2.047416  
H 1.218538 6.265594 -0.698622  
C -2.165152 5.102322 -2.182314  
C -1.620891 6.317526 -2.579288  
H 0.032564 7.683359 -2.346578  
H -3.116742 4.762904 -2.579298  
H -2.149498 6.939462 -3.295061  
C 2.127585 3.033022 -1.459708  
H 2.527540 2.019662 -1.578018  
H 1.260589 3.112591 -2.125604  
C 3.203621 4.045475 -1.895355  
H 2.793703 5.059895 -1.937691  
H 4.044734 4.050106 -1.197739  
H 3.576133 3.794638 -2.895618

F 2.595342 1.971636 3.286331  
C -2.086150 3.047602 -0.909994  
N -2.664300 2.061189 -0.720310  
C 0.314958 -0.677220 -0.105127  
C 0.852480 -0.416887 2.156915  
C 0.741842 -0.776130 -1.453435  
C -1.080400 -0.720151 0.205718  
C -0.497932 -0.481020 2.538948  
H 1.633580 -0.259215 2.890861  
C -0.193375 -0.878645 -2.457458  
H 1.804562 -0.789192 -1.670680  
C -2.031214 -0.791581 -0.863738  
C -1.462819 -0.625114 1.567216  
H -0.761193 -0.388777 3.587053  
C -1.577413 -0.880719 -2.166886  
H 0.134580 -0.952913 -3.490895  
H -2.514208 -0.647523 1.831165  
H -2.284116 -0.940730 -2.987771  
N 1.244437 -0.512909 0.892495  
Pd -3.799436 0.260172 -0.458952  
O -4.796490 1.398803 2.027013  
O -5.536992 1.370428 -0.100230  
C -5.641278 1.668565 1.159014  
C -6.955071 2.338840 1.535444  
H -7.680778 1.543935 1.745786  
H -6.826700 2.941993 2.437610  
H -7.344846 2.948770 0.716459  
C -6.222965 -3.345829 -1.098651  
C -5.864752 -1.841829 -1.287398  
C -3.915536 -2.879497 -1.810541  
C -4.867301 -4.059119 -1.403698  
H -6.607673 -3.552272 -0.096924  
H -6.995882 -3.638846 -1.817079  
H -4.478115 -4.624143 -0.550249  
H -4.952945 -4.756195 -2.243611  
C -4.919344 -1.929595 -2.503756  
H -4.493177 -0.963258 -2.790419  
H -5.394332 -2.386248 -3.378541  
C -4.885759 -1.519137 -0.155423  
C -3.648929 -2.165342 -0.497855  
H -6.712317 -1.161191 -1.346734  
H -3.026689 -3.187544 -2.361711  
H -3.029325 -2.623817 0.264350  
C -5.426527 -1.463488 1.233710  
O -6.602652 -1.298109 1.484399  
O -4.474406 -1.649752 2.175124  
C -4.890880 -1.362539 3.526024  
H -5.738002 -1.993581 3.806452  
H -4.022510 -1.585965 4.147949  
H -5.159120 -0.305856 3.590487

**Norbornene\_Ins\_with\_CN\_MPAA\_TS**

Pd 3.719231 -0.183527 0.395467  
C 6.038401 1.428640 0.105159  
C 6.341272 -0.861799 -0.434781  
C 7.372215 1.705568 -0.178436  
C 7.682204 -0.643862 -0.739568  
H 7.728227 2.723575 -0.065719  
H 8.281333 -1.483270 -1.074901  
N 5.596951 0.172771 -0.029794  
H 9.237957 0.845033 -0.830778  
C 8.193547 0.652351 -0.602037  
N 4.311029 -2.079958 -0.120335  
N 3.766654 1.870886 0.689275



|   |           |           |           |    |           |           |           |
|---|-----------|-----------|-----------|----|-----------|-----------|-----------|
| C | 5.602522  | -2.186899 | -0.548575 | C  | -0.609729 | -0.889641 | 0.278173  |
| C | 4.991148  | 2.442976  | 0.537835  | C  | 0.050379  | -0.694271 | 2.594503  |
| O | 6.181157  | -3.181330 | -0.980135 | H  | 2.174772  | -0.336716 | 2.870514  |
| O | 5.300759  | 3.627991  | 0.683038  | C  | 0.175669  | -0.921483 | -2.419561 |
| C | 3.383201  | -3.117436 | -0.286549 | H  | 2.195718  | -0.733202 | -1.710883 |
| C | 2.966827  | -3.519142 | -1.572424 | C  | -1.596396 | -0.981452 | -0.754460 |
| C | 2.717068  | -3.647941 | 0.837334  | C  | -0.943082 | -0.866349 | 1.656139  |
| C | 1.946259  | -4.464653 | -1.732381 | H  | -0.174277 | -0.658874 | 3.655003  |
| C | 1.679688  | -4.576252 | 0.681849  | C  | -1.194267 | -1.008374 | -2.075764 |
| C | 1.314340  | -4.980551 | -0.602122 | H  | 0.465654  | -0.950579 | -3.466730 |
| H | 1.630170  | -4.782591 | -2.718401 | H  | -1.979648 | -0.969371 | 1.960109  |
| H | 1.167252  | -4.989633 | 1.541874  | H  | -1.931707 | -1.080557 | -2.869132 |
| H | 0.518668  | -5.710720 | -0.723516 | N  | 1.722866  | -0.550364 | 0.881419  |
| C | 2.626727  | 2.616625  | 1.040667  | Pd | -3.418322 | -0.074270 | -0.242189 |
| C | 1.807230  | 3.243575  | 0.075992  | C  | -5.655982 | -3.819806 | -0.881541 |
| C | 2.196494  | 2.595647  | 2.372860  | C  | -5.436037 | -2.283489 | -1.021429 |
| C | 0.607767  | 3.855412  | 0.499645  | C  | -3.443580 | -3.136597 | -1.698602 |
| C | 1.000958  | 3.157306  | 2.790782  | C  | -4.271328 | -4.407387 | -1.298510 |
| C | 0.206852  | 3.796544  | 1.841492  | H  | -5.961484 | -4.095867 | 0.130383  |
| H | 0.712391  | 3.094205  | 3.834353  | H  | -6.447091 | -4.145579 | -1.565341 |
| H | -0.725862 | 4.263345  | 2.144176  | H  | -3.787021 | -4.976688 | -0.498112 |
| O | 3.584455  | -2.875379 | -2.603936 | H  | -4.352511 | -5.070246 | -2.166331 |
| O | 3.140942  | -3.169141 | 2.043590  | C  | -4.557459 | -2.243574 | -2.290990 |
| C | 3.265785  | -3.266747 | -3.927197 | H  | -4.217335 | -1.236452 | -2.555535 |
| H | 3.489765  | -4.327821 | -4.098798 | H  | -5.044137 | -2.699156 | -3.160145 |
| H | 2.207895  | -3.079047 | -4.161783 | C  | -4.420405 | -1.923734 | 0.068302  |
| H | 3.893789  | -2.656010 | -4.578651 | C  | -3.163982 | -2.461484 | -0.369291 |
| C | 2.484158  | -3.624933 | 3.213565  | H  | -6.343791 | -1.686297 | -0.996990 |
| H | 2.973205  | -3.115421 | 4.046393  | H  | -2.566801 | -3.347079 | -2.311440 |
| H | 1.416649  | -3.363302 | 3.204224  | H  | -2.470362 | -2.900317 | 0.338119  |
| H | 2.590180  | -4.710435 | 3.342853  | C  | -4.871521 | -1.998498 | 1.490608  |
| C | -0.232588 | 4.643536  | -0.451449 | O  | -6.035596 | -1.973080 | 1.824904  |
| C | 0.156493  | 5.940306  | -0.812037 | O  | -3.841319 | -2.173801 | 2.351886  |
| C | -1.448736 | 4.160057  | -0.982523 | C  | -4.192395 | -2.056642 | 3.743825  |
| C | -0.618058 | 6.722793  | -1.668241 | H  | -4.940528 | -2.807090 | 4.013187  |
| H | 1.077672  | 6.335199  | -0.396410 | H  | -3.263461 | -2.227880 | 4.290918  |
| C | -2.237160 | 4.948591  | -1.843852 | H  | -4.576676 | -1.051006 | 3.924174  |
| C | -1.818145 | 6.228019  | -2.187255 | C  | -7.183332 | 1.073997  | -1.122052 |
| H | -0.287317 | 7.724979  | -1.925626 | O  | -7.681585 | 1.662153  | -2.244135 |
| H | -3.167149 | 4.545550  | -2.232810 | O  | -7.745648 | 0.161150  | -0.562679 |
| H | -2.424123 | 6.836436  | -2.851481 | N  | -5.106800 | 1.044888  | 0.278728  |
| C | 2.205040  | 3.190007  | -1.384526 | C  | -5.278019 | 1.206415  | 1.604617  |
| H | 2.690935  | 2.224795  | -1.564945 | C  | -6.487175 | 1.995548  | 2.104682  |
| H | 1.302643  | 3.212807  | -2.006699 | H  | -6.515113 | 1.922198  | 3.192754  |
| C | 3.158986  | 4.317134  | -1.823671 | H  | -6.420413 | 3.055992  | 1.828280  |
| H | 2.654619  | 5.288873  | -1.803927 | H  | -7.414018 | 1.590285  | 1.686083  |
| H | 4.028797  | 4.372911  | -1.164524 | O  | -4.480408 | 0.718107  | 2.428408  |
| H | 3.504134  | 4.142009  | -2.849558 | C  | -5.883428 | 1.752234  | -0.699163 |
| F | 2.964323  | 1.951542  | 3.281589  | H  | -5.289405 | 1.899910  | -1.609406 |
| C | -1.927141 | 2.845654  | -0.685774 | H  | -6.168223 | 2.766580  | -0.375848 |
| N | -2.402710 | 1.801232  | -0.523487 | H  | -8.526869 | 1.212039  | -2.432276 |
| C | 0.767135  | -0.749826 | -0.084985 |    |           |           |           |
| C | 1.376574  | -0.524334 | 2.162673  |    |           |           |           |
| C | 1.144036  | -0.788495 | -1.450953 |    |           |           |           |

## II. Fukui Indices

### Computational Methods

All calculations were carried out using the Gaussian 09 suite of quantum chemical programs<sup>7</sup>. Gas phase geometry optimizations were performed at the B3LYP level of theory<sup>8-11</sup> using 6-311++G\*\* basis set<sup>12-13,21</sup> for all atoms. Natural population analysis was performed to calculate condensed Fukui indices using 'pop=nbo' keyword.

## Discussion

Condensed Fukui Indices

$$f_A^- = P_A(N) - P_A(N-1)$$

where,

$f_A^-$  = Nucleophilic Fukui function of Atom A

$P_A(N)$  = Electron density at atom A in a neutral molecule with N electrons

$P_A(N-1)$  = Electron density at atom A in a cationic molecule with (N-1) electrons

**Table 11.** Condensed Fukui indices calculated at the B3LYP/6-311++G\*\* level of theory.

|                                                                                                               | Atom (A) | $P_A(N)$ | $P_A(N-1)$ | $f_A^-$  |
|---------------------------------------------------------------------------------------------------------------|----------|----------|------------|----------|
| 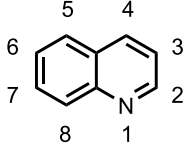 <p><b>1e(Quinoline)</b></p> | C5       | -0.17787 | 0.15622    | -0.33409 |
|                                                                                                               | C6       | -0.19750 | -0.03425   | -0.16325 |
|                                                                                                               | C7       | -0.19446 | -0.04110   | -0.15336 |
|                                                                                                               | C8       | -0.18032 | 0.15942    | -0.33974 |
|  <p><b>isoquinoline</b></p> | C5       | -0.18248 | 0.11687    | -0.29935 |
|                                                                                                               | C6       | -0.18325 | -0.08775   | -0.0955  |
|                                                                                                               | C7       | -0.20380 | 0.01115    | -0.21495 |
|                                                                                                               | C8       | -0.16291 | 0.07910    | -0.24201 |
|  <p><b>1a</b></p>          | C5       | -0.16968 | 0.10546    | -0.27514 |
|                                                                                                               | C6       | -0.19160 | -0.10357   | -0.08803 |
|                                                                                                               | C7       | -0.20772 | 0.02309    | -0.23081 |
|                                                                                                               | C8       | -0.16284 | 0.02309    | -0.18593 |
|  <p><b>1b</b></p>          | C5       | -0.16692 | 0.08583    | -0.25275 |
|                                                                                                               | C6       | -0.18513 | -0.10589   | -0.07924 |
|                                                                                                               | C7       | -0.20123 | 0.02198    | -0.22321 |
|                                                                                                               | C8       | -0.16074 | 0.02224    | -0.18298 |
|  <p><b>1c</b></p>          | C5       | -0.16478 | 0.09517    | -0.25995 |
|                                                                                                               | C6       | -0.19440 | -0.09673   | -0.09767 |
|                                                                                                               | C7       | -0.20034 | 0.01437    | -0.21471 |
|                                                                                                               | C8       | -0.17061 | 0.04923    | -0.21984 |

|                                                                                                      |    |          |          |          |
|------------------------------------------------------------------------------------------------------|----|----------|----------|----------|
| 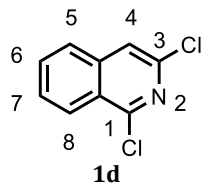 <p><b>1d</b></p>   | C5 | -0.16619 | -0.06993 | -0.09626 |
|                                                                                                      | C6 | -0.18111 | -0.10470 | -0.07641 |
|                                                                                                      | C7 | -0.19380 | 0.02318  | -0.21698 |
|                                                                                                      | C8 | -0.16131 | 0.02381  | -0.18512 |
|  <p><b>1f</b></p>   | C5 | -0.17697 | 0.13274  | -0.30971 |
|                                                                                                      | C6 | -0.20221 | 0.00556  | -0.20777 |
|                                                                                                      | C7 | -0.19480 | -0.08036 | -0.11444 |
|                                                                                                      | C8 | -0.18236 | 0.16342  | -0.34578 |
|  <p><b>1g</b></p>  | C5 | -0.17259 | 0.00624  | -0.17883 |
|                                                                                                      | C6 | -0.21094 | 0.08094  | -0.29188 |
|                                                                                                      | C7 | -0.18947 | -0.13911 | -0.05036 |
|                                                                                                      | C8 | -0.18931 | 0.10216  | -0.29147 |
|  <p><b>1h</b></p> | C5 | -0.17402 | 0.10371  | -0.27773 |
|                                                                                                      | C6 | -0.19683 | 0.04152  | -0.23835 |
|                                                                                                      | C7 | -0.18766 | -0.10972 | -0.07794 |
|                                                                                                      | C8 | -0.18175 | 0.15465  | -0.3364  |
|  <p><b>1i</b></p> | C5 | -0.16559 | 0.15746  | -0.32305 |
|                                                                                                      | C6 | -0.20561 | -0.08778 | -0.11783 |
|                                                                                                      | C7 | -0.19885 | 0.00719  | -0.20604 |
|                                                                                                      | C8 | -0.17961 | 0.11713  | -0.29674 |
|  <p><b>1j</b></p> | C5 | -0.17783 | 0.05937  | -0.2372  |
|                                                                                                      | C6 | -0.19638 | -0.11872 | -0.07766 |
|                                                                                                      | C7 | -0.20492 | 0.01902  | -0.22394 |
|                                                                                                      | C8 | -0.16573 | 0.00085  | -0.16658 |

|                                                                                                      |    |          |          |          |
|------------------------------------------------------------------------------------------------------|----|----------|----------|----------|
| 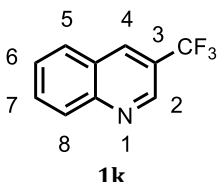 <p><b>1k</b></p>   | C5 | -0.15577 | 0.17022  | -0.32599 |
|                                                                                                      | C6 | -0.20083 | -0.02856 | -0.17227 |
|                                                                                                      | C7 | -0.18195 | -0.04610 | -0.13585 |
|                                                                                                      | C8 | -0.18071 | 0.16829  | -0.349   |
|  <p><b>1l</b></p>   | C5 | -0.16105 | 0.08985  | -0.2509  |
|                                                                                                      | C6 | -0.20536 | -0.07248 | -0.13288 |
|                                                                                                      | C7 | -0.18997 | -0.03258 | -0.15739 |
|                                                                                                      | C8 | -0.18080 | 0.07829  | -0.25909 |
|  <p><b>1m</b></p>   | C5 | -0.16895 | 0.15754  | -0.32649 |
|                                                                                                      | C6 | -0.19124 | -0.07038 | -0.12086 |
|                                                                                                      | C7 | -0.17933 | -0.00375 | -0.17558 |
|                                                                                                      | C8 | -0.18063 | 0.13338  | -0.31401 |
|  <p><b>1n</b></p> | C5 | -0.17429 | 0.07087  | -0.24516 |
|                                                                                                      | C6 | -0.20051 | 0.00011  | -0.20062 |
|                                                                                                      | C7 | -0.19359 | -0.09034 | -0.10325 |
|                                                                                                      | C8 | -0.18301 | 0.10271  | -0.28572 |
|  <p><b>1o</b></p> | C5 | -0.15705 | 0.04488  | -0.20193 |
|                                                                                                      | C6 | -0.27009 | -0.16048 | -0.10961 |
|                                                                                                      | C8 | -0.23084 | 0.13953  | -0.37037 |
|                                                                                                      |    |          |          |          |
|  <p><b>1p</b></p> | C5 | -0.21336 | 0.14832  | -0.36168 |
|                                                                                                      | C6 | -0.18358 | -0.06525 | -0.11833 |
|                                                                                                      | C7 | -0.28741 | -0.02037 | -0.26704 |
|                                                                                                      |    |          |          |          |
|                                                                                                      |    |          |          |          |

|                                                                                                      |    |          |          |          |
|------------------------------------------------------------------------------------------------------|----|----------|----------|----------|
| 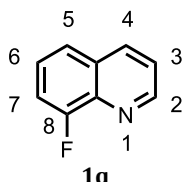 <p><b>1q</b></p>   | C5 | -0.19403 | 0.16070  | -0.35473 |
|                                                                                                      | C6 | -0.18278 | -0.03972 | -0.14306 |
|                                                                                                      | C7 | -0.26434 | -0.05062 | -0.21372 |
|                                                                                                      |    |          |          |          |
|  <p><b>1r</b></p>   | C5 | -0.18897 | 0.13020  | -0.31917 |
|                                                                                                      | C6 | -0.18882 | 0.00257  | -0.19139 |
|                                                                                                      | C7 | -0.19180 | -0.08044 | -0.11136 |
|                                                                                                      | C8 | -0.18445 | 0.15521  | -0.33966 |
|  <p><b>1s</b></p>   | C5 | -0.16139 | 0.14673  | -0.30812 |
|                                                                                                      | C6 | -0.20498 | -0.03010 | -0.17488 |
|                                                                                                      | C7 | -0.19226 | -0.05257 | -0.13969 |
|                                                                                                      | C8 | -0.18065 | 0.14854  | -0.32919 |
|  <p><b>1t</b></p> | C5 | -0.21533 | 0.15261  | -0.36794 |
|                                                                                                      | C6 | -0.18286 | -0.07547 | -0.10739 |
|                                                                                                      | C7 | -0.29172 | -0.00994 | -0.28178 |
|                                                                                                      |    |          |          |          |
|  <p><b>1u</b></p> | C5 | -0.18230 | 0.04825  | -0.23055 |
|                                                                                                      | C6 | -0.19330 | -0.11423 | -0.07907 |
|                                                                                                      | C7 | -0.19767 | 0.01657  | -0.21424 |
|                                                                                                      | C8 | -0.17777 | -0.01668 | -0.16109 |
|  <p><b>1v</b></p> | C5 | -0.17637 | 0.14828  | -0.32465 |
|                                                                                                      | C6 | -0.21201 | -0.08683 | -0.12518 |
|                                                                                                      | C7 | -0.19974 | -0.00116 | -0.19858 |
|                                                                                                      | C8 | -0.18362 | 0.11241  | -0.29603 |
|                                                                                                      |    |          |          |          |
|                                                                                                      |    |          |          |          |

|                                                                                                       |    |          |          |          |
|-------------------------------------------------------------------------------------------------------|----|----------|----------|----------|
| 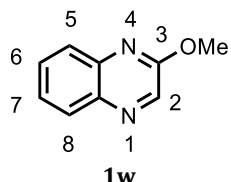 <p><b>1w</b></p>    | C5 | -0.19745 | 0.04256  | -0.24001 |
|                                                                                                       | C6 | -0.18784 | -0.13588 | -0.05196 |
|                                                                                                       | C7 | -0.20669 | 0.12848  | -0.33517 |
|                                                                                                       | C8 | -0.17510 | -0.04467 | -0.13043 |
|                                                                                                       |    |          |          |          |
|  <p><b>1x</b></p>    | C4 | -0.23965 | -0.13103 | -0.10862 |
|                                                                                                       | C5 | -0.19916 | 0.18280  | -0.38196 |
|                                                                                                       | C6 | -0.21161 | -0.08396 | -0.12765 |
|                                                                                                       | C7 | -0.19386 | -0.02768 | -0.16618 |
|                                                                                                       |    |          |          |          |
|  <p><b>1y</b></p>    | C4 | -0.21427 | 0.13467  | -0.34894 |
|                                                                                                       | C5 | -0.19789 | -0.05377 | -0.14412 |
|                                                                                                       | C6 | -0.20689 | -0.04013 | -0.16676 |
|                                                                                                       | C7 | -0.18468 | 0.14517  | -0.32985 |
|                                                                                                       |    |          |          |          |
|  <p><b>1z</b></p>  | C4 | -0.24873 | 0.12658  | -0.37531 |
|                                                                                                       | C5 | -0.17681 | -0.11119 | -0.06562 |
|                                                                                                       | C6 | -0.24821 | 0.01865  | -0.26686 |
|                                                                                                       |    |          |          |          |
|                                                                                                       |    |          |          |          |
|  <p><b>1aa</b></p> | C4 | -0.18333 | 0.07838  | -0.26171 |
|                                                                                                       | C5 | -0.21868 | -0.01340 | -0.20528 |
|                                                                                                       | C6 | -0.20621 | -0.06594 | -0.14027 |
|                                                                                                       | C7 | -0.19916 | 0.09783  | -0.29699 |
|                                                                                                       |    |          |          |          |
|  <p><b>1ab</b></p> | C5 | -0.24418 | 0.12611  | -0.37029 |
|                                                                                                       | C6 | -0.34441 | -0.07098 | -0.27343 |
|                                                                                                       |    |          |          |          |
|                                                                                                       |    |          |          |          |
|                                                                                                       |    |          |          |          |

|                                                                                                     |    |          |          |          |
|-----------------------------------------------------------------------------------------------------|----|----------|----------|----------|
| 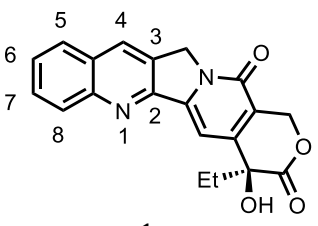 <p><b>1ac</b></p> | C5 | -0.17946 | -0.08973 | -0.08973 |
|                                                                                                     | C6 | -0.19038 | -0.01761 | -0.17277 |
|                                                                                                     | C7 | -0.19010 | -0.09985 | -0.09025 |
|                                                                                                     | C8 | -0.18020 | -0.04854 | -0.13166 |
|                                                                                                     |    |          |          |          |

## Cartesian Coordinate

### 1e (quinoline)

E= -402.031136013 H= -401.888466 G= -401.927271

N 1.188459 -1.423921 0.000001  
 C 2.323768 -0.760404 0.000006  
 C 2.419696 0.652527 0.000000  
 C 1.264190 1.392012 0.000000  
 C -1.230989 1.405539 -0.000001  
 C -2.409709 0.699451 -0.000002  
 C -2.394852 -0.716049 -0.000004  
 C -1.204791 -1.403193 -0.000002  
 C 0.028953 -0.703690 0.000003  
 C 0.014020 0.725939 0.000001  
 H 3.231852 -1.358859 -0.000003  
 H 3.394428 1.125493 -0.000003  
 H 1.291724 2.476998 -0.000002  
 H -1.237115 2.490705 -0.000001  
 H -3.357998 1.224703 -0.000003  
 H -3.333602 -1.258419 -0.000006  
 H -1.170220 -2.485960 -0.000004

### isoquinoline

E= -402.029227393 H= -401.886447 G= -401.925312

C 1.266610 -1.358372 0.000025  
 N 2.427965 -0.743370 0.000005  
 C 2.417281 0.617841 -0.000019  
 C 1.271307 1.373714 -0.000006  
 C -1.231808 1.413432 -0.000004  
 C -2.412584 0.709679 -0.000004  
 C -2.411841 -0.706395 -0.000003  
 C -1.224311 -1.397672 0.000000  
 C 0.008361 -0.698381 0.000009  
 C 0.009917 0.727336 0.000000  
 H 1.289567 -2.446928 0.000002  
 H 3.393481 1.091970 -0.000009  
 H 1.327562 2.456725 -0.000003  
 H -1.235759 2.498116 -0.000008  
 H -3.358230 1.240093 -0.000007  
 H -3.354787 -1.240868 -0.000002  
 H -1.215186 -2.482616 0.000005

### 1a

E= -441.359070433 H= -441.188391 G= -441.229691

C -2.933989 0.381161 -0.000099  
 C -1.876345 1.257232 -0.000147  
 C -0.544893 0.768713 -0.000074  
 C -0.306626 -0.636660 0.000041  
 C -1.421225 -1.517785 0.000081  
 C -2.700714 -1.017410 0.000012  
 H -3.952333 0.752683 -0.000151  
 C 1.039818 -1.069247 0.000115

H -1.247736 -2.588635 0.000169  
 H -3.546550 -1.696016 0.000046  
 C 2.068409 -0.149764 0.000082  
 H 1.259221 -2.132312 0.000200  
 H -2.044279 2.329372 -0.000232  
 N 1.835743 1.195016 -0.000034  
 C 0.590455 1.617610 -0.000105  
 H 0.443550 2.696711 -0.000192  
 C 3.515221 -0.578070 0.000107  
 H 3.749771 -1.182218 0.881856  
 H 3.750016 -1.181454 -0.882103  
 H 4.157469 0.302079 0.000561

### 1b

E= -2975.57295368 H= -2975.439078 G= -2975.482693

C 3.974718 0.157508 0.000136  
 C 3.014003 1.139109 0.000159  
 C 1.639645 0.790833 0.000098  
 C 1.258843 -0.584192 0.000009  
 C 2.274836 -1.576180 -0.000015  
 C 3.598806 -1.208933 0.000047  
 H 5.025721 0.422044 0.000185  
 C -0.124904 -0.886182 -0.000052  
 H 1.992037 -2.623098 -0.000085  
 H 4.369800 -1.971214 0.000030  
 C -1.015496 0.159636 -0.000022  
 H -0.465944 -1.913166 -0.000122  
 H 3.293098 2.187452 0.000225  
 N -0.681715 1.456668 0.000062  
 C 0.600567 1.755601 0.000121  
 H 0.851661 2.813970 0.000190  
 Br -2.903442 -0.217025 -0.000107

### 1c

E= -441.359146950 H= -441.187292 G= -441.229782

C 2.299490 1.187441 0.000083  
 C 0.950914 1.459623 0.000089  
 C -0.001244 0.407514 0.000023  
 C 0.465349 -0.940809 -0.000055  
 C 1.861887 -1.191202 -0.000063  
 C 2.758497 -0.149768 0.000005  
 H 3.017046 2.000086 0.000137  
 C -0.503038 -1.975743 -0.000121  
 H 2.210200 -2.218635 -0.000125  
 H 3.824203 -0.349615 -0.000001  
 C -1.831241 -1.640919 -0.000106  
 H -0.192751 -3.014738 -0.000183  
 H 0.611916 2.488075 0.000148  
 N -2.289116 -0.361013 -0.000033  
 C -1.419492 0.630515 0.000032

H -2.598548 -2.408915 -0.000156  
C -1.987580 2.027266 0.000114  
H -1.667485 2.590950 0.882176  
H -1.667454 2.591074 -0.881857  
H -3.074564 1.965300 0.000092

**1d**

E= -1321.27748369 H= -1321.151607 G= -1321.197129

C 3.278965 -0.426230 0.000074  
C 2.318174 0.556239 0.000099  
C 0.944694 0.209986 0.000042  
C 0.566673 -1.169179 -0.000045  
C 1.585864 -2.157131 -0.000069  
C 2.909636 -1.791785 -0.000010  
H 4.328260 -0.155542 0.000120  
C -0.810544 -1.500097 -0.000106  
H 1.300972 -3.203264 -0.000136  
H 3.681041 -2.553428 -0.000028  
C -1.719473 -0.474594 -0.000079  
H -1.132267 -2.532864 -0.000174  
H 2.599111 1.600752 0.000164  
N -1.392697 0.826475 0.000004  
C -0.132935 1.143545 0.000062  
Cl -3.439198 -0.826976 -0.000158  
Cl 0.223048 2.869006 0.000171

**1f**

E= -441.362583719 H= -441.191058 G= -441.234308

C -2.626957 -1.088559 0.000065  
C -1.320958 -1.519423 0.000093  
C -0.255395 -0.584395 0.000044  
C -0.562367 0.809773 -0.000054  
C -1.918001 1.224007 -0.000082  
C -2.930509 0.293621 -0.000021  
H -3.435211 -1.811447 0.000111  
C 0.532185 1.710627 -0.000112  
H -2.143114 2.285806 -0.000153  
H -3.965810 0.615110 -0.000041  
C 1.809777 1.218985 -0.000080  
H 0.345779 2.780056 -0.000182  
H -1.068367 -2.573177 0.000157  
C 2.022116 -0.190954 0.000005  
H 2.663517 1.887741 -0.000121  
N 1.026871 -1.053688 0.000068  
C 3.426403 -0.738186 0.000064  
H 3.979415 -0.397107 -0.881261  
H 3.979388 -0.396995 0.881363  
H 3.398538 -1.827142 0.000134

**1g**

E= -516.593324084 H= -516.415881 G= -516.461000

C 3.062524 -1.038400 -0.000084  
C 1.769213 -1.504876 -0.000047  
C 0.678278 -0.597368 0.000027  
C 0.953519 0.804976 0.000045  
C 2.297787 1.254723 0.000032  
C 3.333671 0.351124 -0.000033  
H 3.888472 -1.741130 -0.000171  
C -0.164042 1.673529 0.000011  
H 2.495392 2.321979 0.000080  
H 4.360605 0.697955 -0.000026  
C -1.435994 1.162469 0.000008  
H -0.007688 2.747595 -0.000001  
H 1.545550 -2.564829 -0.000069  
C -1.591531 -0.255059 0.000074  
H -2.291138 1.823352 -0.000085

N -0.587104 -1.093137 0.000067  
O -2.810281 -0.853964 0.000213  
C -3.985281 -0.051308 -0.000193  
H -4.045086 0.576279 -0.895556  
H -4.817478 -0.752958 -0.000309  
H -4.045514 0.576568 0.894933

**1h**

E= -861.657735421 H= -861.523572 G= -861.565780

C 2.907314 -1.209737 -0.000059  
C 1.575914 -1.555870 -0.000092  
C 0.579538 -0.550328 -0.000021  
C 0.972769 0.822148 0.000059  
C 2.352114 1.145635 0.000089  
C 3.299968 0.149020 0.000035  
H 3.666320 -1.983815 -0.000104  
C -0.059842 1.794957 0.000113  
H 2.648830 2.189324 0.000160  
H 4.353981 0.401747 0.000059  
C -1.371738 1.401015 0.000071  
H 0.196486 2.849306 0.000188  
H 1.253827 -2.590046 -0.000163  
C -1.632533 0.006727 -0.000044  
H -2.188395 2.109693 0.000119  
N -0.735206 -0.925947 -0.000076  
Cl -3.325036 -0.500940 -0.000037

**1i**

E= -441.359521397 H= -441.187804 G= -441.230922

C 2.921964 0.386690 0.000039  
C 1.861596 1.262056 0.000030  
C 0.530354 0.775619 0.000160  
C 0.304347 -0.633962 -0.000016  
C 1.418599 -1.511256 -0.000025  
C 2.699448 -1.010963 0.000037  
H 3.937973 0.765199 0.000169  
C -1.040352 -1.082831 -0.000128  
H 1.245100 -2.582629 -0.000219  
H 3.546537 -1.687664 -0.000044  
C -2.074198 -0.177959 -0.000131  
H -1.241329 -2.150555 -0.000055  
H 2.007245 2.335751 -0.000027  
C -1.724472 1.203705 -0.000271  
N -0.499173 1.672210 -0.000010  
H -2.521500 1.946288 0.000115  
C -3.524108 -0.587607 0.000227  
H -3.628452 -1.674317 -0.000061  
H -4.045132 -0.199387 0.881012  
H -4.045288 -0.199118 -0.880352

**1j**

E= -633.142939639 H= -632.915097 G= -632.965690

C 4.538145 -0.030396 0.017469  
C 3.625217 -1.033688 -0.206261  
C 2.235145 -0.761032 -0.158456  
C 1.795710 0.568811 0.122149  
C 2.763076 1.582153 0.350193  
C 4.104460 1.287956 0.298121  
H 5.600157 -0.245490 -0.019702  
C 0.401833 0.803448 0.169491  
H 2.427204 2.591346 0.565689  
H 4.838356 2.066667 0.472432  
C -0.485999 -0.228061 -0.053889  
H 0.040699 1.799282 0.406275  
H 3.934208 -2.049401 -0.422373  
C 0.072019 -1.512484 -0.331177



N 1.355337 -1.778883 -0.383732  
H -0.599105 -2.343175 -0.536369  
C -1.955101 -0.034952 -0.017346  
C -2.791957 -0.989527 0.580136  
C -2.544410 1.108304 -0.577720  
C -4.171300 -0.803387 0.620782  
H -2.358497 -1.871307 1.038299  
C -3.923331 1.294388 -0.536209  
H -1.918896 1.844628 -1.069982  
C -4.742834 0.339134 0.063416  
H -4.799459 -1.549071 1.095188  
H -4.359226 2.181727 -0.981677  
H -5.816839 0.482979 0.094150

**1k**

E= -739.178225219 H= -739.028522 G= -739.074310

C 3.904536 0.177950 0.000457  
C 2.943613 1.159755 0.000360  
C 1.568153 0.814270 -0.000045  
C 1.201806 -0.568469 -0.000271  
C 2.218663 -1.559069 -0.000226  
C 3.541596 -1.191688 0.000131  
H 4.954212 0.449104 0.000764  
C -0.175452 -0.877425 -0.000729  
H 1.934602 -2.606069 -0.000497  
H 4.316089 -1.949915 0.000163  
C -1.093413 0.146511 -0.001064  
H -0.495820 -1.914077 -0.001070  
H 3.200632 2.211980 0.000575  
C -0.629846 1.486749 -0.000687  
N 0.642087 1.813745 -0.000243  
H -1.345756 2.302072 -0.000935  
C -2.563123 -0.168421 -0.000038  
F -2.924915 -0.882124 1.095141  
F -3.329105 0.941529 -0.019256  
F -2.919066 -0.916104 -1.074178

**1l**

E= -649.416633495 H= -649.185182 G= -649.239770

C -4.221138 -0.159320 0.094140  
C -3.379664 0.892426 0.370497  
C -1.978738 0.750489 0.210532  
C -1.455588 -0.501317 -0.237226  
C -2.349637 -1.566440 -0.517885  
C -3.703980 -1.398325 -0.354357  
H -5.292012 -0.042522 0.216974  
C -0.050880 -0.611653 -0.374511  
H -1.948476 -2.514138 -0.862536  
H -4.383061 -2.215446 -0.569507  
C 0.749519 0.469999 -0.091608  
H 0.377209 -1.547990 -0.718846  
H -3.754772 1.850109 0.710753  
C 0.118837 1.680053 0.316924  
N -1.174576 1.820288 0.481155  
H 0.739085 2.550936 0.508584  
C 2.233397 0.496410 -0.335814  
O 2.710604 1.416966 -0.989295  
N 2.998174 -0.537612 0.142957  
C 4.415170 -0.562189 -0.205064  
H 5.027721 -0.124042 0.592205  
H 4.730589 -1.597826 -0.357997  
H 4.571576 0.009892 -1.116015  
C 2.610526 -1.435556 1.224635  
H 2.666774 -2.481334 0.903401  
H 3.288951 -1.304663 2.075578  
H 1.599448 -1.224901 1.561397

**1m**

E= -494.295920662 H= -494.152912 G= -494.196239

C 3.177861 0.259532 0.000132  
C 2.169417 1.193893 0.000156  
C 0.814396 0.781855 0.000076  
C 0.514687 -0.617111 -0.000020  
C 1.578415 -1.556909 -0.000041  
C 2.882284 -1.125486 0.000033  
H 4.212878 0.581935 0.000191  
C -0.844434 -0.996177 -0.000094  
H 1.345458 -2.616406 -0.000119  
H 3.692706 -1.845029 0.000017  
C -1.817726 -0.016641 -0.000066  
H -1.118211 -2.045303 -0.000174  
H 2.374782 2.257390 0.000231  
C -1.411783 1.352360 0.000042  
N -0.161113 1.736964 0.000108  
H -2.171550 2.128927 0.000061  
C -3.207177 -0.346040 -0.000142  
N -4.334845 -0.599417 -0.000202

**1n**

E= -516.591290921 H= -516.413442 G= -516.458300

C 3.012820 -0.590298 0.000089  
C 2.465865 0.671124 0.000107  
C 1.059557 0.850606 -0.000004  
C 0.224655 -0.307071 -0.000081  
C 0.811698 -1.595660 -0.000079  
C 2.180703 -1.732853 -0.000002  
H 4.090202 -0.713451 0.000152  
C -1.188144 -0.094656 -0.000166  
H 0.166419 -2.464605 -0.000145  
H 2.626023 -2.721270 -0.000009  
C -1.668672 1.198031 -0.000124  
H 3.083876 1.560945 0.000187  
C -0.737707 2.263445 -0.000009  
N 0.567417 2.125714 0.000041  
H -1.115674 3.283619 0.000020  
H -2.726372 1.421086 -0.000183  
O -1.953985 -1.210105 -0.000238  
C -3.371648 -1.065335 0.000308  
H -3.713830 -0.536500 -0.894699  
H -3.772410 -2.077214 0.000878  
H -3.713047 -0.535766 0.895175

**1o**

E= -516.586441849 H= -516.409112 G= -516.454339

C -1.636444 -0.254883 0.000027  
C -0.558692 -1.118731 0.000052  
C 0.760026 -0.620195 0.000104  
C 0.977225 0.795646 0.000005  
C -0.147361 1.652836 -0.000047  
C -1.427602 1.148927 -0.000050  
C 2.315134 1.257634 0.000020  
H 0.007623 2.726916 -0.000158  
H -2.267427 1.830280 -0.000188  
C 3.340787 0.346355 0.000051  
H -0.717218 -2.189406 -0.000058  
C 3.019553 -1.034436 -0.000127  
N 1.796050 -1.513008 -0.000032  
H 3.822293 -1.768704 0.000018  
H 4.378114 0.658869 0.000242  
H 2.512111 2.325186 0.000103  
O -2.873449 -0.829168 -0.000073  
C -4.026755 0.002302 0.000058

H -4.068748 0.632260 -0.894960  
H -4.878189 -0.676176 0.000295  
H -4.068555 0.632451 0.894959

**1p**

E= -516.583303209 H= -516.405761 G= -516.450648

N 0.435625 1.683847 0.000000  
C -0.462913 2.644674 0.000000  
C -1.859032 2.420202 0.000000  
C -2.314515 1.125761 0.000000  
C -1.786288 -1.307049 0.000000  
C -0.833221 -2.292256 0.000000  
C 0.546376 -1.978444 0.000000  
C 0.970330 -0.663404 0.000000  
C 0.000000 0.398640 0.000000  
C -1.386883 0.055283 0.000000  
H -0.080180 3.662721 0.000000  
H -2.542923 3.260900 0.000000  
H -3.377218 0.905664 0.000000  
H -2.842820 -1.550998 0.000000  
H -1.128738 -3.335494 0.000000  
H 1.264306 -2.787154 0.000000  
O 2.264647 -0.273842 0.000000  
C 3.274696 -1.272373 0.000000  
H 4.220638 -0.733693 0.000000  
H 3.214541 -1.902173 0.894448  
H 3.214541 -1.902173 -0.894448

**1q**

E= -501.295186166 H= -501.159806 G= -501.200707

N 1.002361 -1.425192 0.000000  
C 2.264808 -1.058888 -0.000002  
C 2.699413 0.288983 0.000001  
C 1.758204 1.286610 0.000000  
C -0.655853 1.915718 -0.000001  
C -1.970756 1.518178 -0.000002  
C -2.309870 0.145811 0.000001  
C -1.315744 -0.795553 0.000004  
C 0.061450 -0.445040 0.000000  
C 0.381761 0.948937 -0.000001  
H 2.998806 -1.860968 0.000004  
H 3.759474 0.512835 0.000003  
H 2.049161 2.331899 0.000000  
H -0.396271 2.968543 -0.000001  
H -2.764471 2.255831 -0.000004  
H -3.343712 -0.176556 0.000000  
F -1.644444 -2.098198 0.000000

**1r**

E= -708.633969212 H= -708.385750 G= -708.443686

N -1.581186 1.666497 0.000014  
C -0.263265 1.714428 0.000057  
C 0.532199 0.510475 0.000079  
C -0.116256 -0.707768 0.000053  
C -2.251812 -1.991198 -0.000043  
C -3.625677 -1.975398 -0.000104  
C -4.323601 -0.742896 -0.000128  
C -3.643560 0.452546 -0.000090  
C -2.226116 0.467542 -0.000026  
C -1.524245 -0.772681 -0.000003  
H 0.462552 -1.622838 0.000074  
H -1.707892 -2.930191 -0.000025  
H -4.181892 -2.905770 -0.000135  
H -5.407995 -0.746778 -0.000177  
H -4.161417 1.404077 -0.000105  
C 0.336479 3.096168 0.000108

H 0.974334 3.254393 0.872300  
H 0.974209 3.254497 -0.872158  
H -0.477572 3.819718 0.000206  
C 2.024119 0.556686 0.000098  
O 2.698021 1.562188 -0.000391  
O 2.570772 -0.681826 0.000174  
C 4.018104 -0.744994 -0.000116  
C 4.413219 -2.207545 0.000311  
H 4.390482 -0.219134 0.881915  
H 4.390096 -0.219760 -0.882686  
H 5.503284 -2.292320 0.000081  
H 4.031335 -2.717913 0.887471  
H 4.030913 -2.718550 -0.886302

**1s**

E= -900.986263116 H= -900.822923 G= -900.868605

N -0.338734 -1.195018 0.000017  
C -1.358977 -0.399517 -0.000016  
C -1.316524 1.029383 -0.000023  
C -0.054809 1.576899 -0.000071  
C 2.425274 1.278694 -0.000131  
C 3.503842 0.425079 -0.000126  
C 3.307728 -0.975930 -0.000071  
C 2.038442 -1.506164 -0.000018  
C 0.911934 -0.648820 -0.000019  
C 1.105208 0.763090 -0.000080  
H 0.058847 2.656797 -0.000095  
H 2.572037 2.353723 -0.000170  
H 4.511701 0.824000 -0.000163  
H 4.168701 -1.634684 -0.000068  
H 1.865210 -2.575382 0.000023  
Cl -2.951020 -1.178853 0.000200  
C -2.559280 1.874865 0.000027  
H -3.177983 1.670515 -0.877876  
H -3.177936 1.670489 0.877957  
H -2.299130 2.934695 0.000035

**1t**

E= -555.911655517 H= -555.705051 G= -555.754294

N -0.488408 -1.438337 0.000000  
C -1.801396 -1.462867 0.000000  
C -2.637133 -0.312628 0.000000  
C -2.008648 0.910101 0.000000  
C 0.099744 2.234617 0.000000  
C 1.471108 2.242951 0.000000  
C 2.212926 1.038755 0.000000  
C 1.568477 -0.183956 0.000000  
C 0.131942 -0.231166 0.000000  
C -0.594250 0.996470 0.000000  
H -2.261355 -2.450341 0.000000  
H -2.589798 1.827985 0.000000  
H -0.464370 3.160750 0.000000  
H 2.009235 3.184370 0.000000  
H 3.292959 1.091616 0.000000  
O 2.194371 -1.382714 0.000000  
C 3.614452 -1.407734 0.000000  
H 3.890159 -2.460889 0.000000  
H 4.023341 -0.924558 -0.894298  
H 4.023341 -0.924558 0.894298  
C -4.135818 -0.465203 0.000000  
H -4.477234 -1.018496 -0.880730  
H -4.477234 -1.018490 0.880734  
H -4.633588 0.506640 -0.000003

**1u**

E= -746.510183201 H= -746.270632 G= -746.325189

N -1.849888 2.089395 -0.000007  
 C -0.538619 2.015508 -0.000005  
 C 0.158870 0.783604 0.000000  
 C -0.590315 -0.384510 0.000004  
 C -2.822209 -1.529302 0.000008  
 C -4.190949 -1.389050 0.000006  
 C -4.778773 -0.103402 0.000001  
 C -3.994636 1.027901 -0.000004  
 C -2.581982 0.929848 -0.000004  
 C -1.997677 -0.379655 0.000004  
 H 0.004897 2.957217 -0.000010  
 H -2.361695 -2.509968 0.000013  
 H -4.824987 -2.268249 0.000009  
 H -5.858995 -0.011169 -0.000001  
 H -4.428577 2.020451 -0.000008  
 C 1.546005 0.363000 0.000001  
 C 1.501183 -1.038954 0.000007  
 C 2.635589 -1.832378 -0.000012  
 C 3.860075 -1.169826 -0.000031  
 C 3.956464 0.236962 -0.000025  
 C 2.790849 1.002338 -0.000017  
 H 2.569474 -2.913071 -0.000026  
 H 4.772322 -1.757175 -0.000056  
 H 2.852994 2.085031 -0.000032  
 O 0.197115 -1.498909 0.000008  
 C 5.316363 0.895524 0.000045  
 H 5.897124 0.607222 0.881610  
 H 5.897897 0.605842 -0.880548  
 H 5.230413 1.983735 -0.000831

**1v**

E= -596.222024588 H= -595.976419 G= -596.023277

N 0.251753 -1.383768 -0.143397  
 C -0.833708 -0.667466 -0.236847  
 C -0.893287 0.764162 -0.228610  
 C 0.265221 1.473177 -0.119463  
 C 2.751478 1.379485 0.060184  
 C 3.909522 0.639246 0.141796  
 C 3.852575 -0.771708 0.128212  
 C 2.641310 -1.419774 0.033432  
 C 1.433735 -0.686901 -0.049620  
 C 1.489334 0.744144 -0.035914  
 H 0.284624 2.559257 -0.102275  
 H 2.791614 2.464249 0.069123  
 H 4.869079 1.138278 0.217120  
 H 4.770256 -1.345605 0.193134  
 H 2.575312 -2.501307 0.020361  
 C -2.264094 -1.154997 -0.332513  
 C -2.359501 1.125643 -0.317835  
 C -2.869138 -0.033869 -1.218902  
 H -3.959956 -0.078093 -1.280118  
 H -2.449572 -0.009194 -2.227102  
 C -2.932111 -0.830374 1.041469  
 H -3.929809 -1.274163 1.083810  
 H -2.355972 -1.231665 1.876696  
 C -3.006053 0.731437 1.048549  
 H -4.041727 1.078945 1.086114  
 H -2.476397 1.175587 1.892945  
 H -2.374515 -2.185427 -0.664601  
 H -2.576880 2.142286 -0.645058

**1w**

E= -532.640943632 H= -532.475337 G= -532.520181

N 0.153712 1.895136 0.000038  
 C -1.124377 1.648617 0.000039  
 C -1.632323 0.305577 0.000115

C 1.391474 -1.597496 0.000065  
 C 2.749857 -1.364859 0.000071  
 C 3.258570 -0.046871 0.000064  
 C 2.398662 1.028942 0.000057  
 C 1.002013 0.817719 0.000051  
 C 0.488934 -0.510808 0.000050  
 H -1.821966 2.481091 -0.000029  
 H 0.985920 -2.602294 0.000076  
 H 3.438766 -2.202130 0.000079  
 H 4.330418 0.113815 0.000068  
 H 2.759185 2.050797 0.000052  
 N -0.861219 -0.743060 0.000094  
 O -2.972830 0.194003 -0.000016  
 C -3.523324 -1.131611 -0.000425  
 H -3.206520 -1.680190 0.888465  
 H -4.602370 -0.992669 -0.001234  
 H -3.205151 -1.680235 -0.888787

**1x**

E= -439.164526796 H= -439.023361 G= -439.064268

C 0.189731 0.735972 -0.000007  
 C 0.187063 -0.661888 0.000002  
 C 1.334832 -1.435026 0.000014  
 C 2.539364 -0.729892 0.000022  
 C 2.569527 0.674392 0.000014  
 C 1.399079 1.429783 -0.000001  
 H 1.299914 -2.516907 0.000020  
 H 3.473037 -1.279930 0.000034  
 H 3.528505 1.179205 0.000020  
 H 1.418428 2.512553 -0.000008  
 N -1.134584 1.182949 -0.000023  
 O -1.124397 -1.070072 -0.000008  
 C -1.845150 0.105797 -0.000016  
 C -3.322986 -0.024869 -0.000004  
 H -3.661181 -0.574046 0.882846  
 H -3.769031 0.967855 -0.000202  
 H -3.661166 -0.574403 -0.882635

**1y**

E= -762.141629920 H= -762.003119 G= -762.045901

C -0.349241 0.757835 -0.000017  
 C -0.422487 -0.653211 -0.000004  
 C -1.648091 -1.319103 0.000015  
 C -2.808980 -0.553298 0.000012  
 C -2.749766 0.848895 0.000004  
 C -1.529366 1.510248 -0.000009  
 H -1.698739 -2.401213 0.000017  
 H -3.772747 -1.049287 0.000017  
 H -3.670151 1.421210 0.000007  
 H -1.468645 2.591820 -0.000012  
 N 0.934165 1.285129 -0.000008  
 C 1.832341 0.360501 -0.000005  
 C 3.306748 0.608776 0.000078  
 H 3.780825 0.171317 -0.882962  
 H 3.481315 1.684418 0.000060  
 H 3.780727 0.171363 0.883195  
 S 1.202582 -1.309337 -0.000044

**1z**

E= -837.359750466 H= -837.215554 G= -837.260962

C -0.080147 -0.248907 -0.033695  
 C 1.070190 0.580143 0.024706  
 C 1.003007 1.970607 0.051219  
 C -0.263716 2.543335 0.019601  
 C -1.416448 1.758151 -0.030797  
 C -1.355993 0.363529 -0.056372

H 1.895747 2.581046 0.091992  
H -0.362650 3.622652 0.038345  
H -2.397145 2.217132 -0.051371  
N 0.185365 -1.611293 -0.081061  
C 1.451910 -1.840322 -0.056548  
S 2.502798 -0.431140 0.027584  
H 1.885825 -2.831730 -0.083402  
O -2.553010 -0.269150 -0.131840  
C -2.691593 -1.664968 0.160937  
H -3.766834 -1.838919 0.184515  
H -2.223264 -2.282027 -0.605032  
H -2.253186 -1.907074 1.131448

**1aa**

E= -419.259094586 H= -419.105093 G= -419.146967

C -0.156283 -0.672381 -0.000096  
C -0.217851 0.761393 -0.000082  
C -1.470067 1.422859 0.000033  
C -2.608150 0.652956 0.000216  
C -2.543357 -0.771823 0.000216  
C -1.344510 -1.442536 0.000037  
H -1.529359 2.505424 0.000011  
H -3.580898 1.131266 0.000348  
H -3.470496 -1.334002 0.000361  
H -1.293999 -2.524648 0.000016  
N 1.119026 -1.109705 -0.000398  
C 3.301380 -0.090876 0.000747  
H 3.628705 -0.625058 0.893635  
H 3.628596 -0.639171 -0.883479  
H 3.731852 0.909461 -0.007194  
C 1.122051 1.156473 -0.000403  
H 1.589054 2.127902 -0.000560  
N 1.852013 0.017196 -0.000623

**1ab**

E= -722.799897991 H= -722.690803 G= -722.729065

C -0.128130 0.871607 0.000013  
C 0.028110 -0.537463 -0.000004  
C -2.192059 -0.935828 0.000260  
C -2.482108 0.437216 0.000312  
C -1.443174 1.355860 0.000178  
H -2.996557 -1.664799 0.000366  
H -3.514511 0.765111 0.000452  
H -1.639735 2.422626 0.000210  
C 2.189424 0.701024 -0.000371  
S 1.731735 -0.986721 -0.000160  
H 3.238500 0.957360 -0.000573  
N -0.953775 -1.430643 0.000109  
C 1.134971 1.555716 -0.000139  
H 1.238758 2.632950 -0.000157

**1ac**

E= -1182.51831128 H= -1182.171553 G= -1182.241753

N 2.396868 -0.985429 -0.136297  
C 6.566790 -0.739291 -0.159226  
O -1.491182 3.347091 0.279009  
N -0.030052 1.596466 0.123866  
C 5.904917 -1.985949 -0.265646  
H 6.489710 -2.894281 -0.355478  
C 4.532760 -2.051963 -0.256675  
H 4.006262 -2.995147 -0.337985  
O -4.631784 0.759668 -0.772249  
C 3.755275 -0.870930 -0.140468  
O -5.011727 -1.219488 -1.689625  
C 4.426059 0.394938 -0.032482  
O -2.862978 -2.389732 -0.676869  
H -3.567312 -2.615370 -1.305198

C 5.843564 0.423888 -0.045315  
H 6.348895 1.380614 0.036408  
C -3.828224 -1.452309 1.346465  
H -4.168200 -0.516570 1.800877  
H -4.715704 -2.075702 1.199161  
C -3.776999 1.599914 0.049032  
H -4.220495 1.649075 1.049190  
H -3.839101 2.594005 -0.390300  
C -4.371009 -0.542197 -0.923111  
C -3.247965 -1.170582 -0.073723  
C -1.317592 2.134003 0.169180  
C -2.357343 1.127452 0.073792  
C -2.070438 -0.211361 -0.027381  
C -0.732866 -0.678105 -0.085359  
H -0.500785 -1.724937 -0.206111  
C 0.259501 0.256394 -0.004012  
C 1.169786 2.447457 0.190490  
H 1.173397 3.011070 1.127733  
H 1.154354 3.173073 -0.627699  
C 1.719567 0.131568 -0.027953  
C 2.277822 1.436609 0.086012  
C 3.637920 1.571072 0.083607  
C -2.844562 -2.161345 2.278616  
H -1.978205 -1.535646 2.506461  
H -2.488178 -3.090468 1.830835  
H -3.336835 -2.405145 3.223478  
H 4.123986 2.538233 0.166771  
H 7.650079 -0.705956 -0.168297

# NMR SPECTRA

8.339  
8.326  
8.313  
7.929  
7.927  
7.916  
7.914  
7.887  
7.885  
7.874  
7.872  
7.785  
7.775  
7.771  
7.762  
7.758  
7.687  
7.459  
7.446  
7.395  
7.381  
7.366  
7.274  
7.260

2.141  
2.137  
1.964  
1.948  
1.944  
1.940  
1.936  
1.932

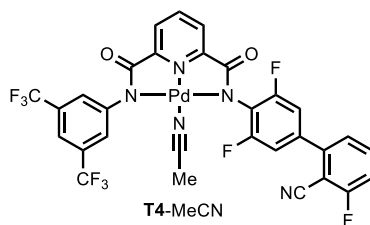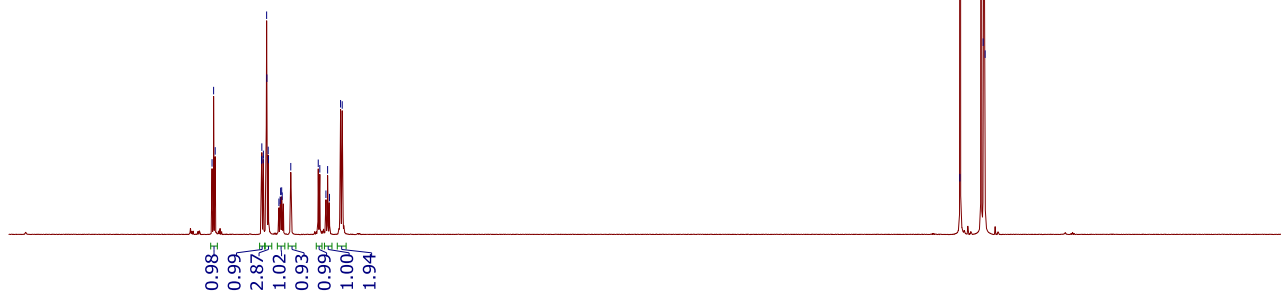

0.0 9.5 9.0 8.5 8.0 7.5 7.0 6.5 6.0 5.5 5.0 4.5 4.0 3.5 3.0 2.5 2.0 1.5 1.0 0.5 0.0 -0.1

170.08  
169.56  
165.71  
164.02  
159.55  
159.51  
157.91  
157.87  
152.92  
151.08  
149.65  
145.52  
143.81  
136.39  
136.32  
132.05  
131.84  
131.62  
131.40  
127.85  
127.78  
127.75  
127.43  
126.96  
126.94  
125.55  
125.50  
125.39  
123.75  
118.31  
116.69  
116.56  
114.51  
113.35  
113.31  
113.21  
113.18  
101.40  
101.29  
1.79  
1.75  
1.71  
1.65  
1.62  
1.55  
1.48  
1.41  
1.40  
1.34  
1.27  
1.20  
1.14  
1.07  
0.93

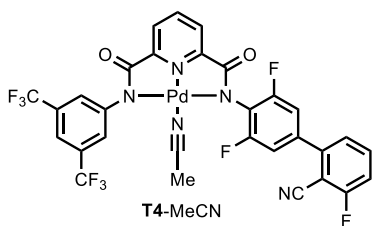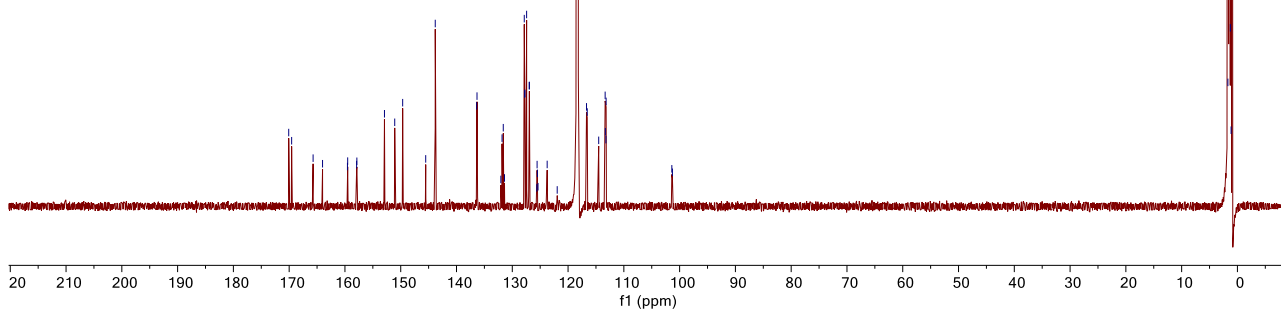

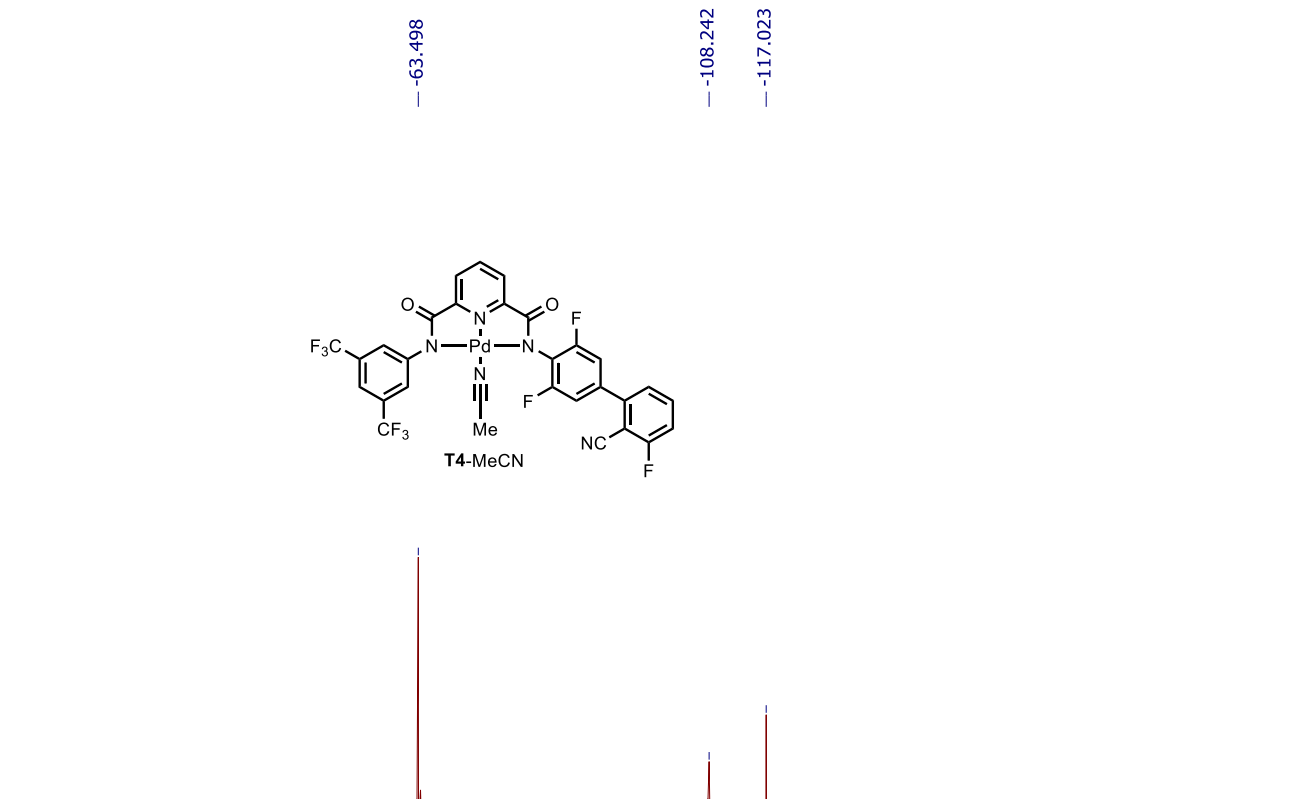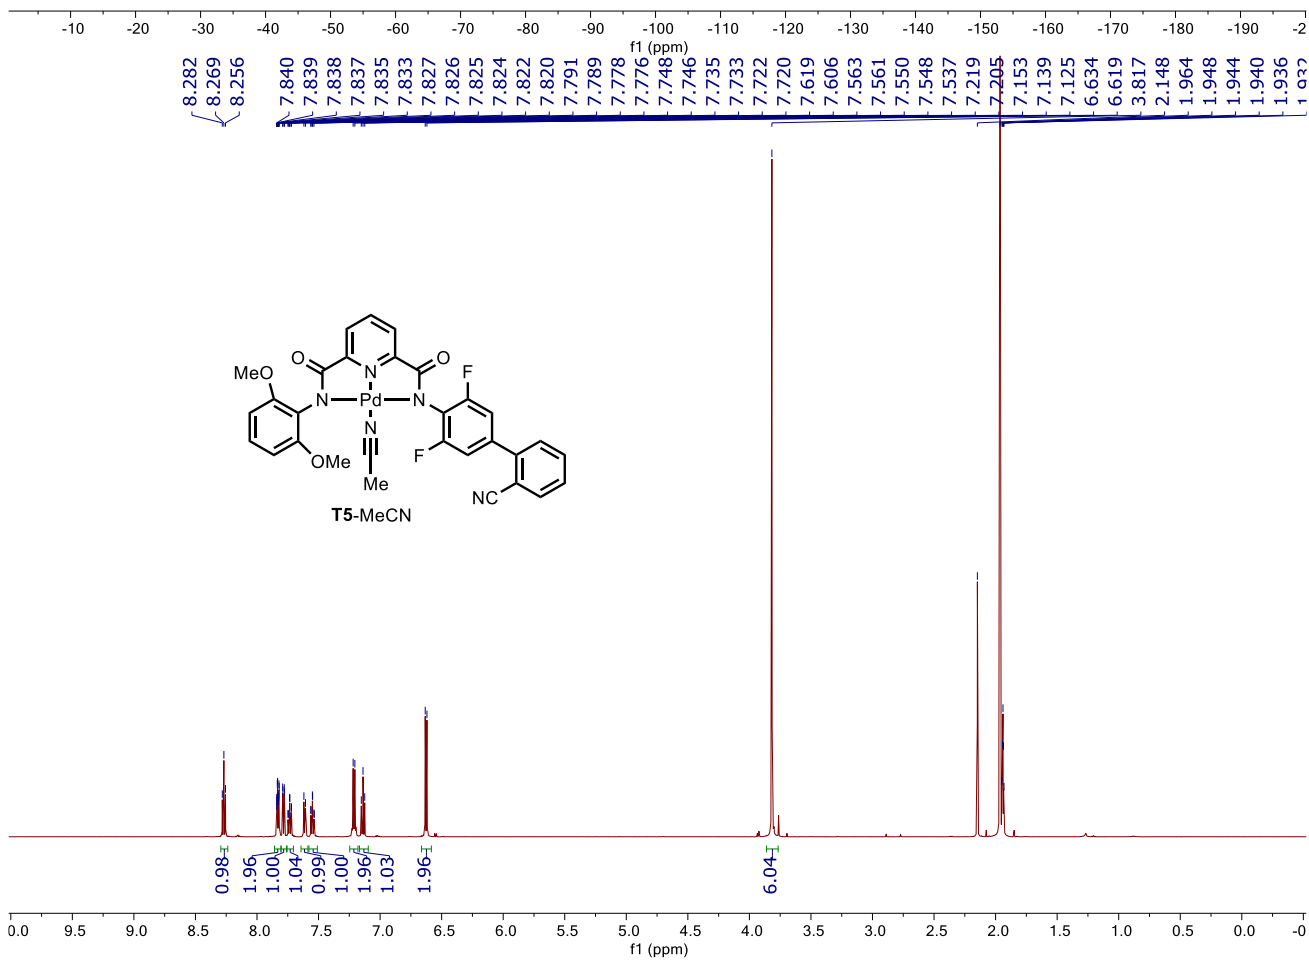

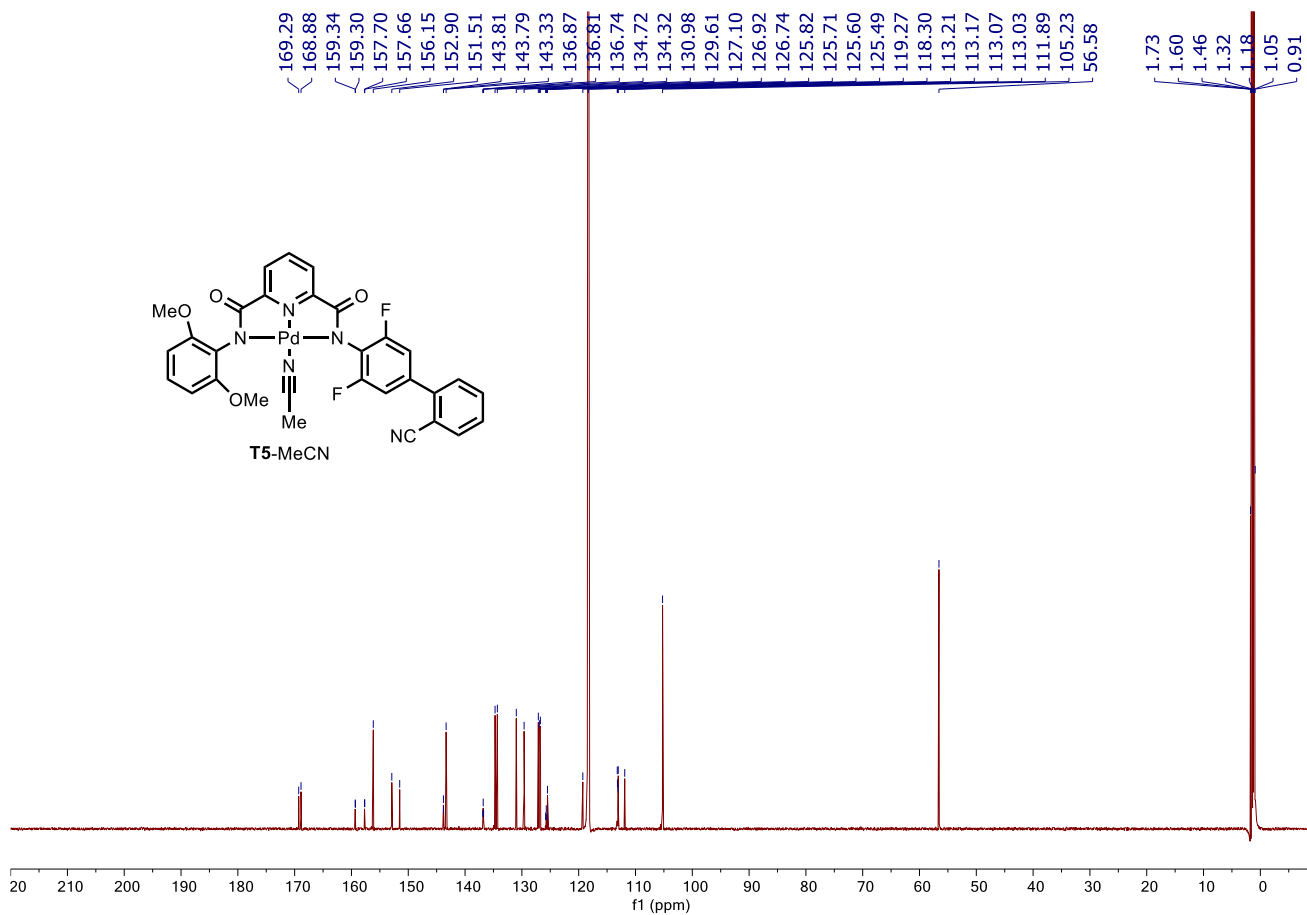

--117.569

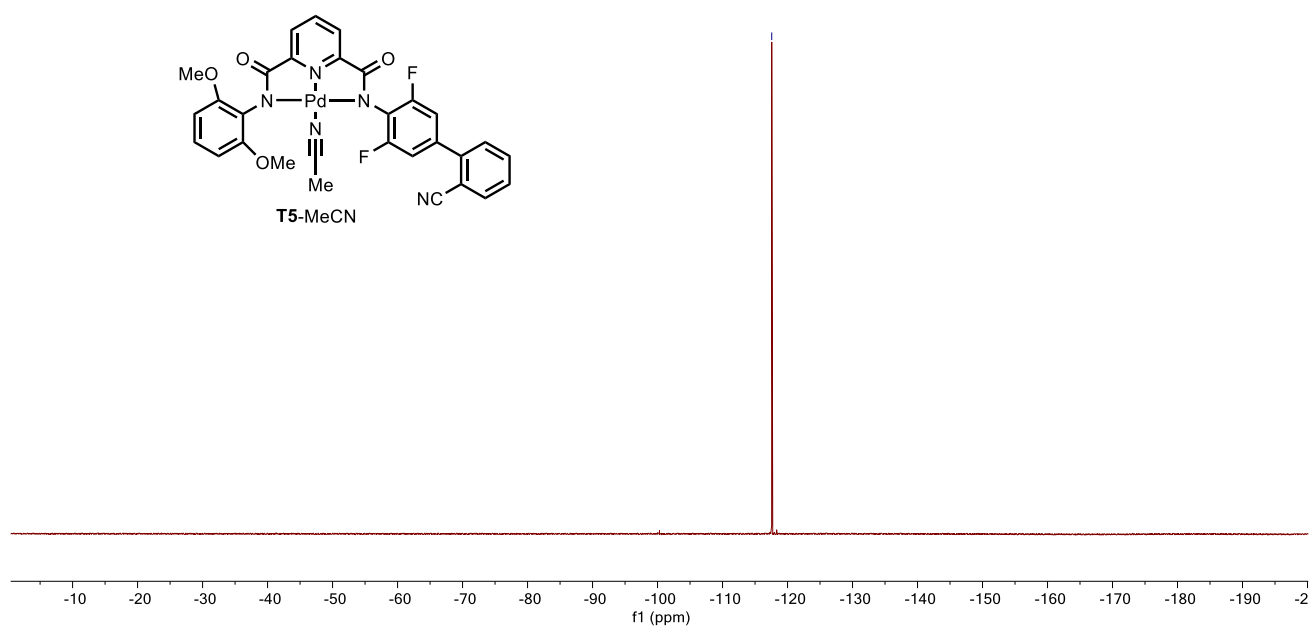

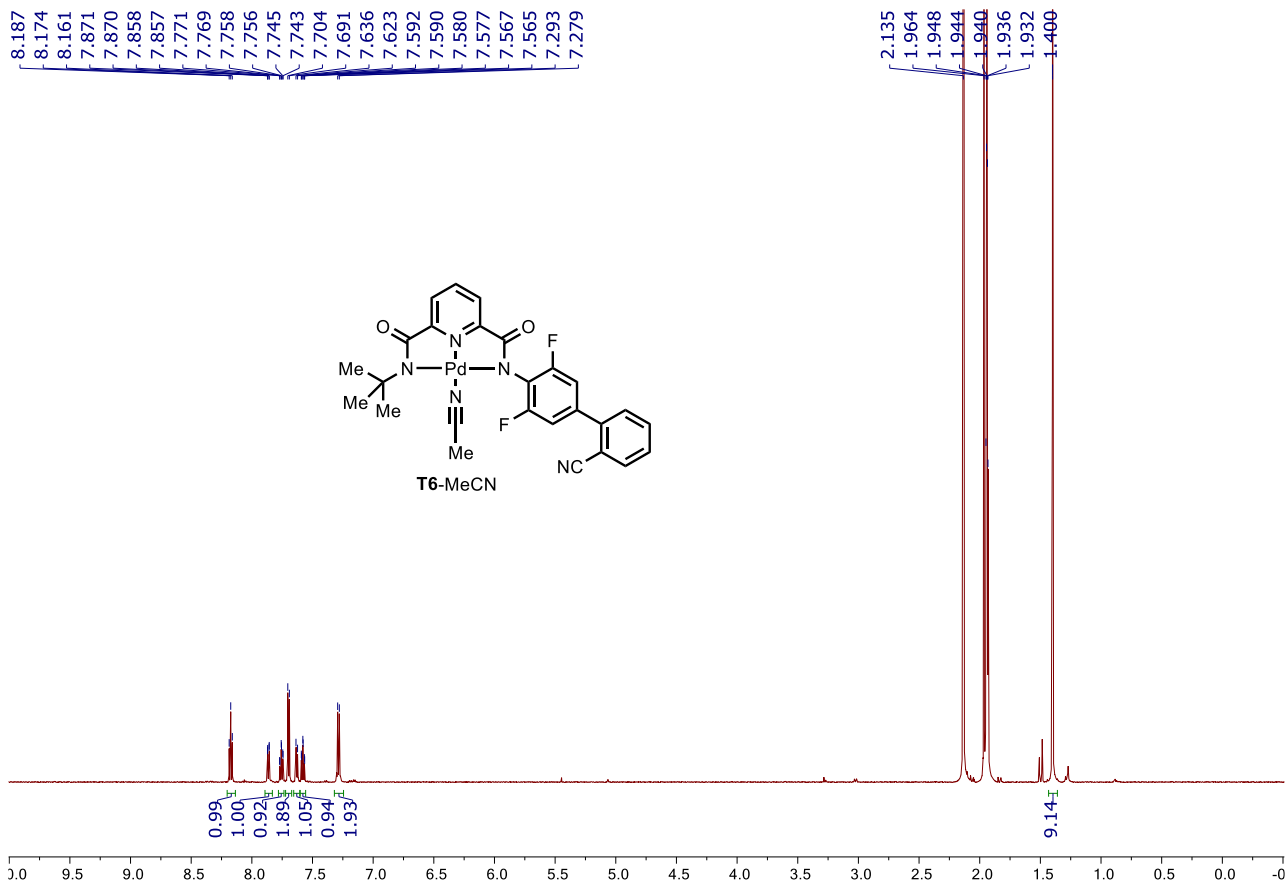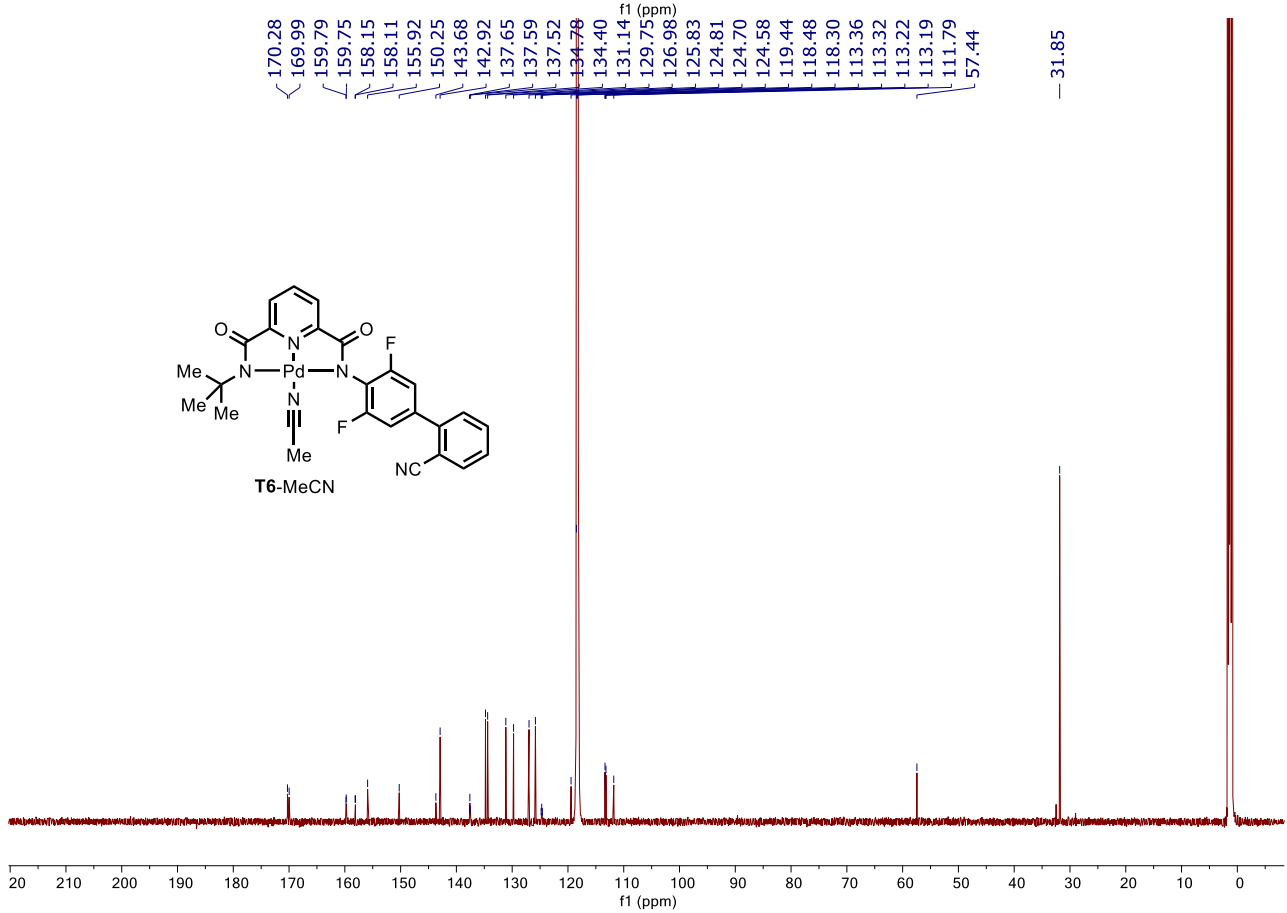



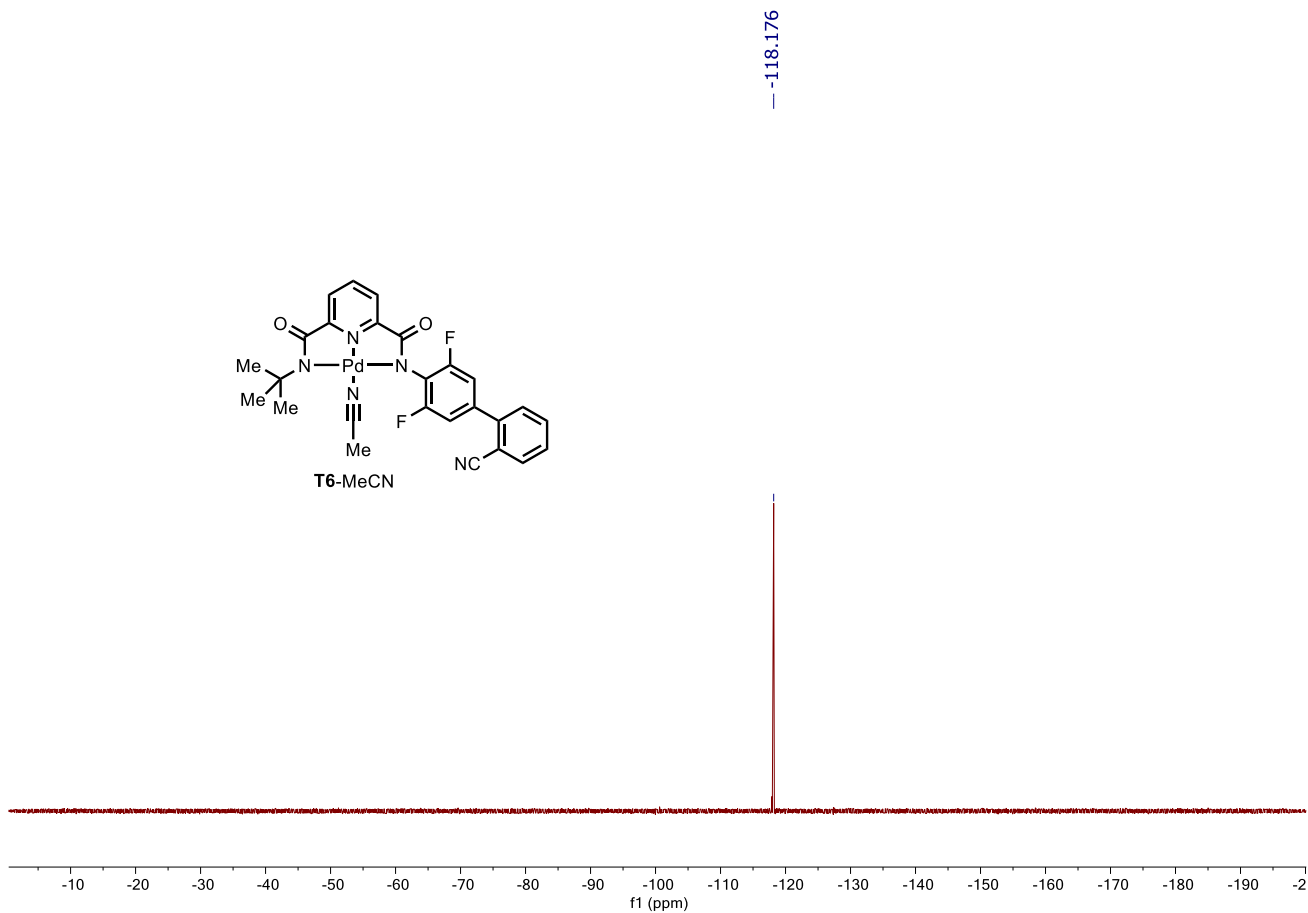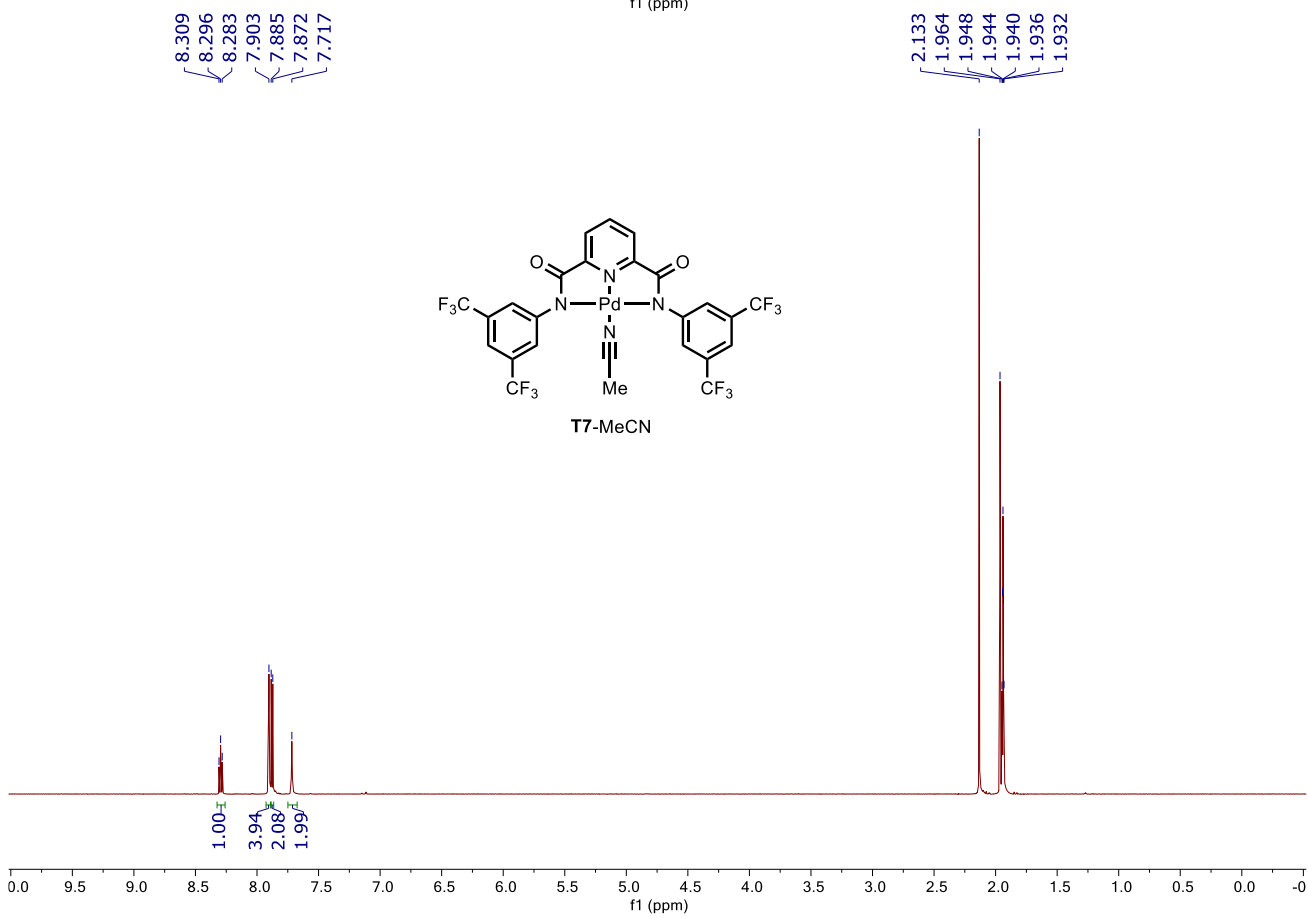

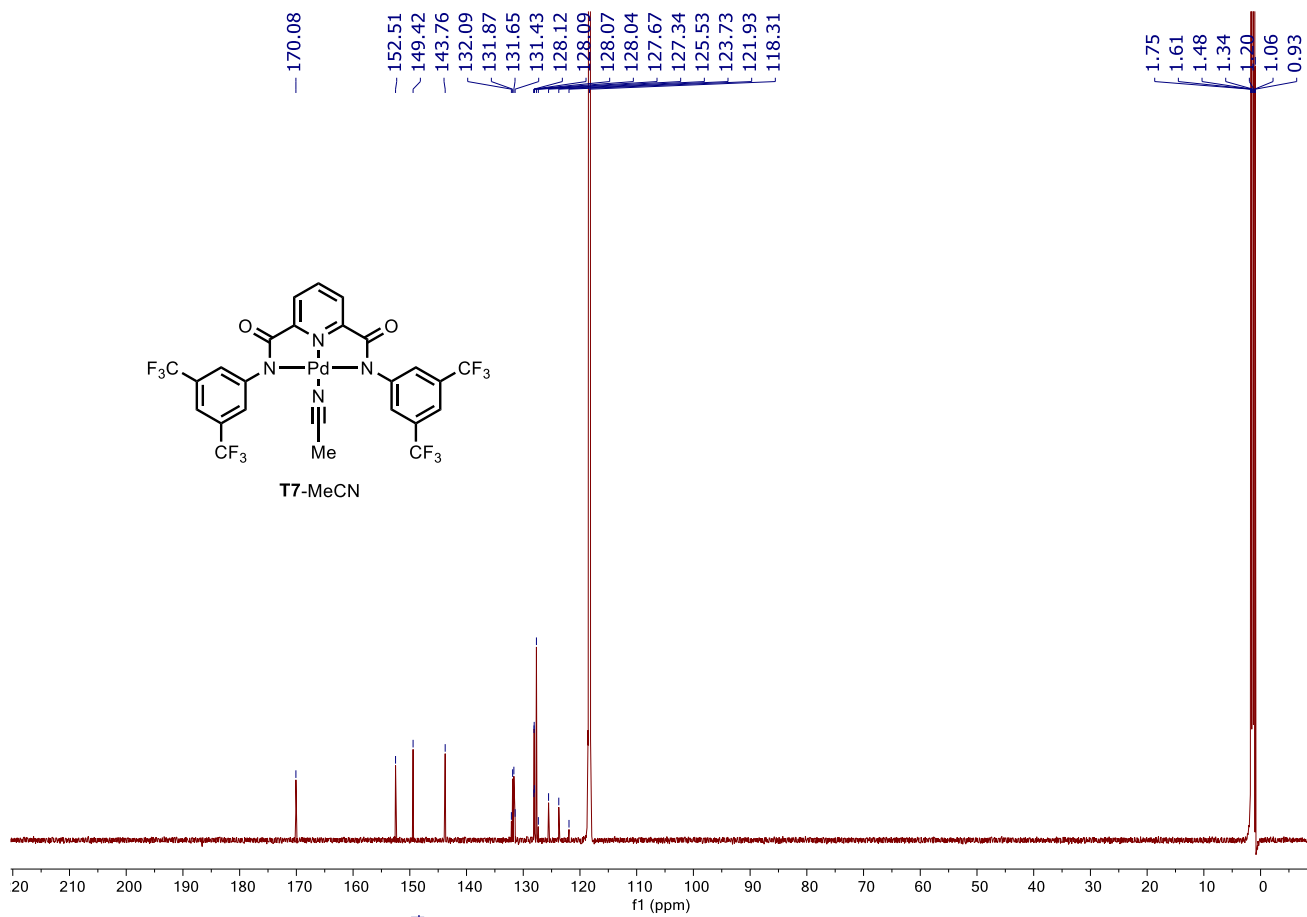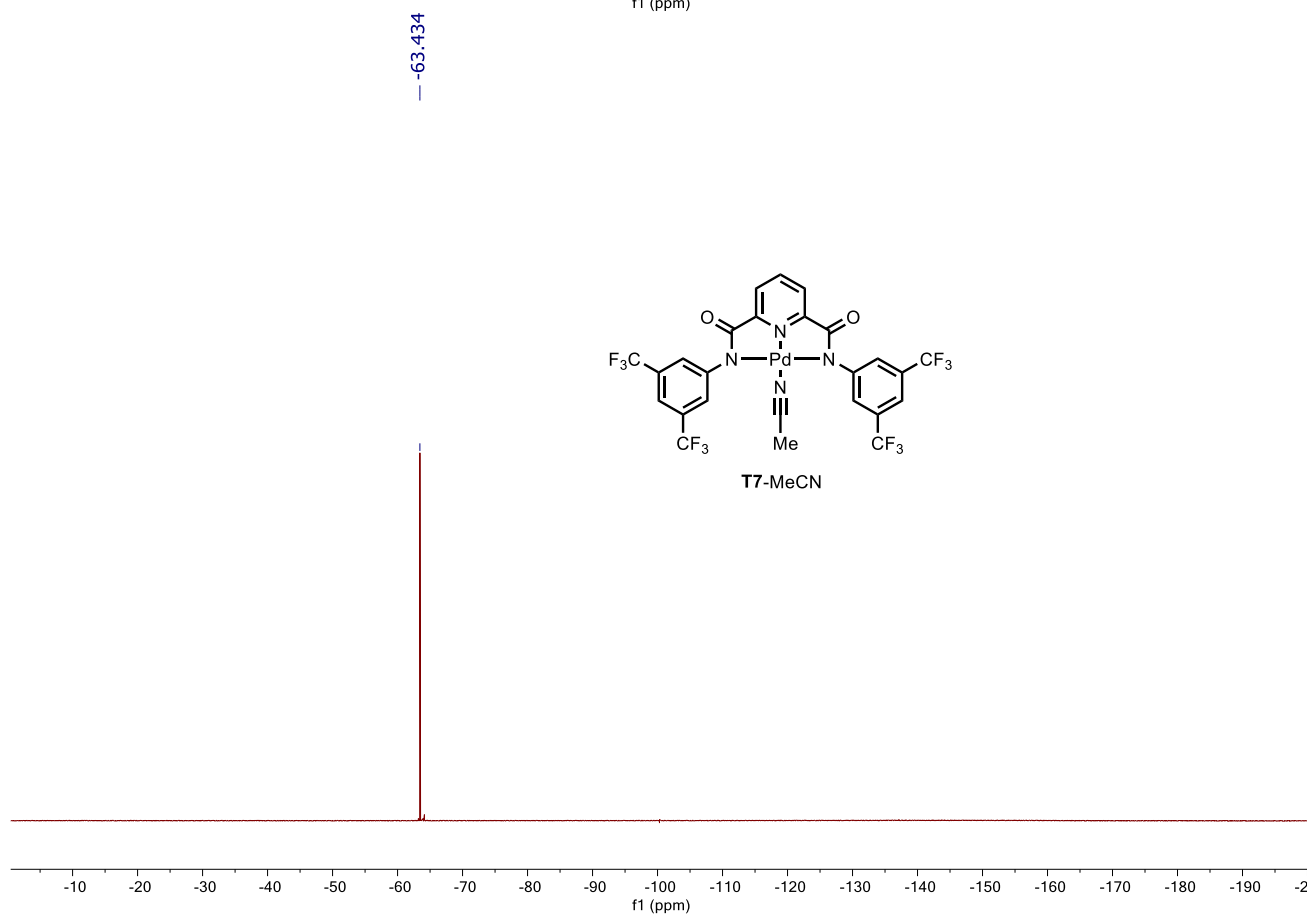

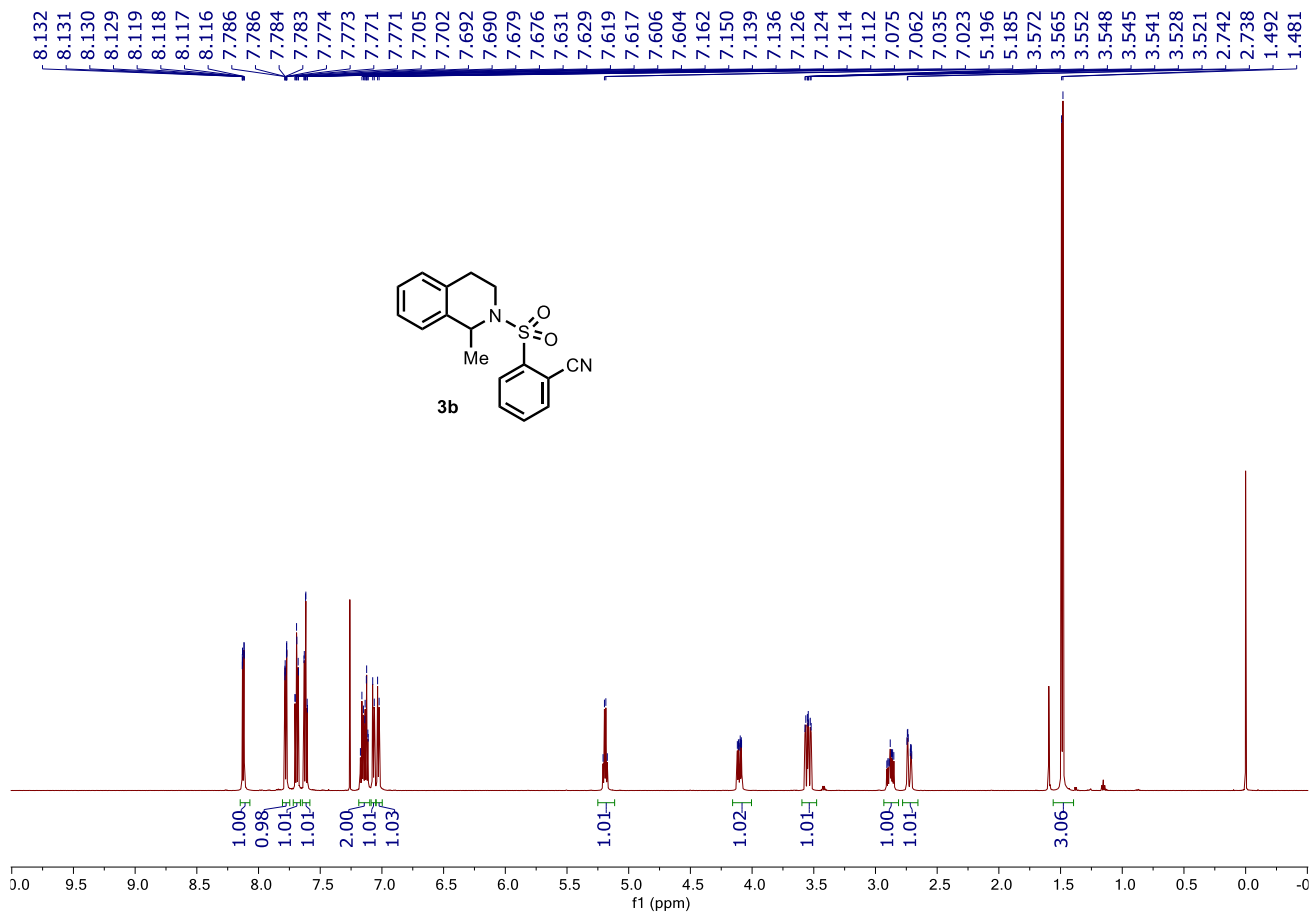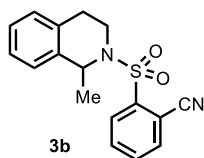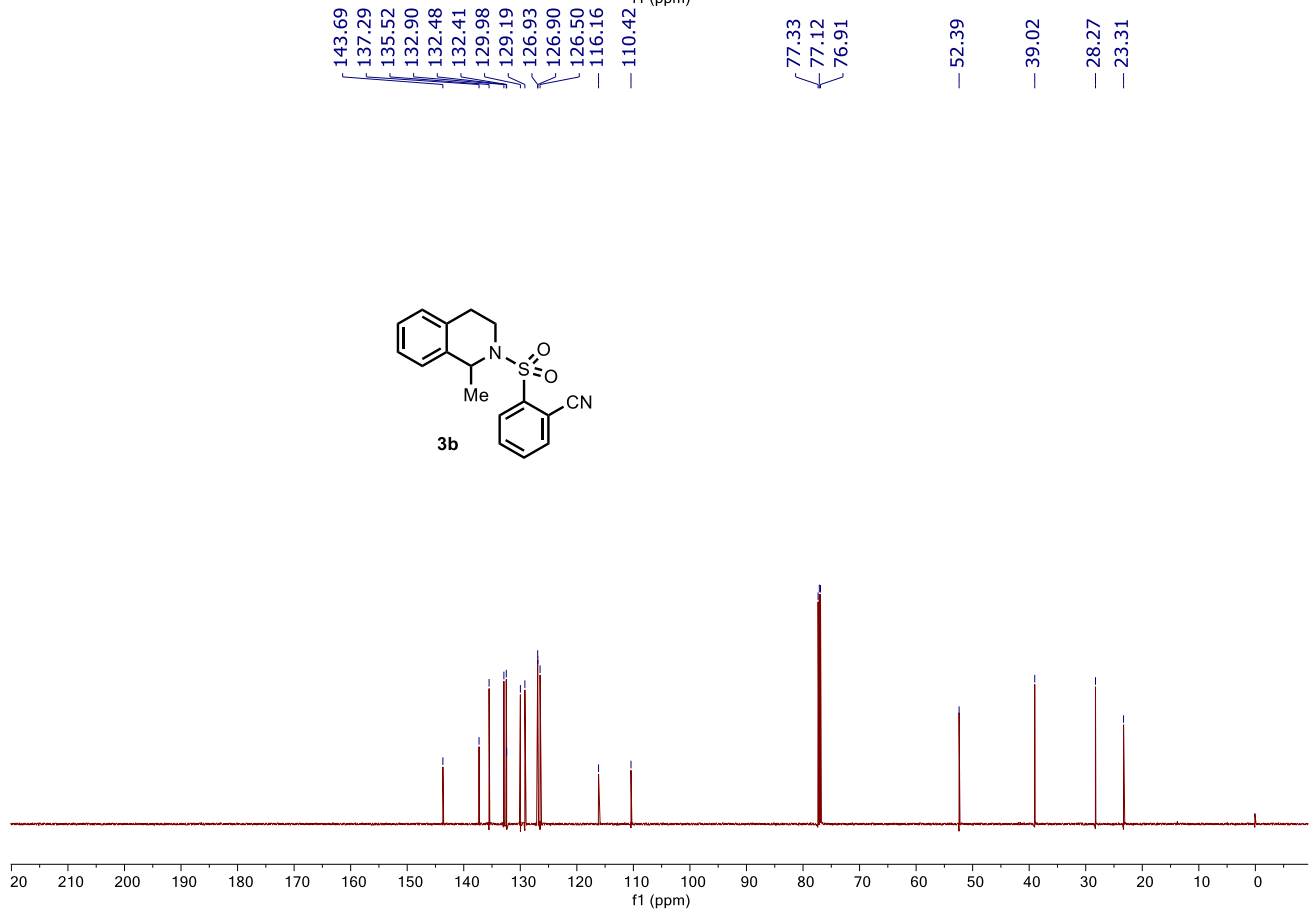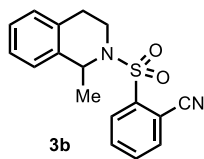

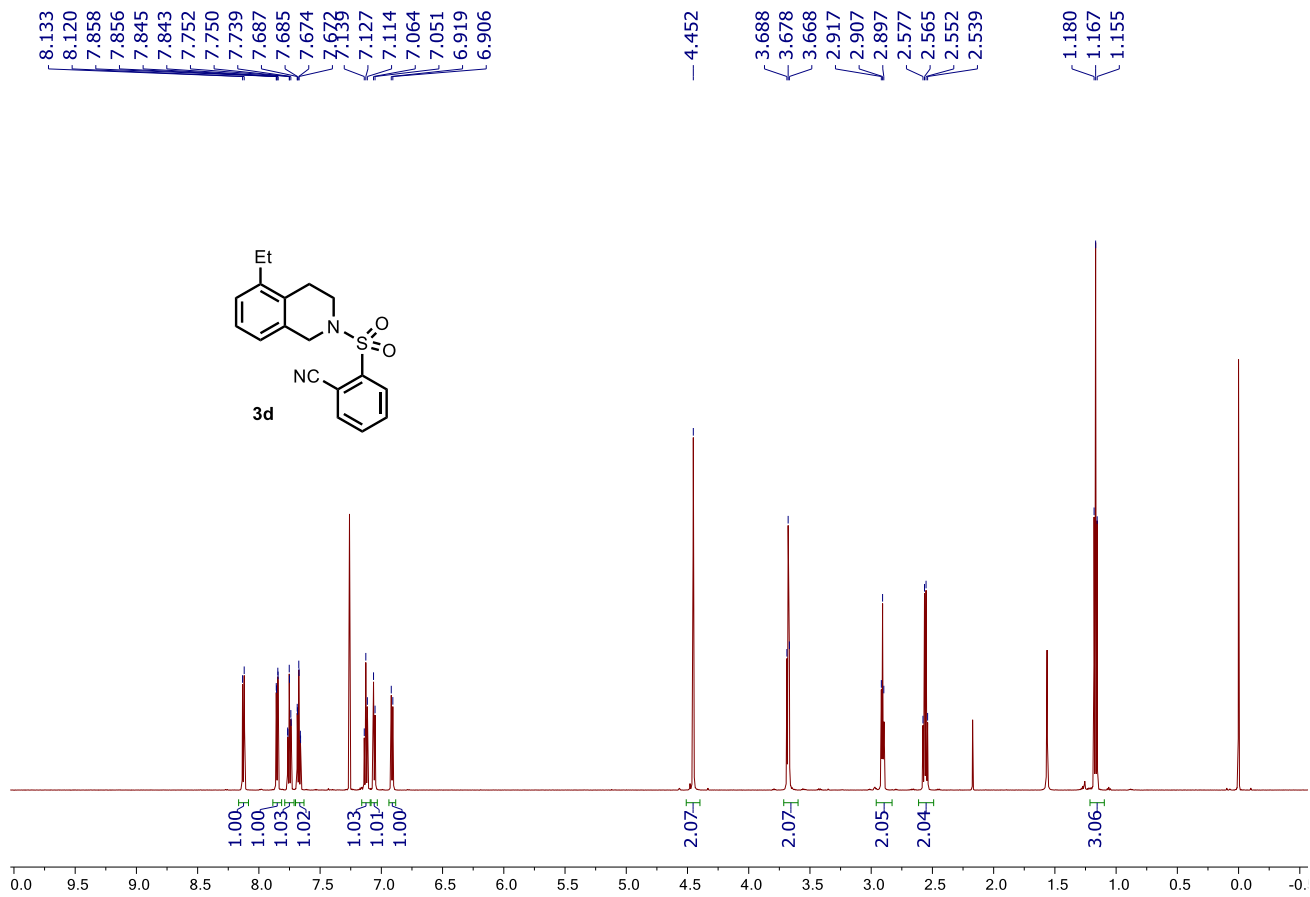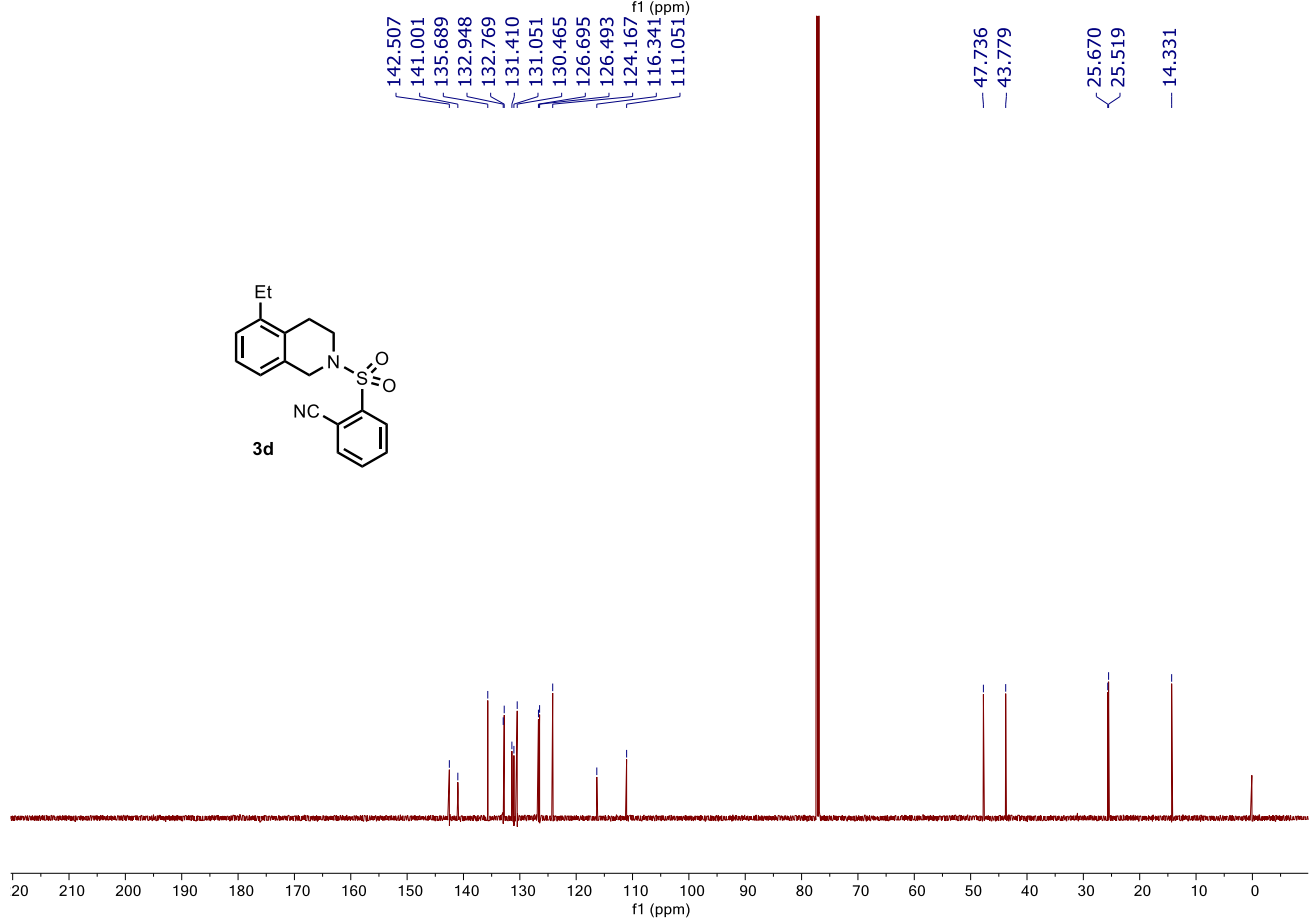

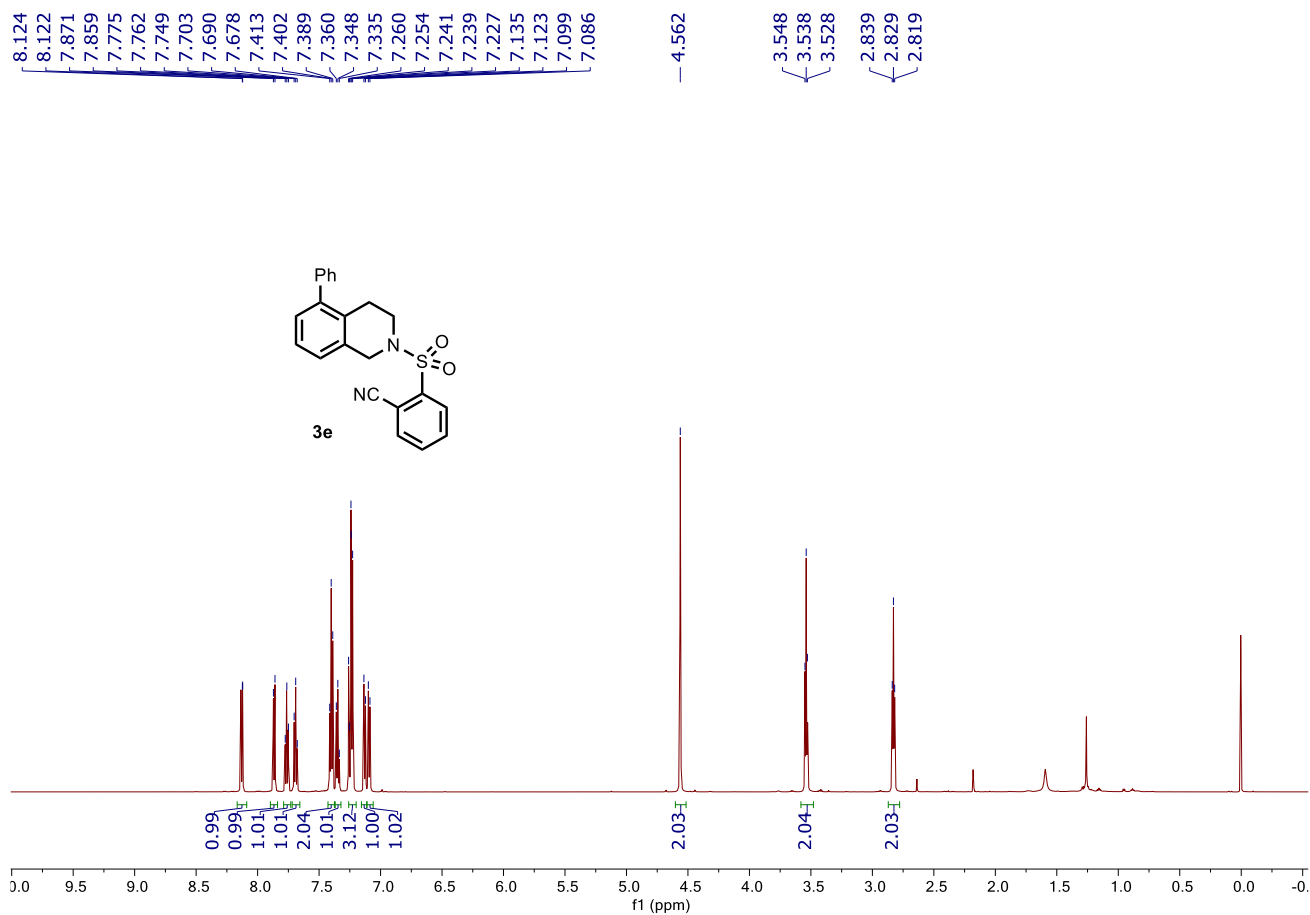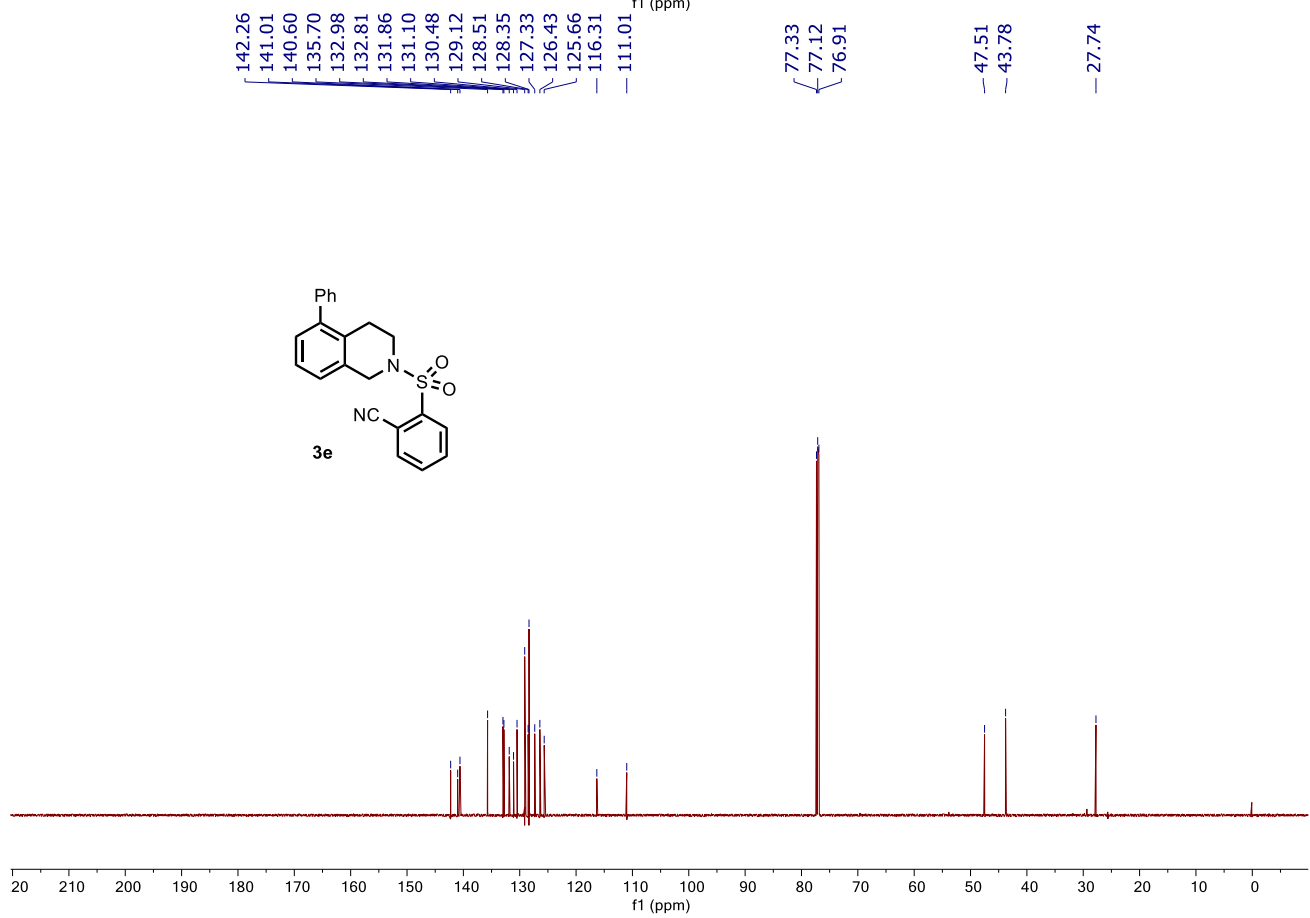

8.134  
8.132  
8.121  
8.118  
7.858  
7.856  
7.845  
7.843  
7.776  
7.774  
7.763  
7.761  
7.750  
7.748  
7.702  
7.700  
7.690  
7.688  
7.677  
7.675  
7.436  
7.431  
7.425  
7.420  
7.260  
7.054  
7.046  
7.043  
-4.498

3.652  
3.642  
3.632  
2.937  
2.927  
2.917

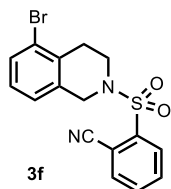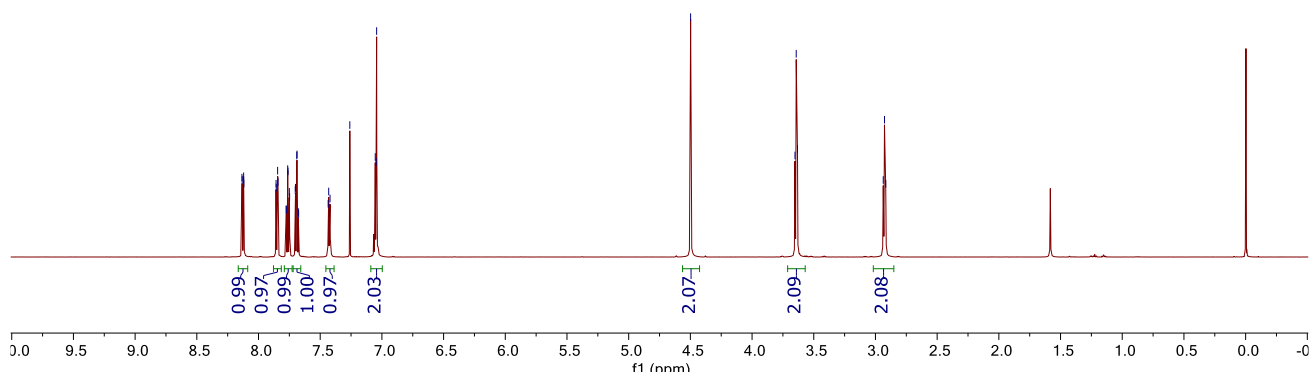

141.02  
135.69  
133.97  
133.04  
132.95  
132.93  
131.19  
130.40  
127.79  
125.62  
125.40  
116.21  
110.93

77.33  
77.12  
76.91

47.45  
43.65

29.51

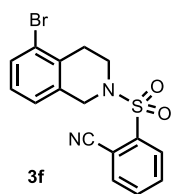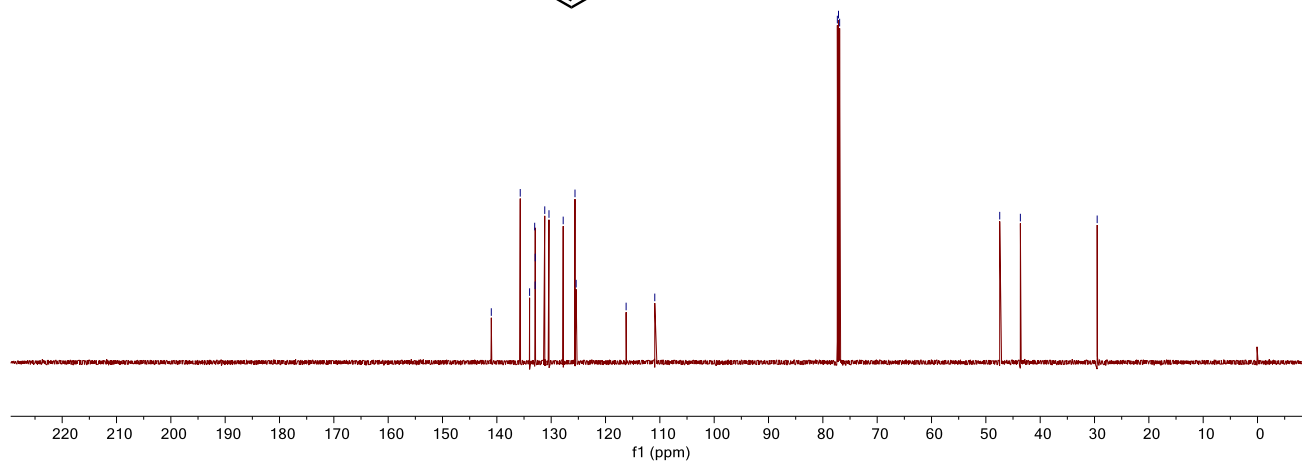

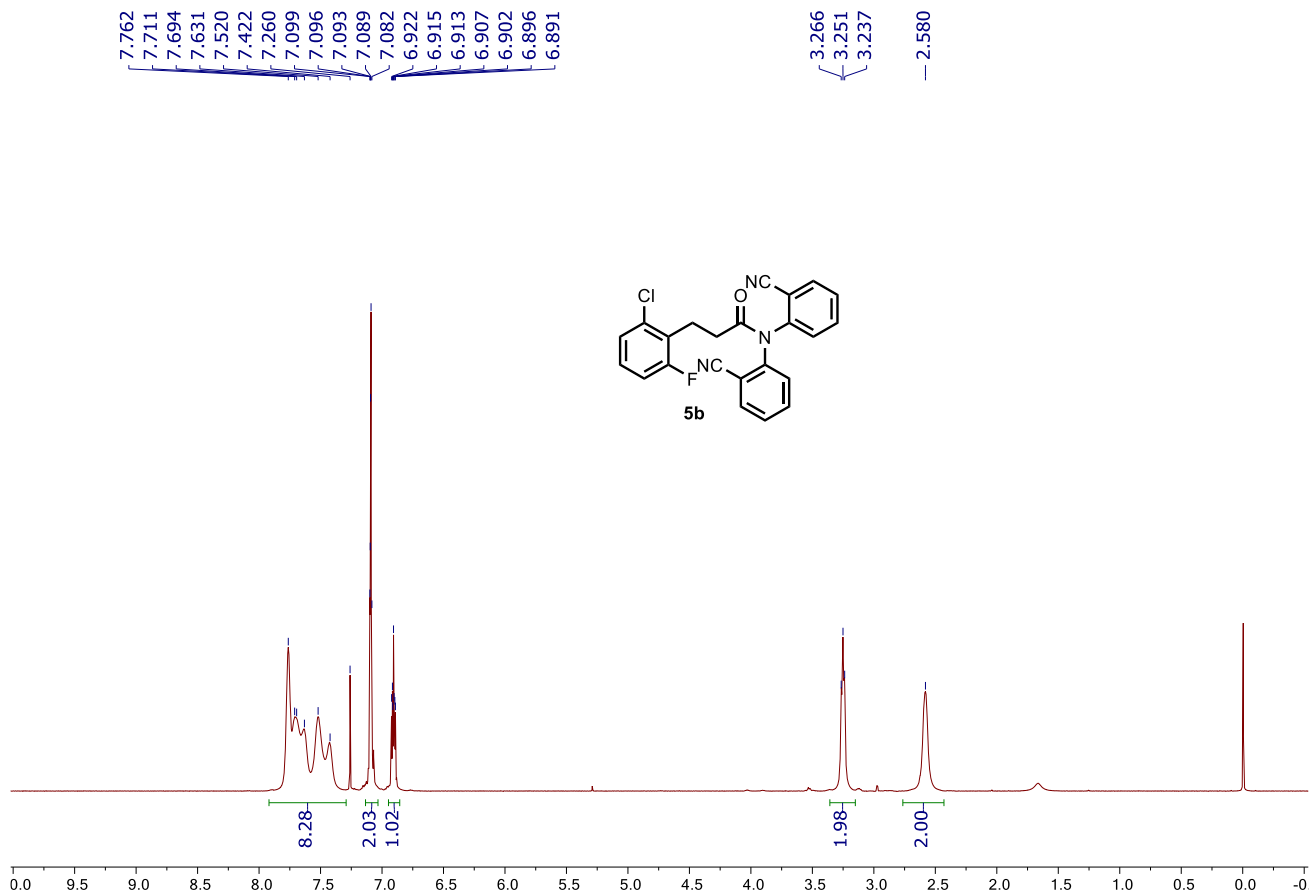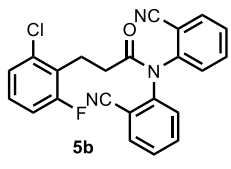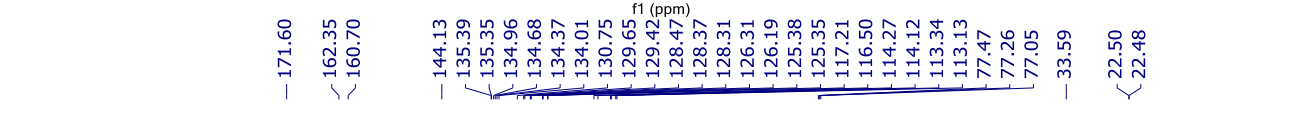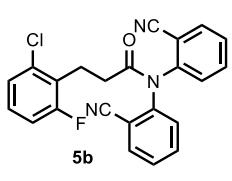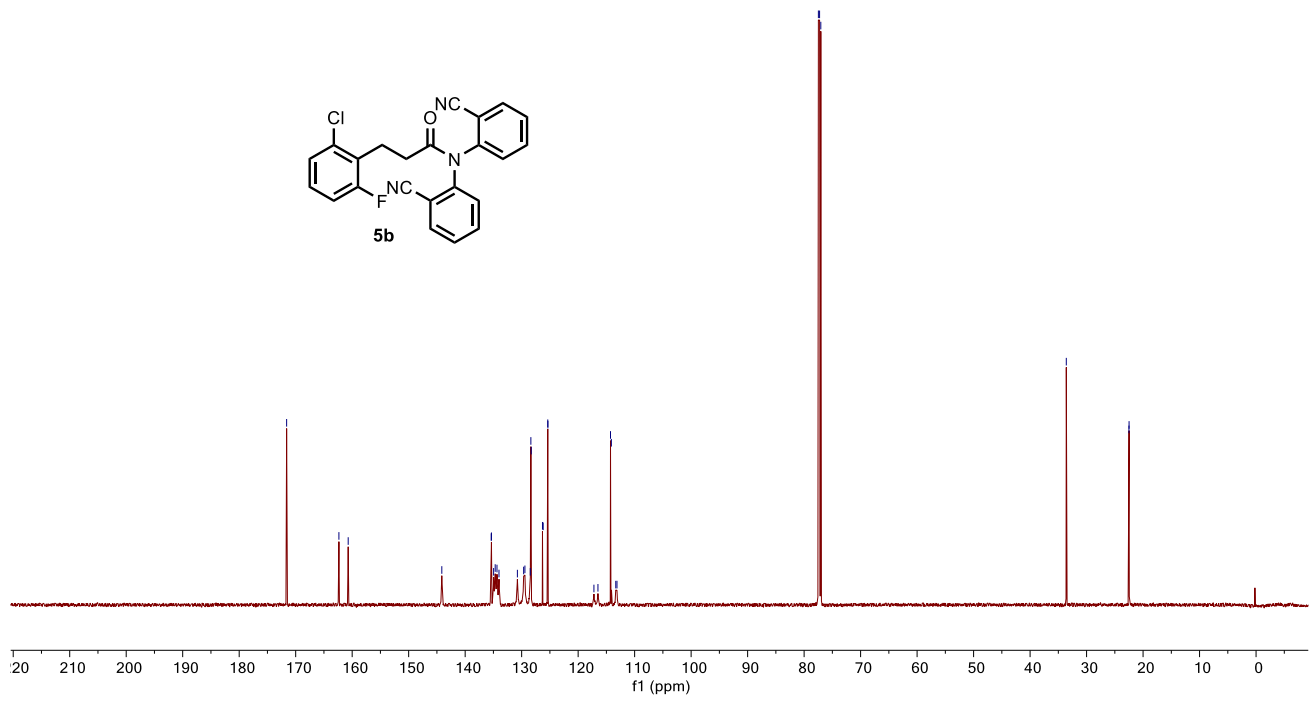

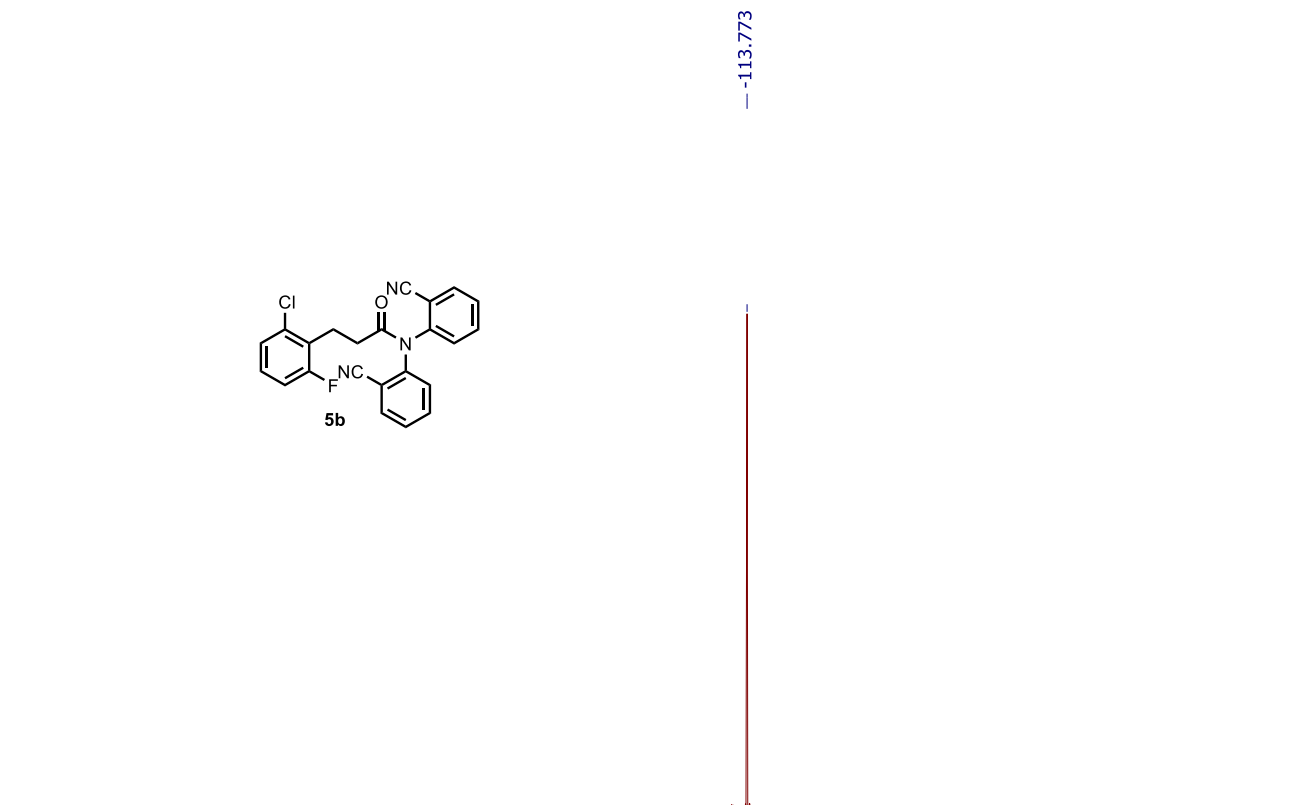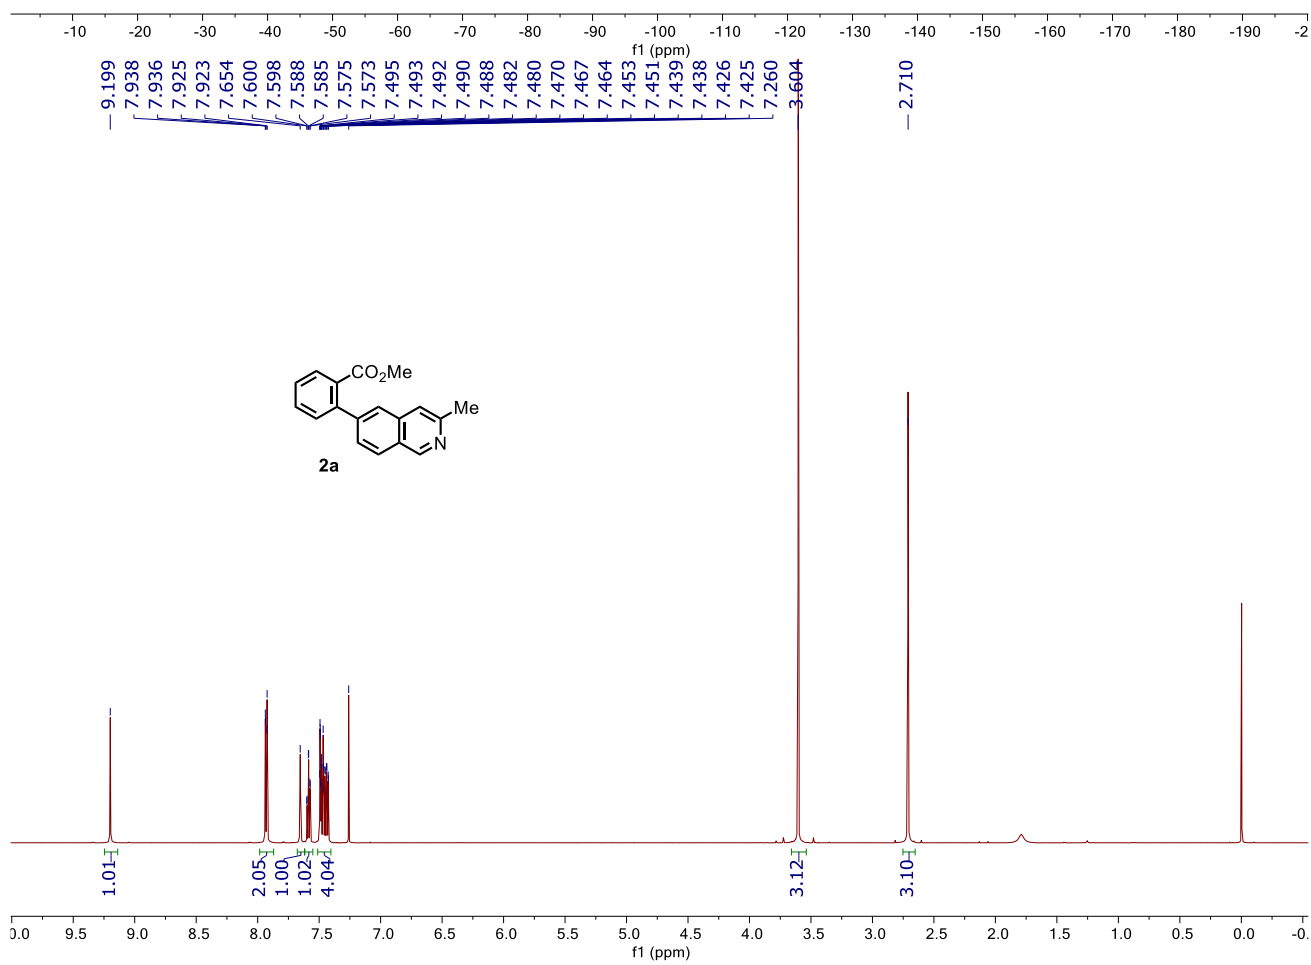



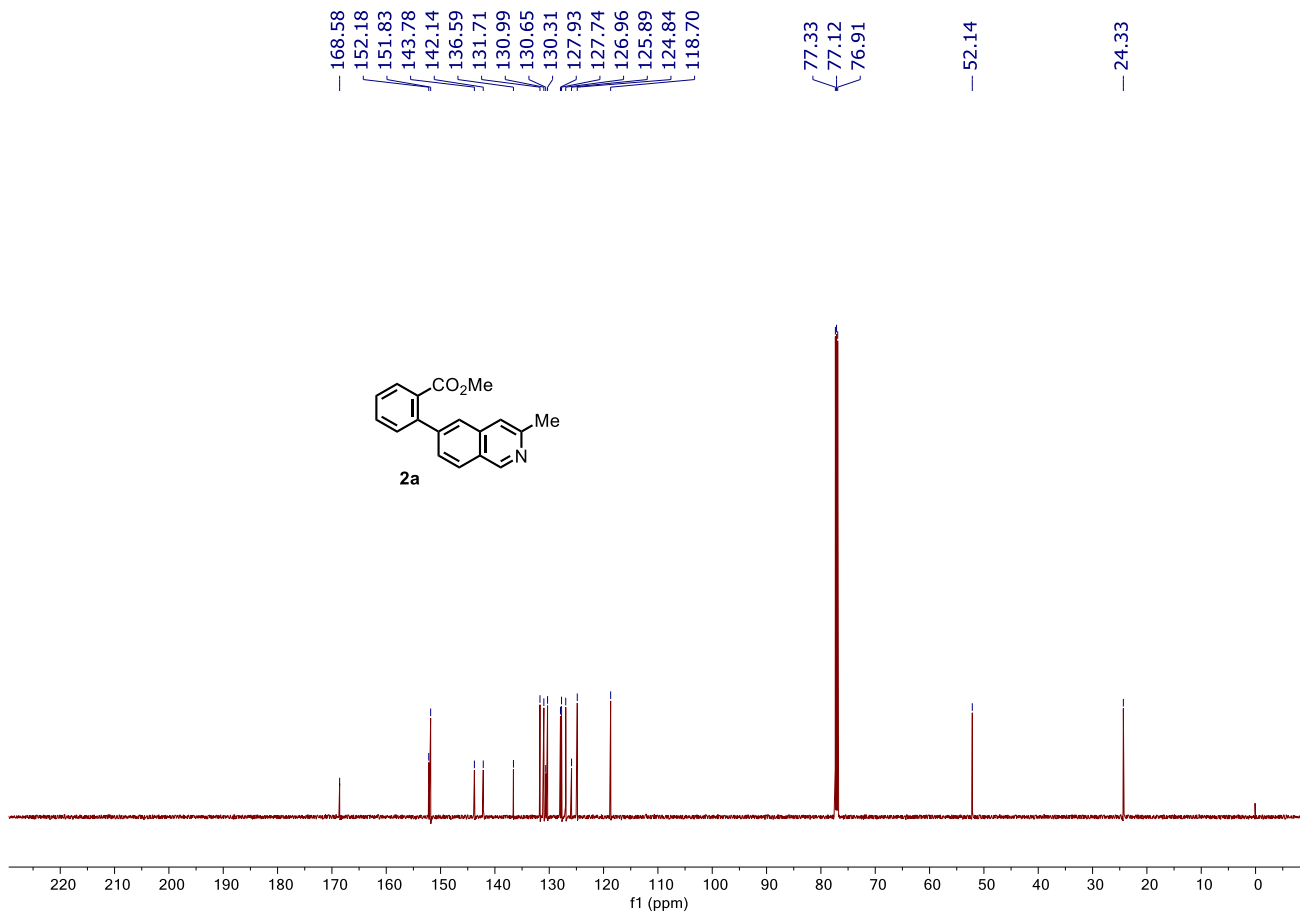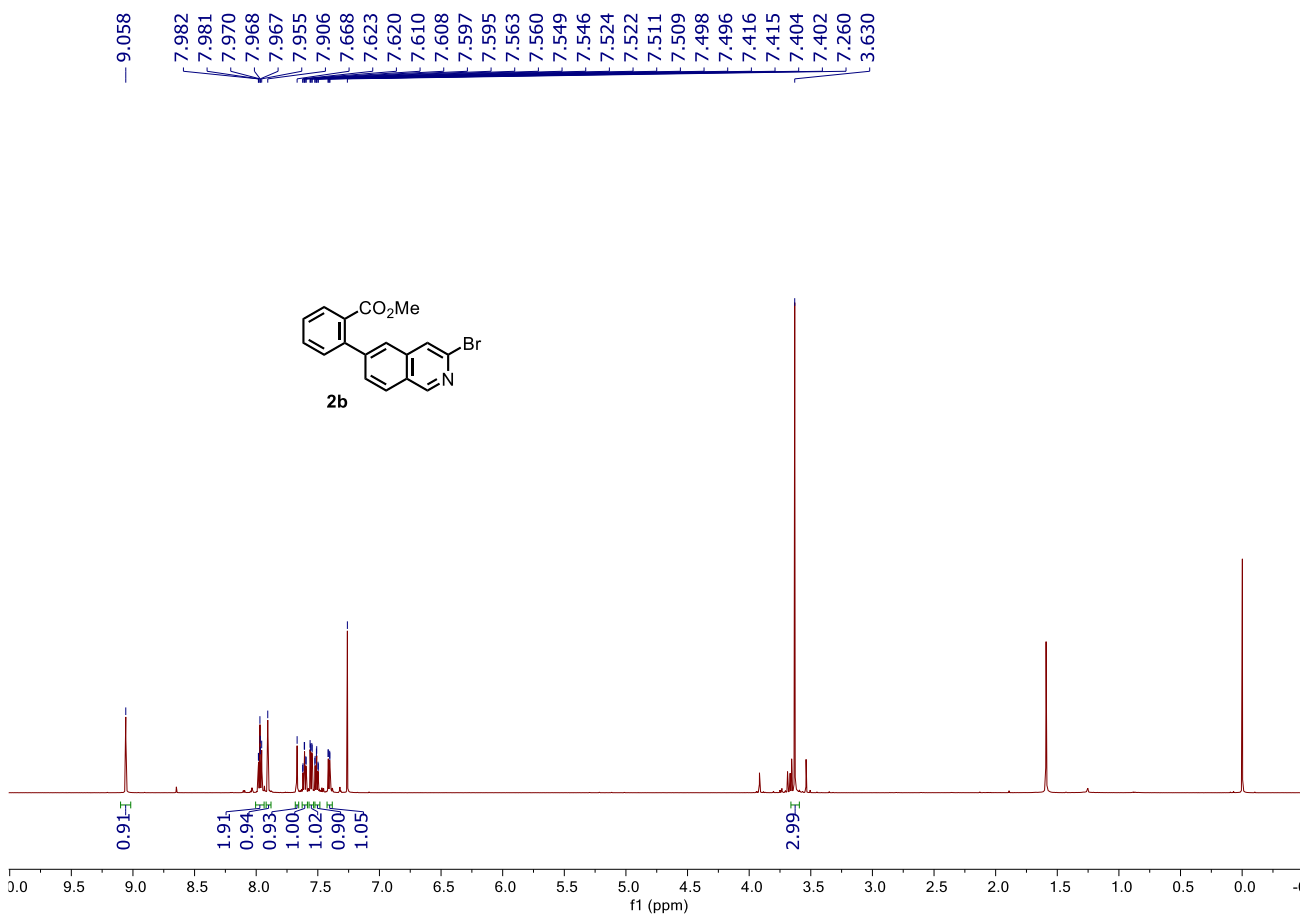

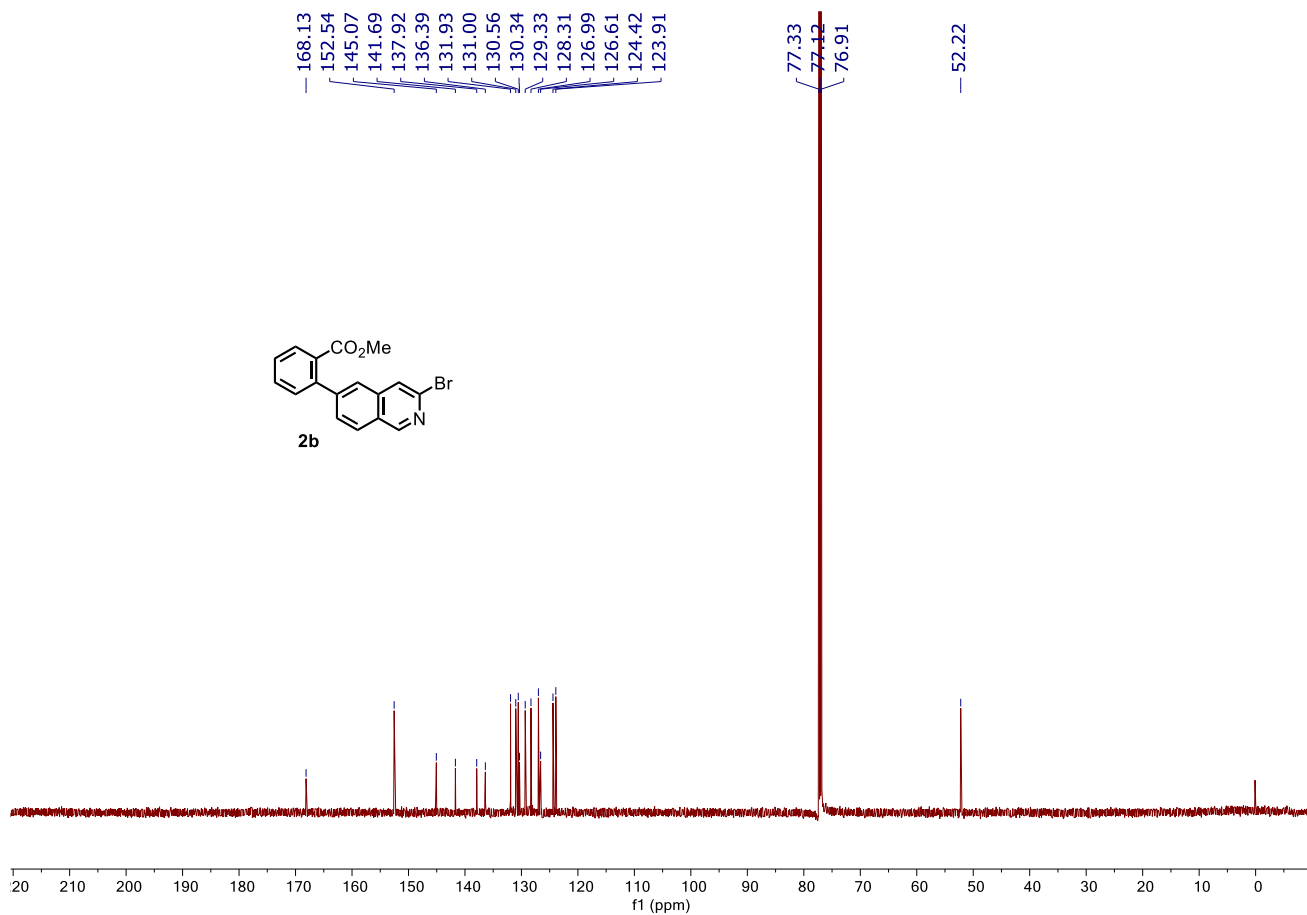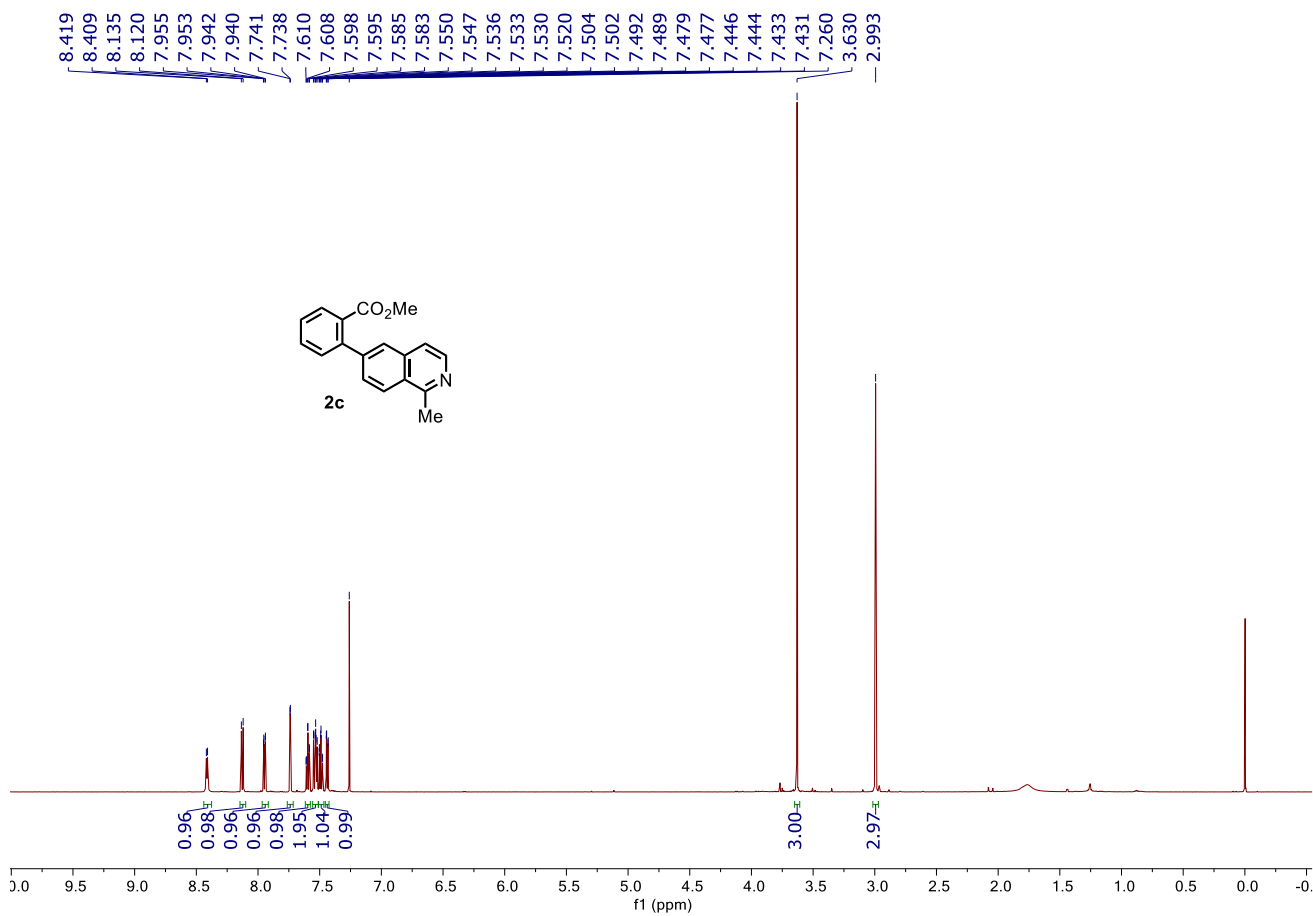

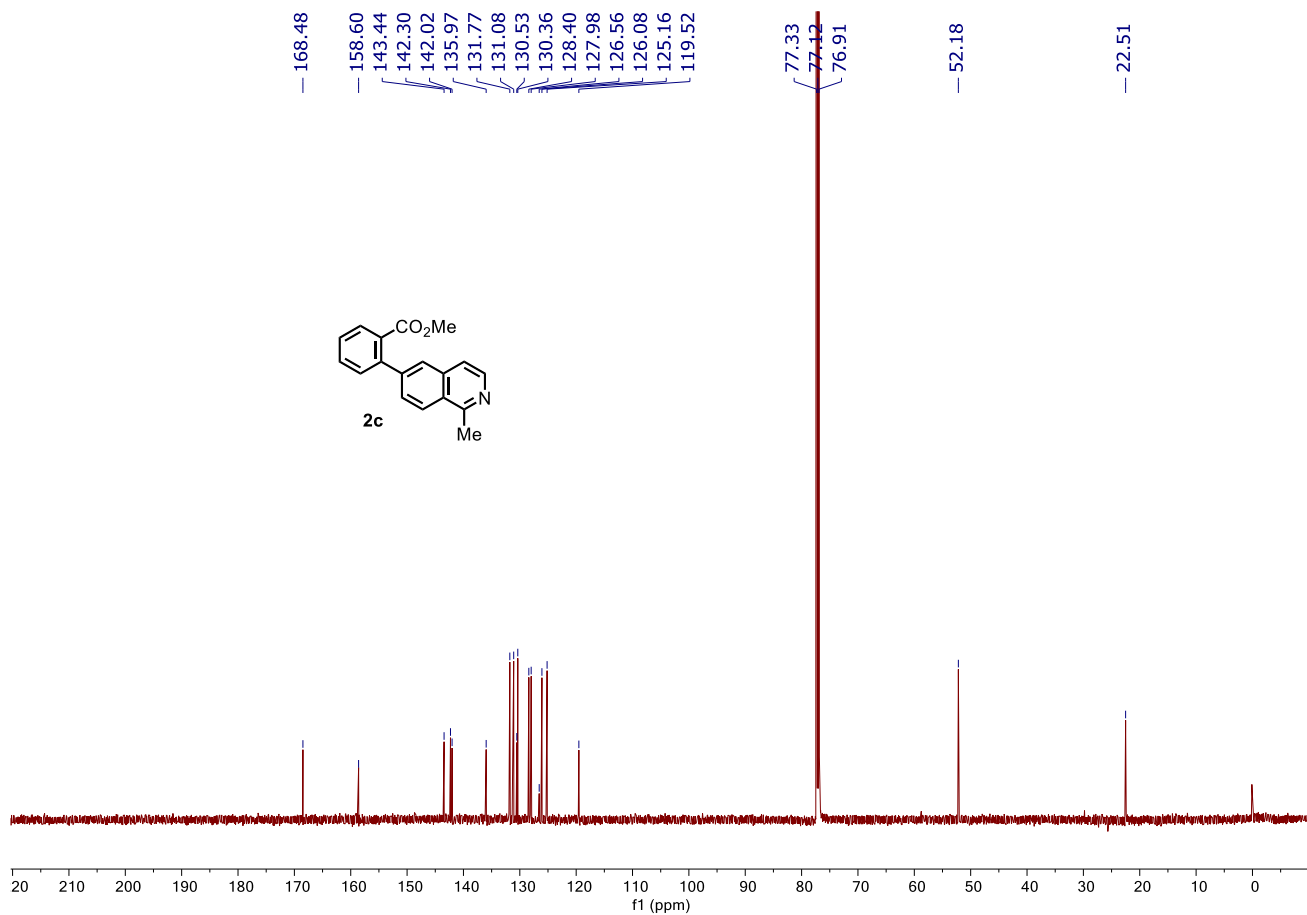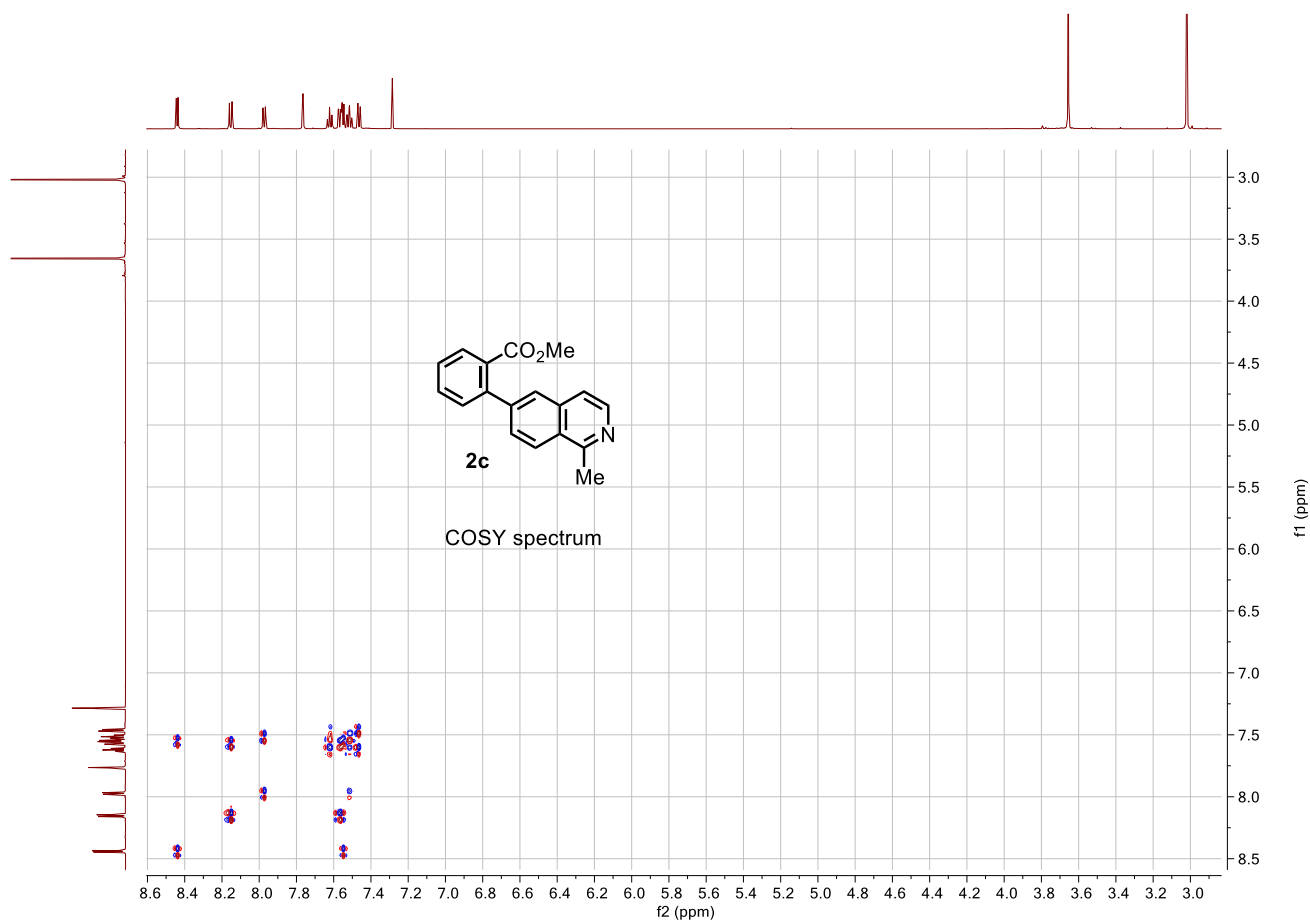

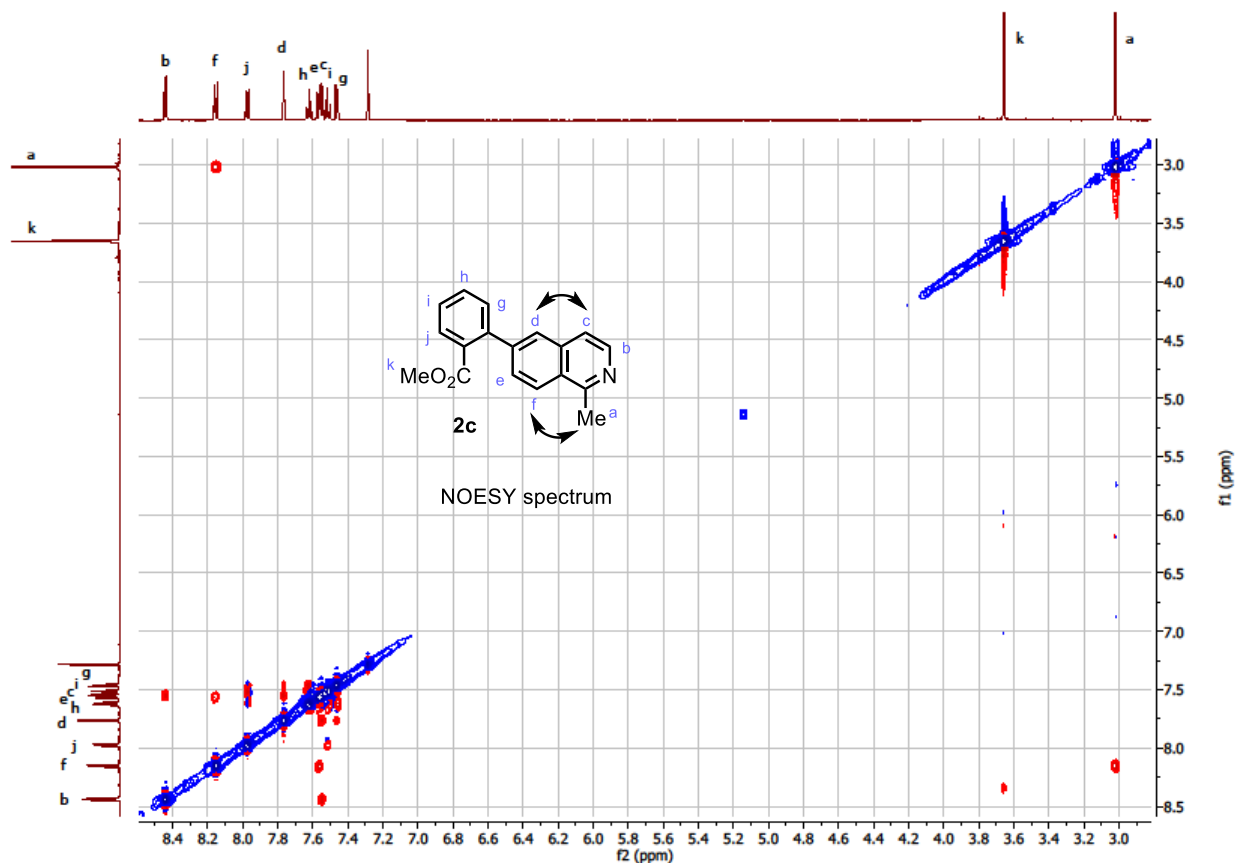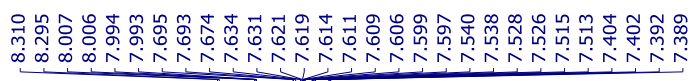

3.654

1.564

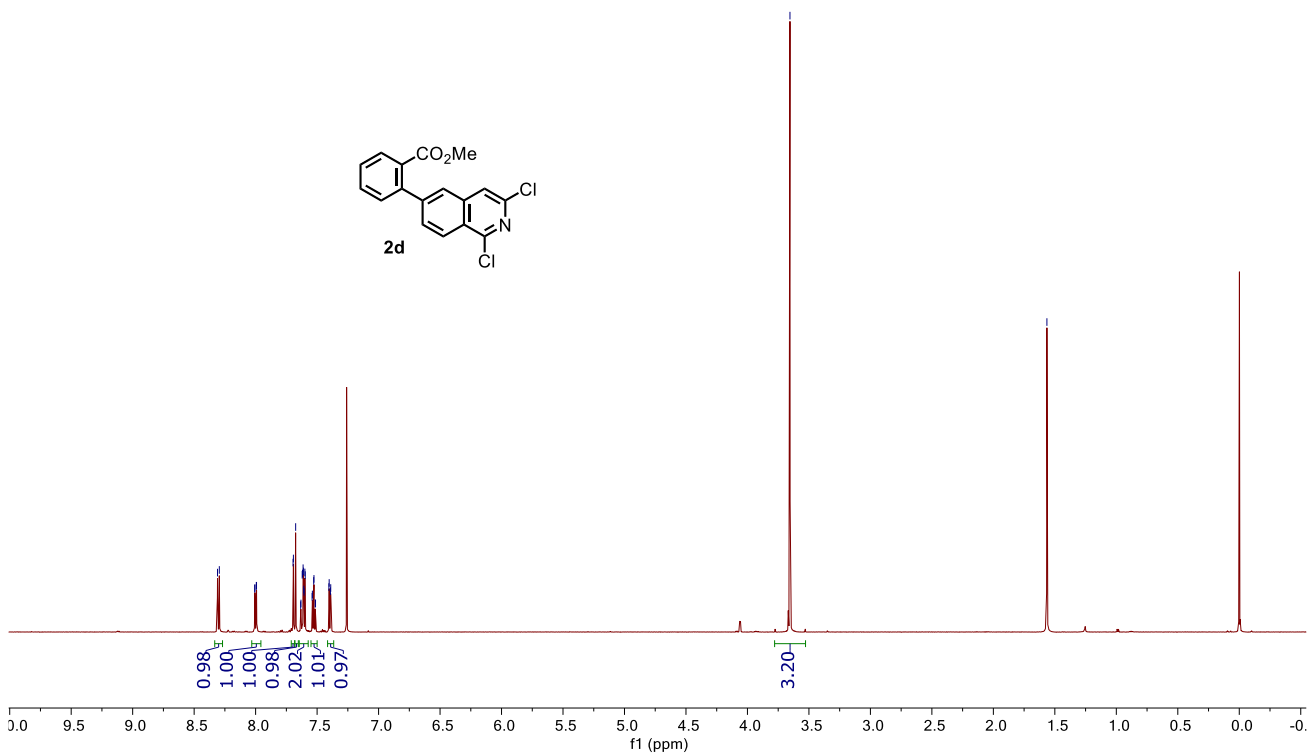

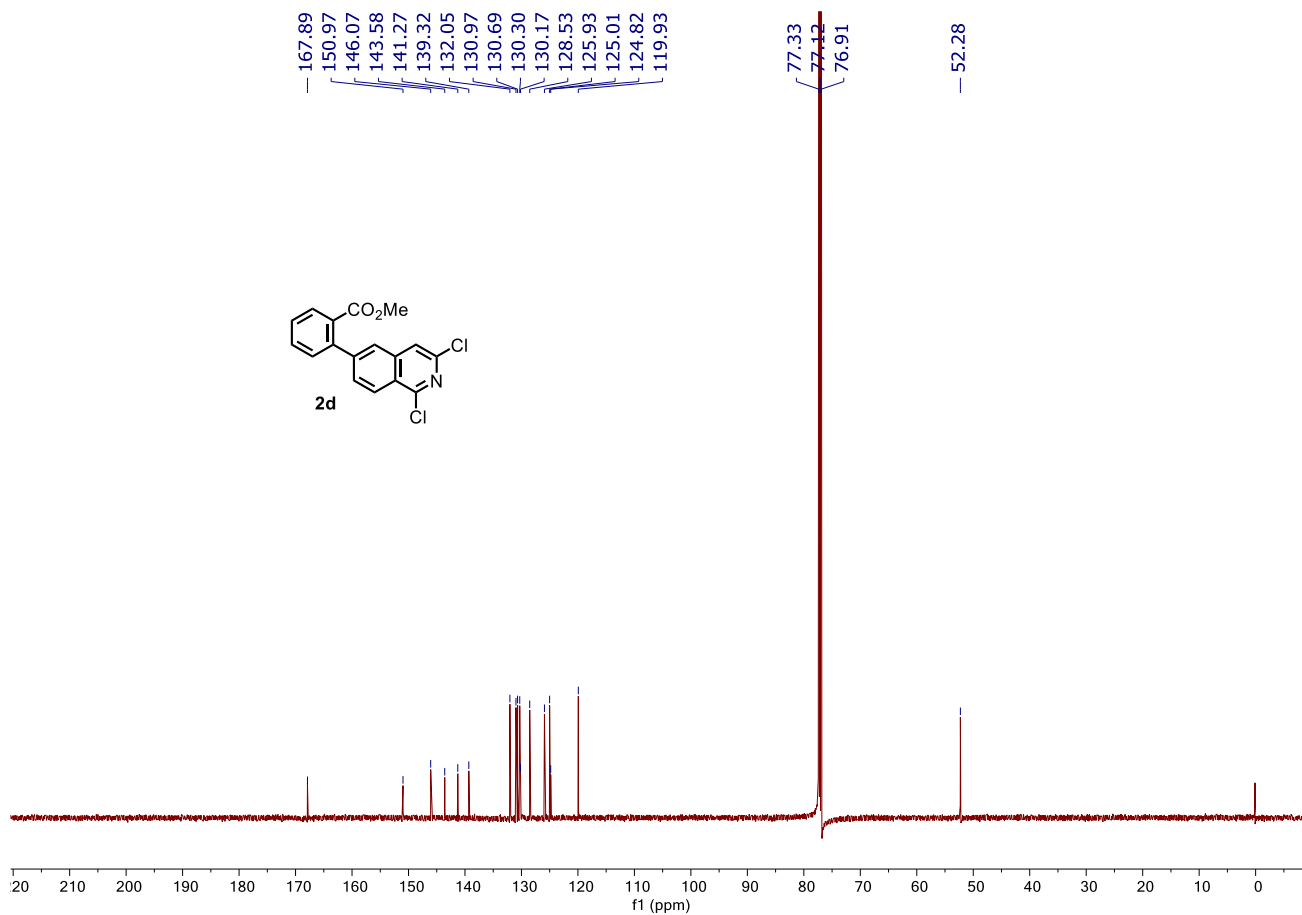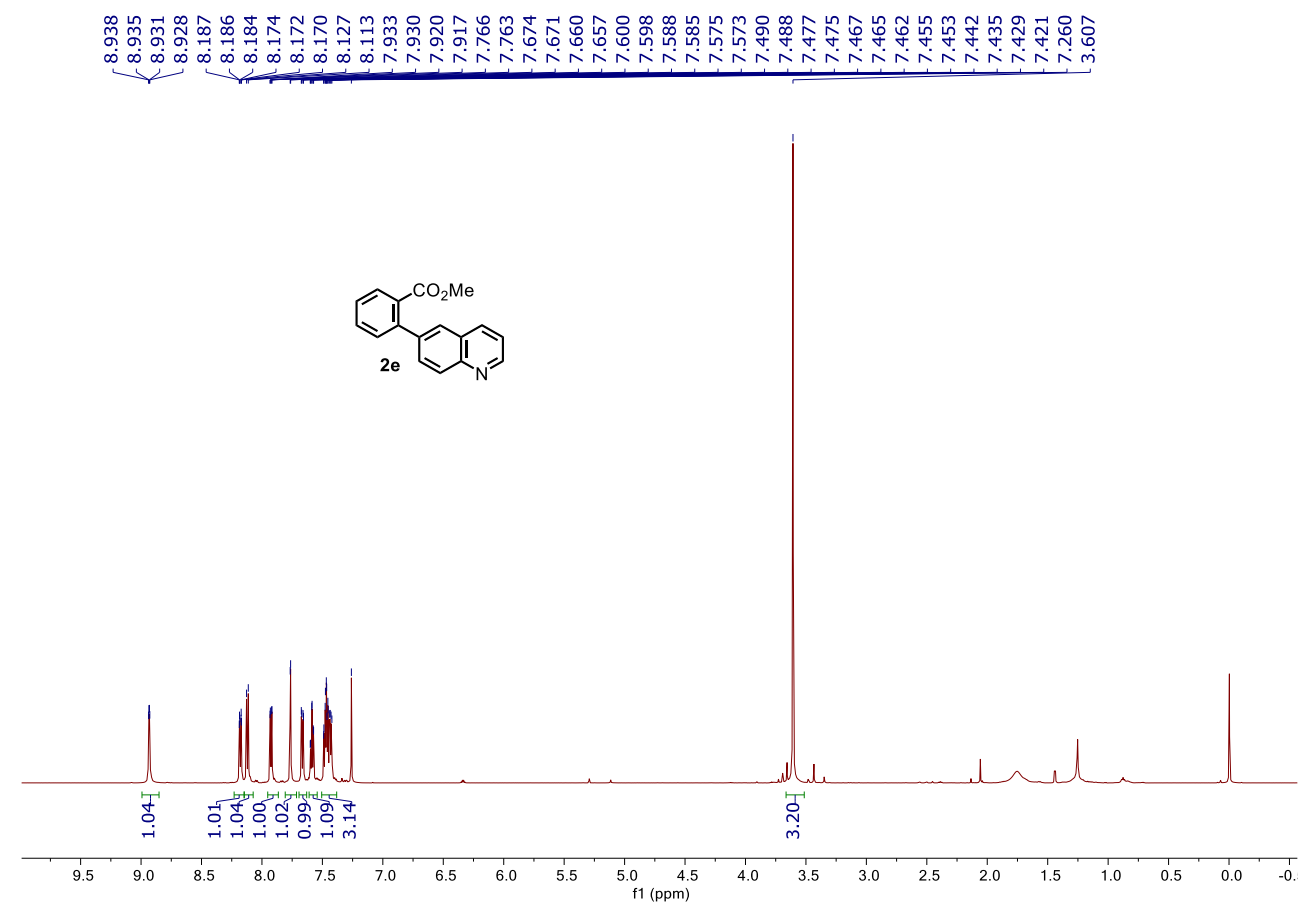

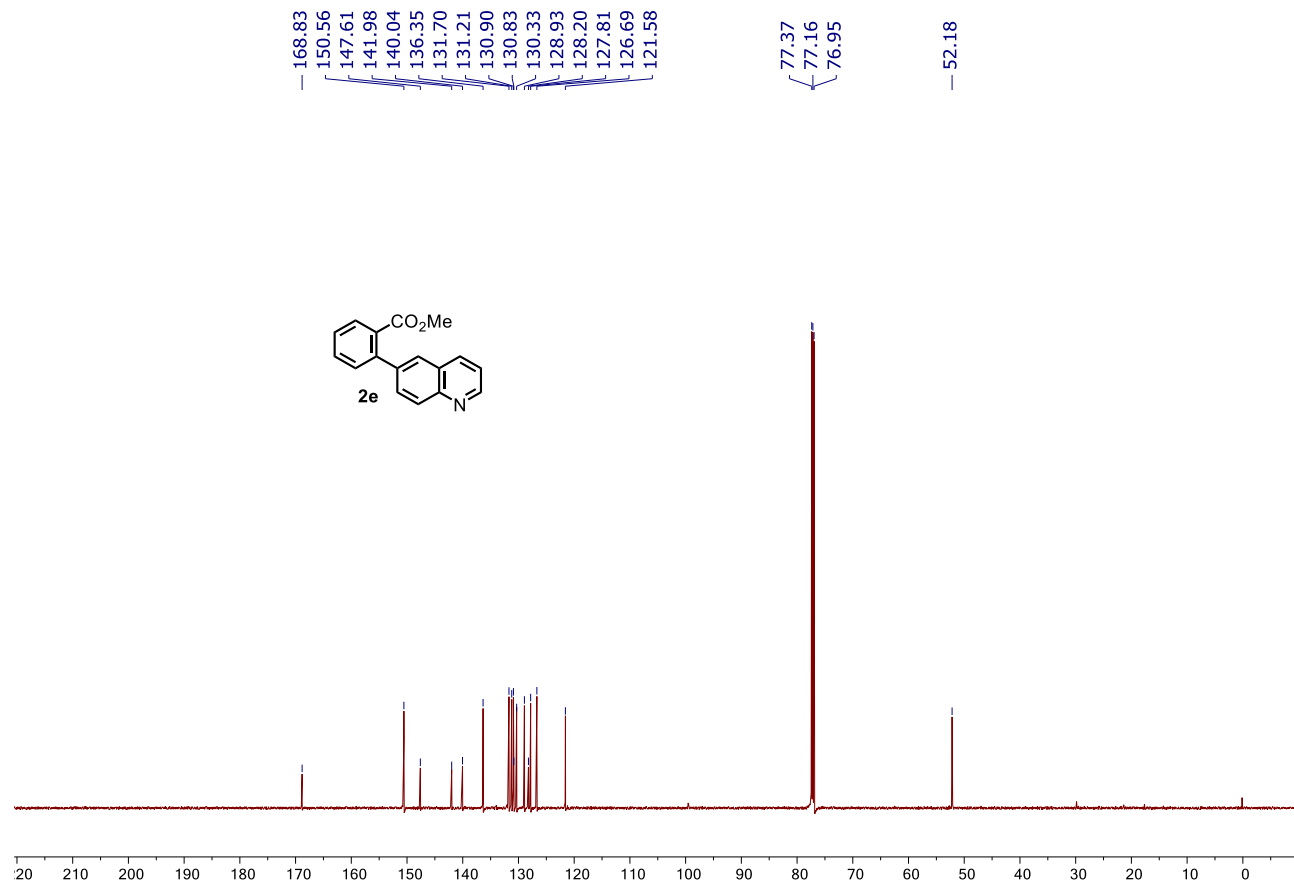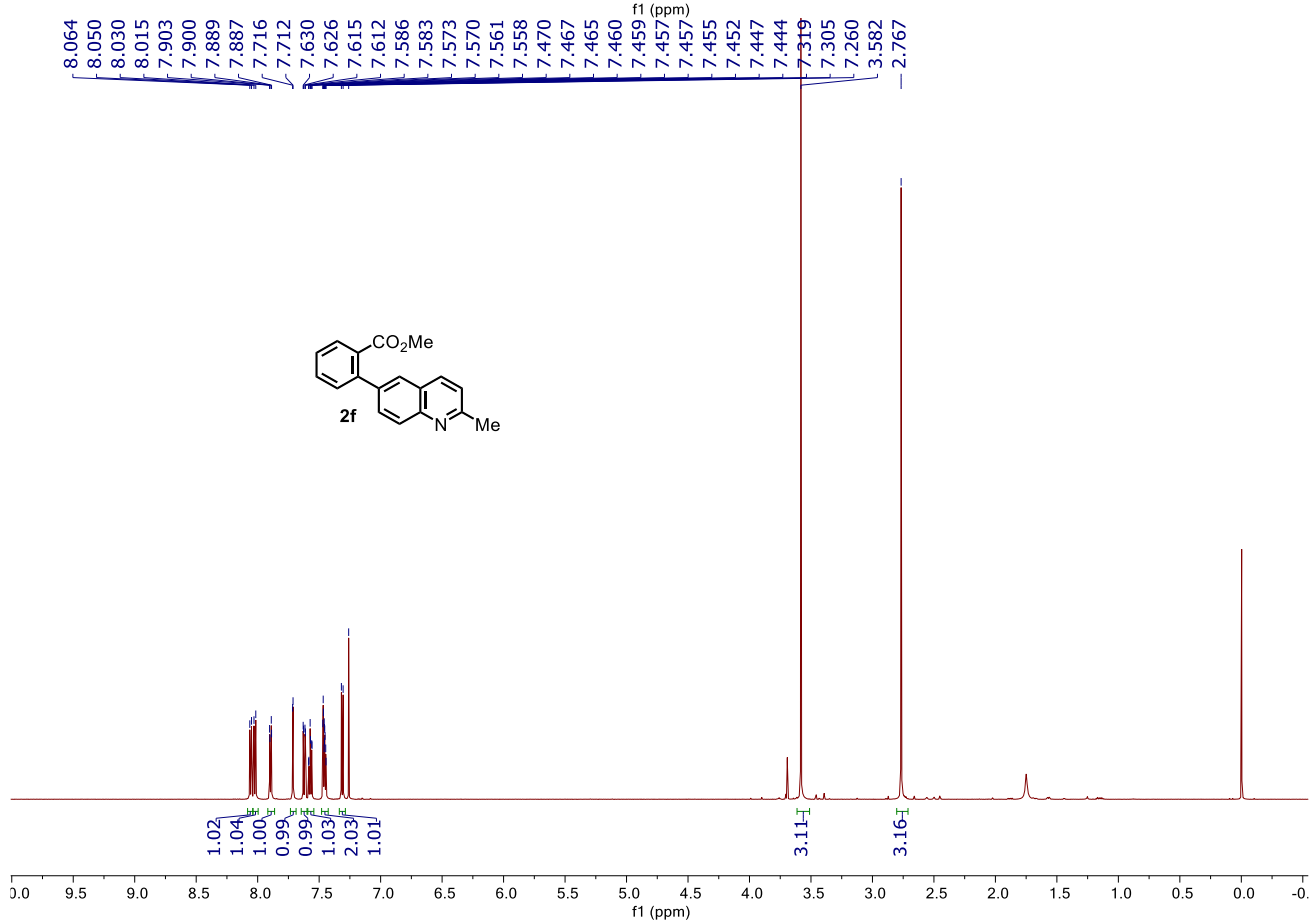

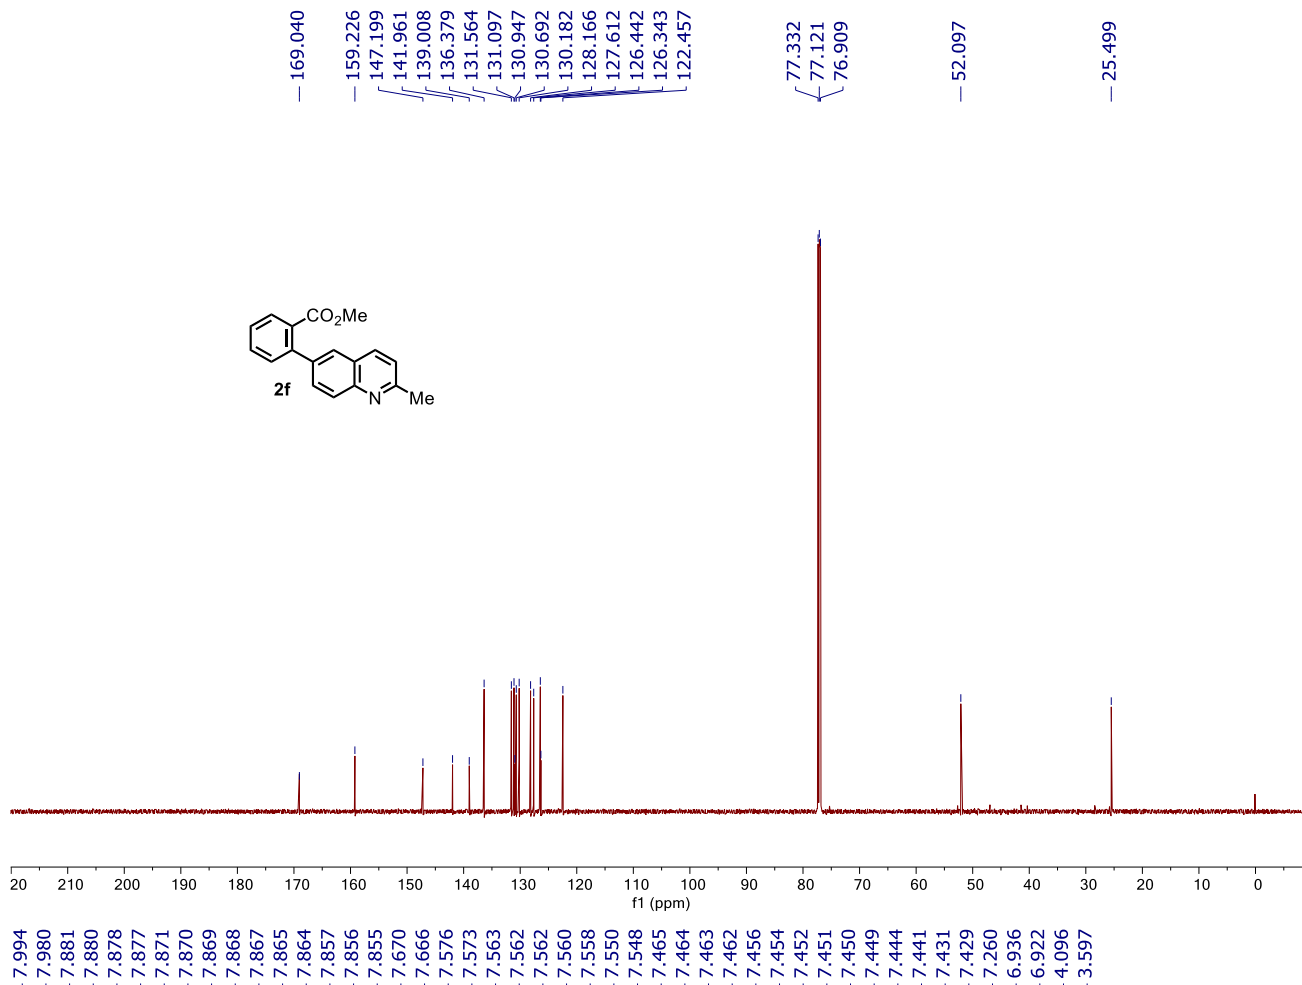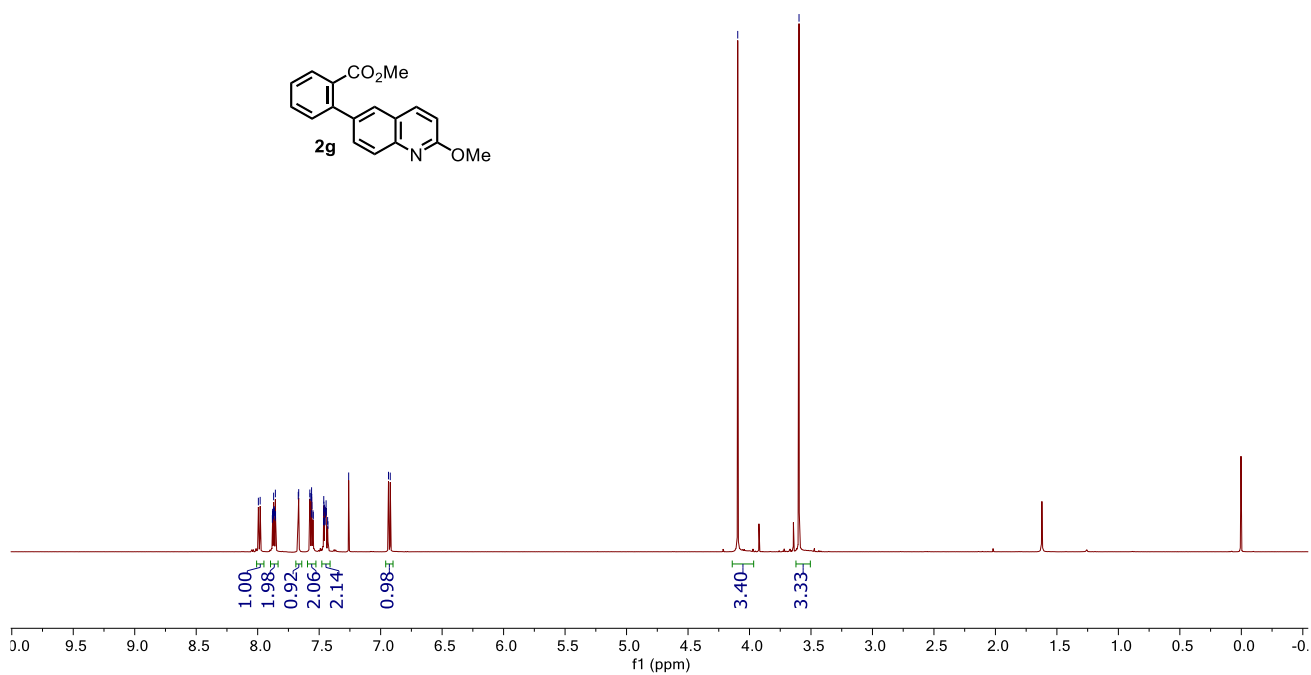

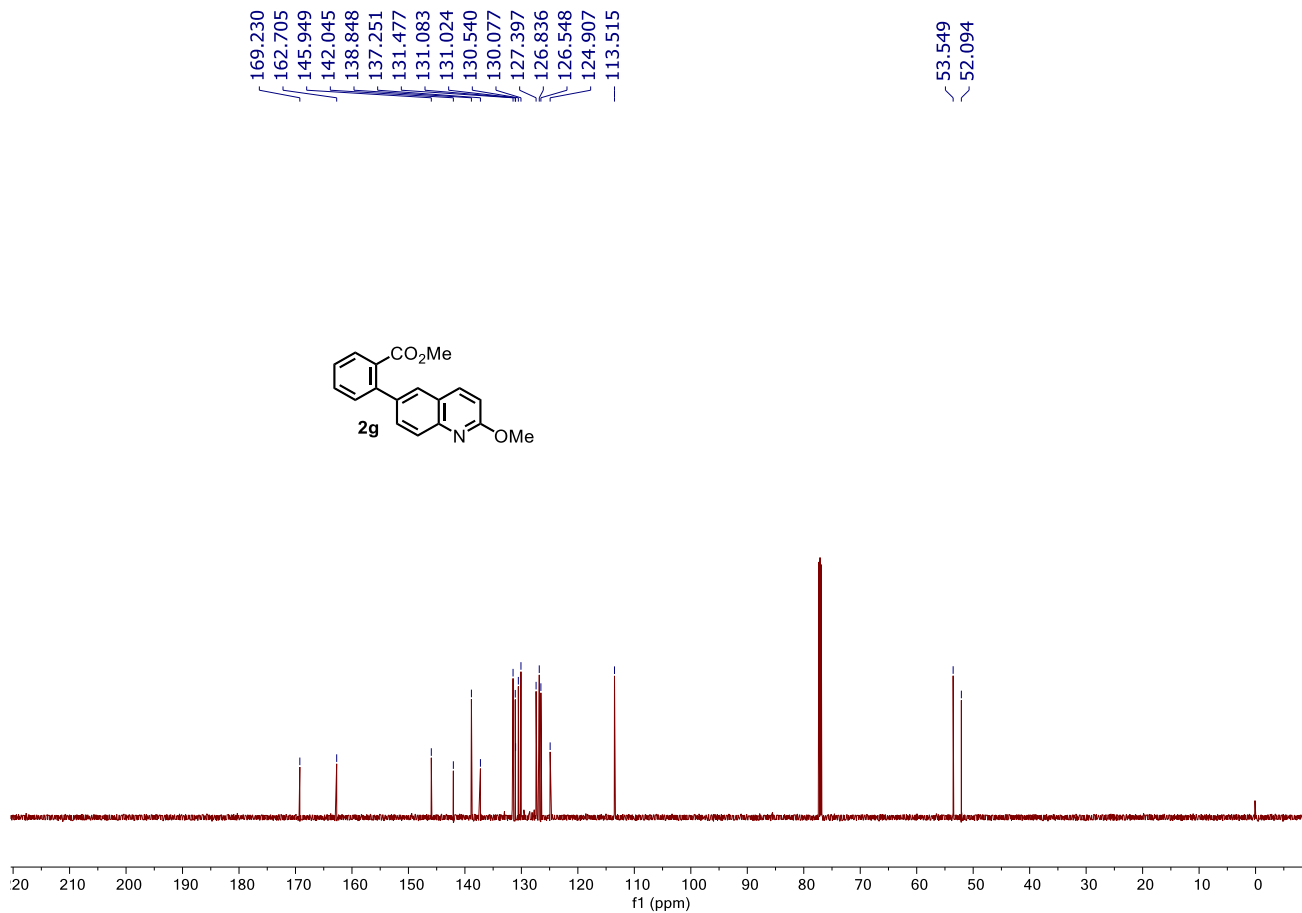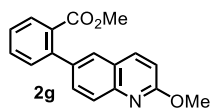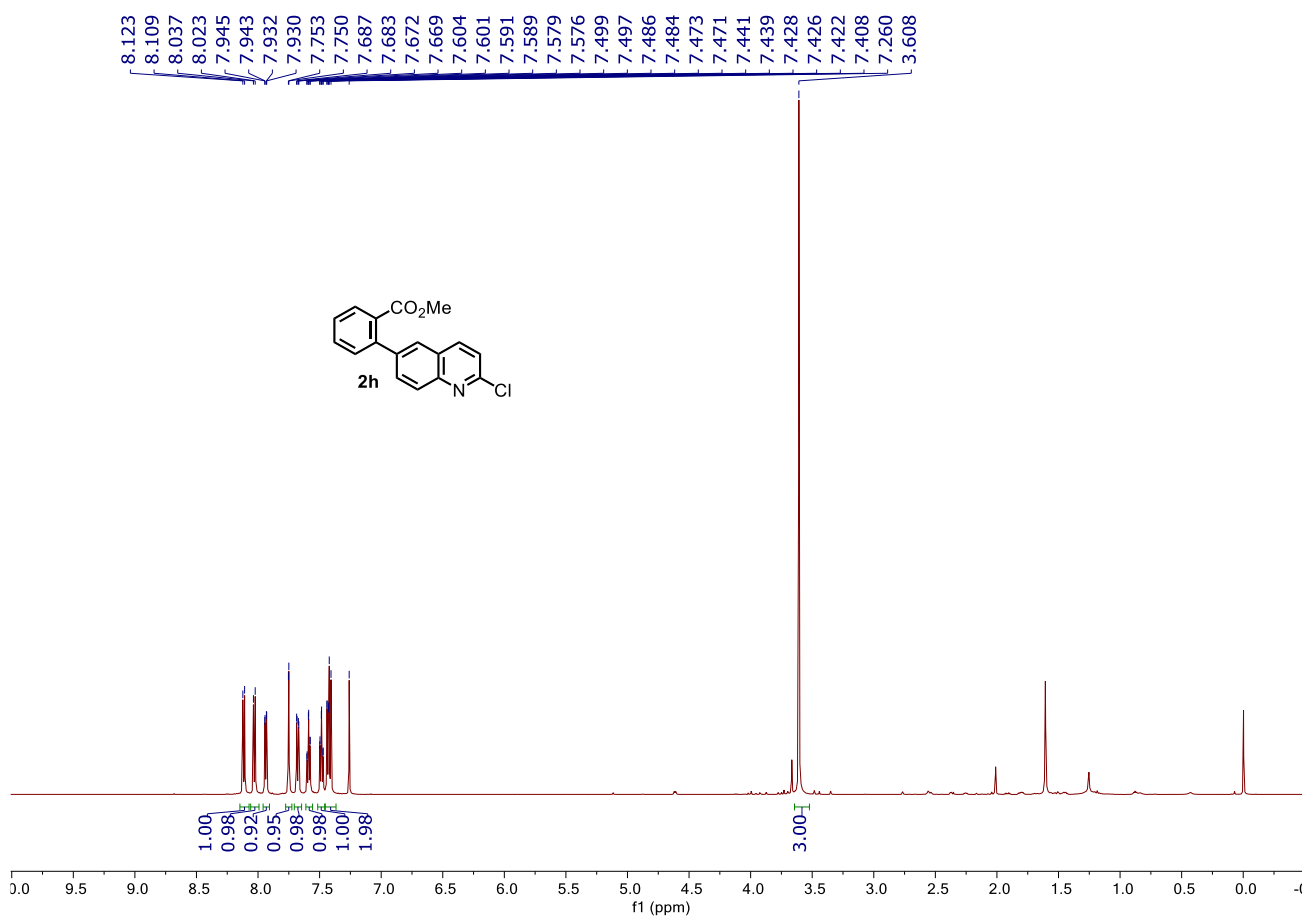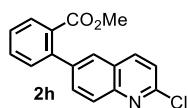



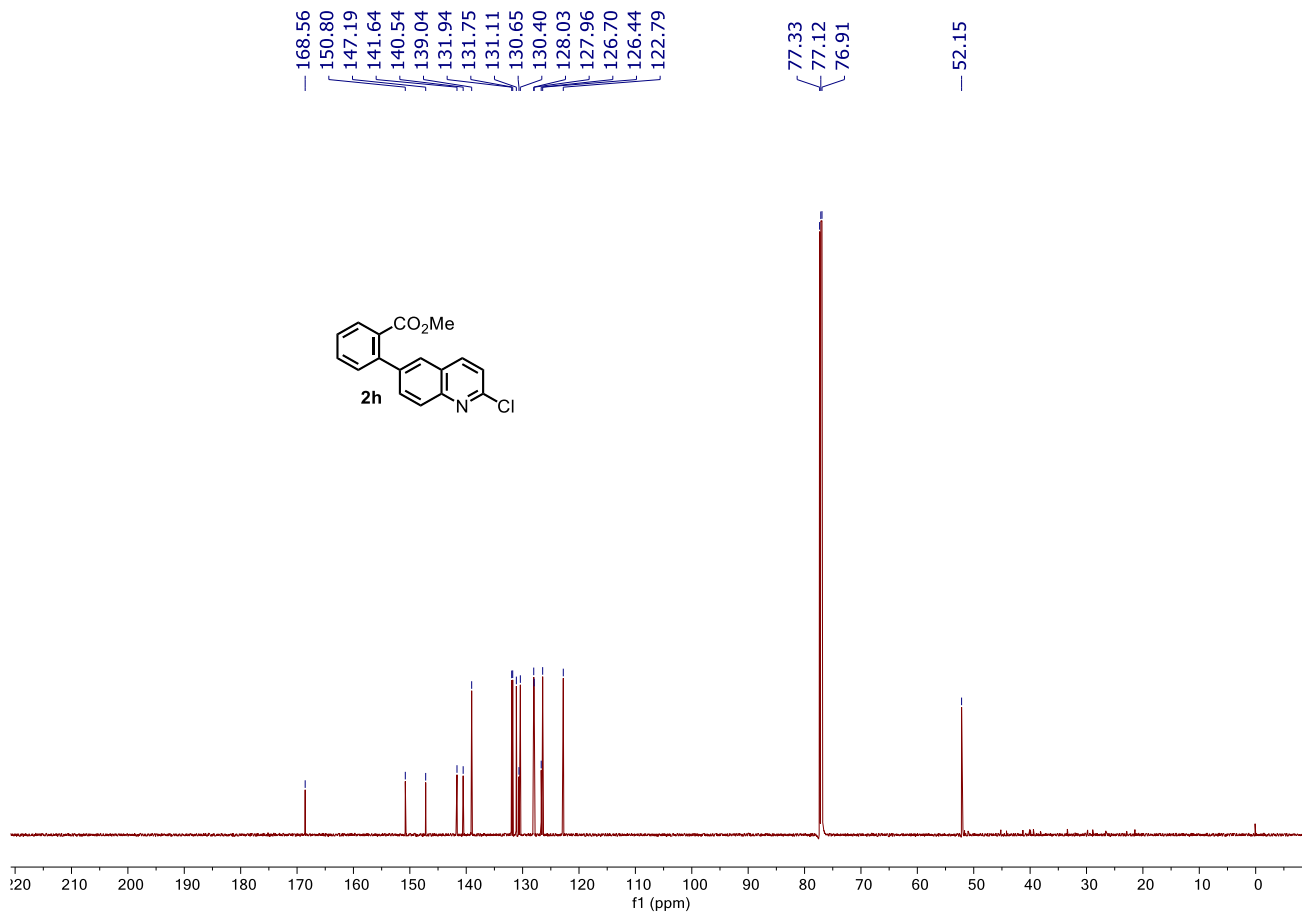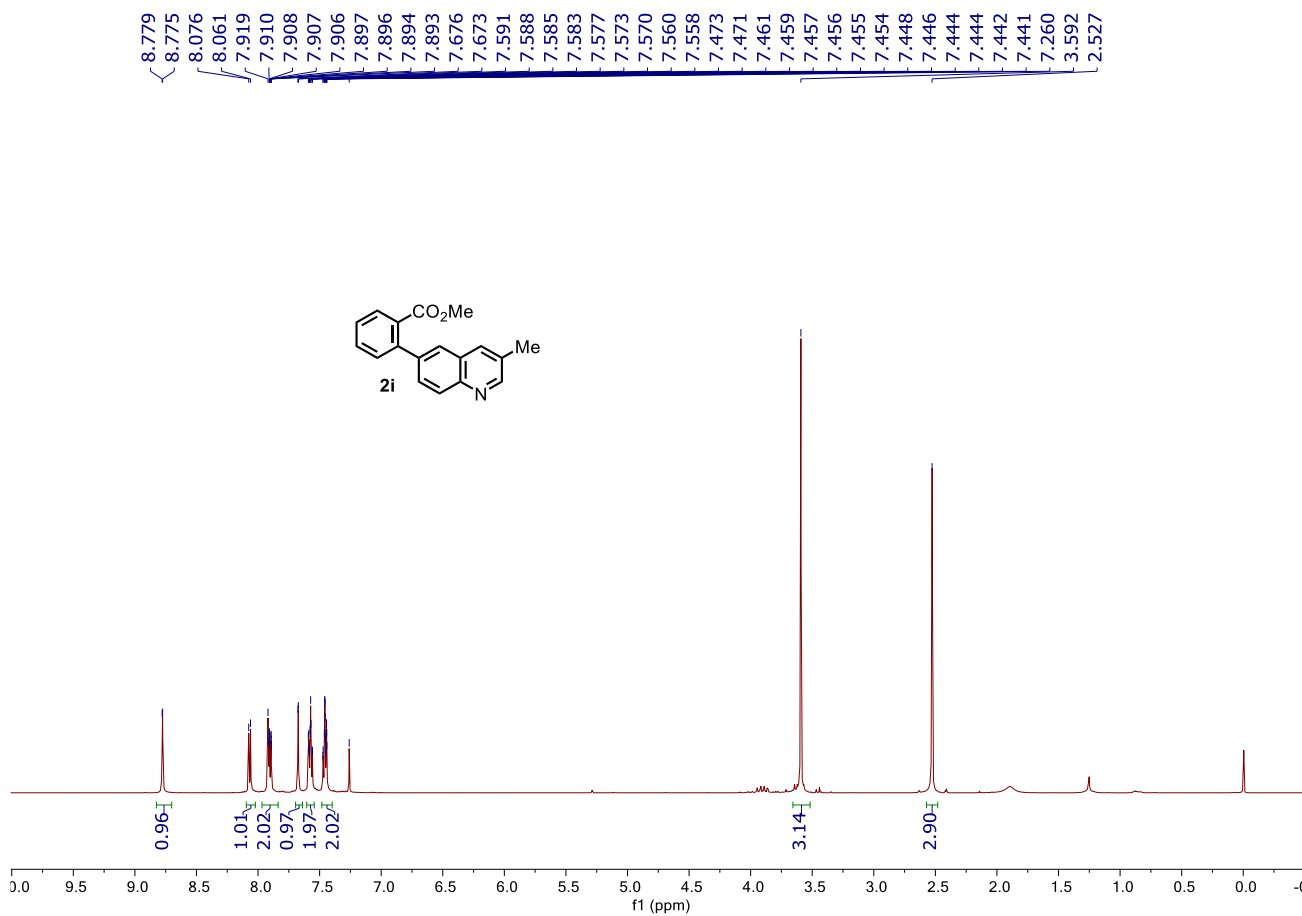

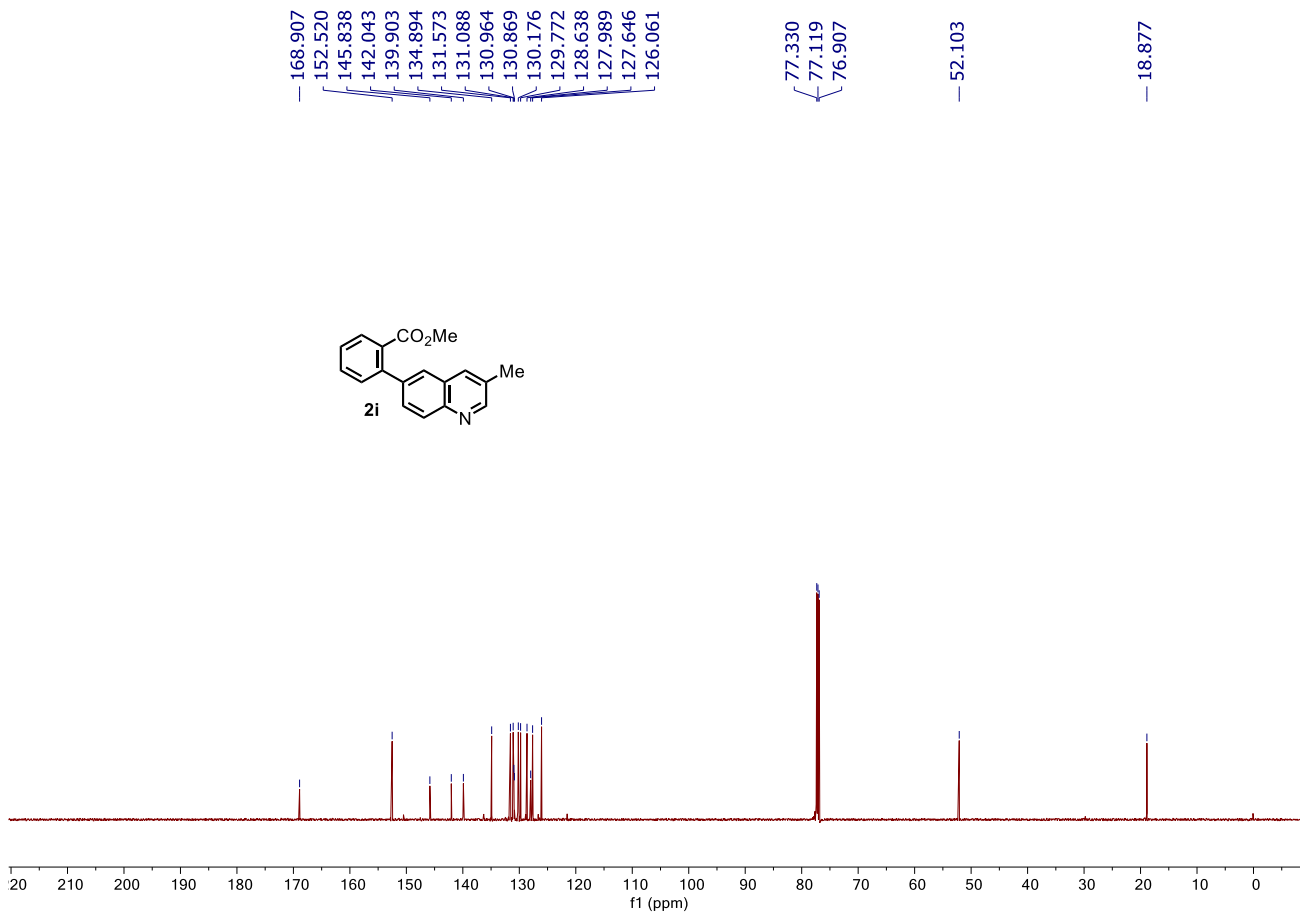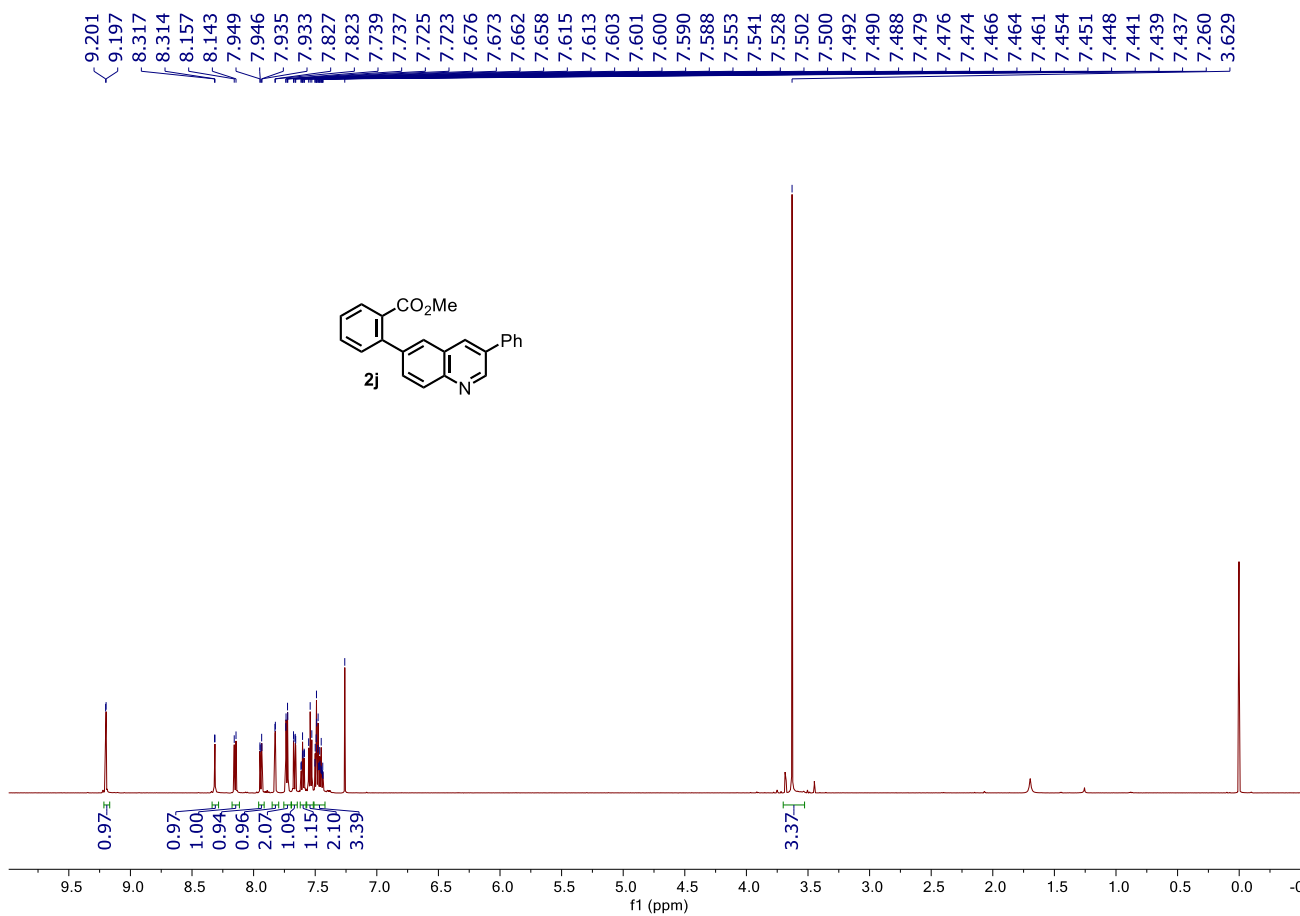

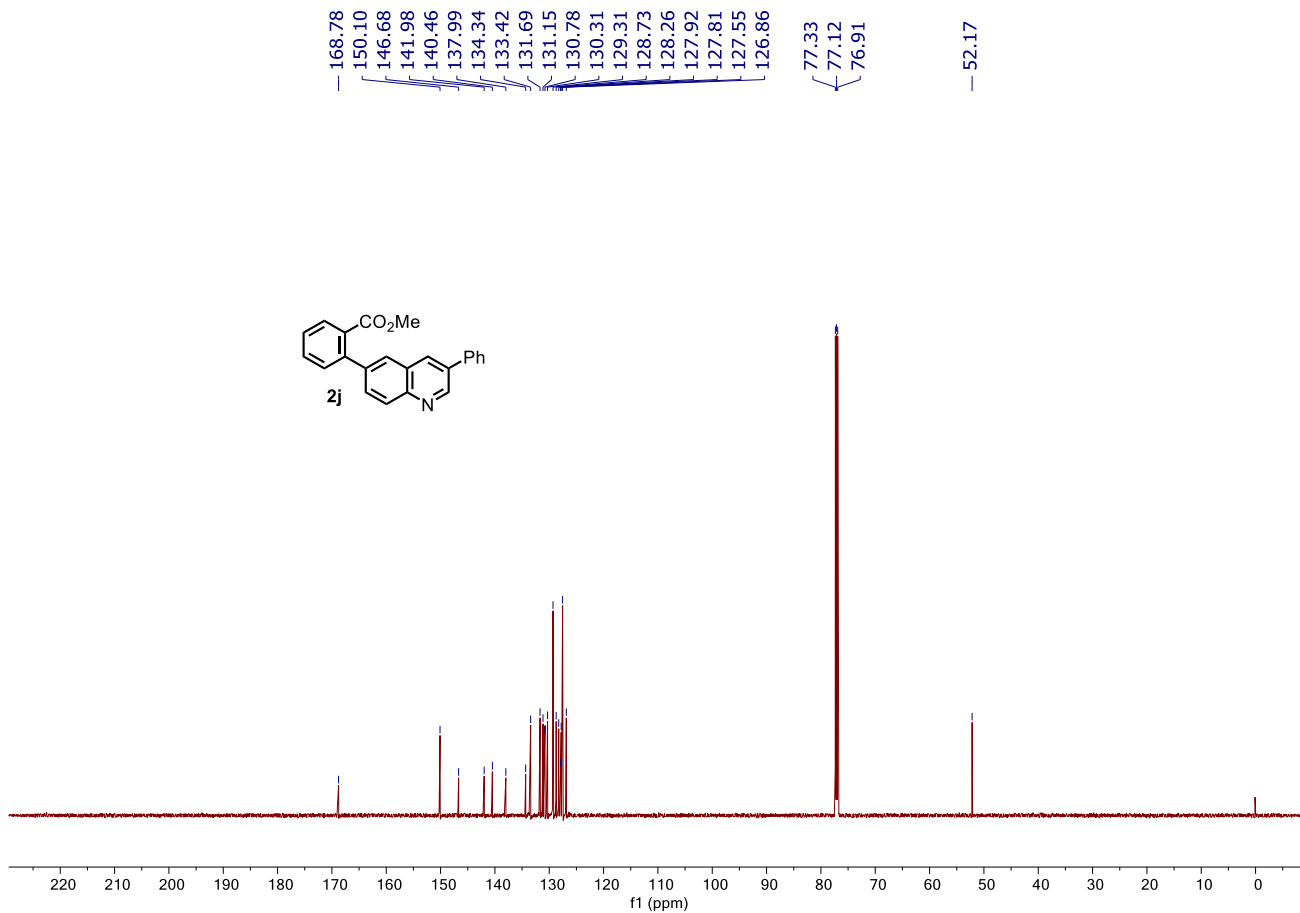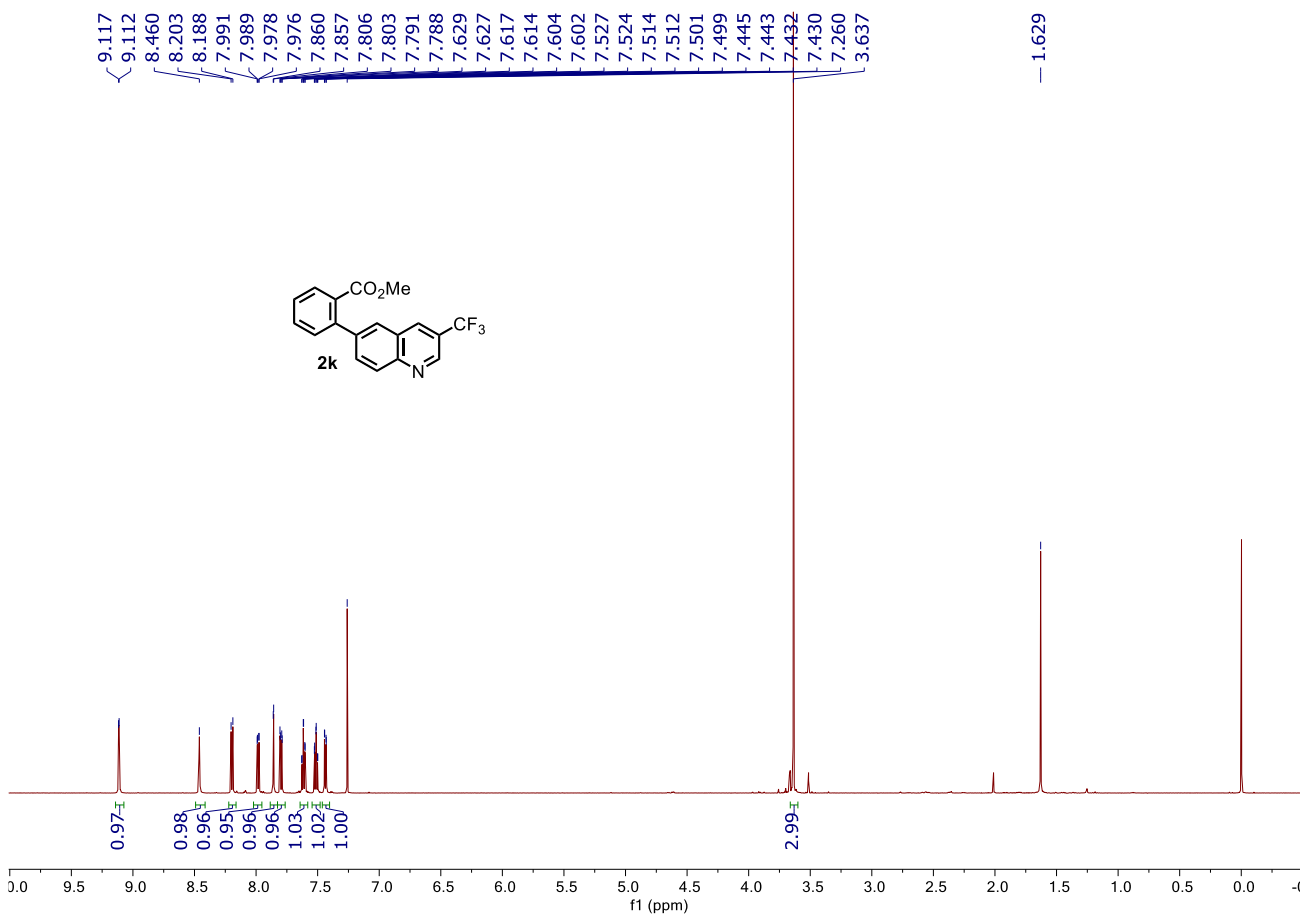

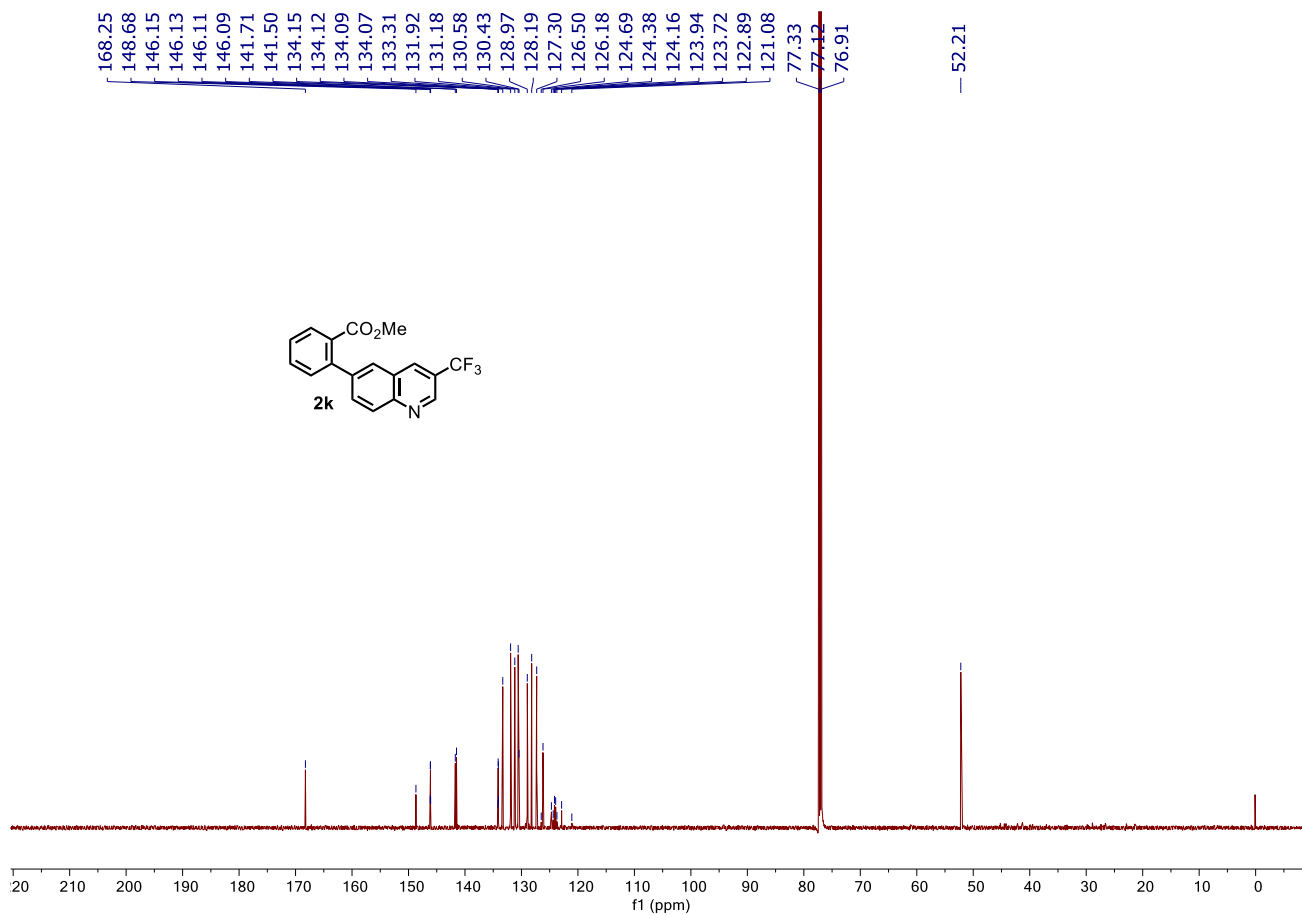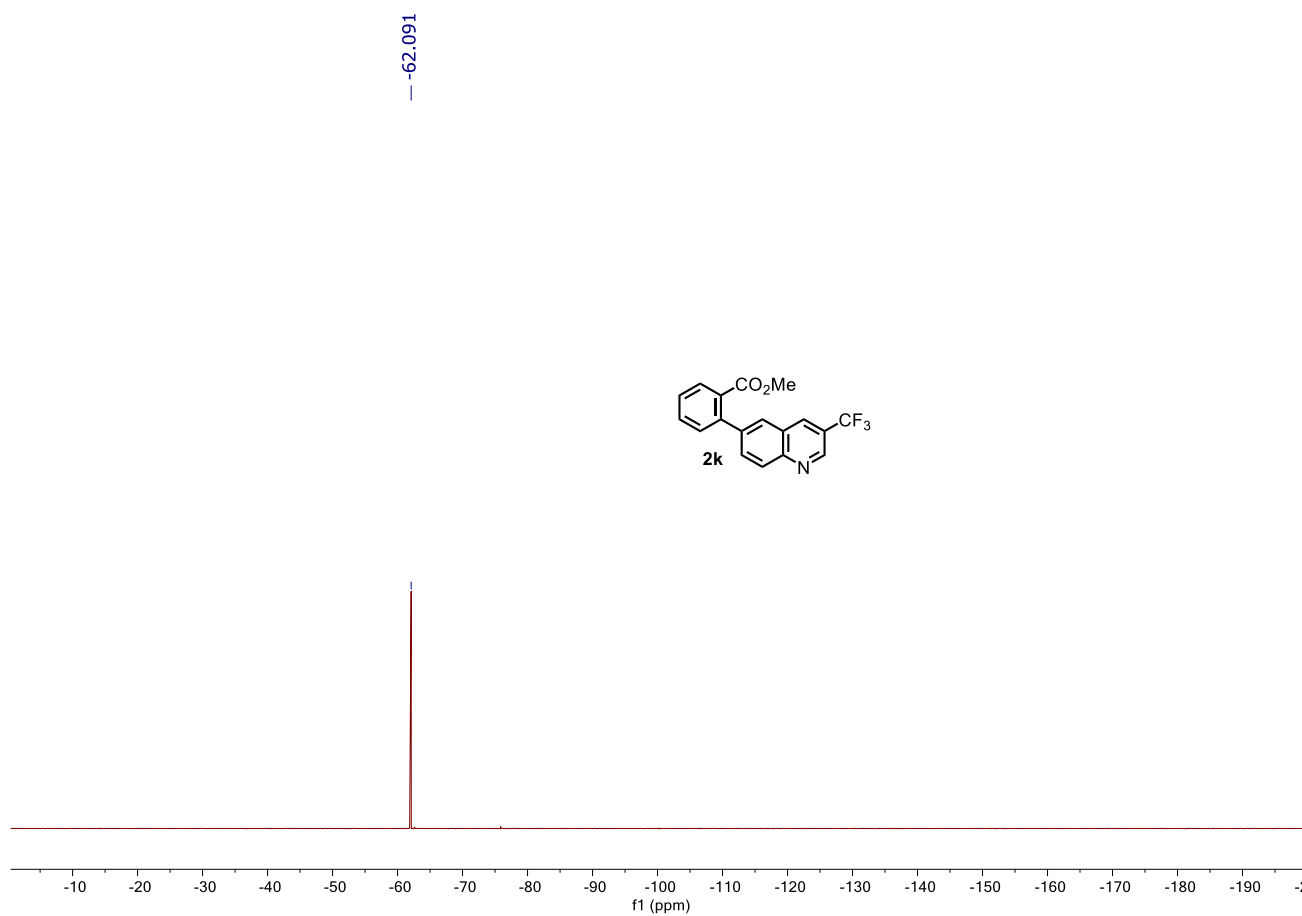

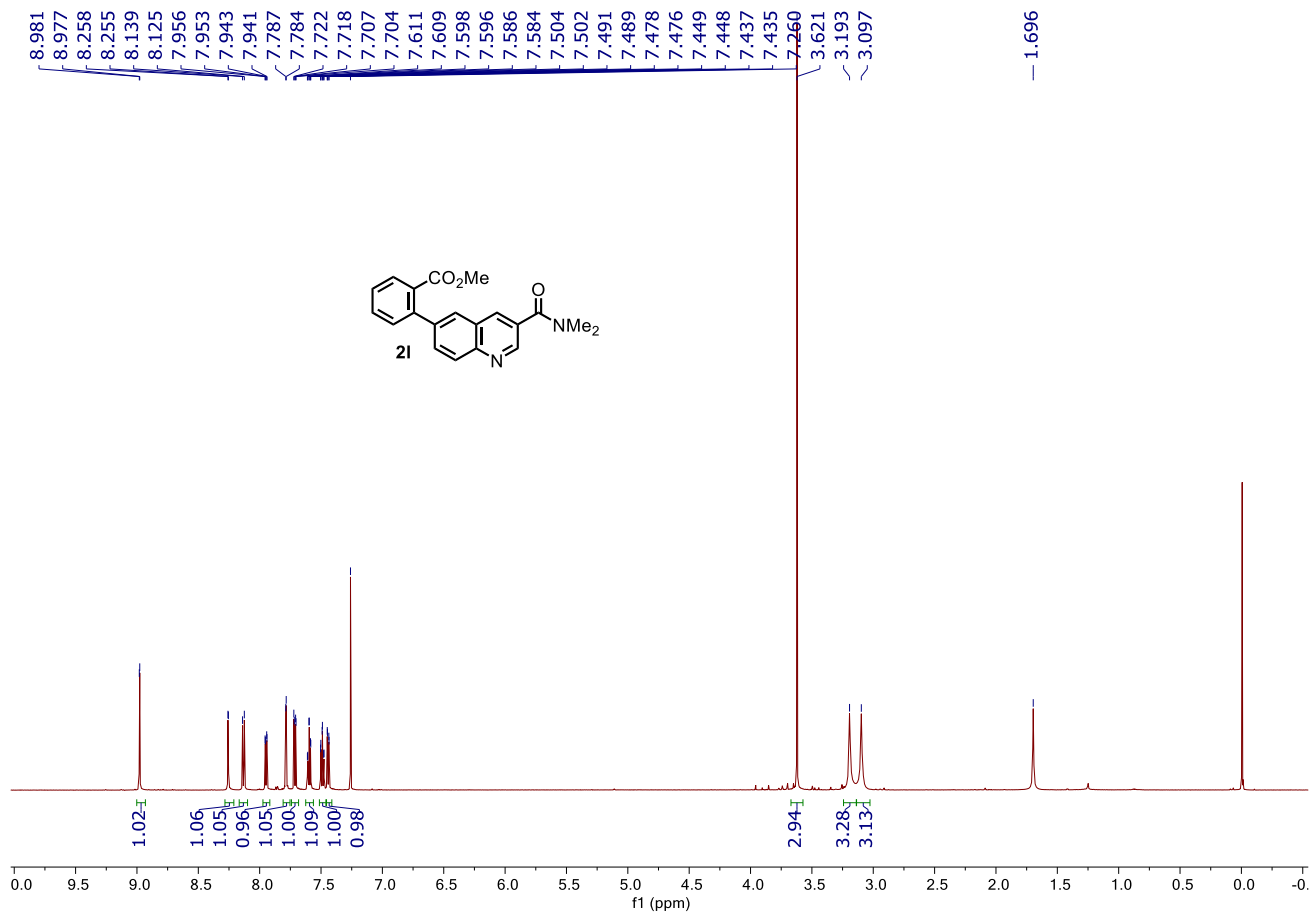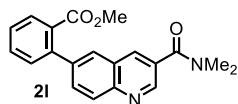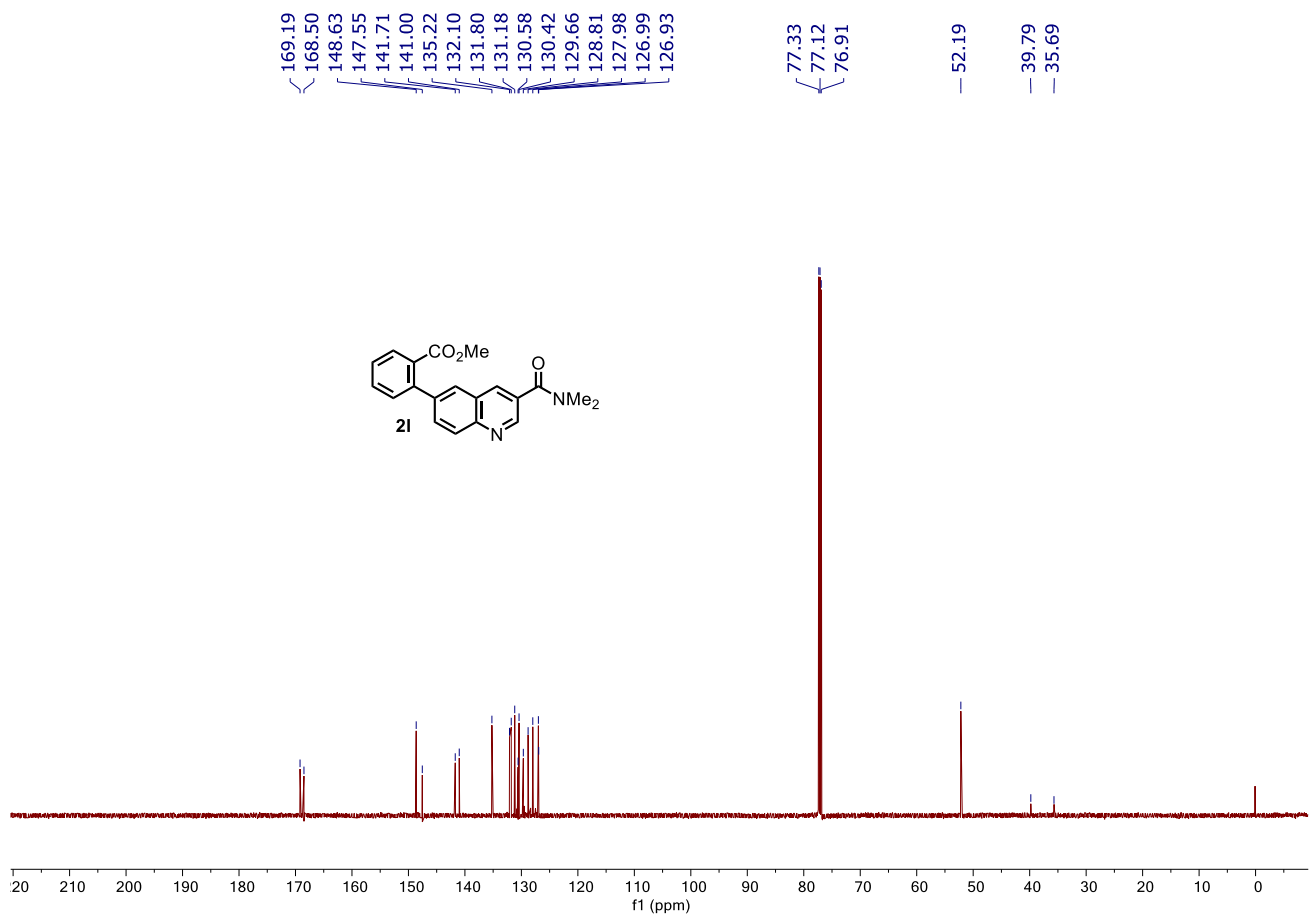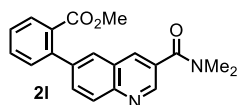

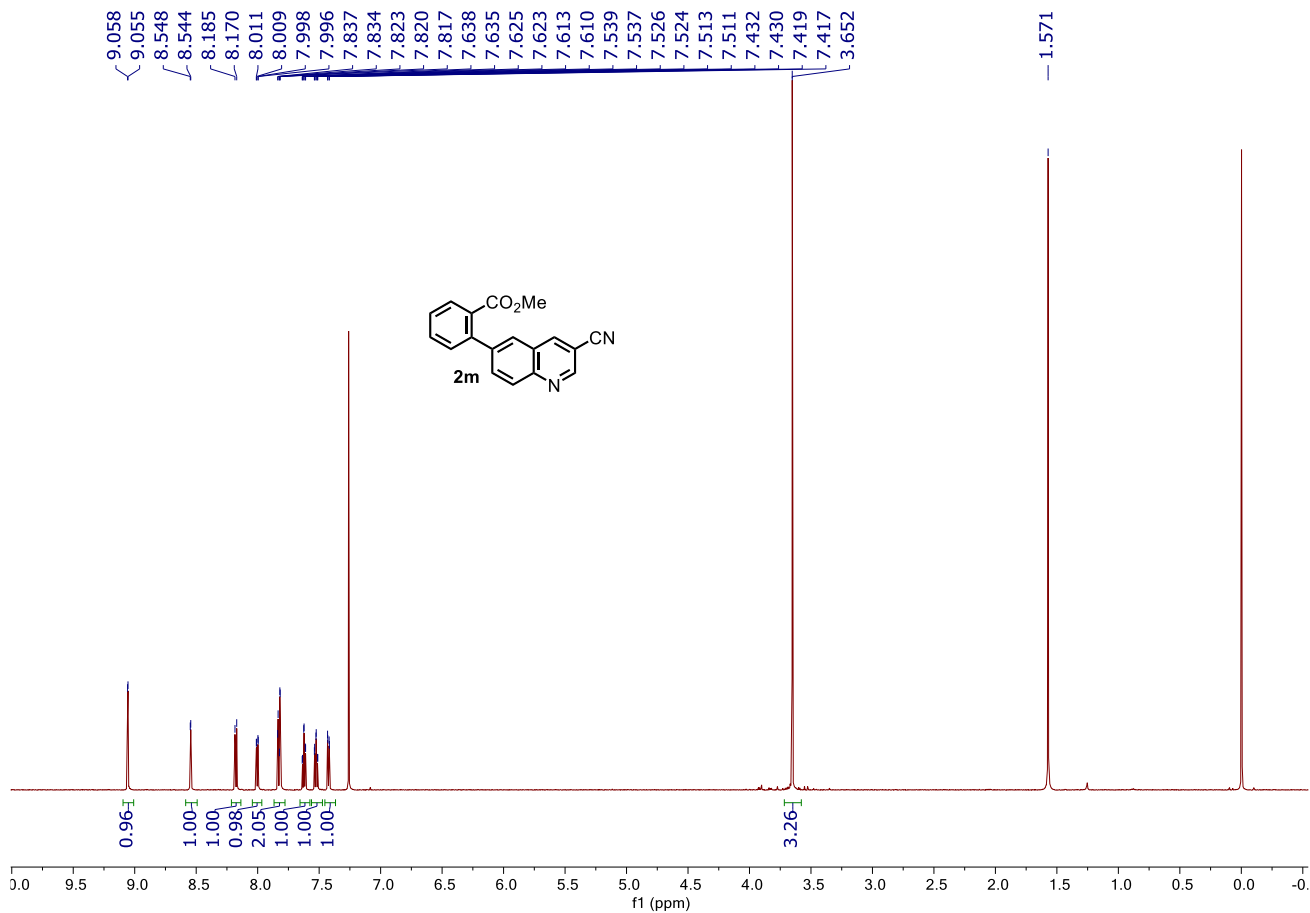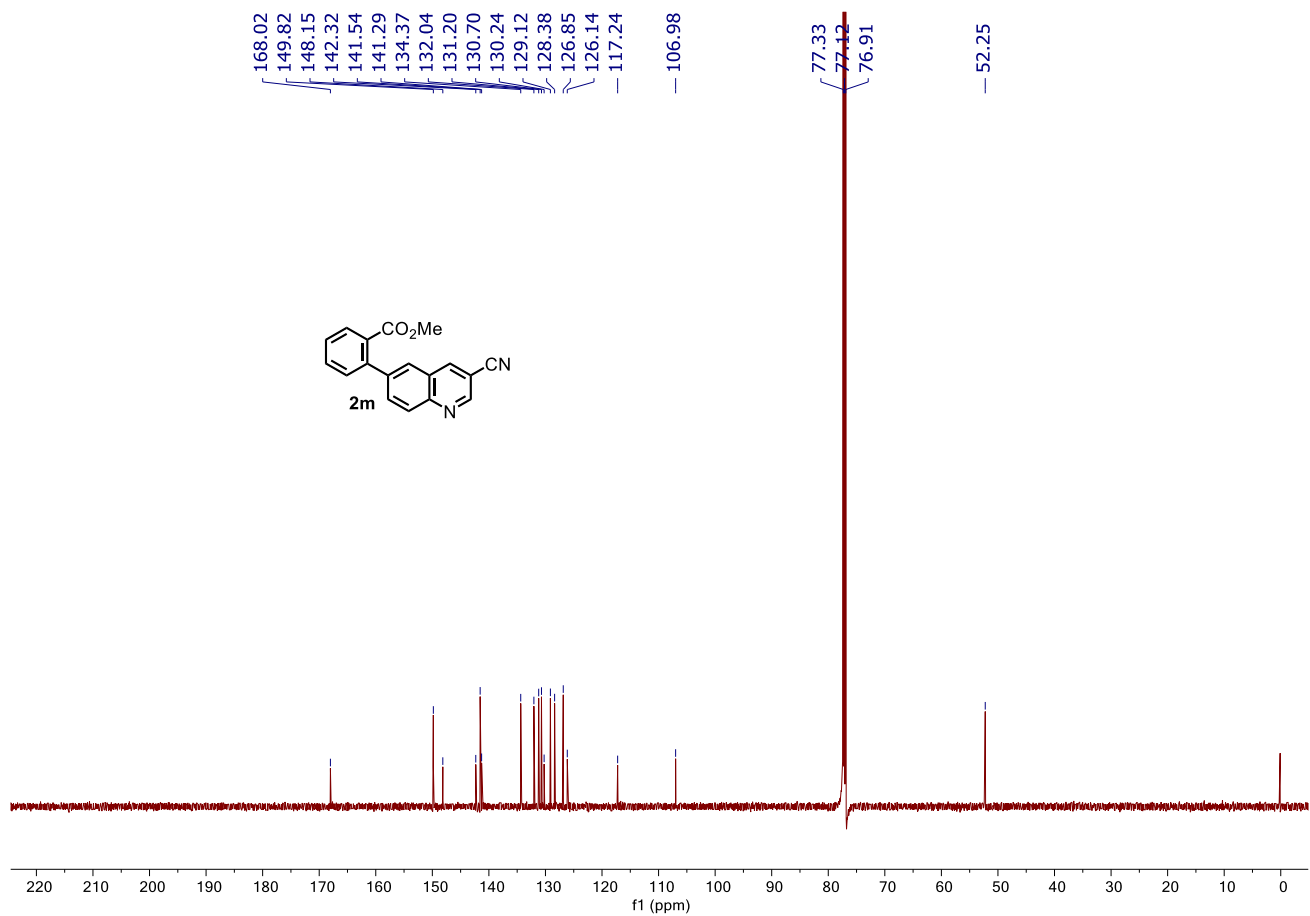

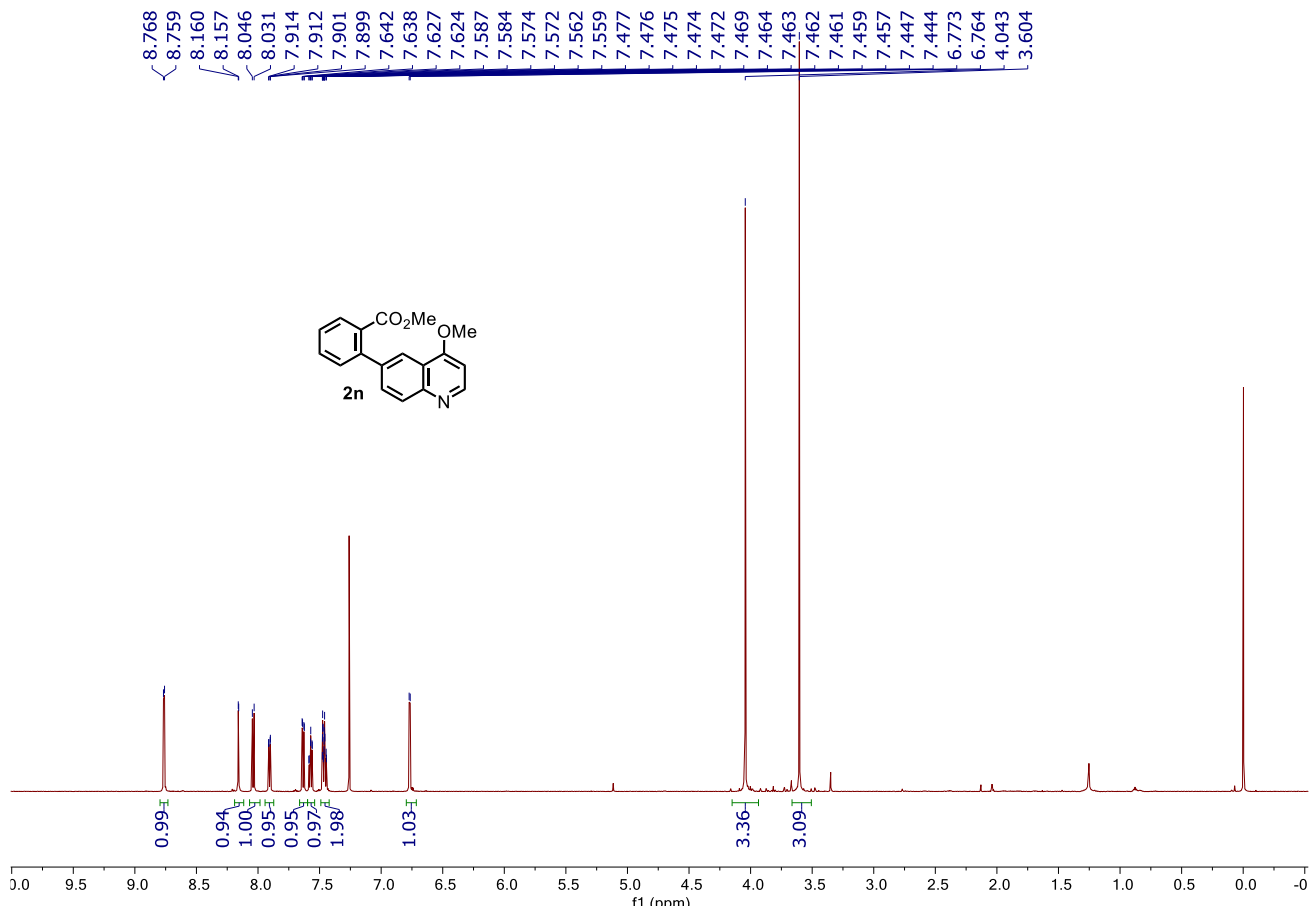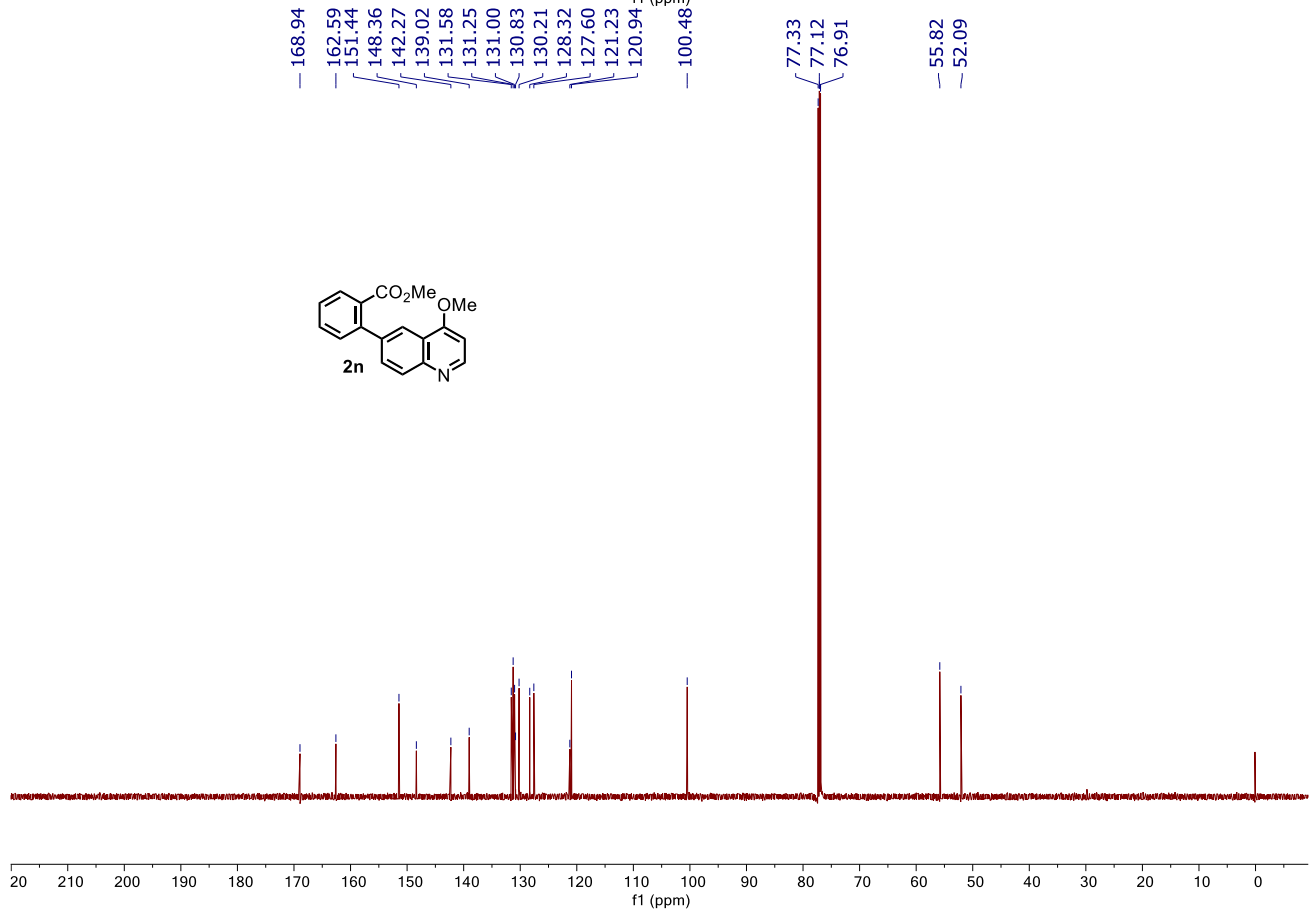

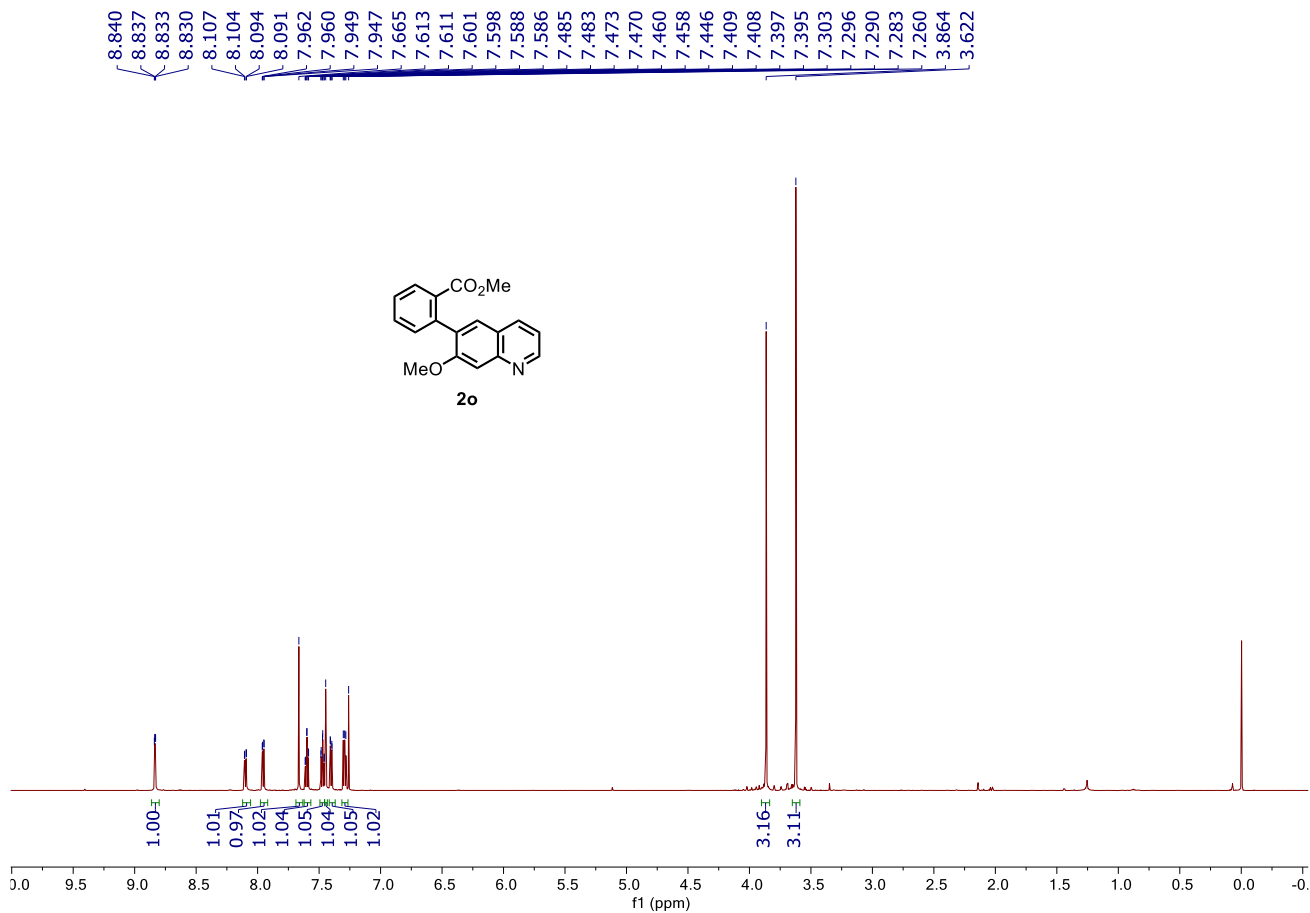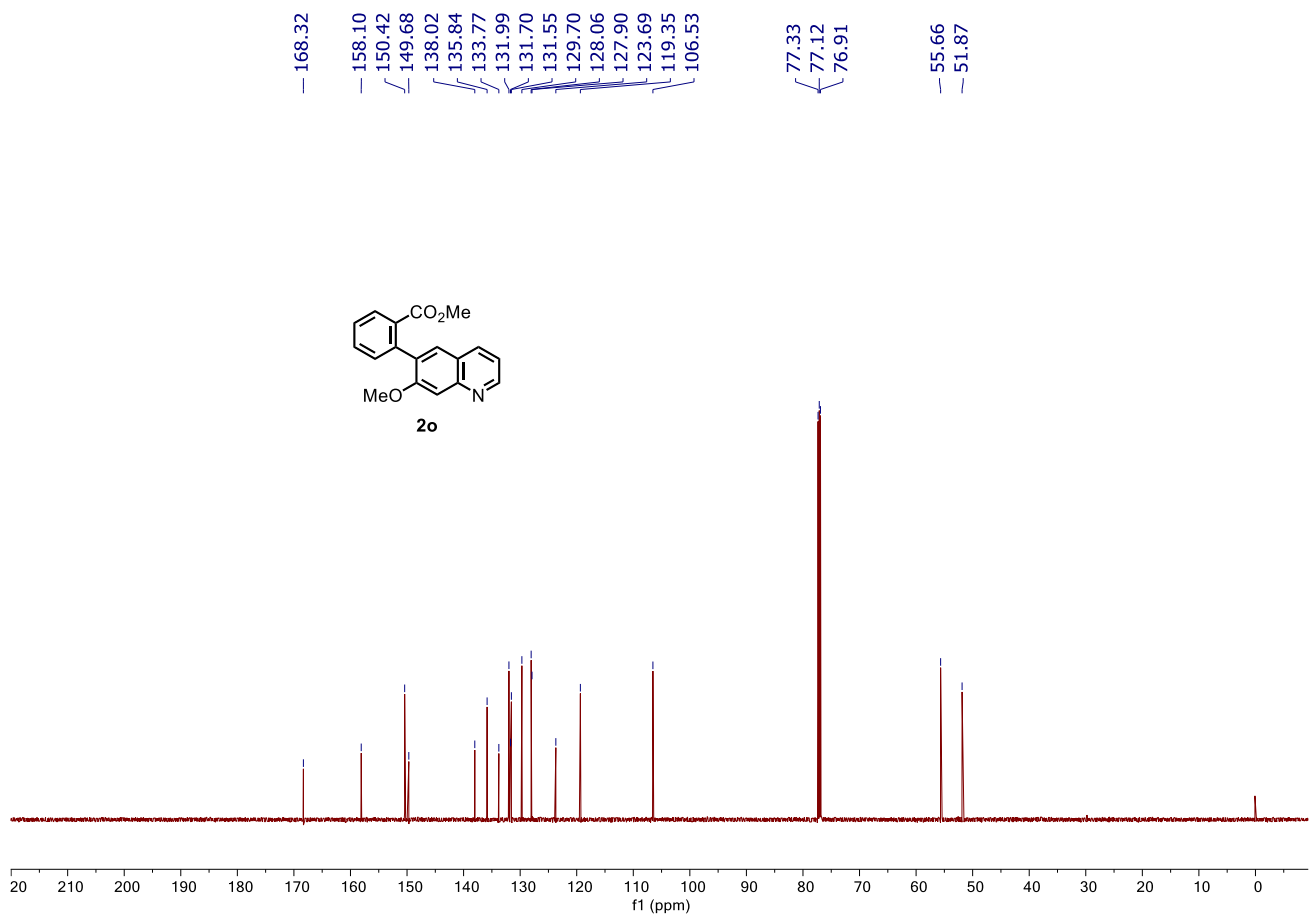



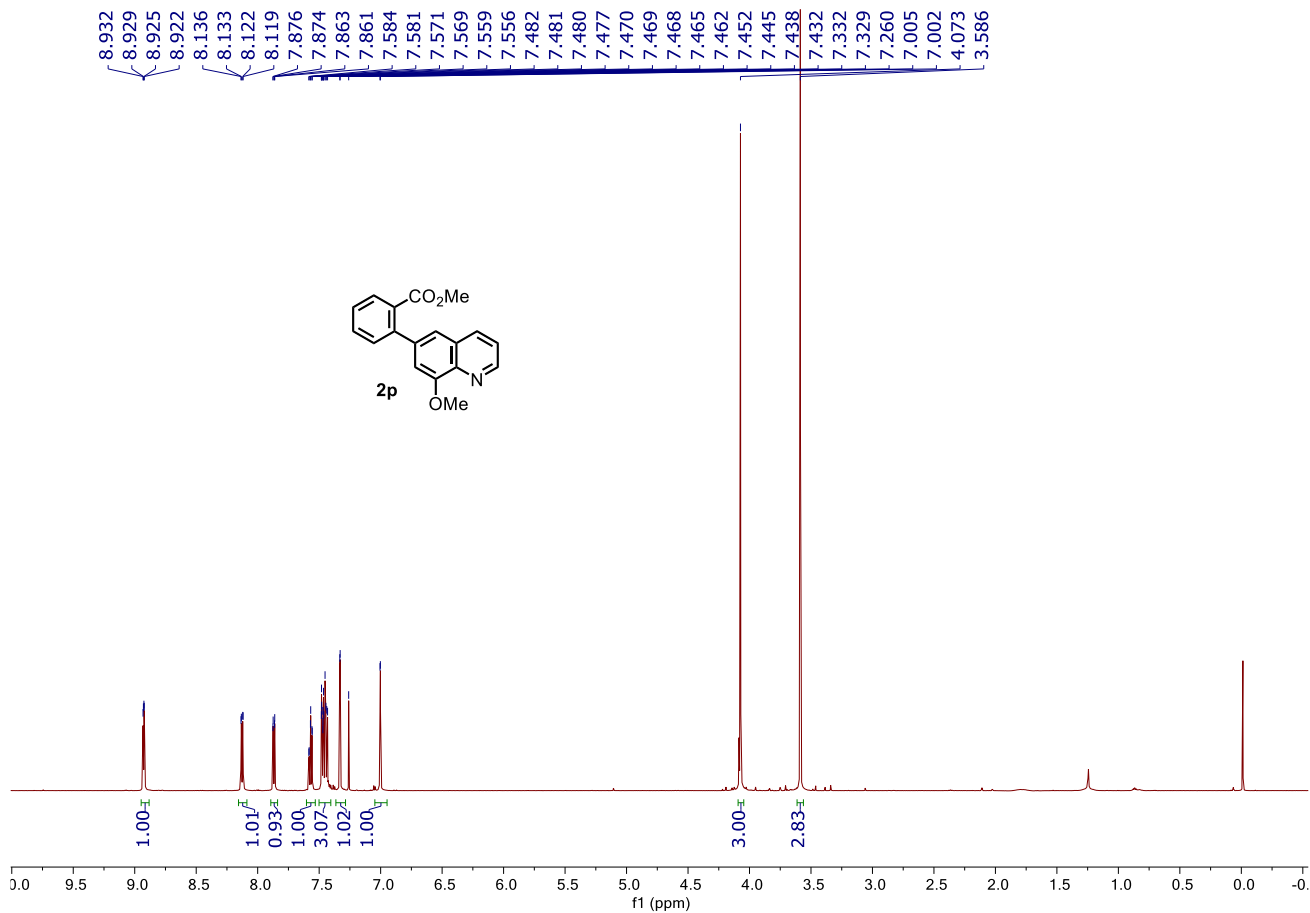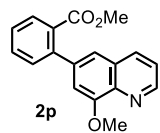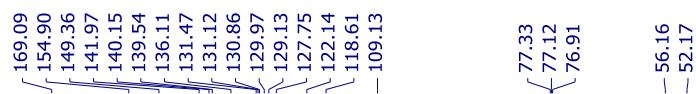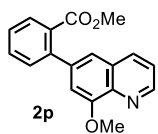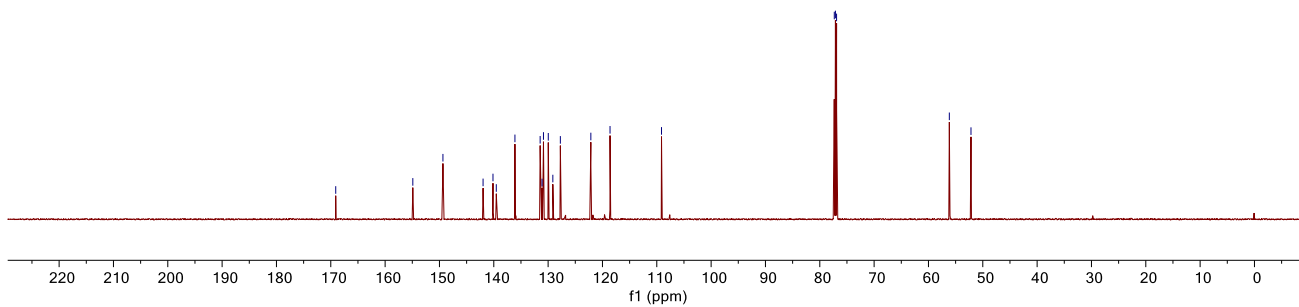

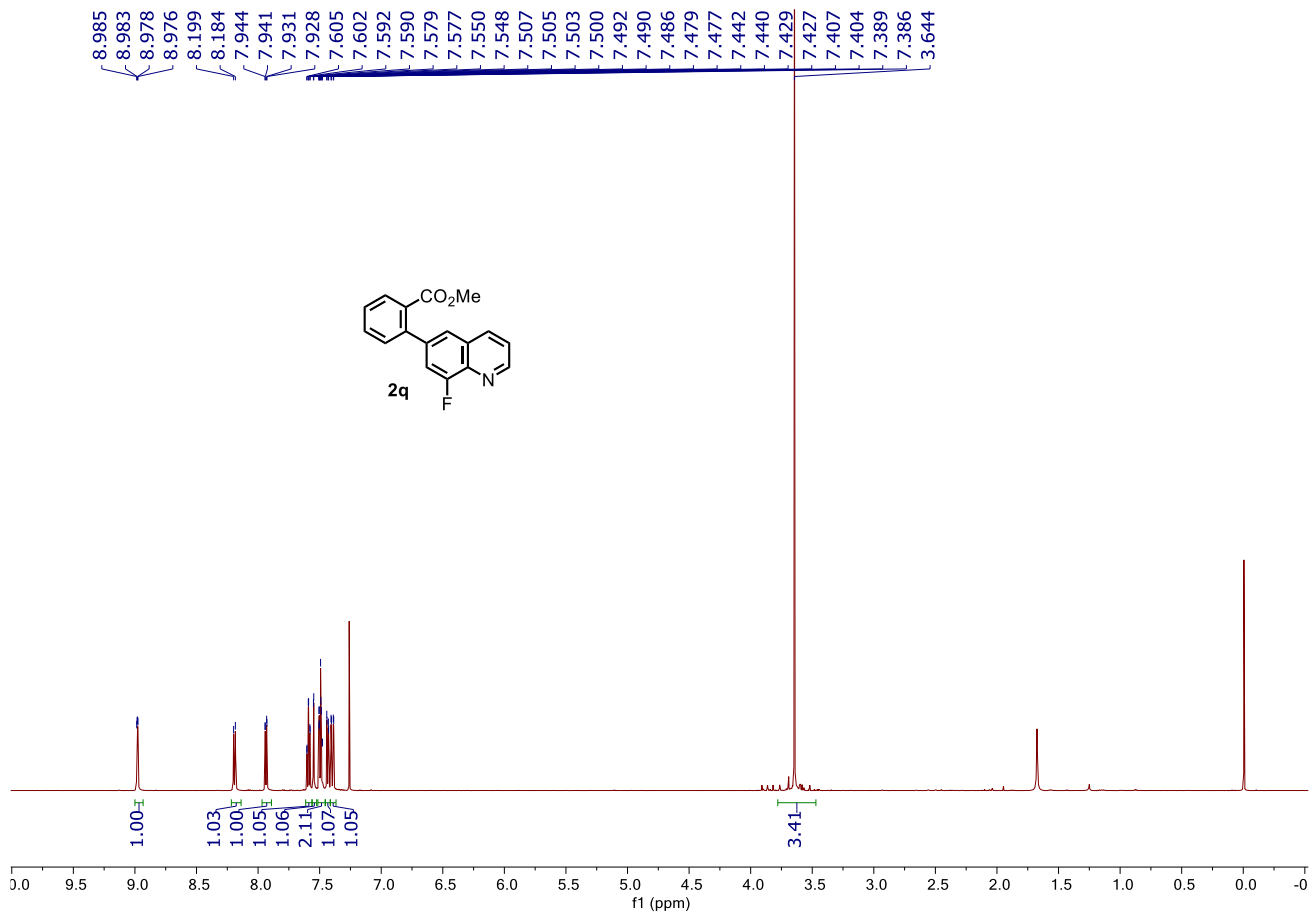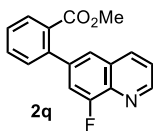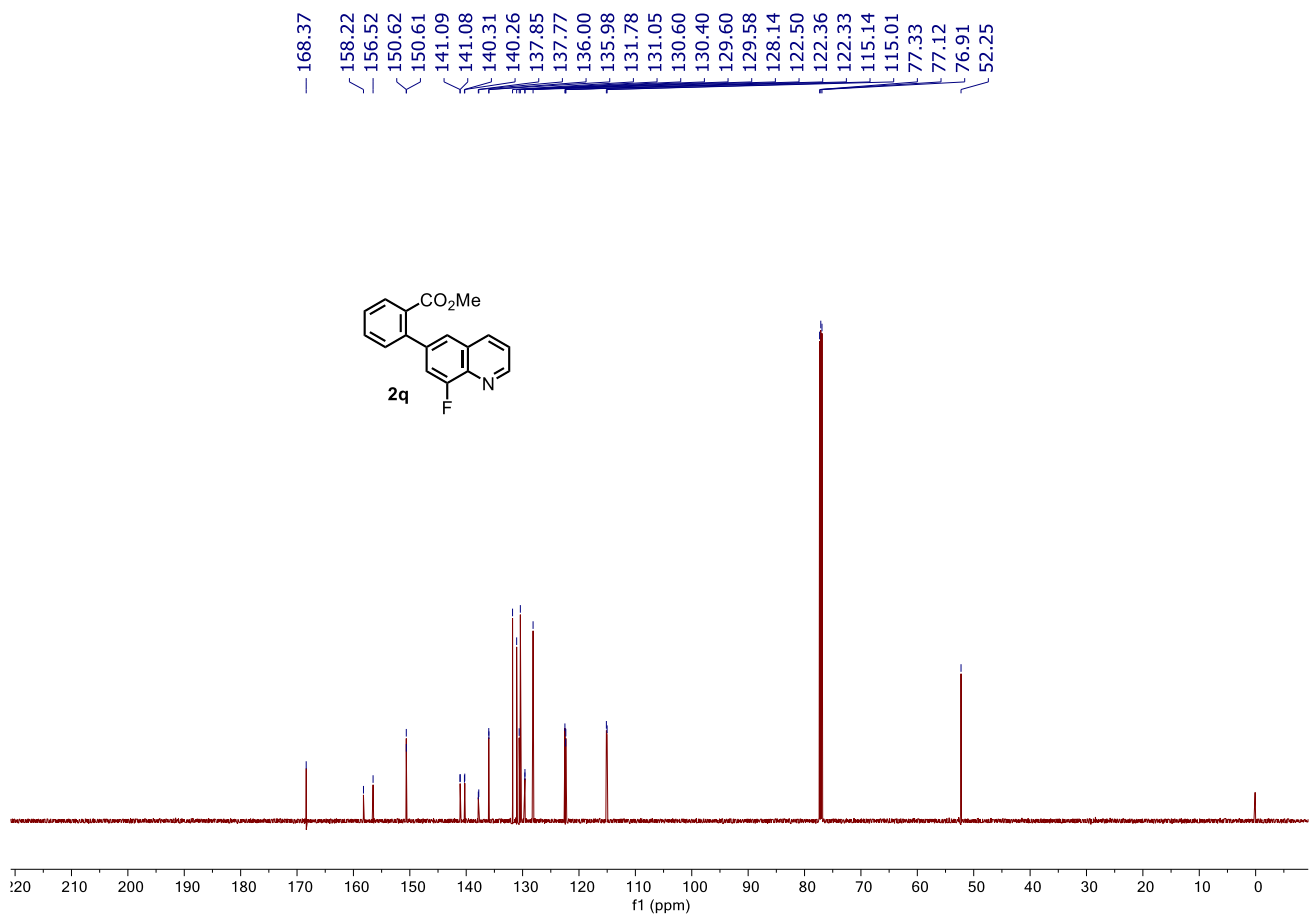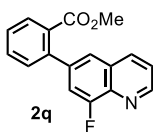

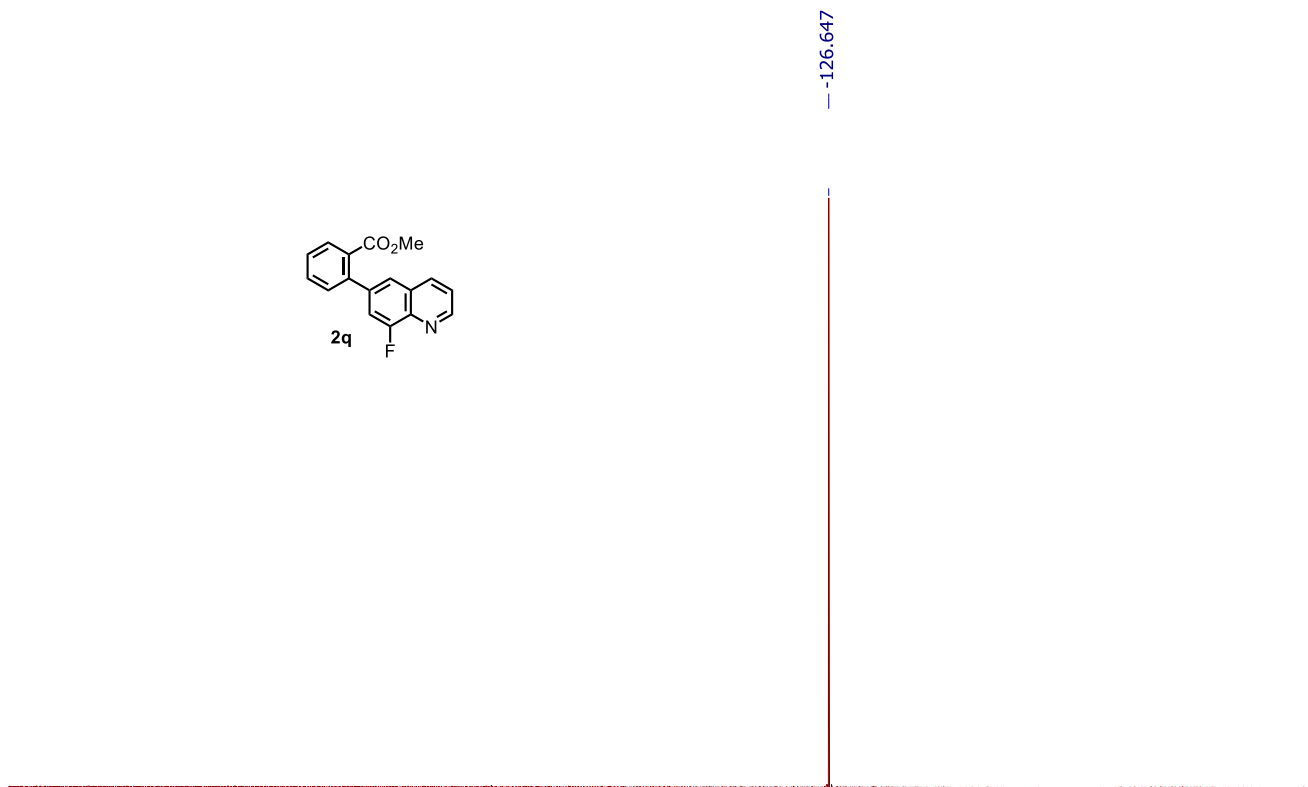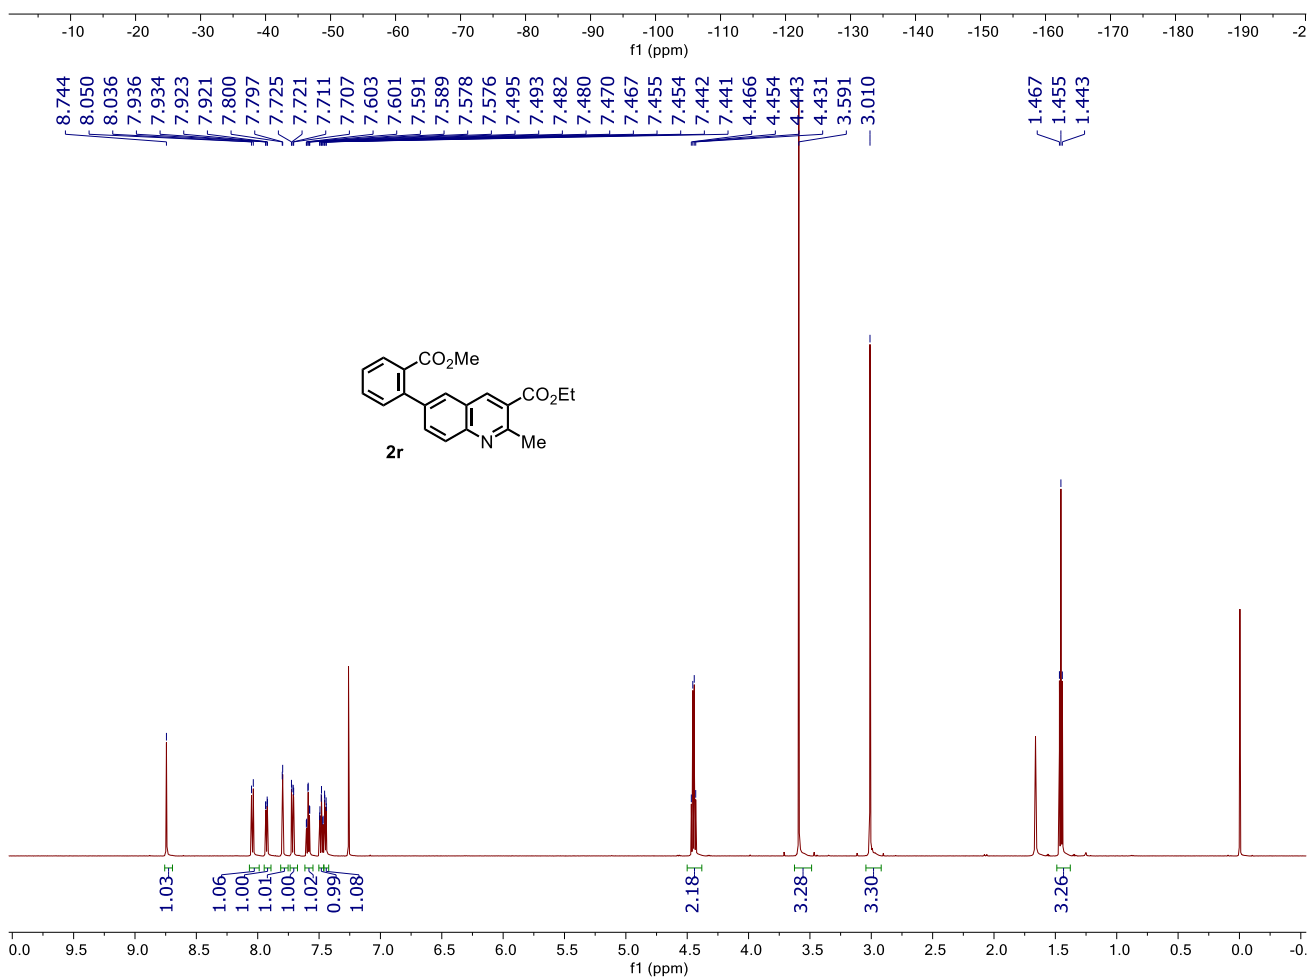

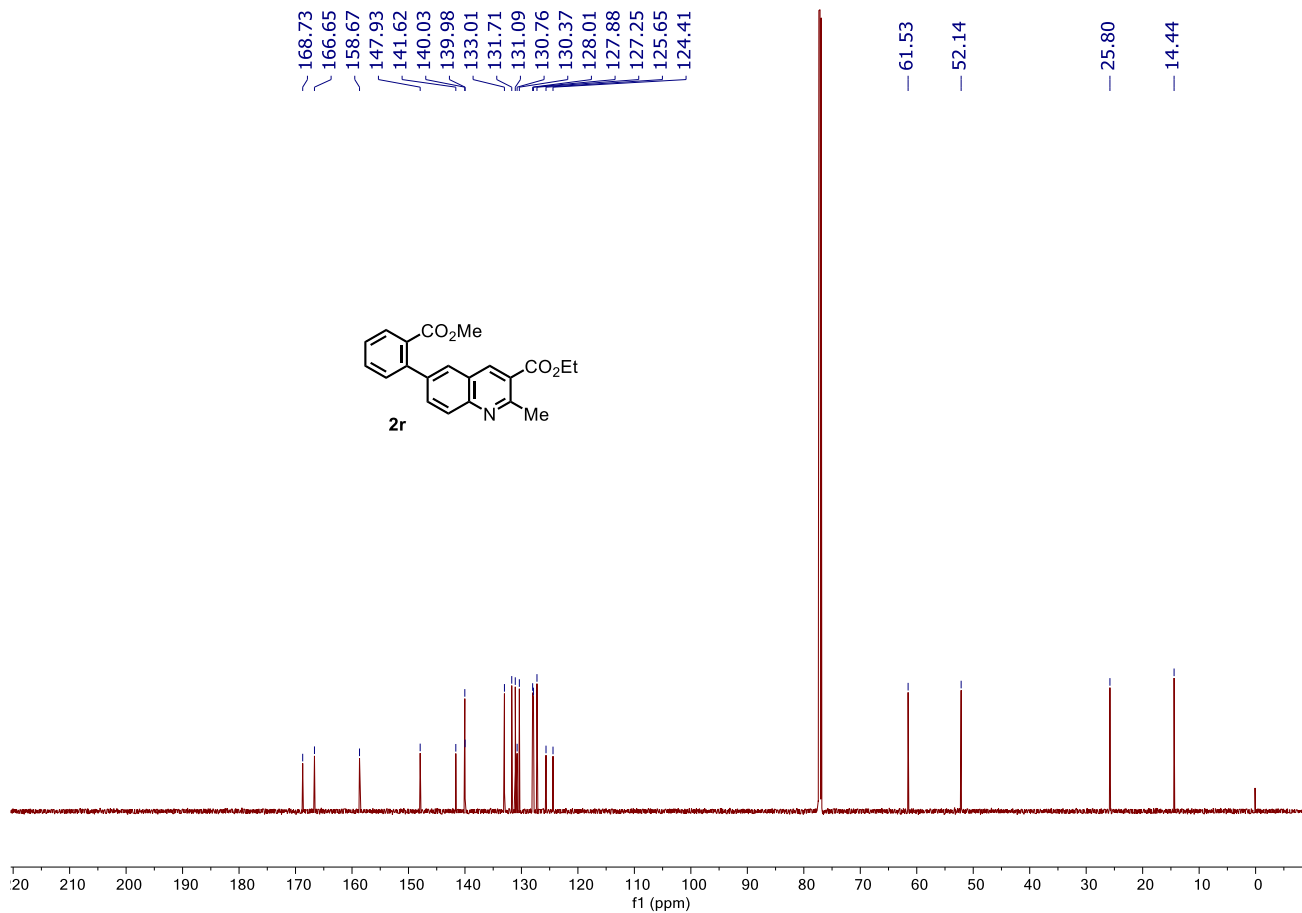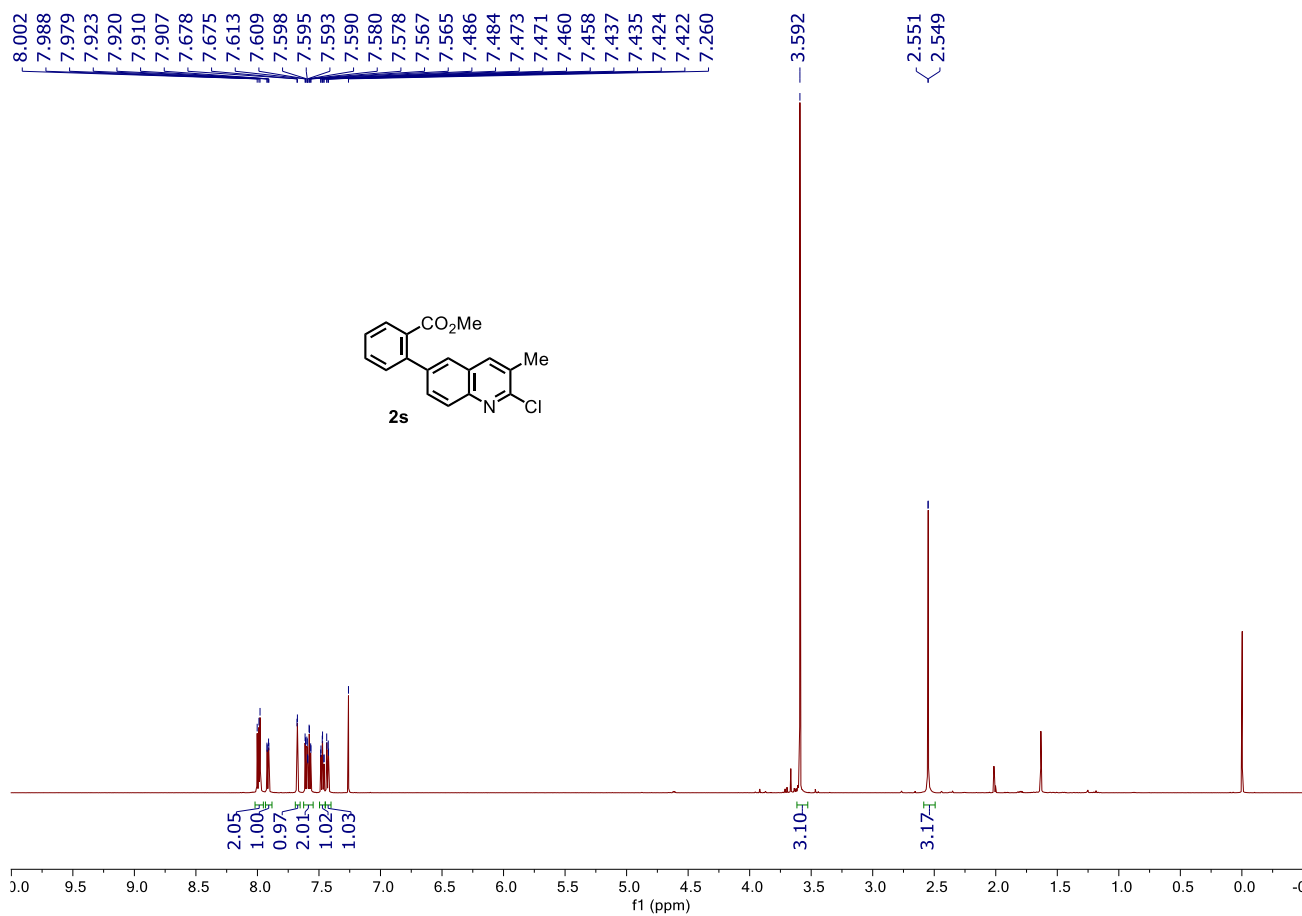

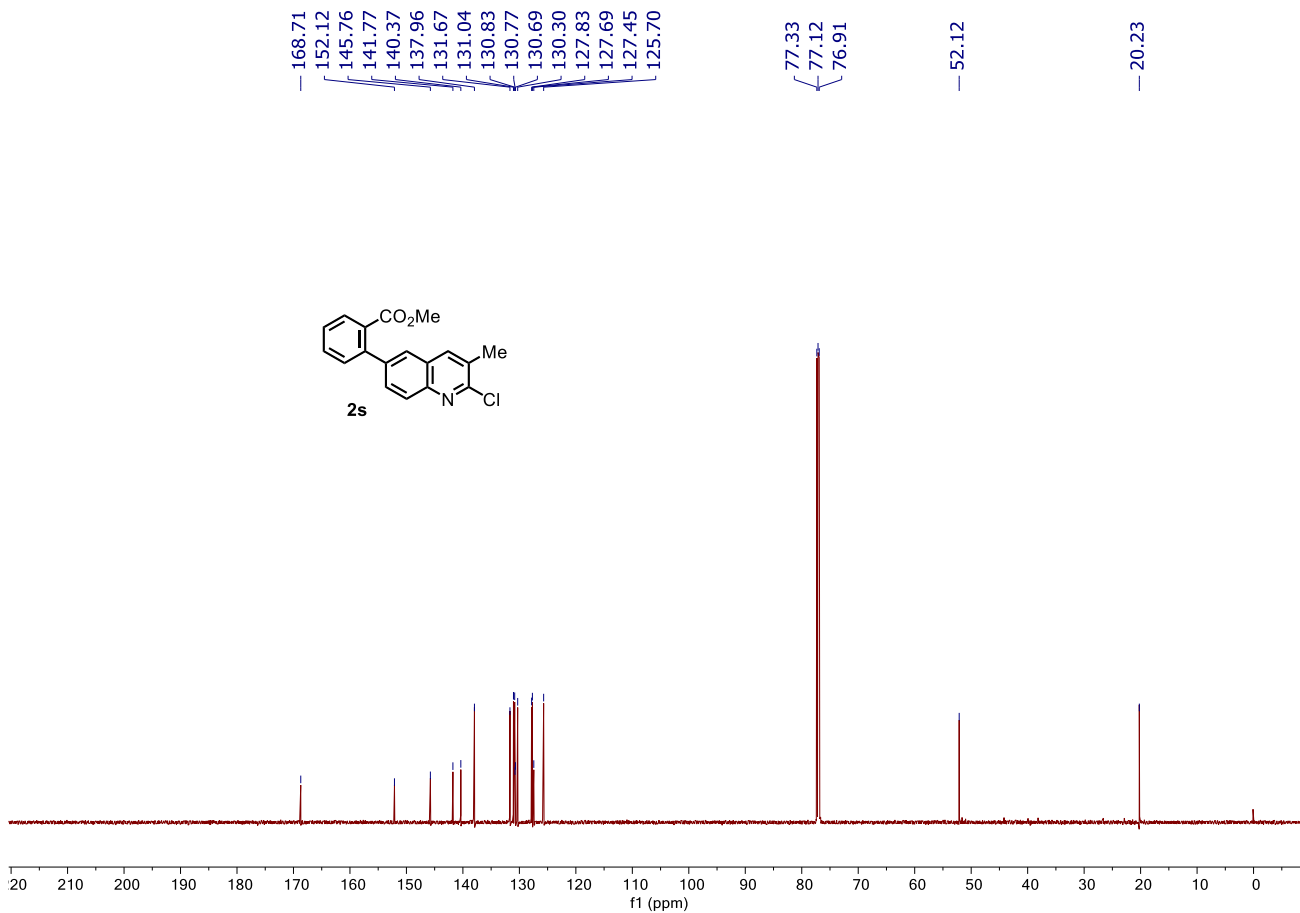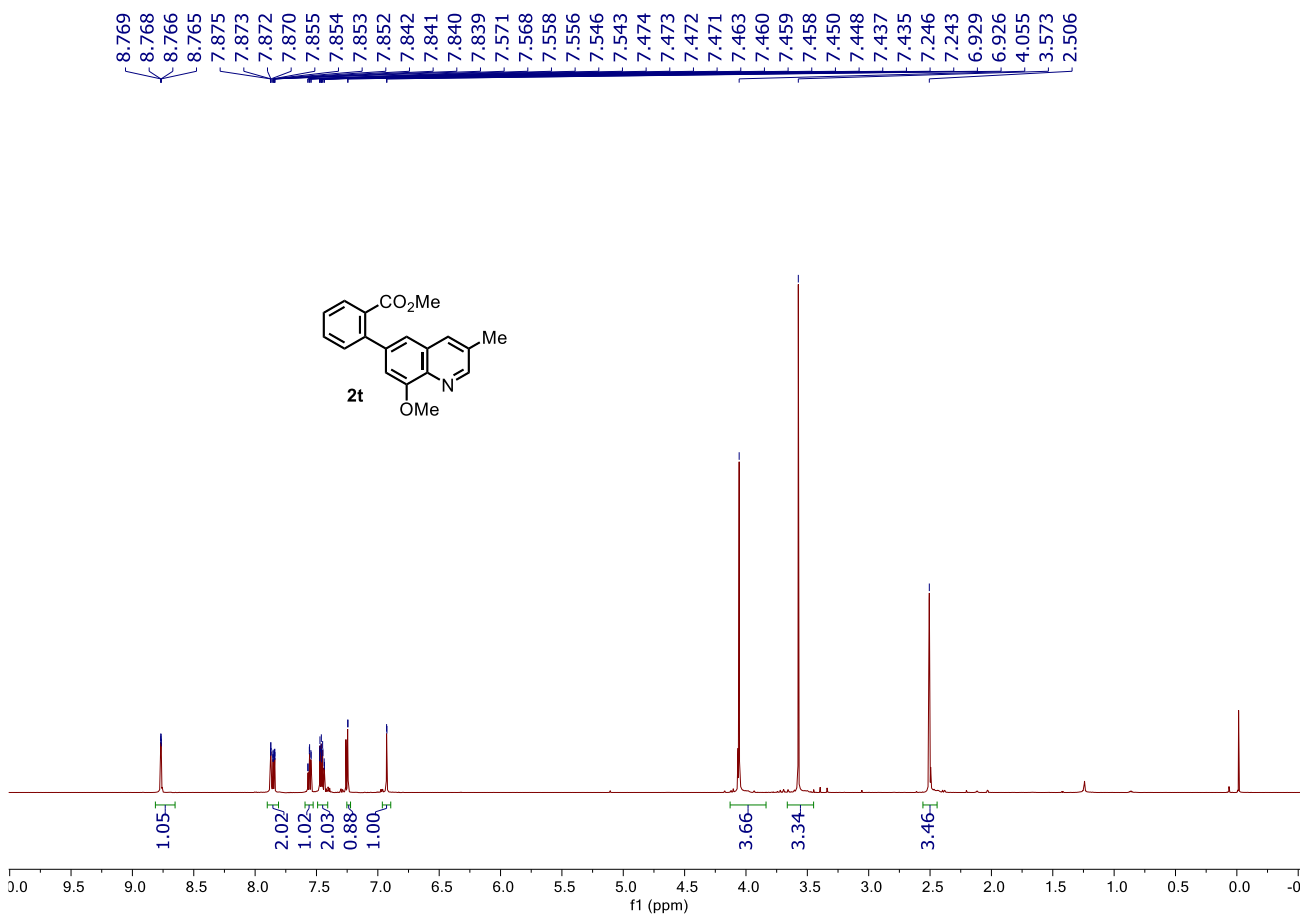

-169.20  
 -154.94  
 -151.21  
 -142.07  
 -140.10  
 -137.79  
 -134.84  
 -131.64  
 -131.39  
 -131.20  
 -130.78  
 -129.88  
 -129.04  
 -127.64  
 -118.10  
 -108.19  
 77.33  
 77.12  
 76.91  
 -56.08  
 -52.15  
 -18.78

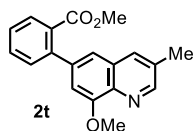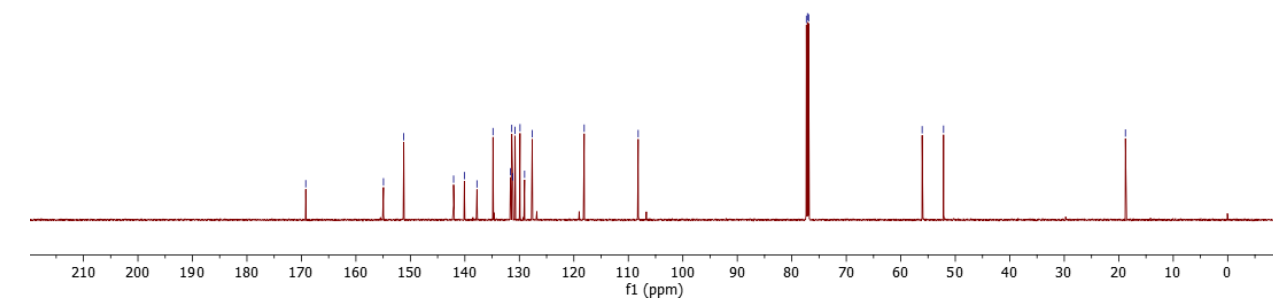

9.469  
 8.353  
 8.350  
 8.267  
 8.252  
 7.970  
 7.957  
 7.896  
 7.718  
 7.715  
 7.704  
 7.700  
 7.631  
 7.628  
 7.618  
 7.616  
 7.608  
 7.605  
 7.603  
 7.594  
 7.546  
 7.543  
 7.533  
 7.530  
 7.516  
 7.513  
 7.503  
 7.501  
 7.490  
 7.488  
 7.347  
 7.344  
 7.333  
 7.329  
 7.260  
 3.627  
 -2.561

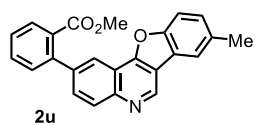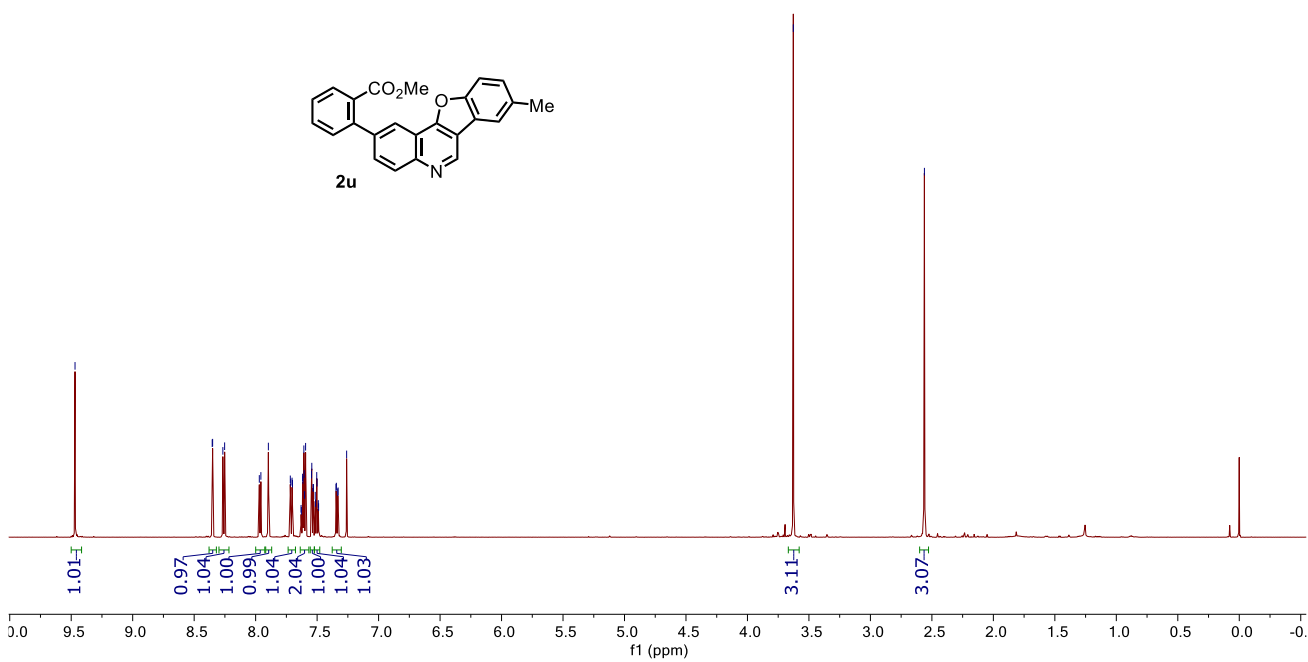

1.01  
 0.97  
 1.04  
 1.00  
 0.99  
 1.04  
 2.04  
 1.00  
 1.04  
 1.03

3.11  
 3.07

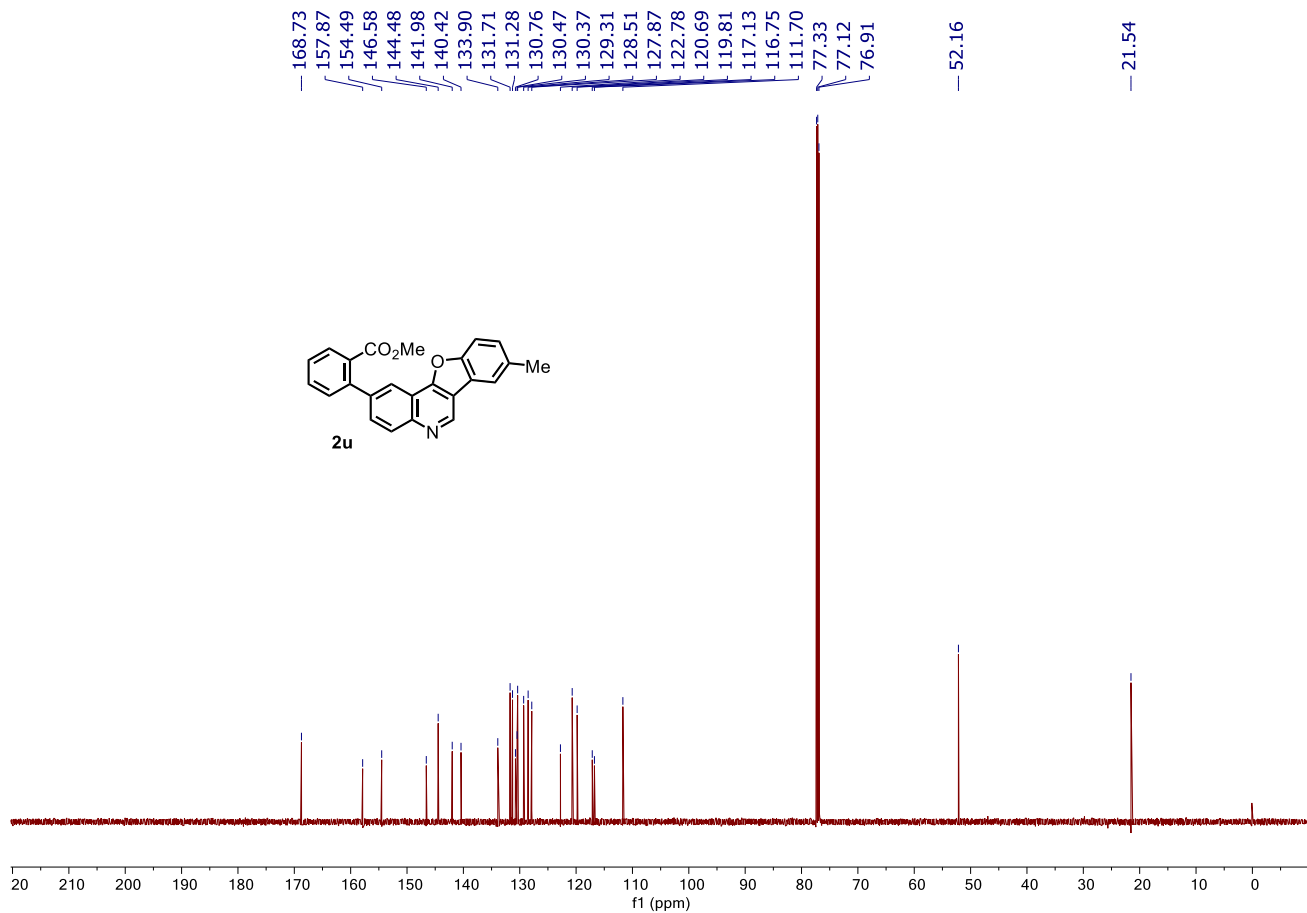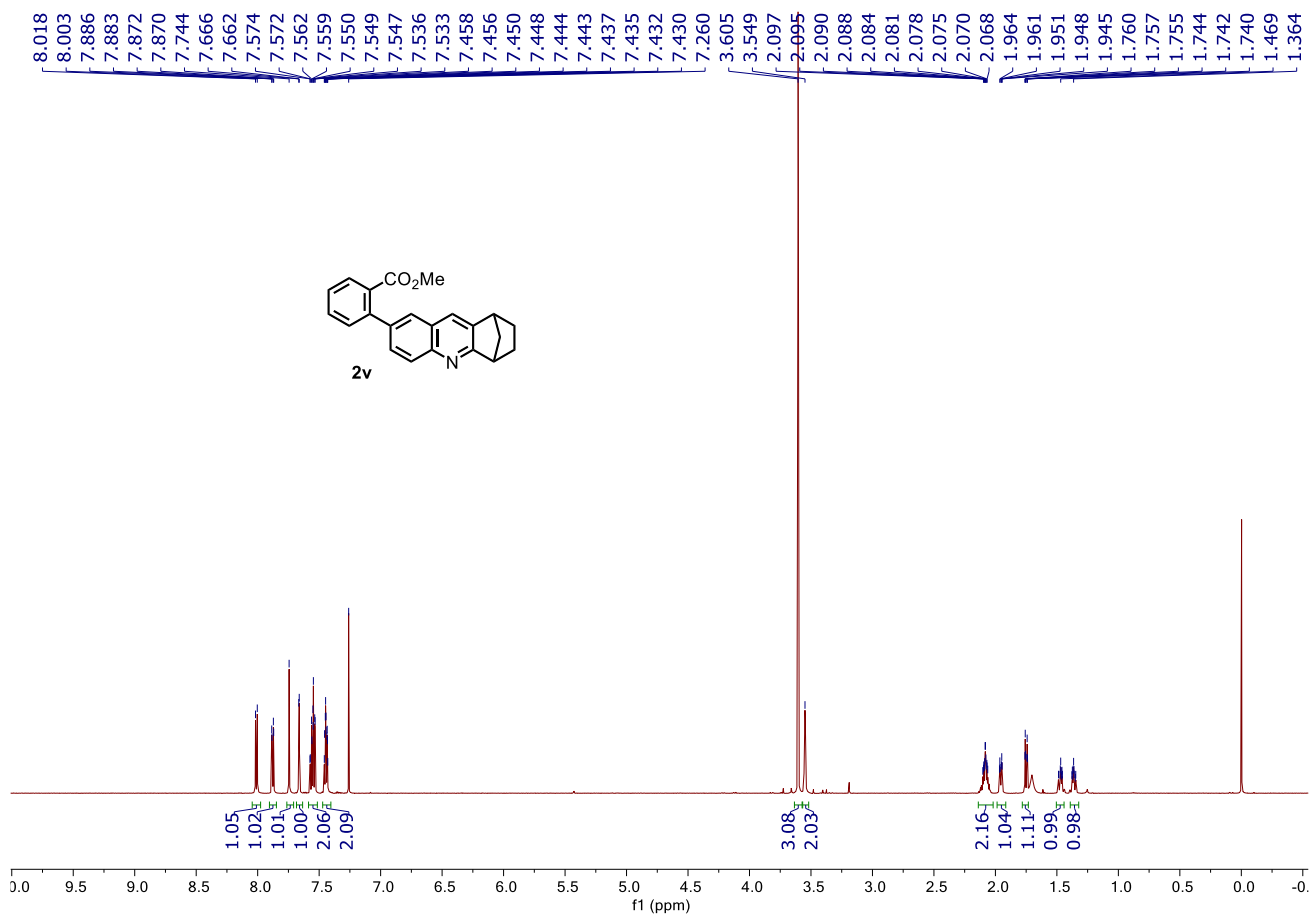

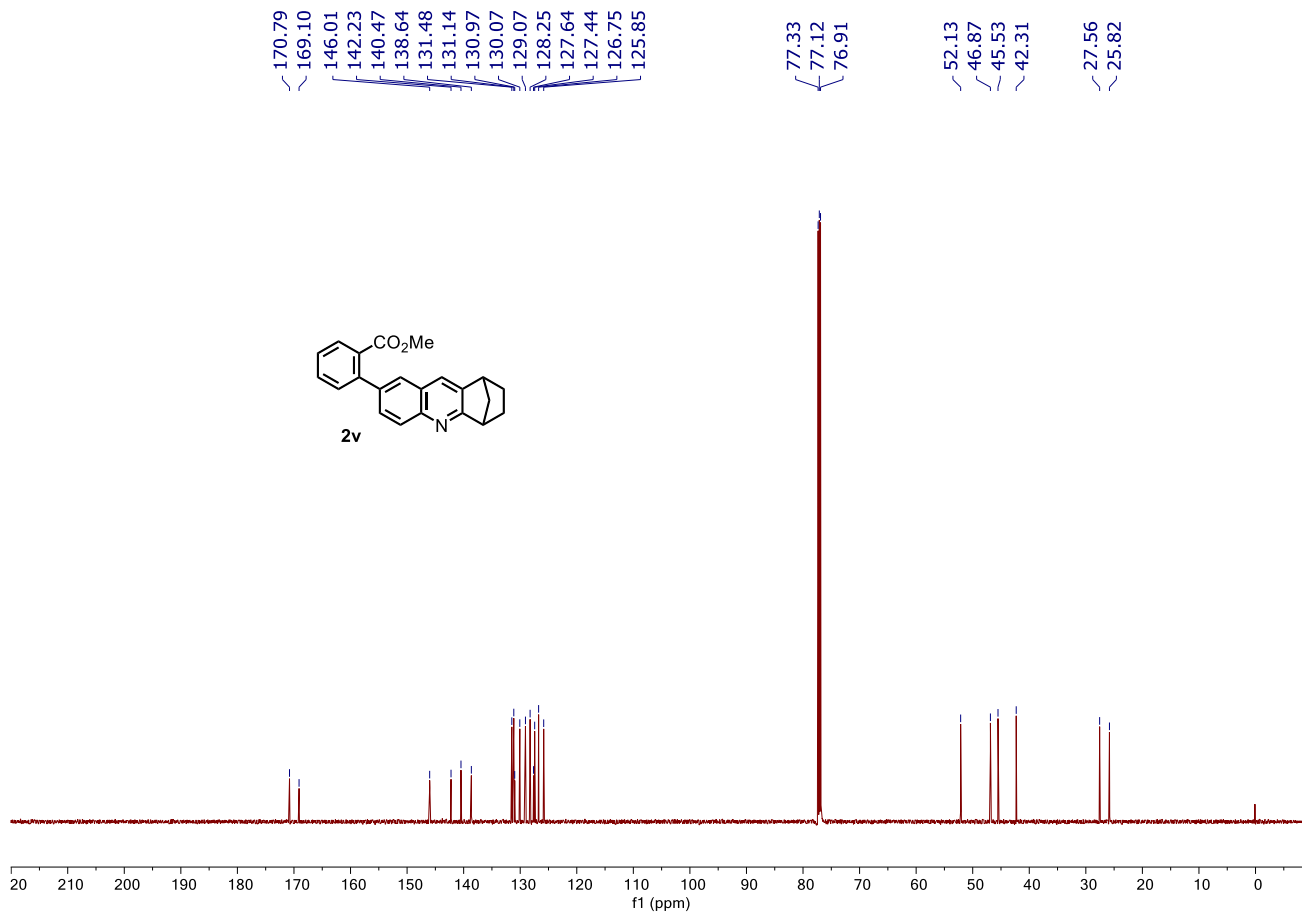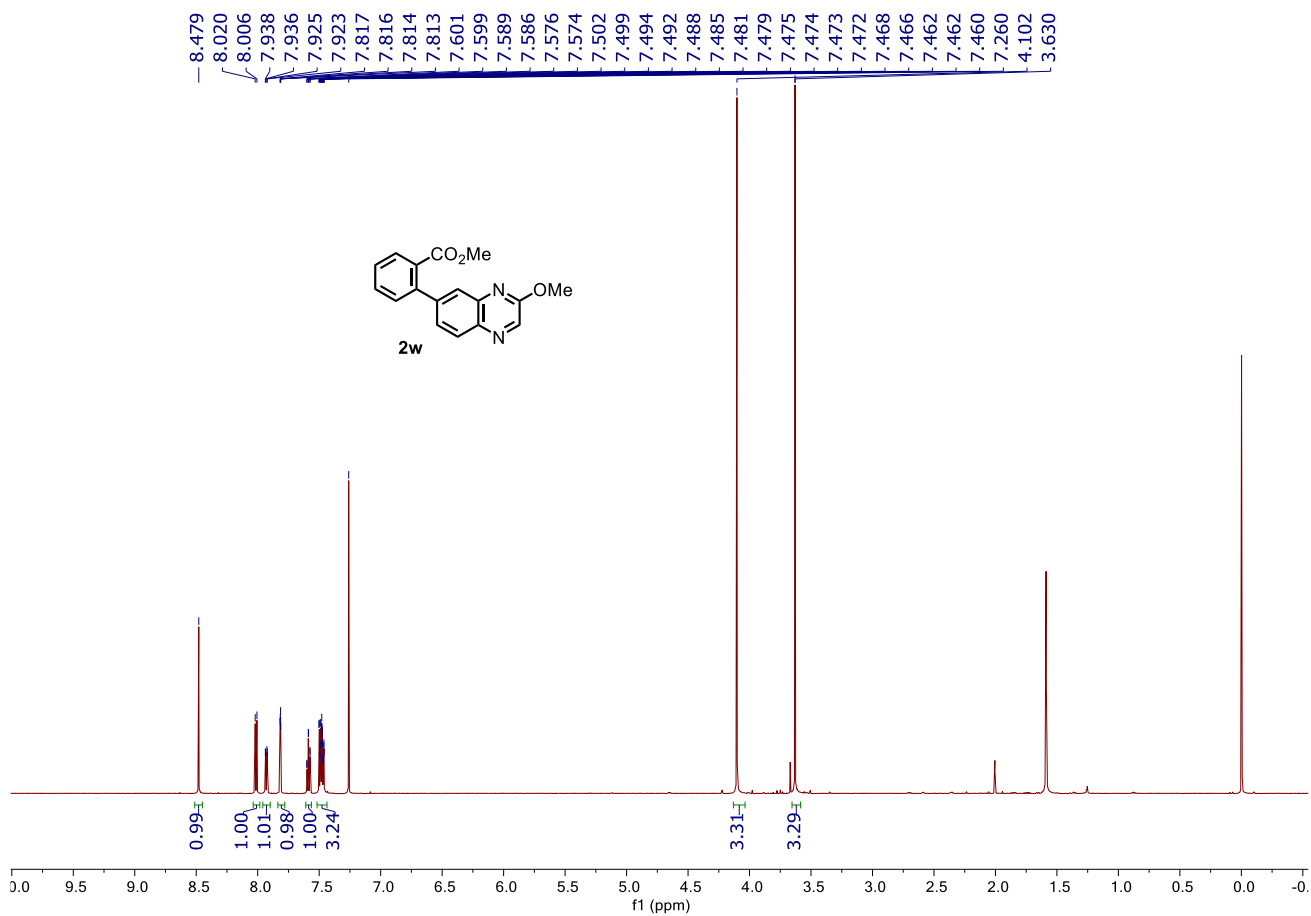



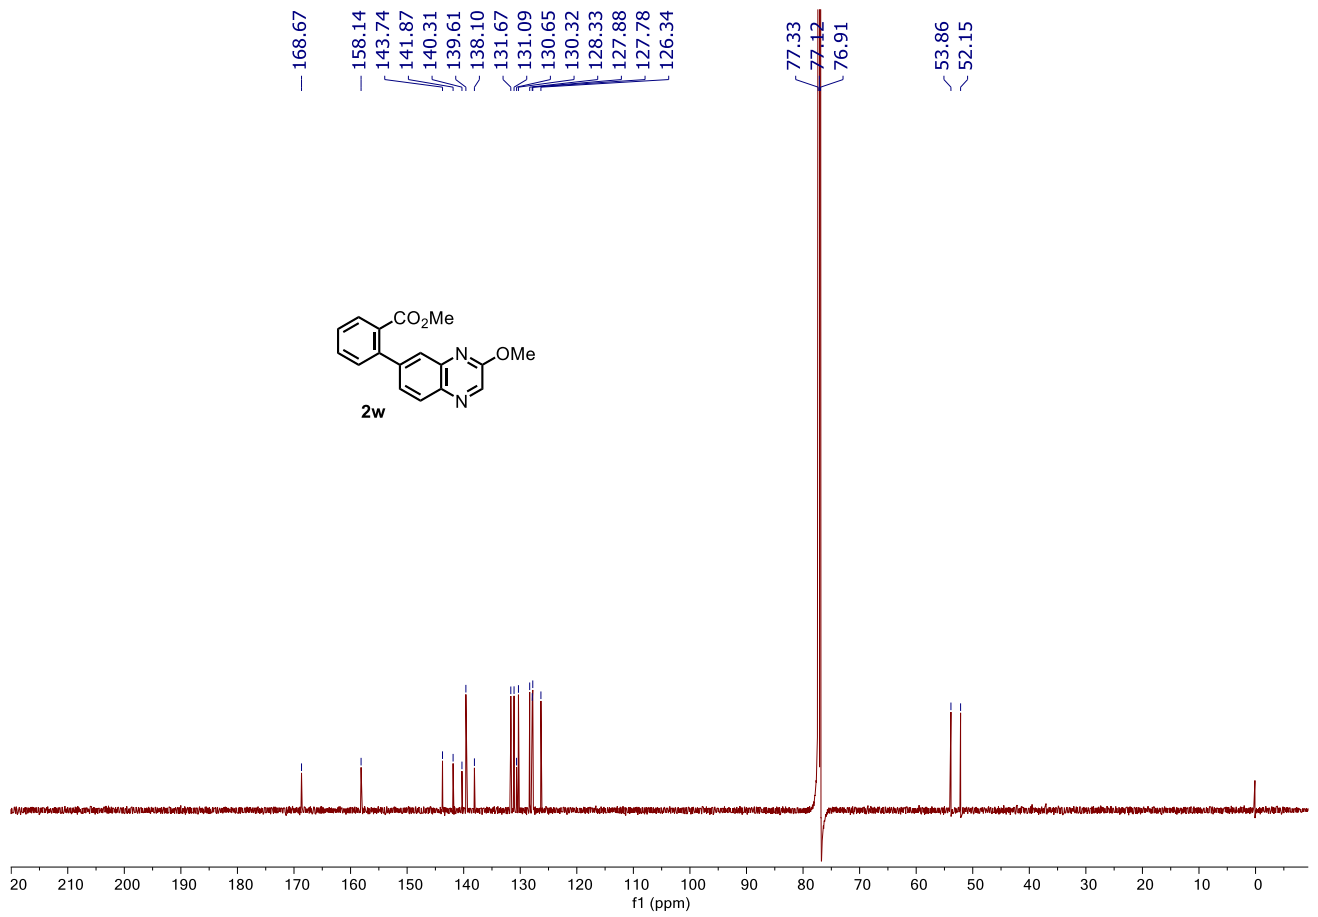

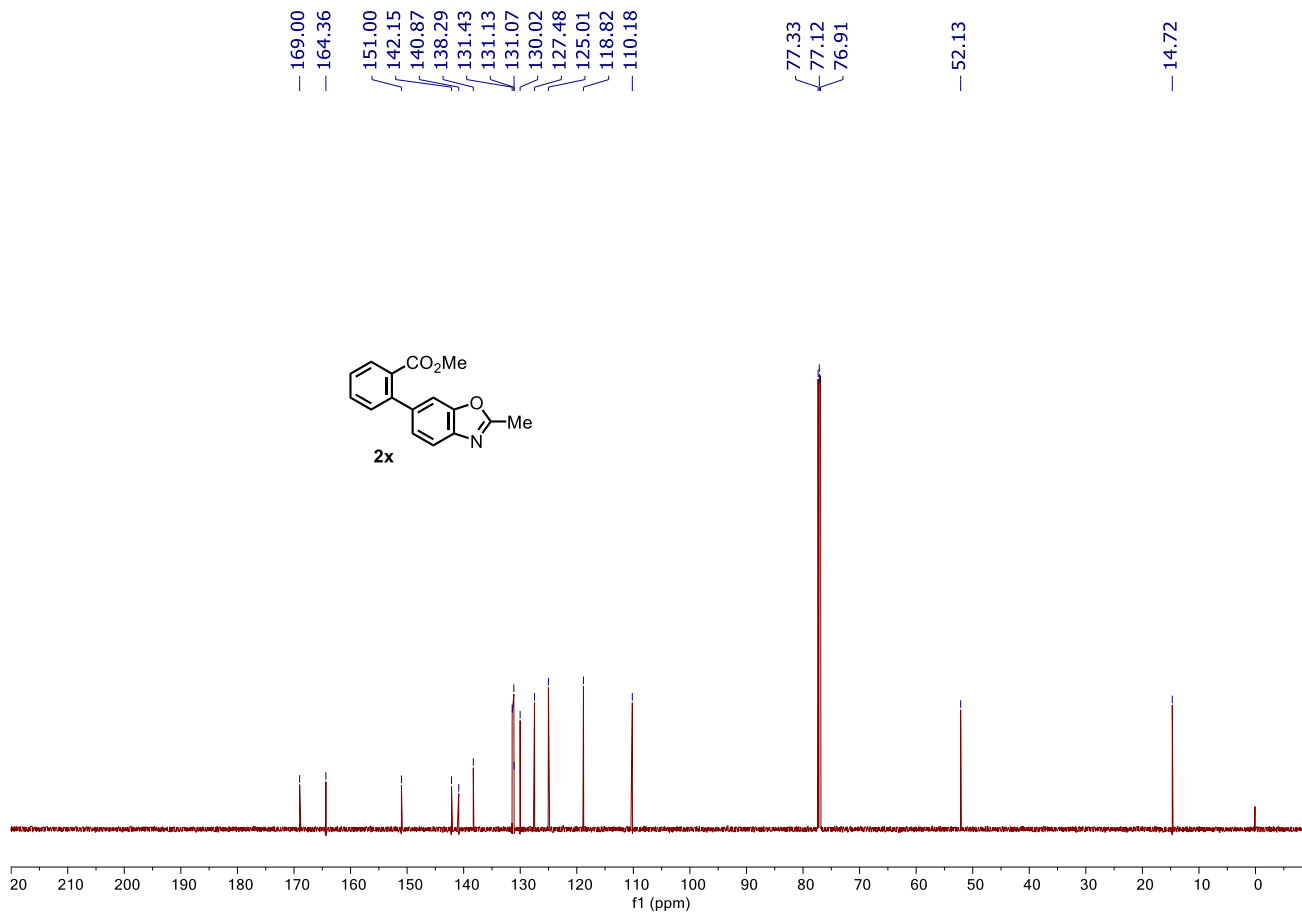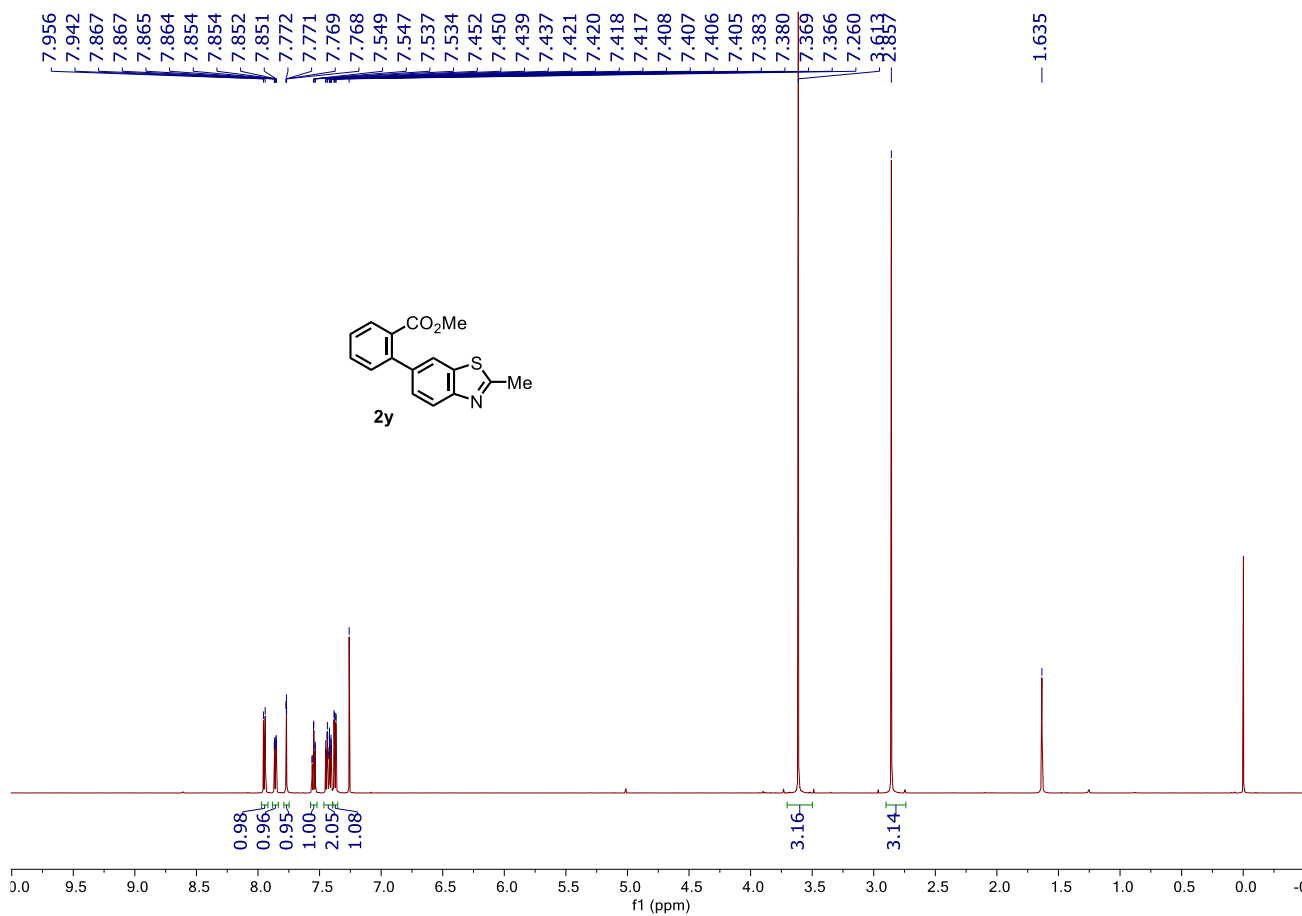

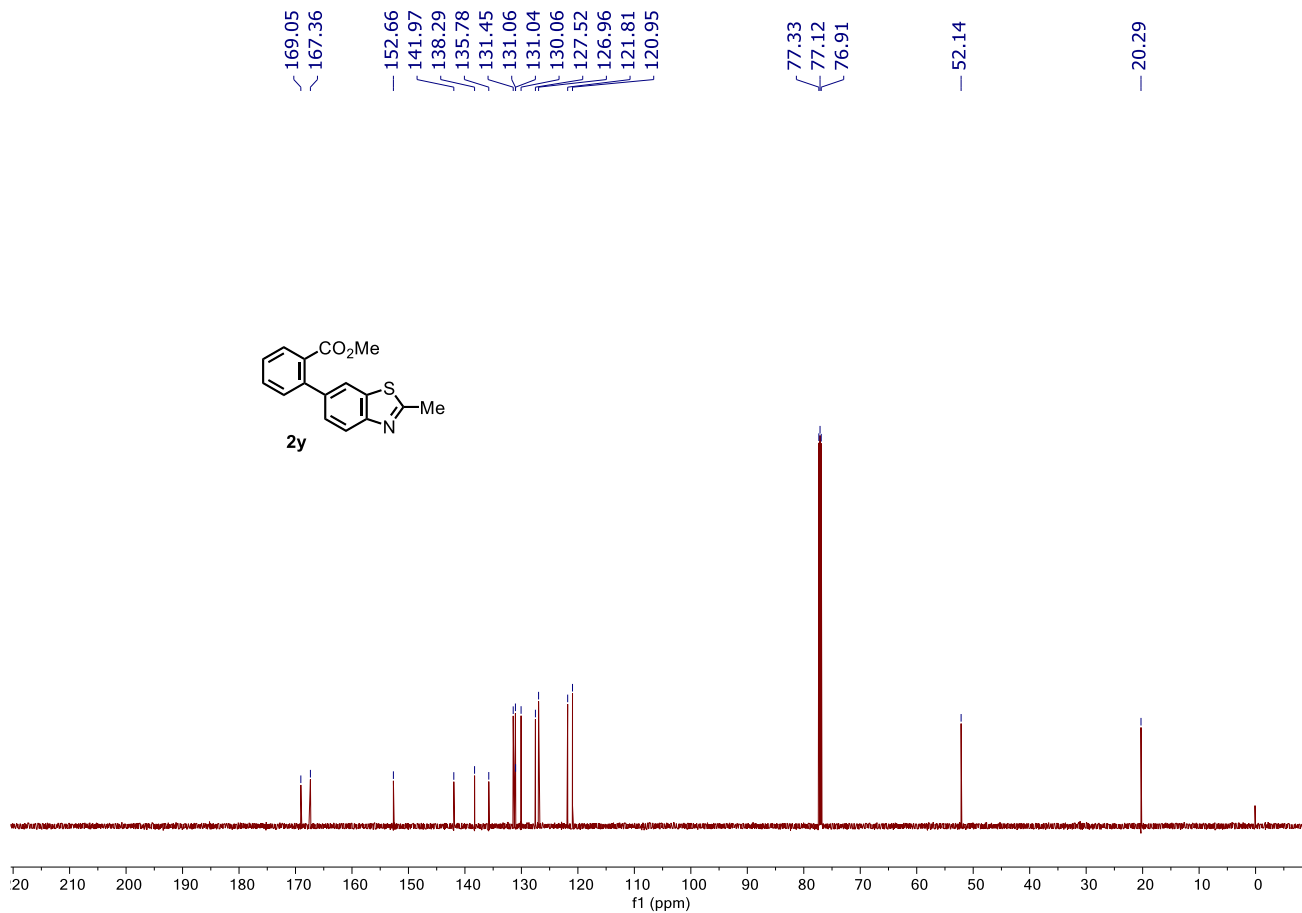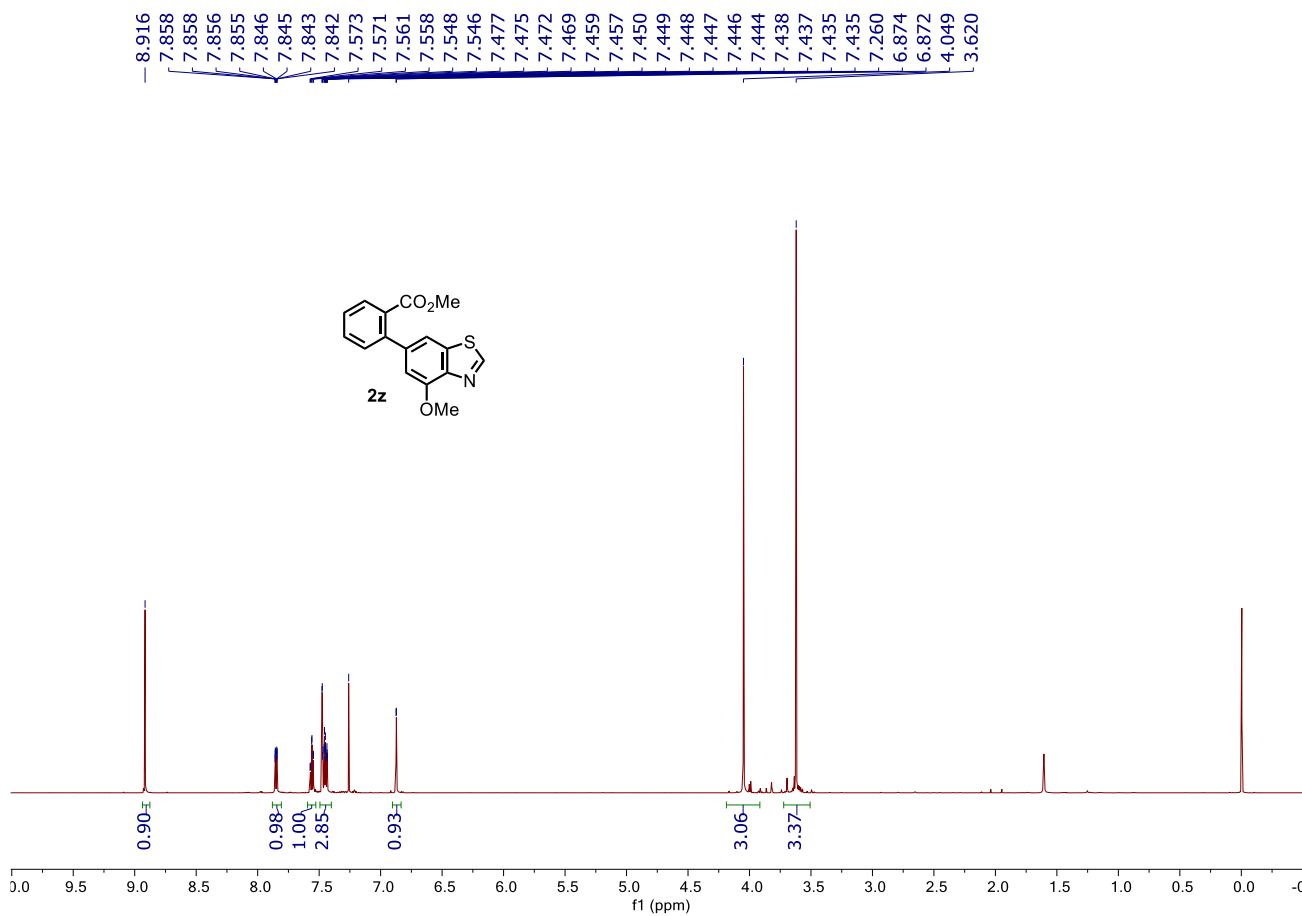

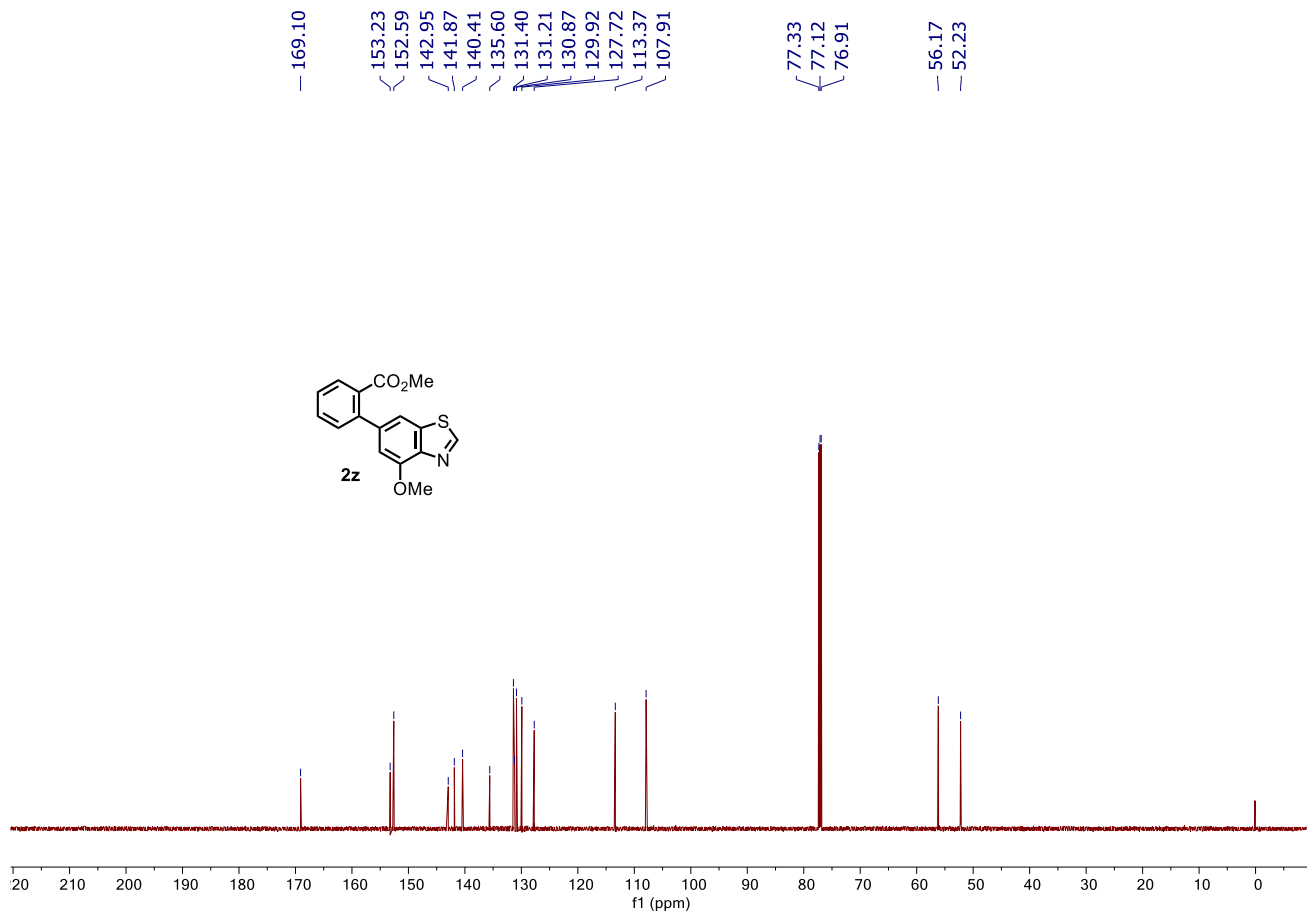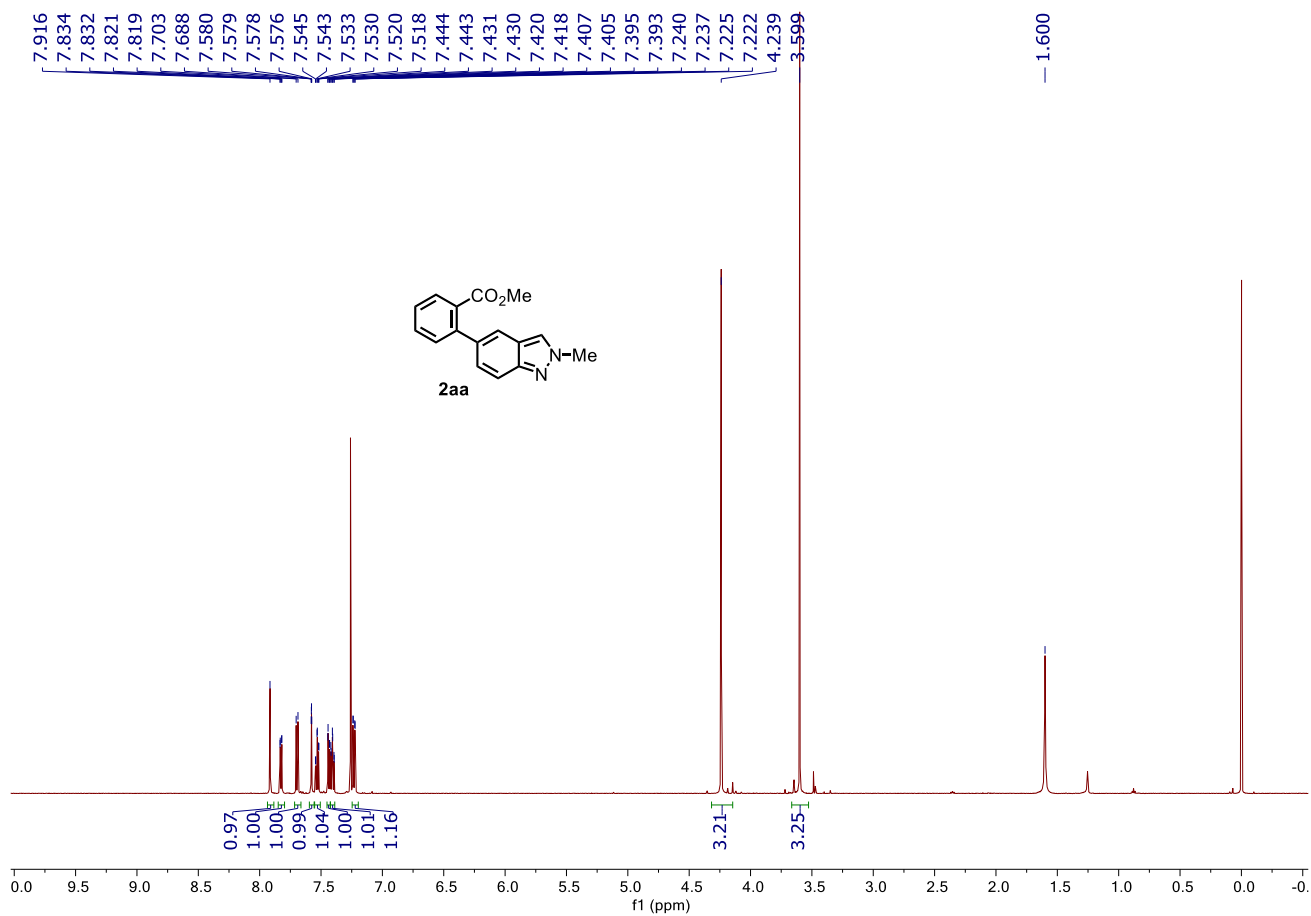

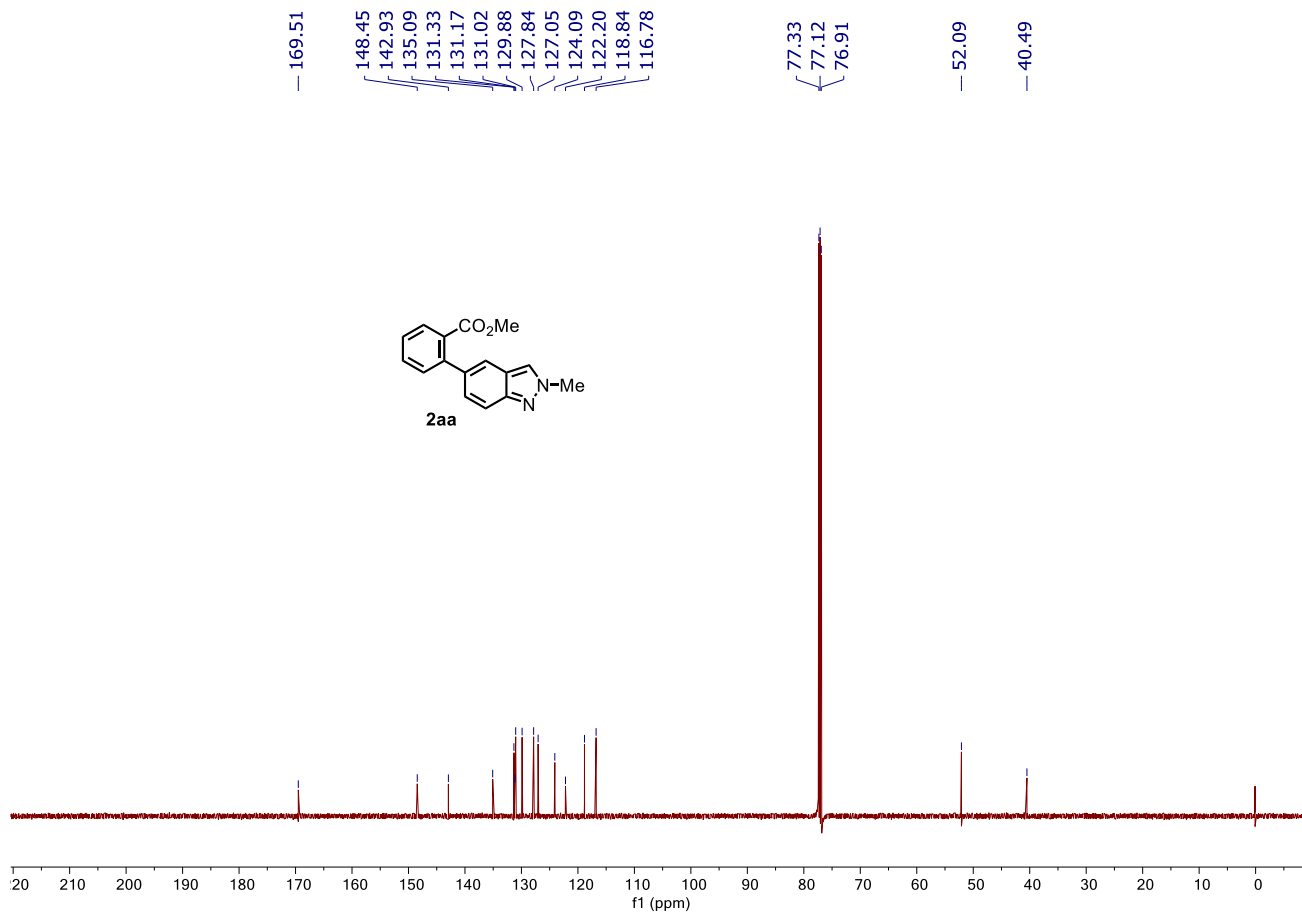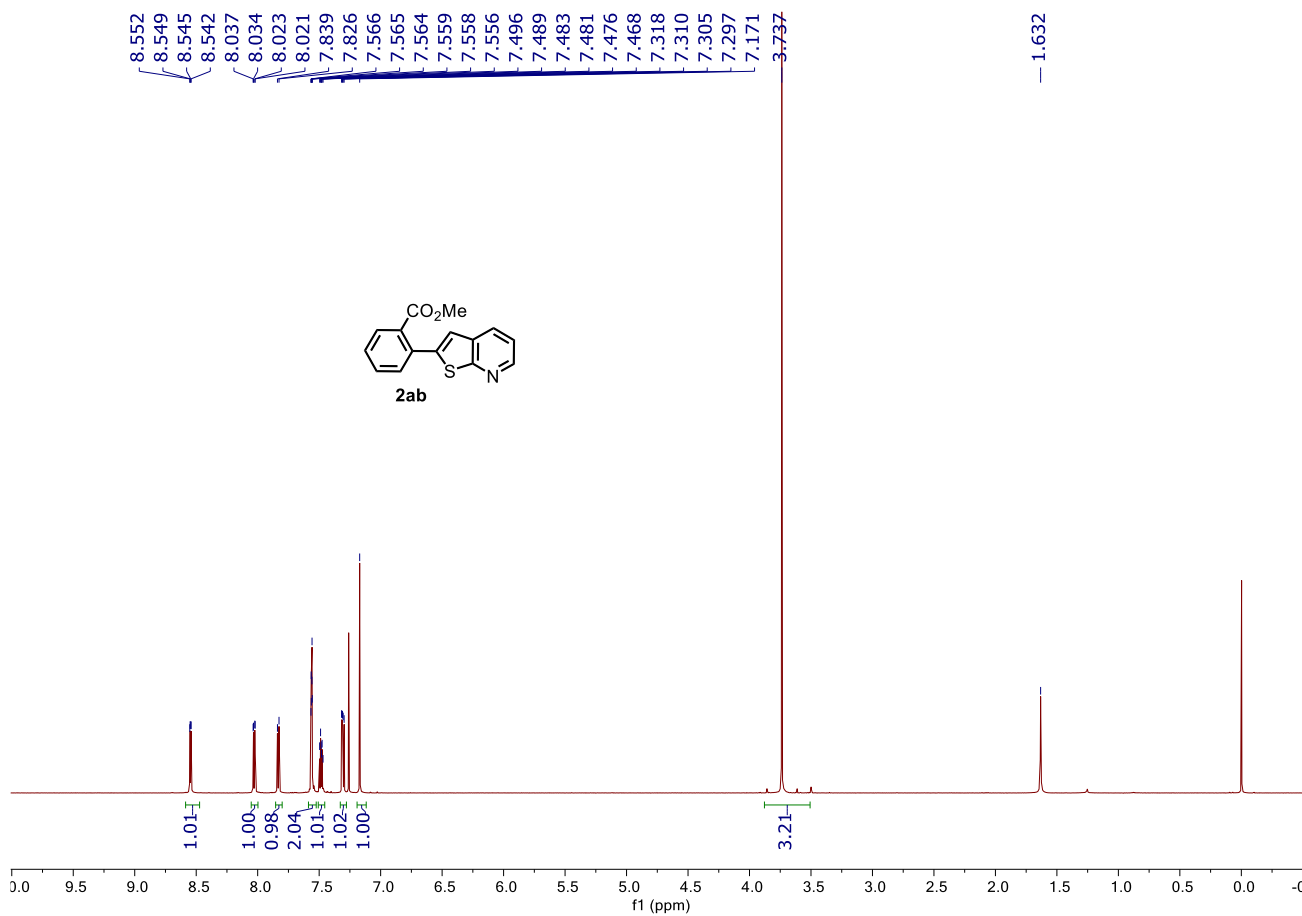

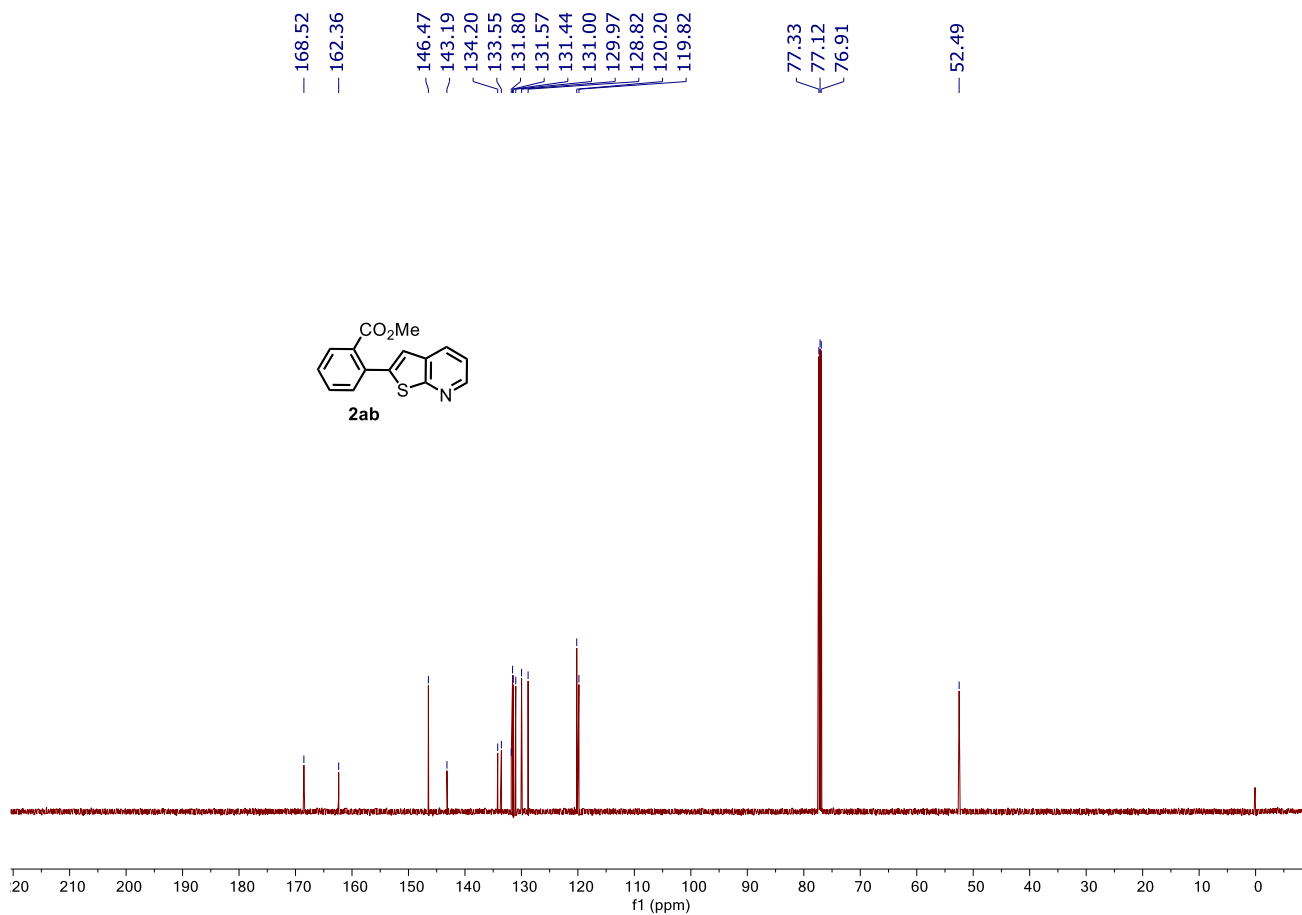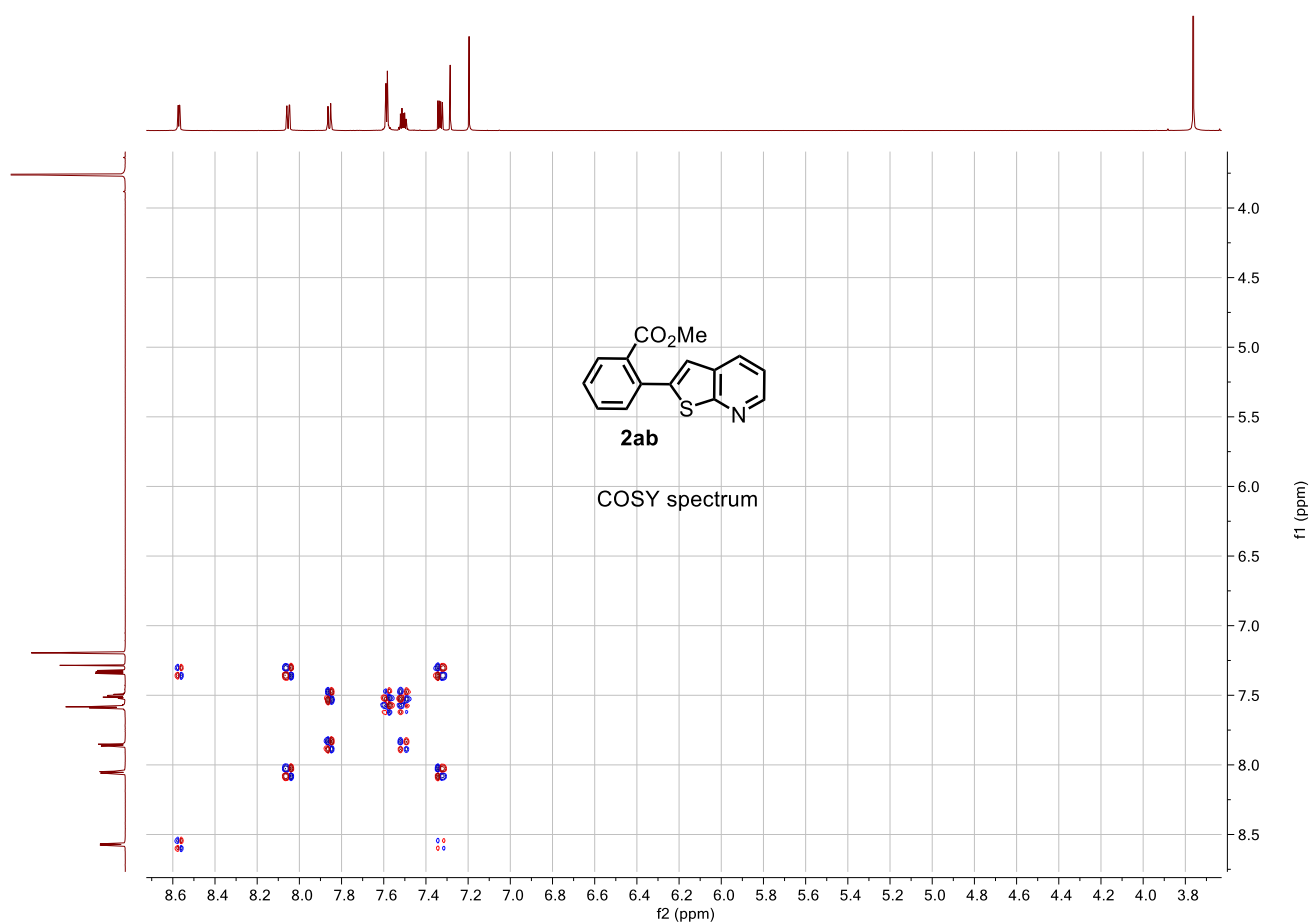

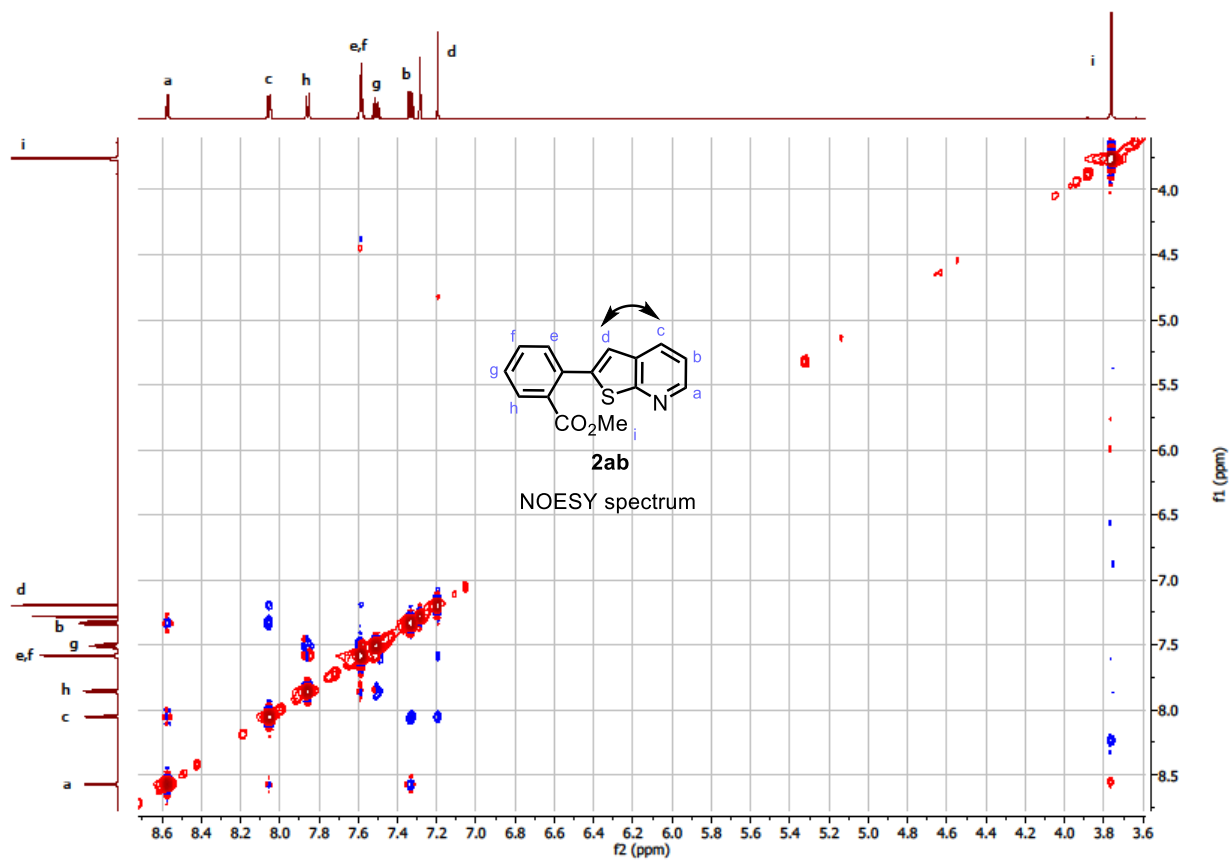

- 8.383
- 8.242
- 8.228
- 7.978
- 7.977
- 7.965
- 7.964
- 7.856
- 7.852
- 7.769
- 7.766
- 7.755
- 7.752
- 7.708
- 7.620
- 7.618
- 7.607
- 7.605
- 7.524
- 7.513
- 7.511
- 7.479
- 7.477
- 7.466
- 7.464
- 7.260
- 5.769
- 5.742
- 5.331
- 5.313
- 5.311
- 5.308
- 5.304
- 3.680
- 1.947
- 1.936
- 1.924
- 1.914
- 1.911
- 1.902
- 1.890
- 1.878
- 1.866
- 1.065
- 1.053
- 1.040

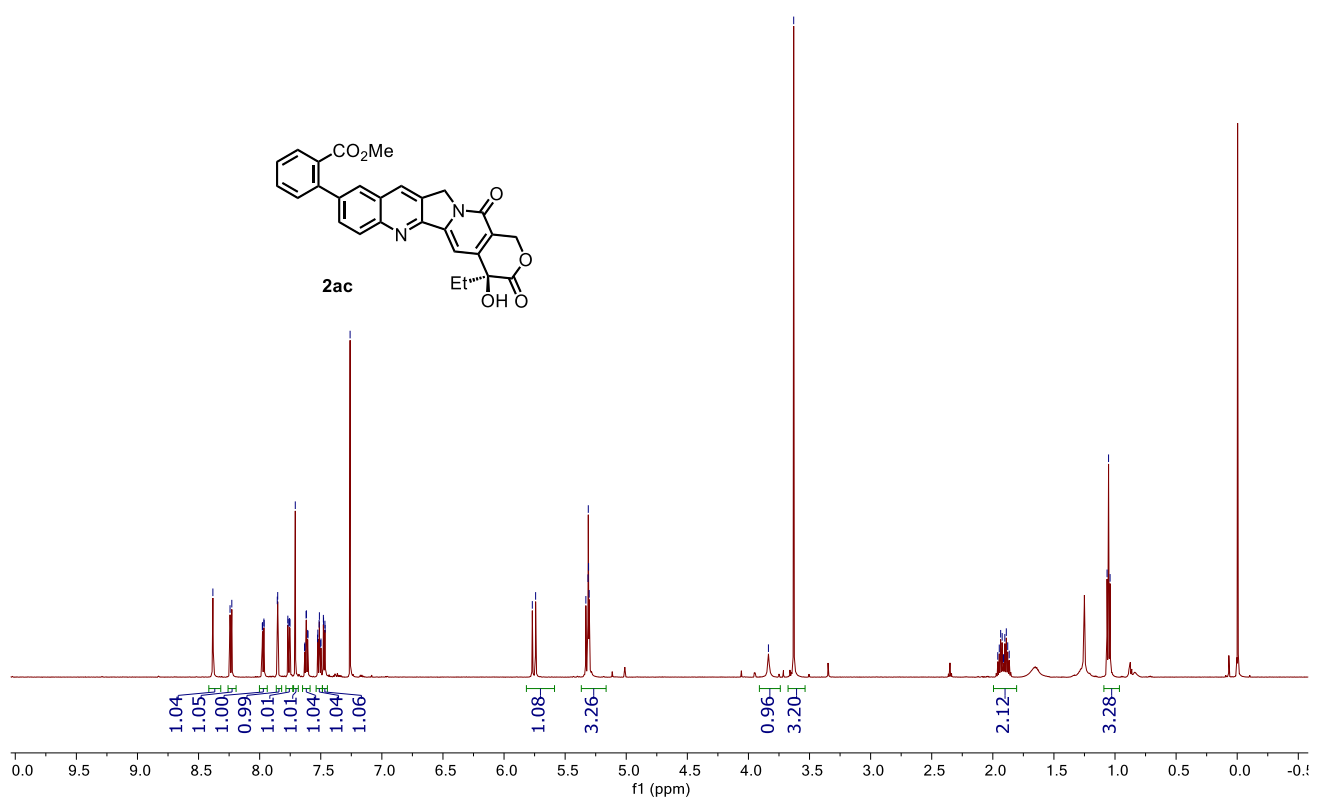

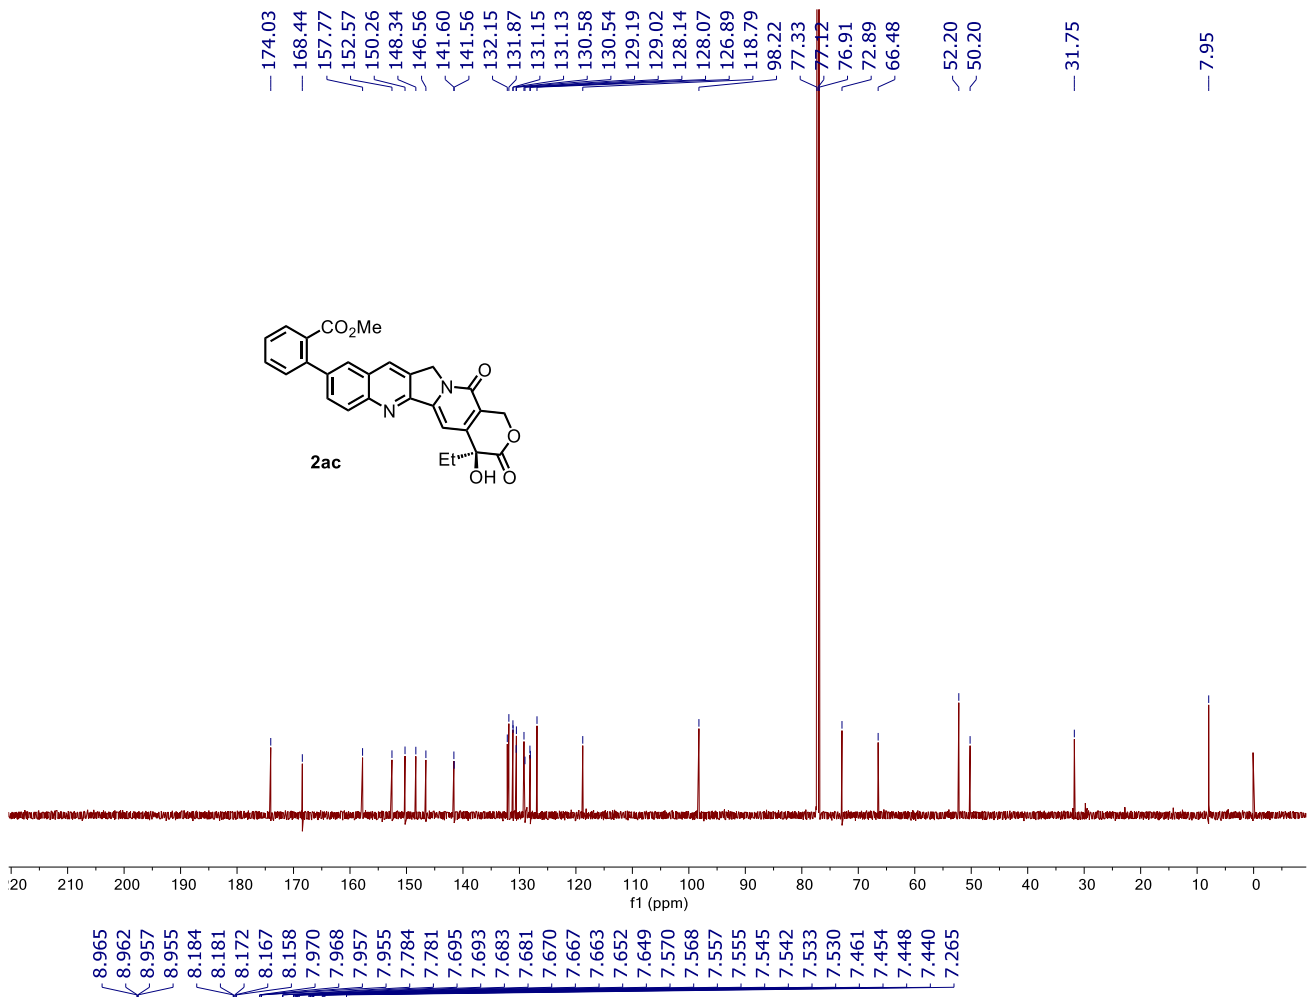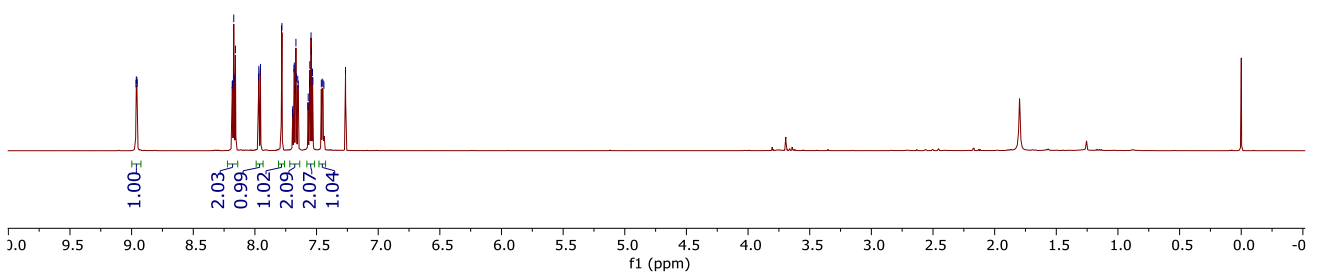



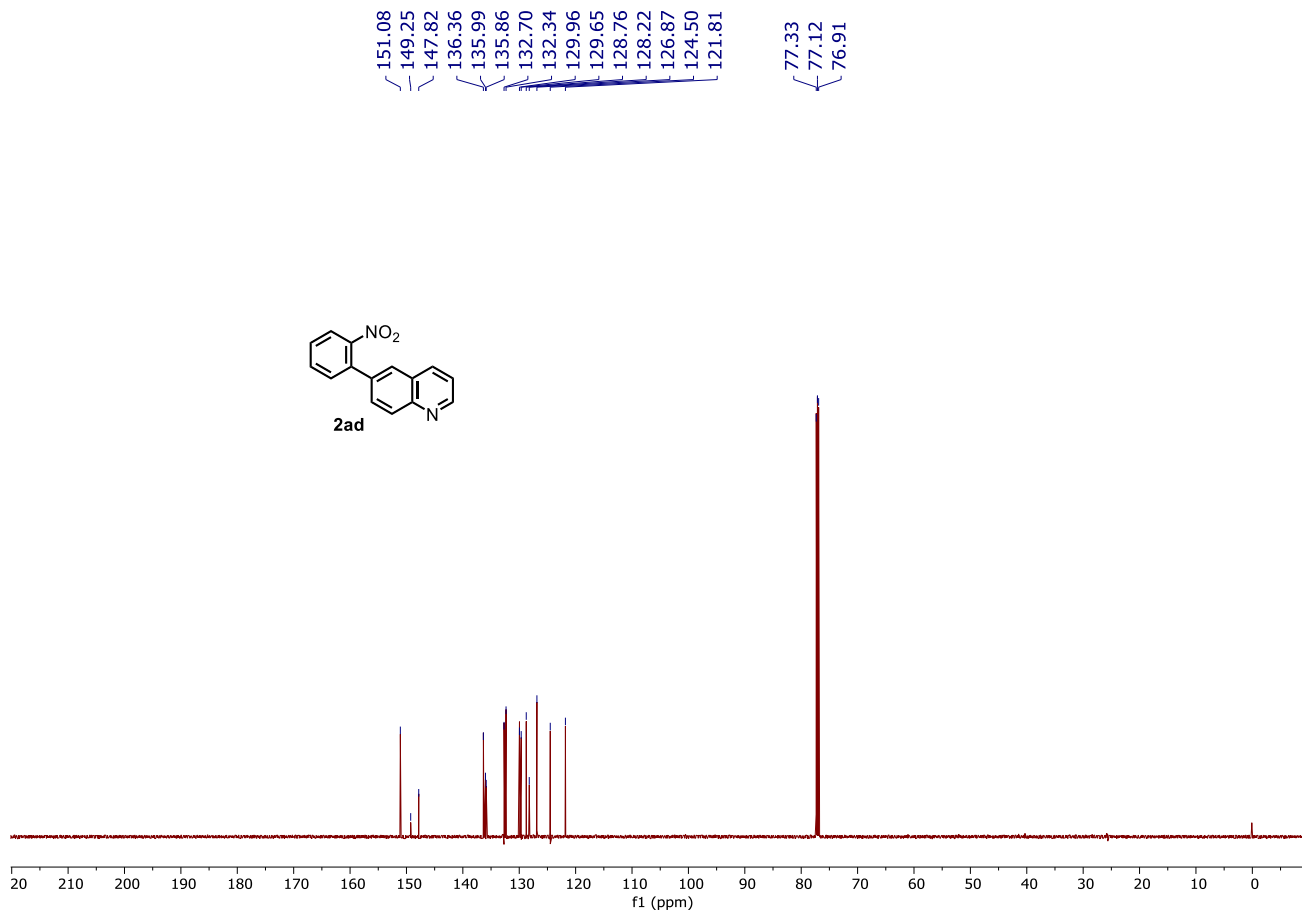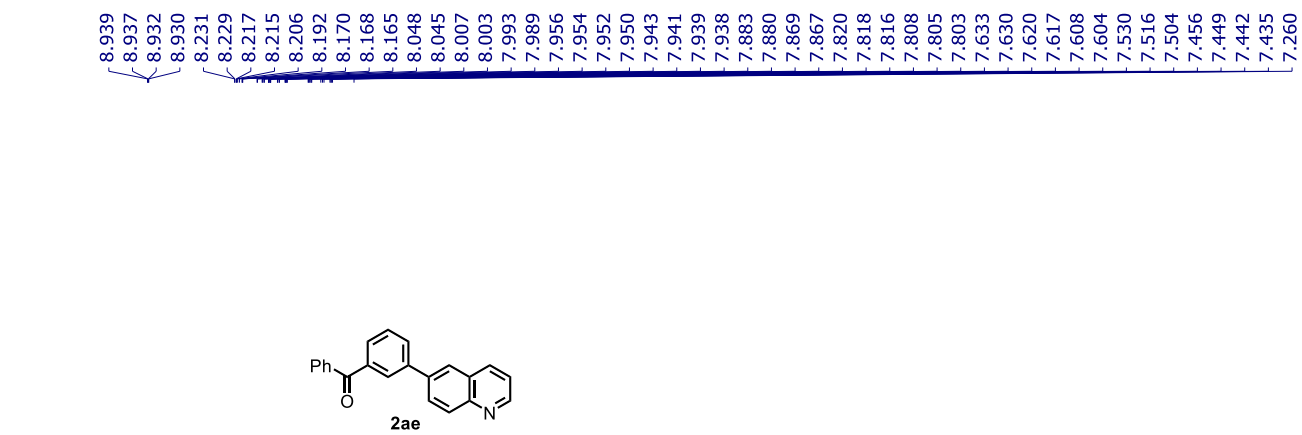

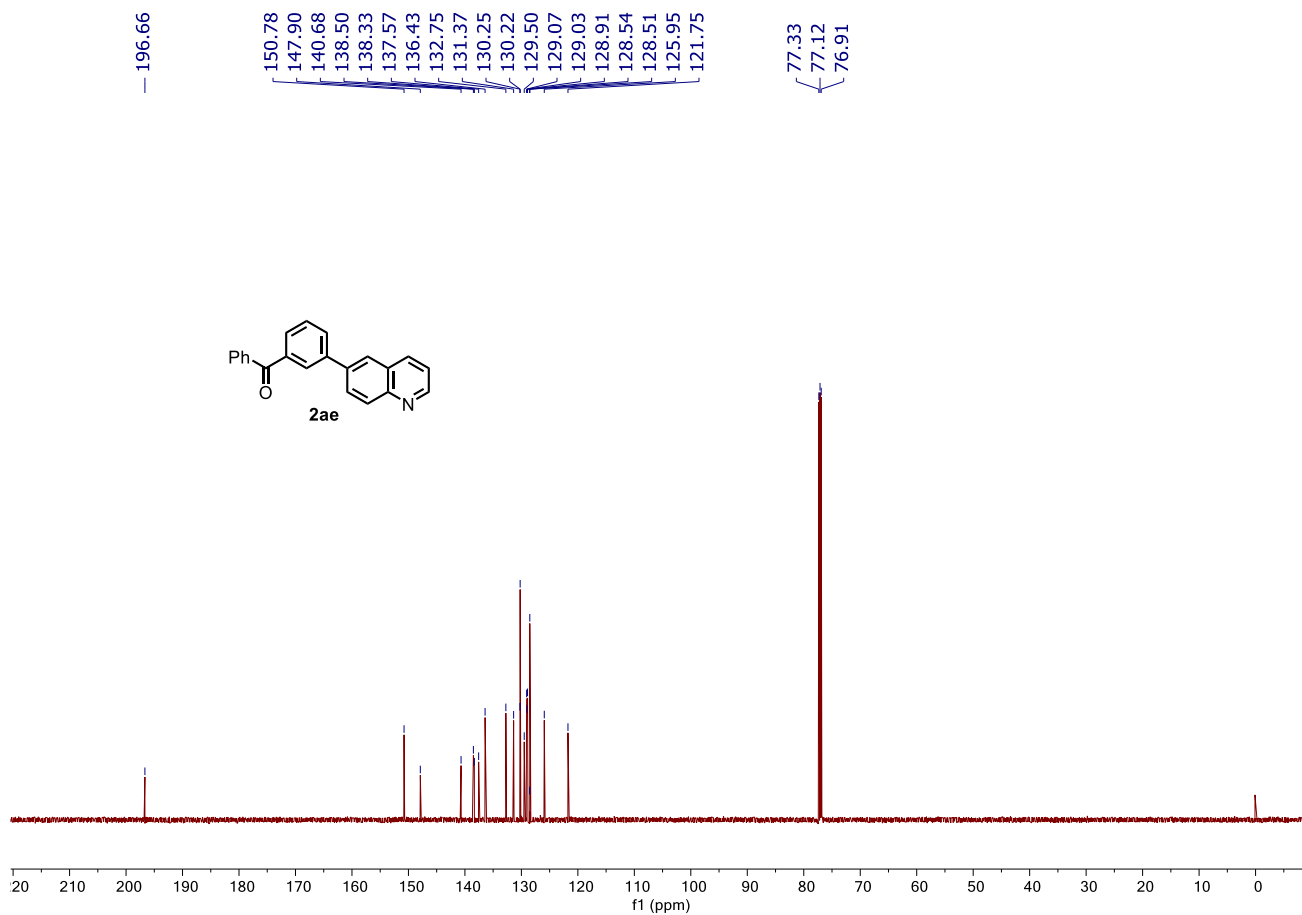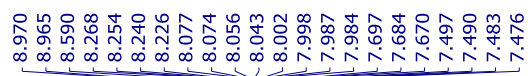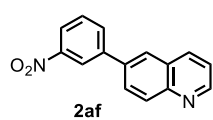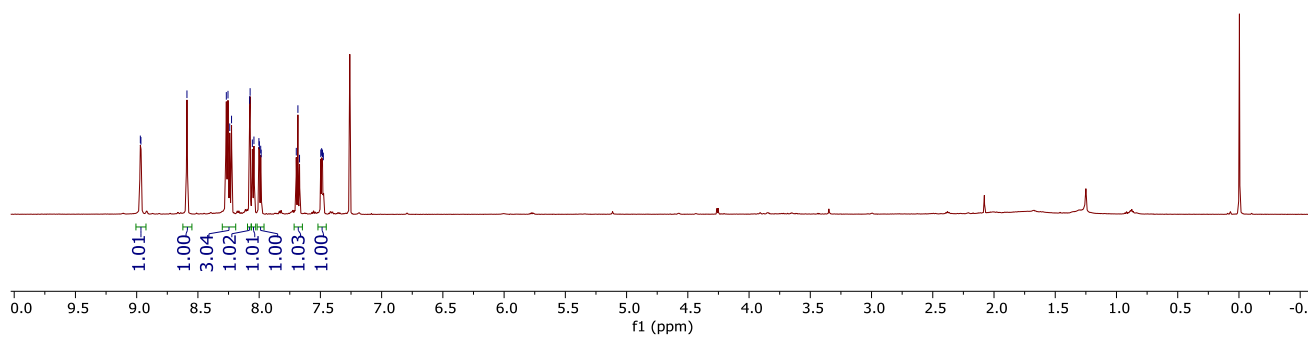

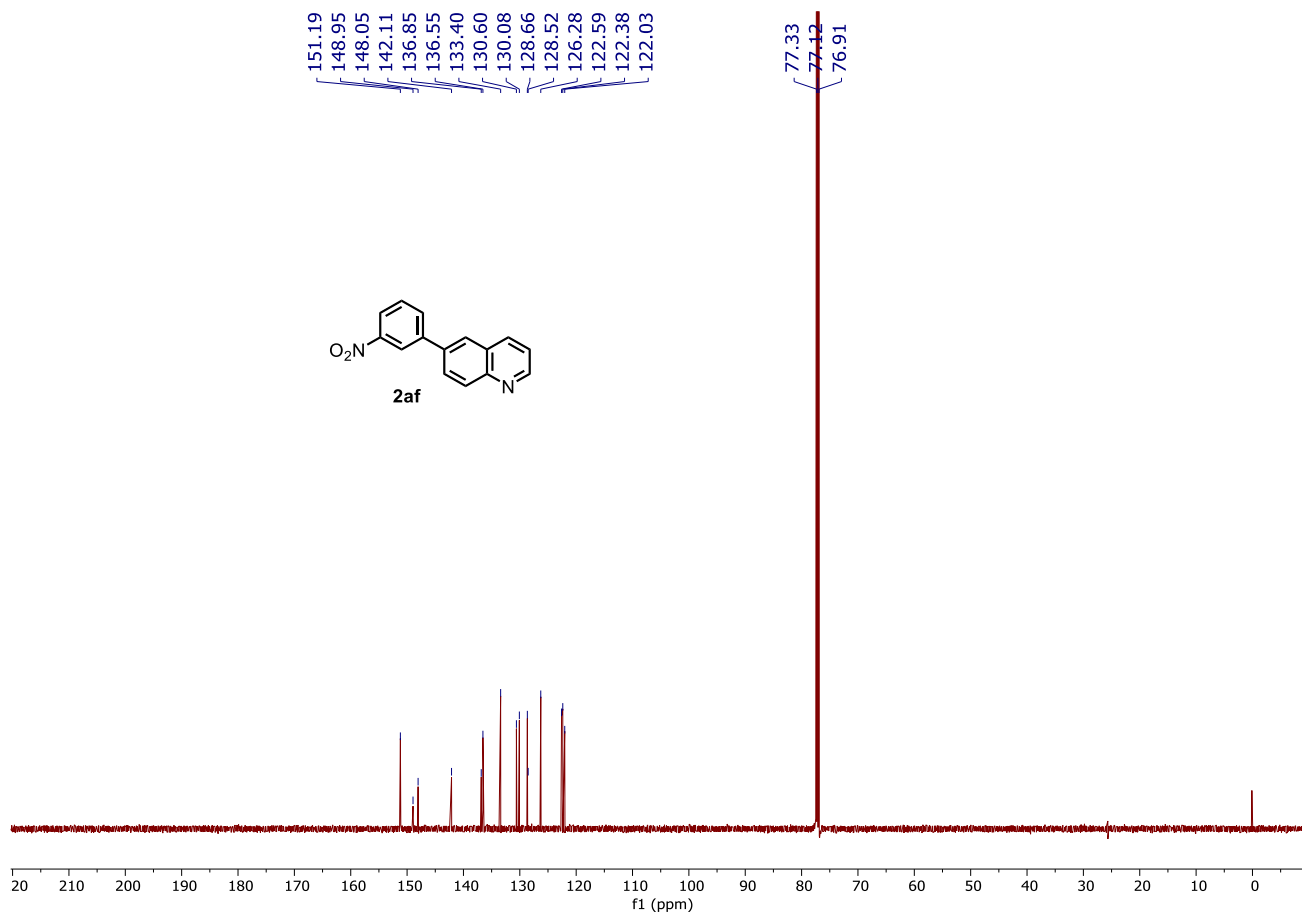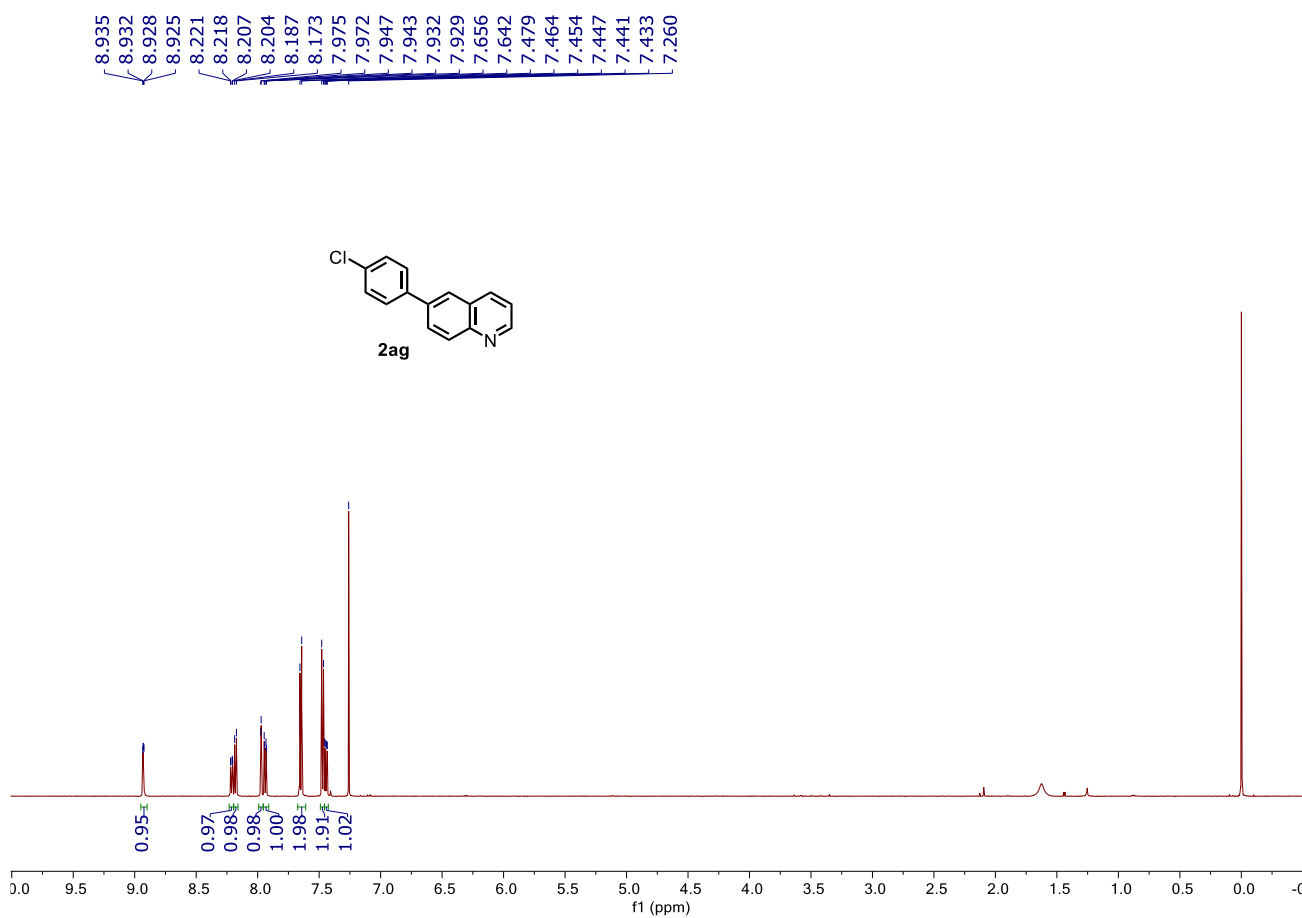

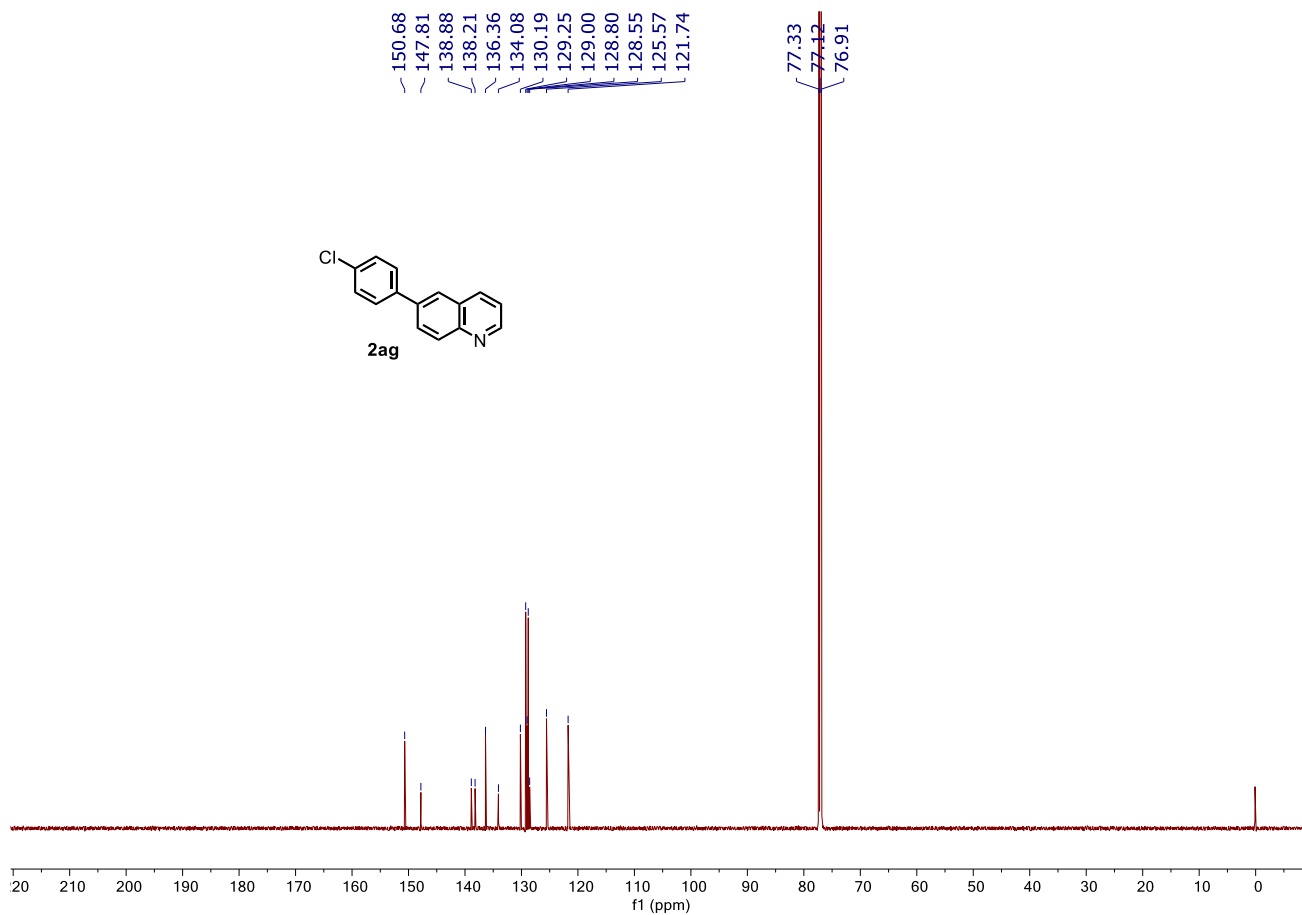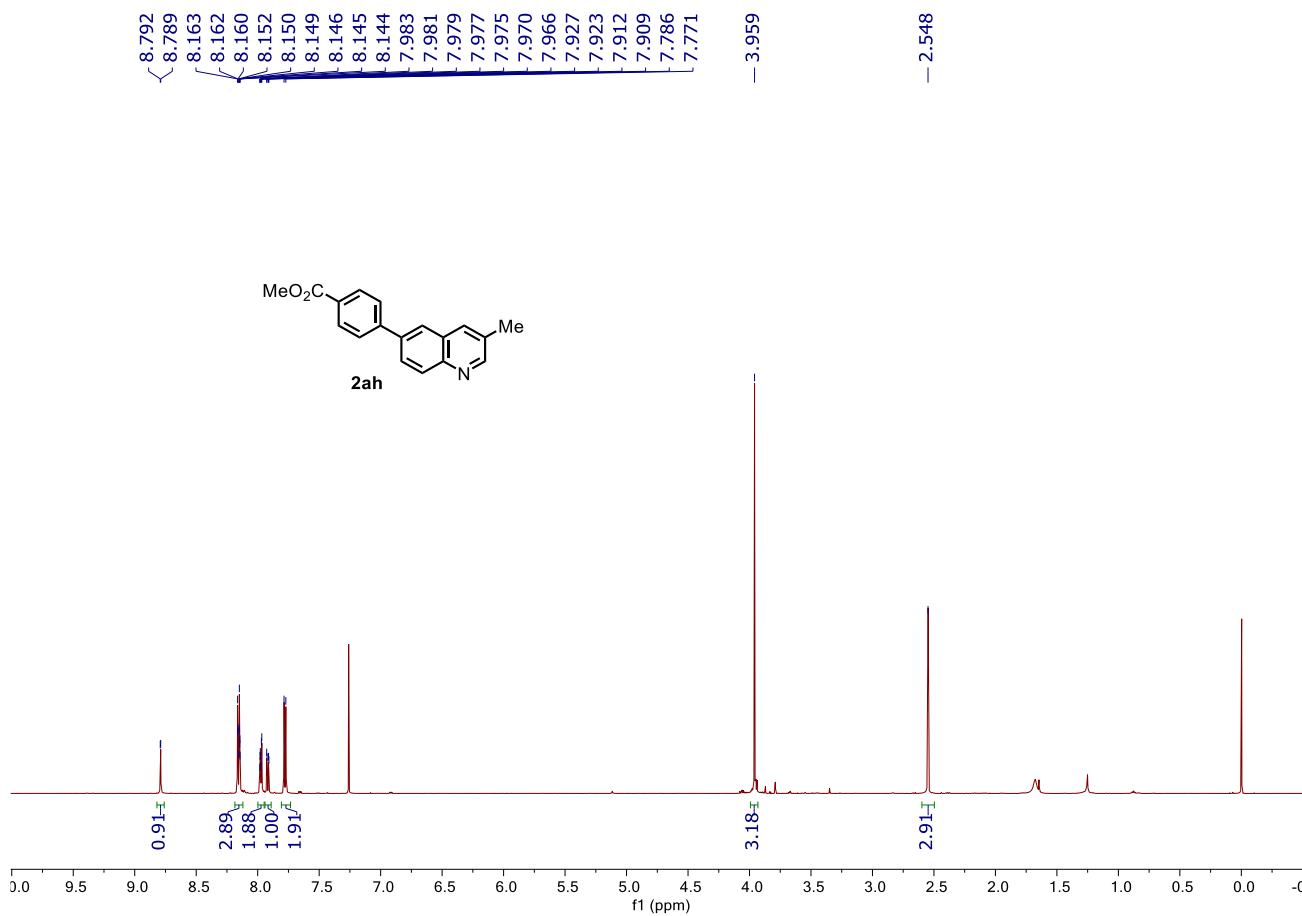

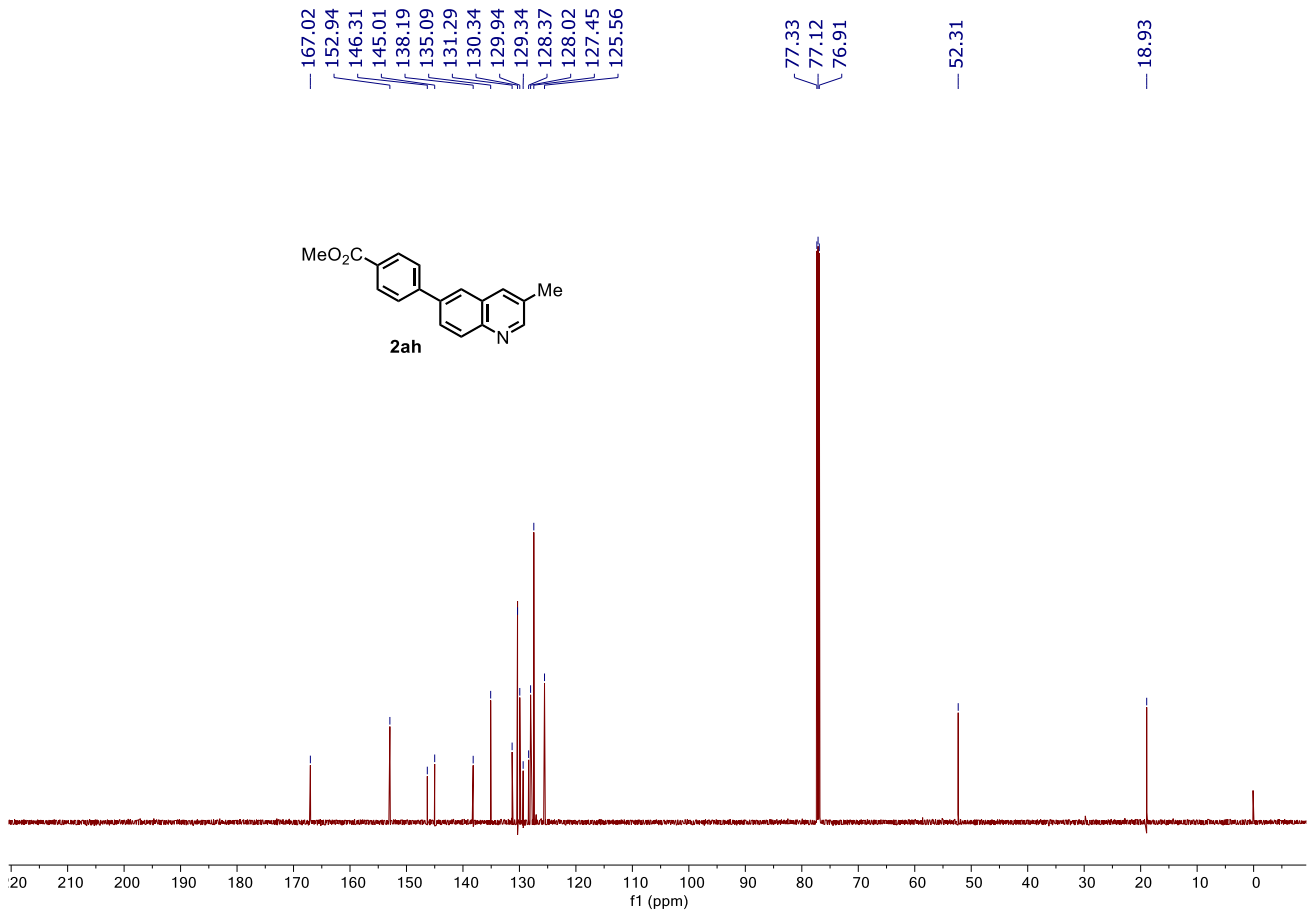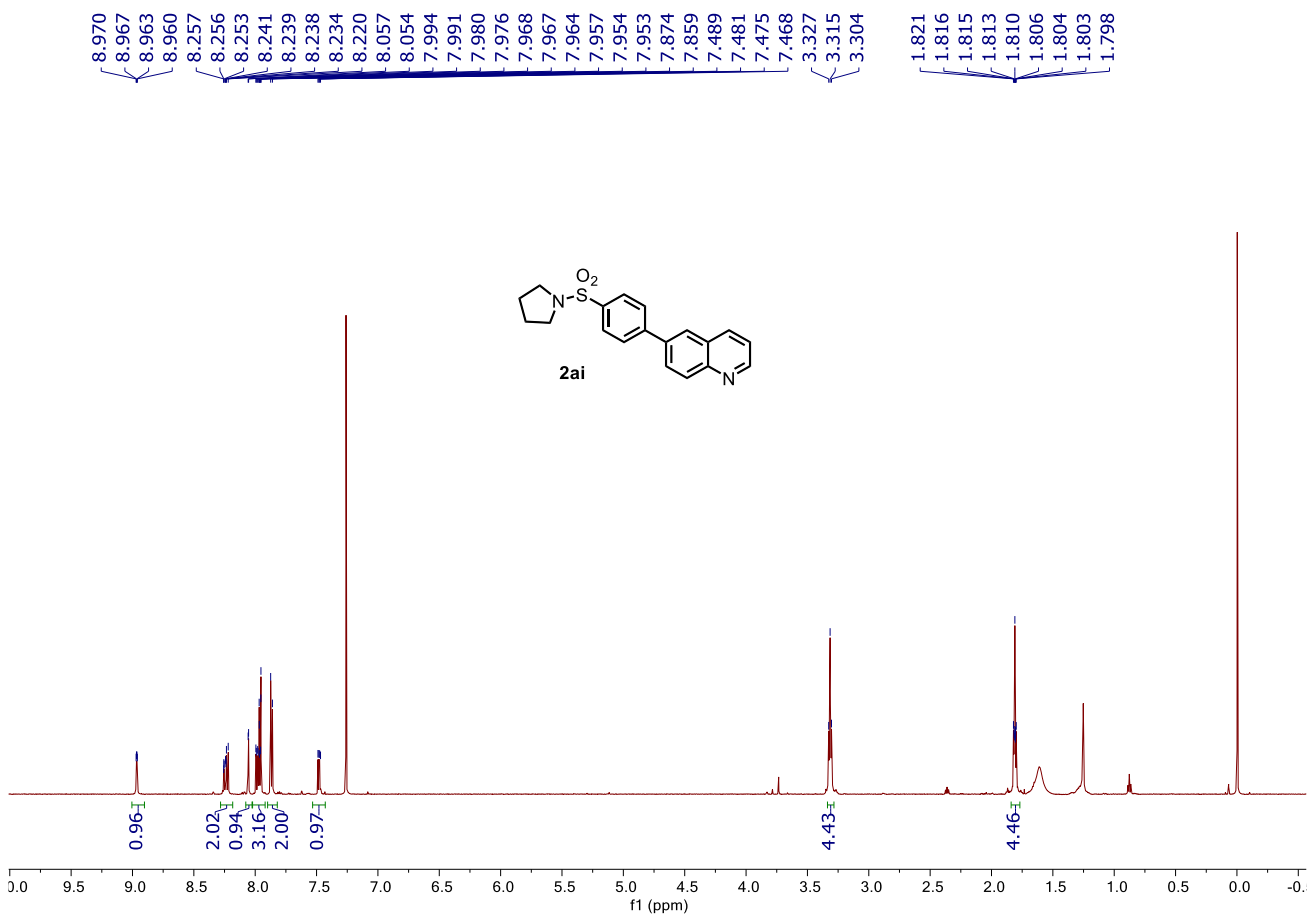

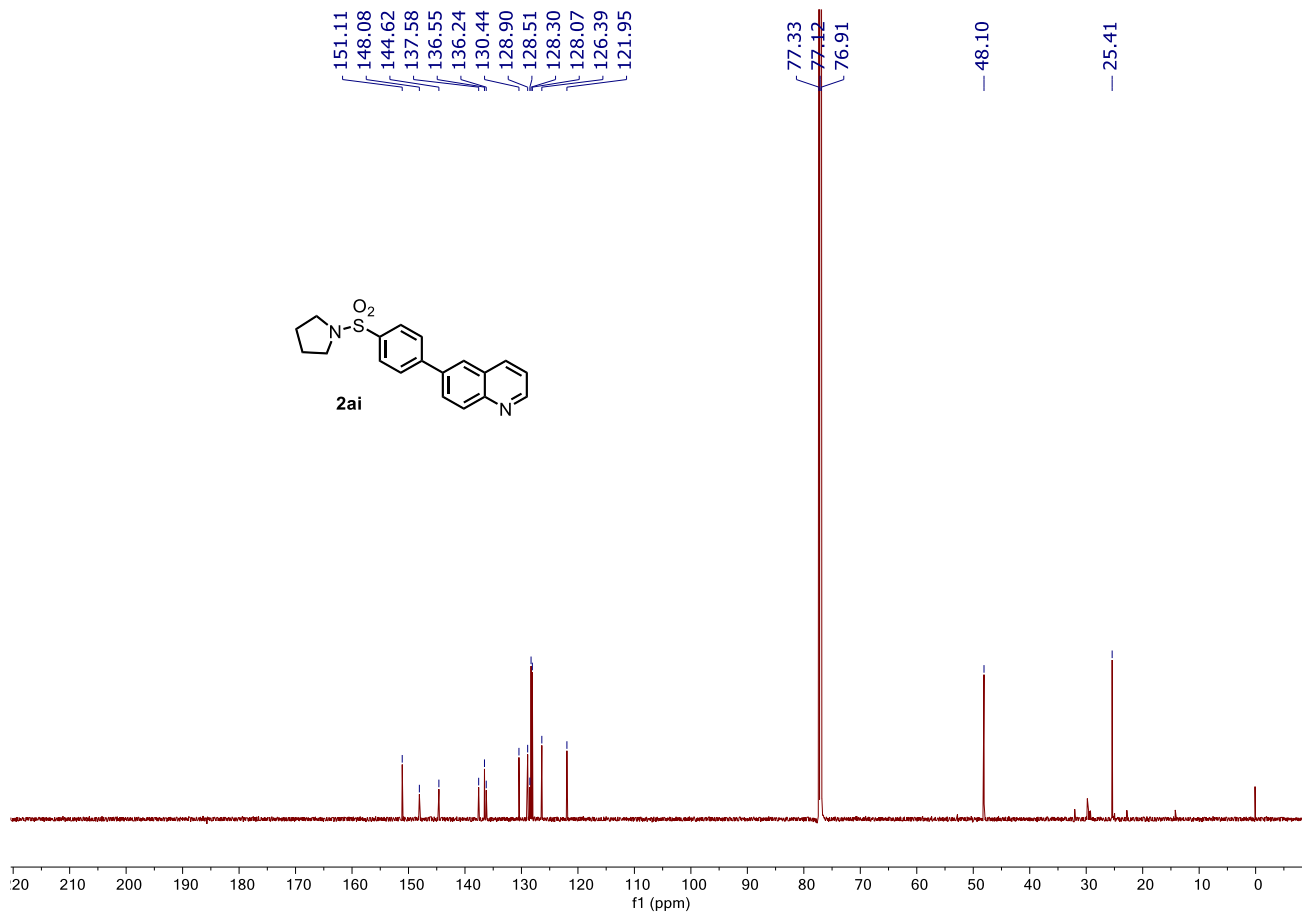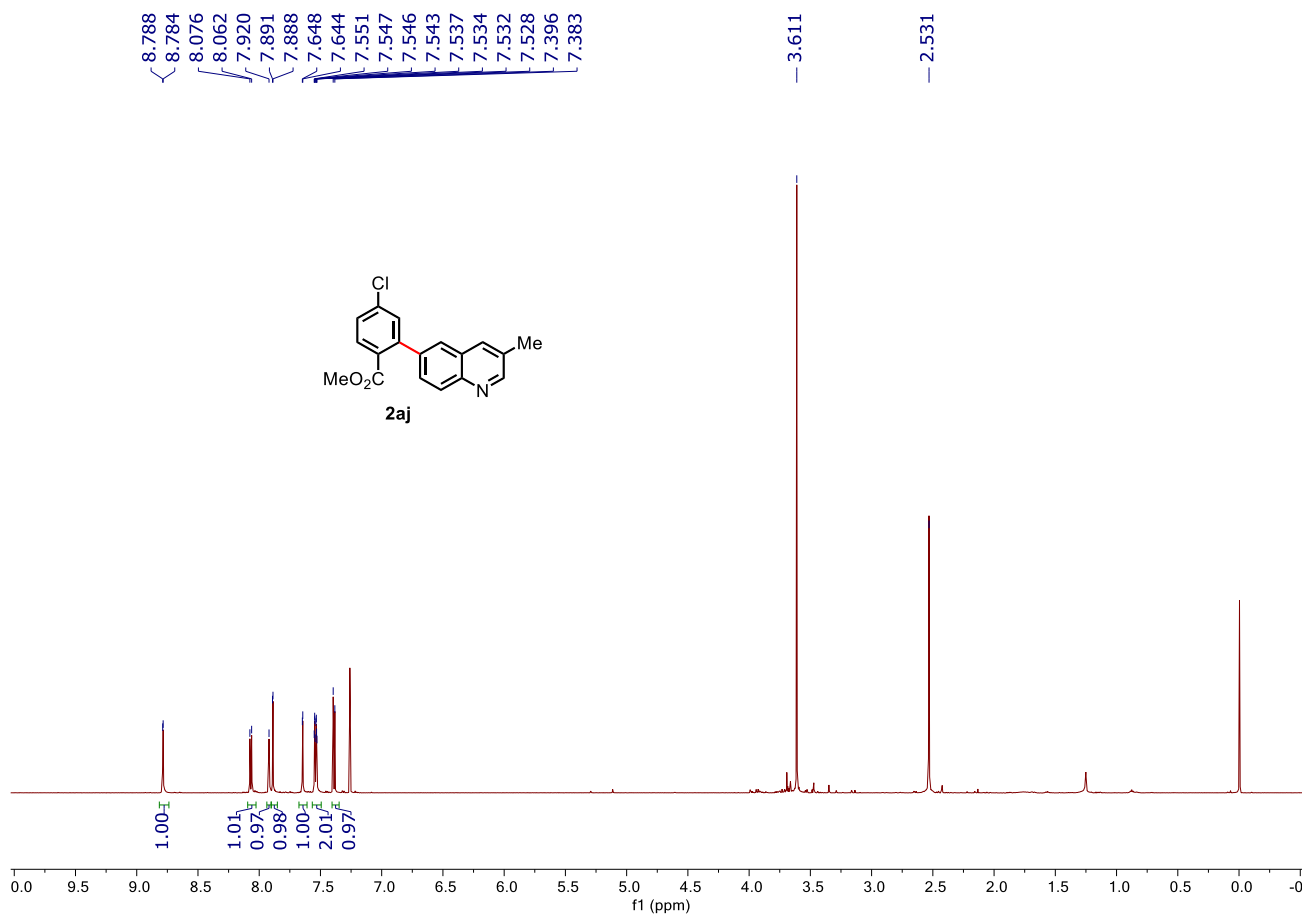

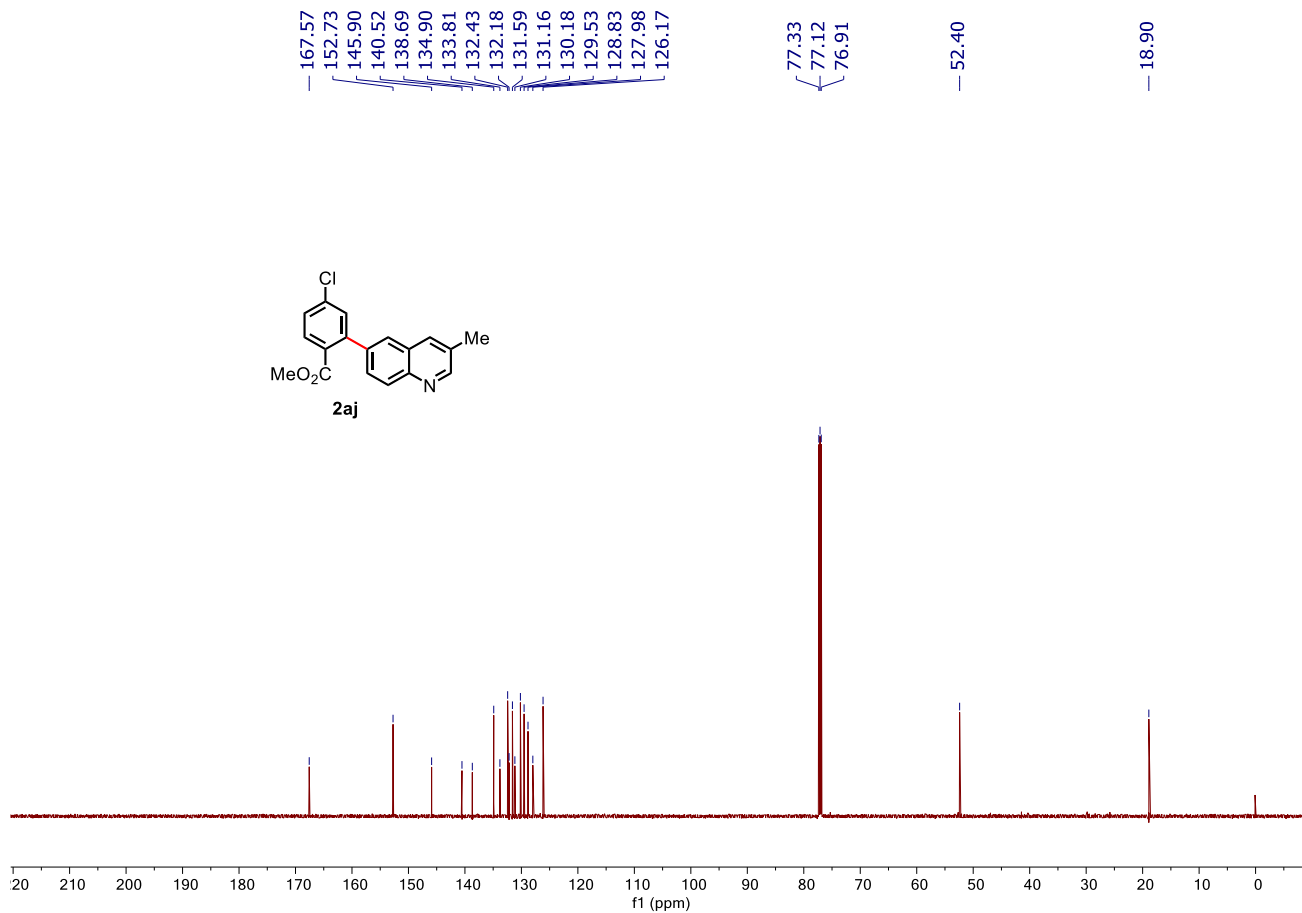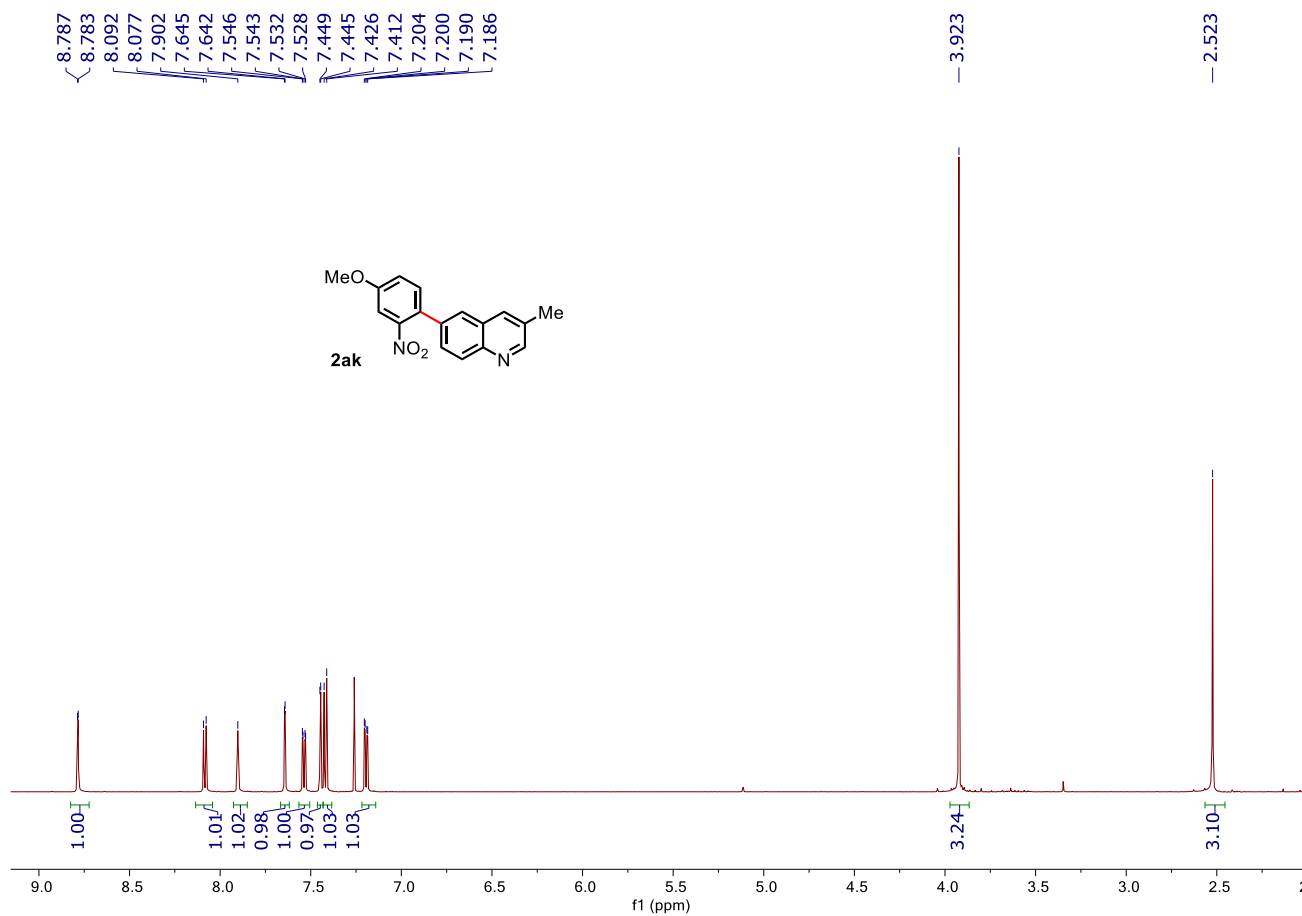

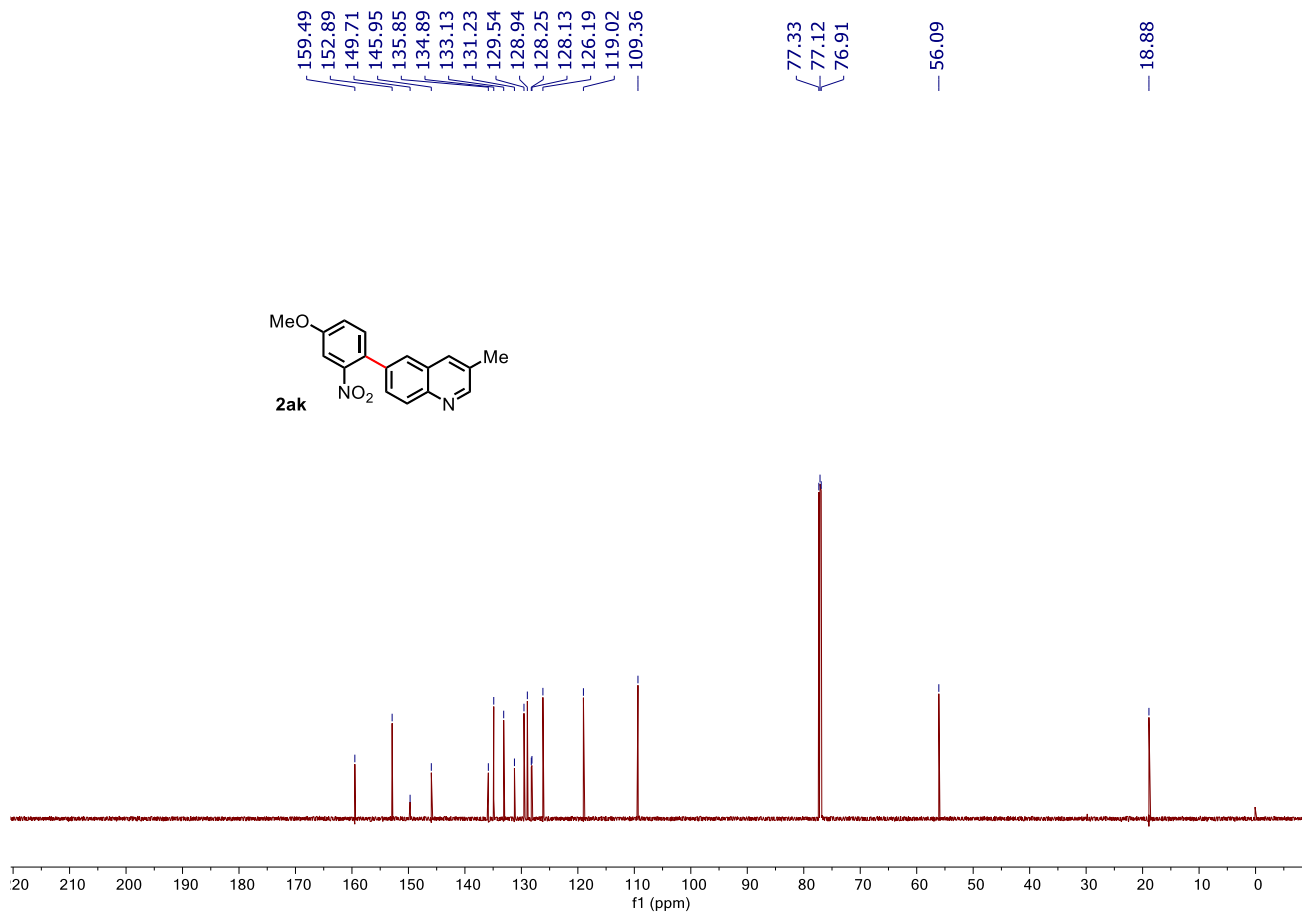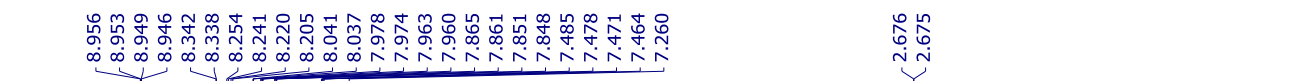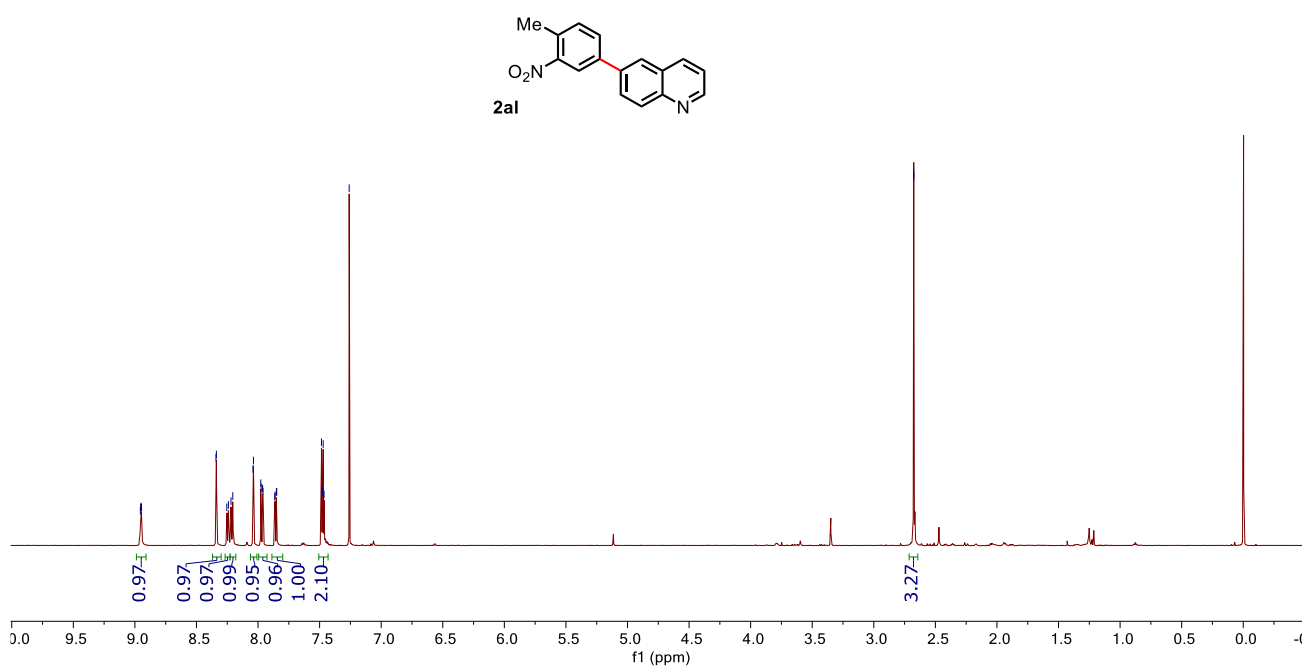



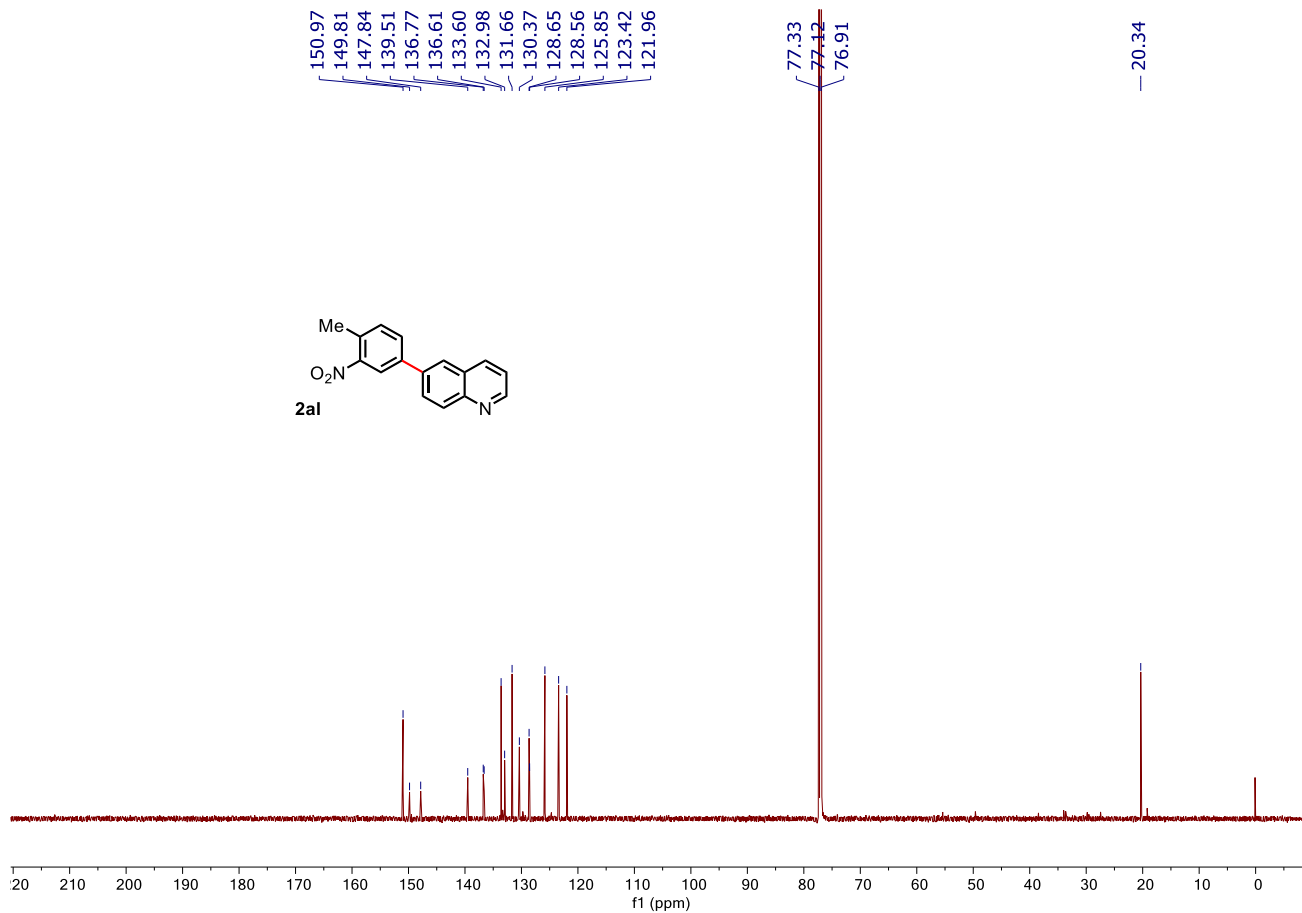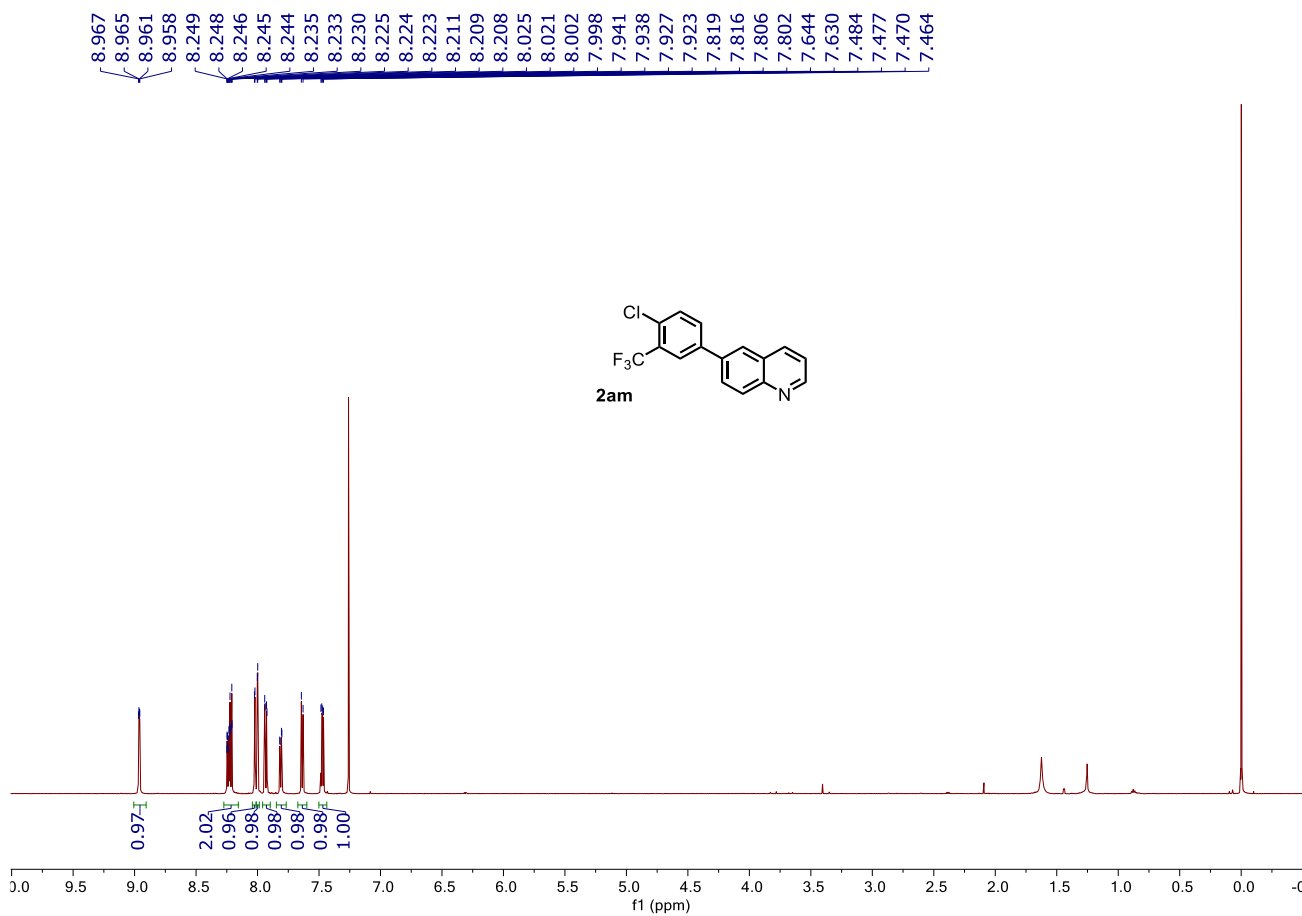

151.14  
148.03  
139.41  
136.84  
136.42  
132.19  
131.88  
131.87  
131.85  
131.84  
131.63  
130.62  
129.41  
129.21  
129.00  
128.79  
128.60  
128.51  
126.61  
126.58  
126.54  
126.51  
125.99  
125.64  
123.83  
122.02  
121.99  
120.21  
77.33  
77.12  
76.91

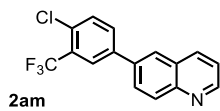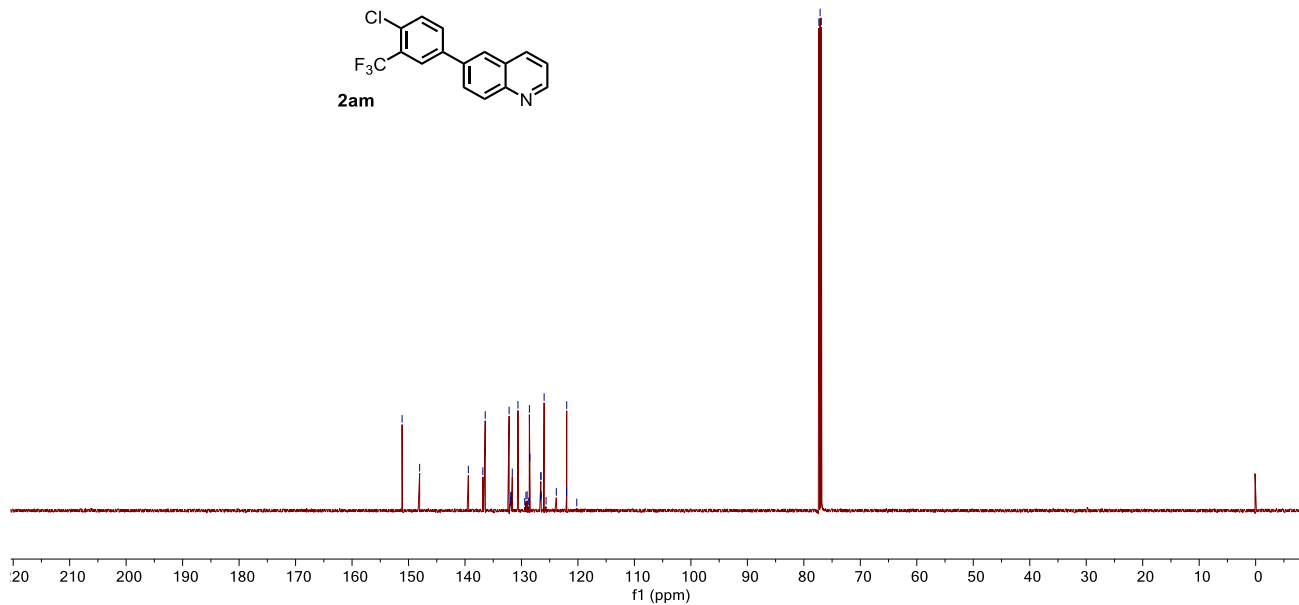

-62.885

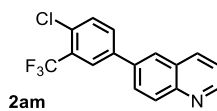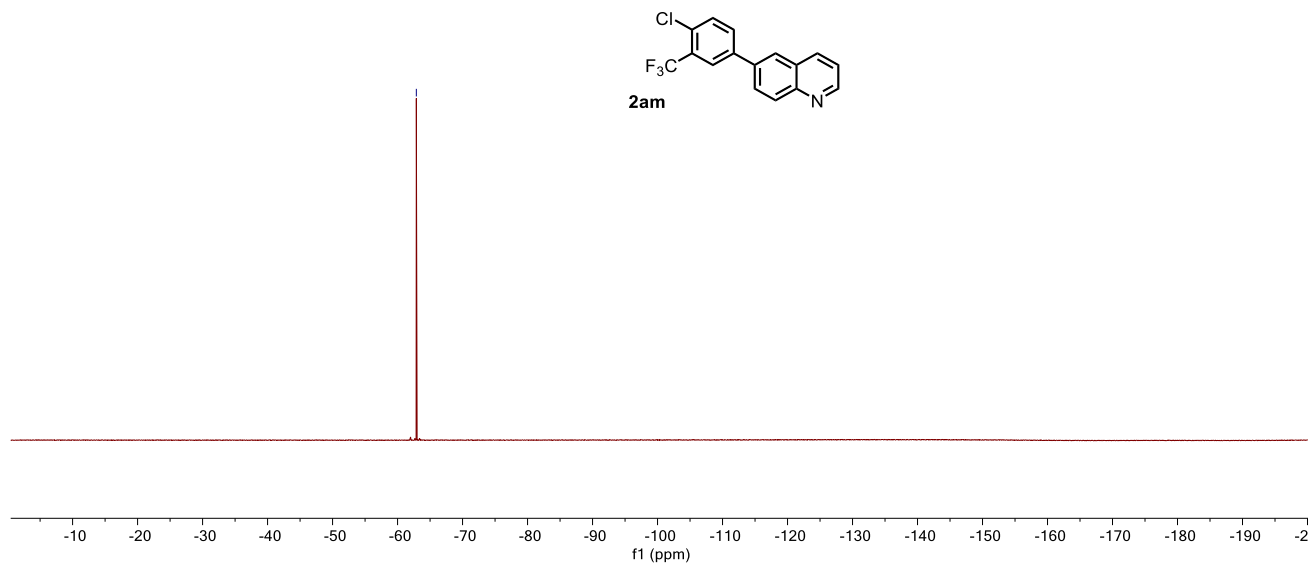

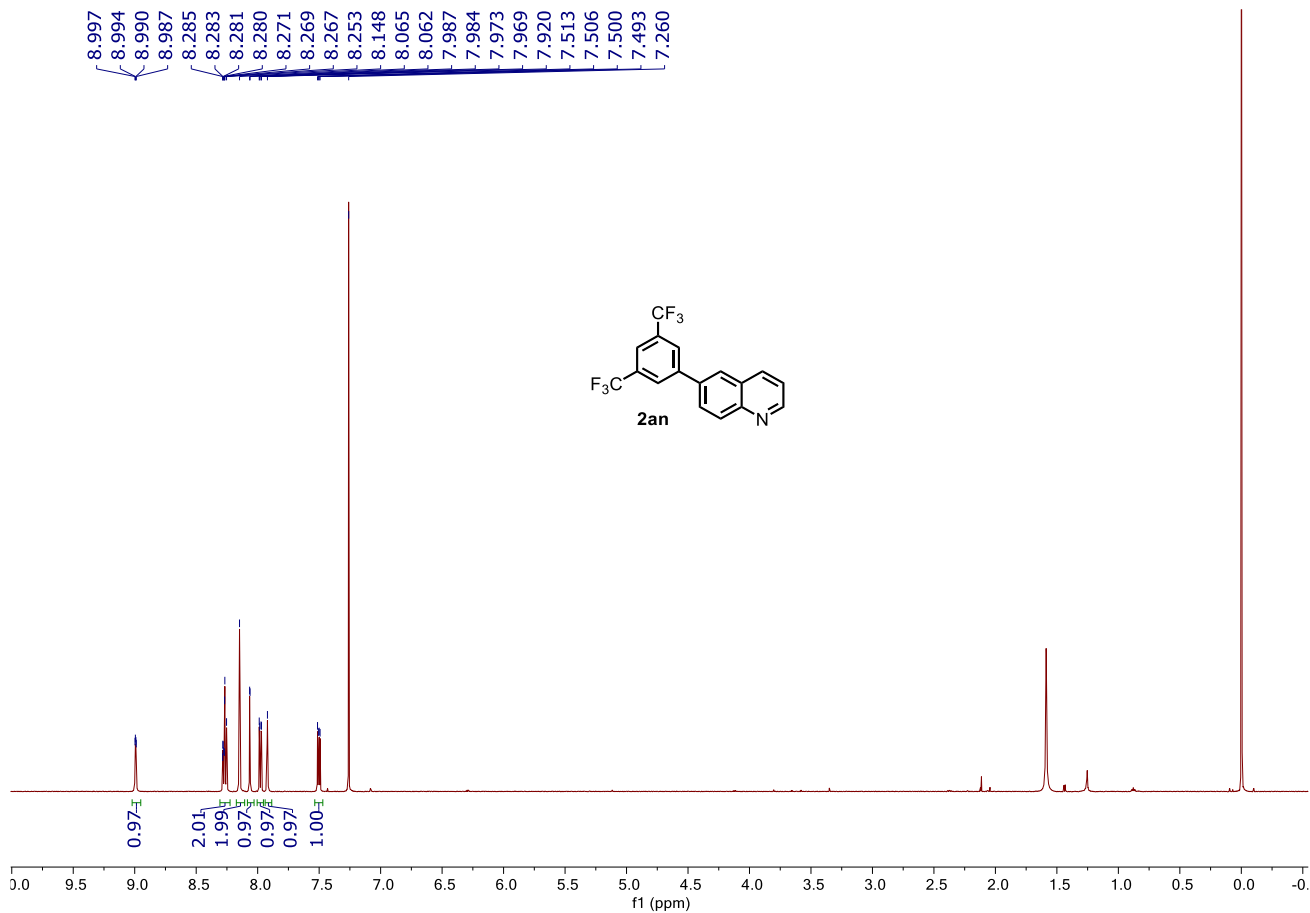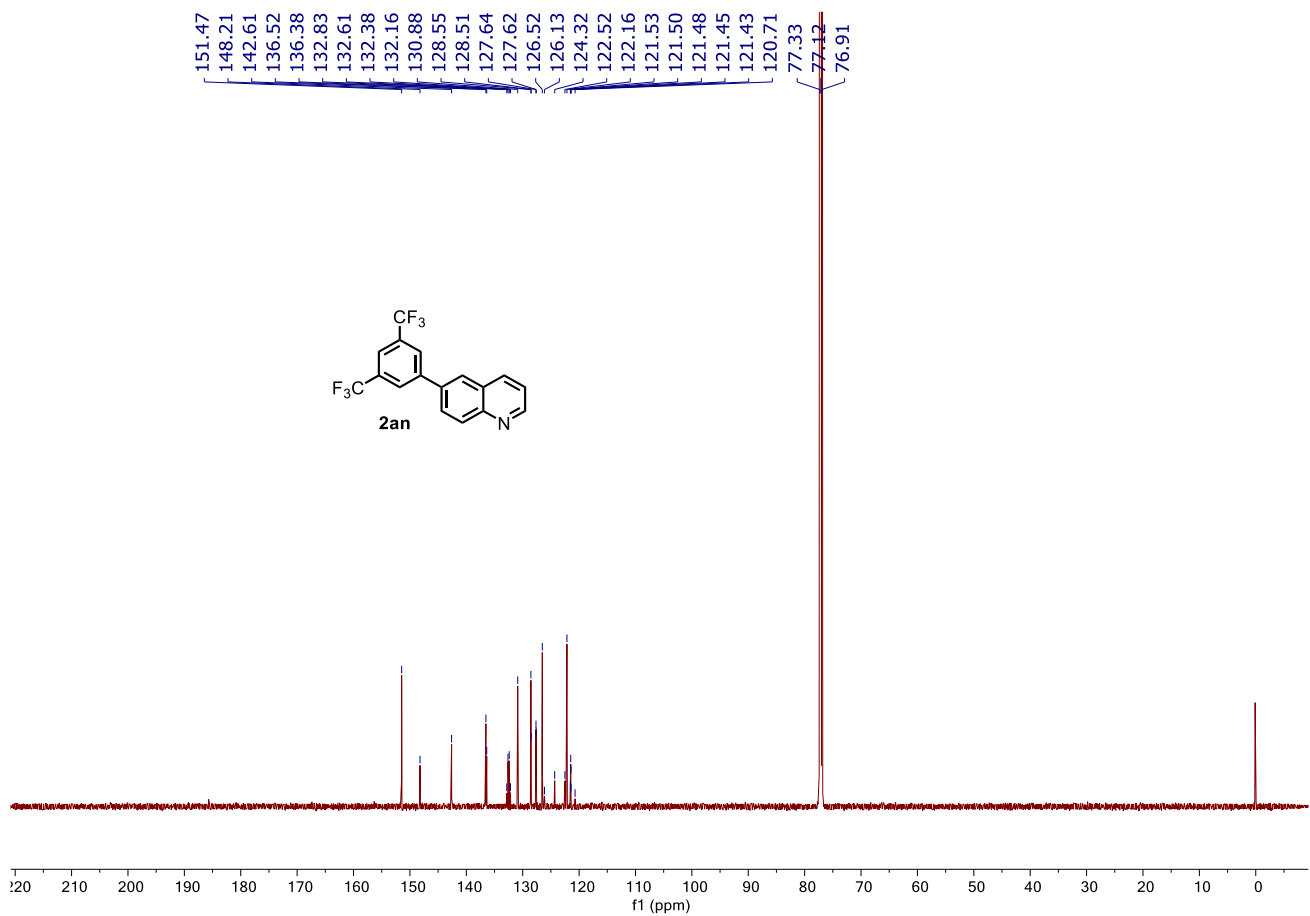

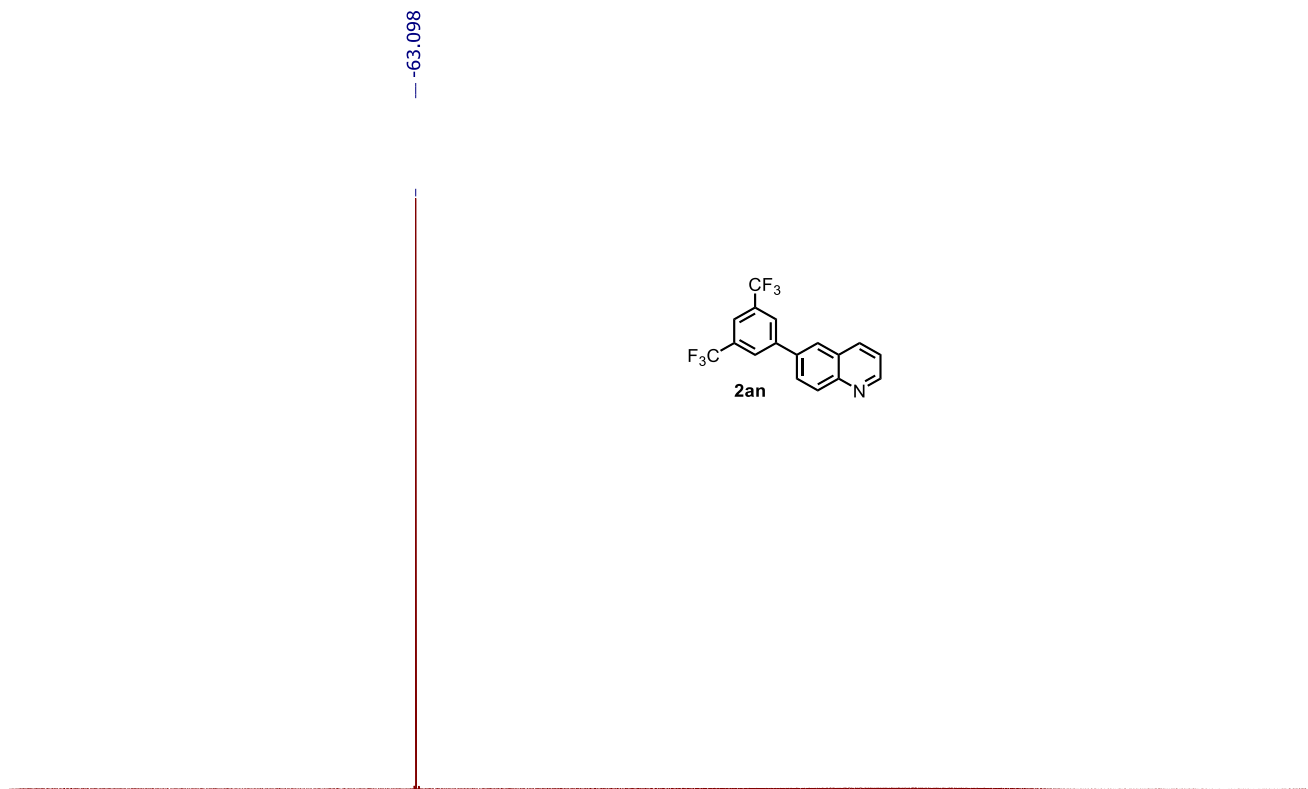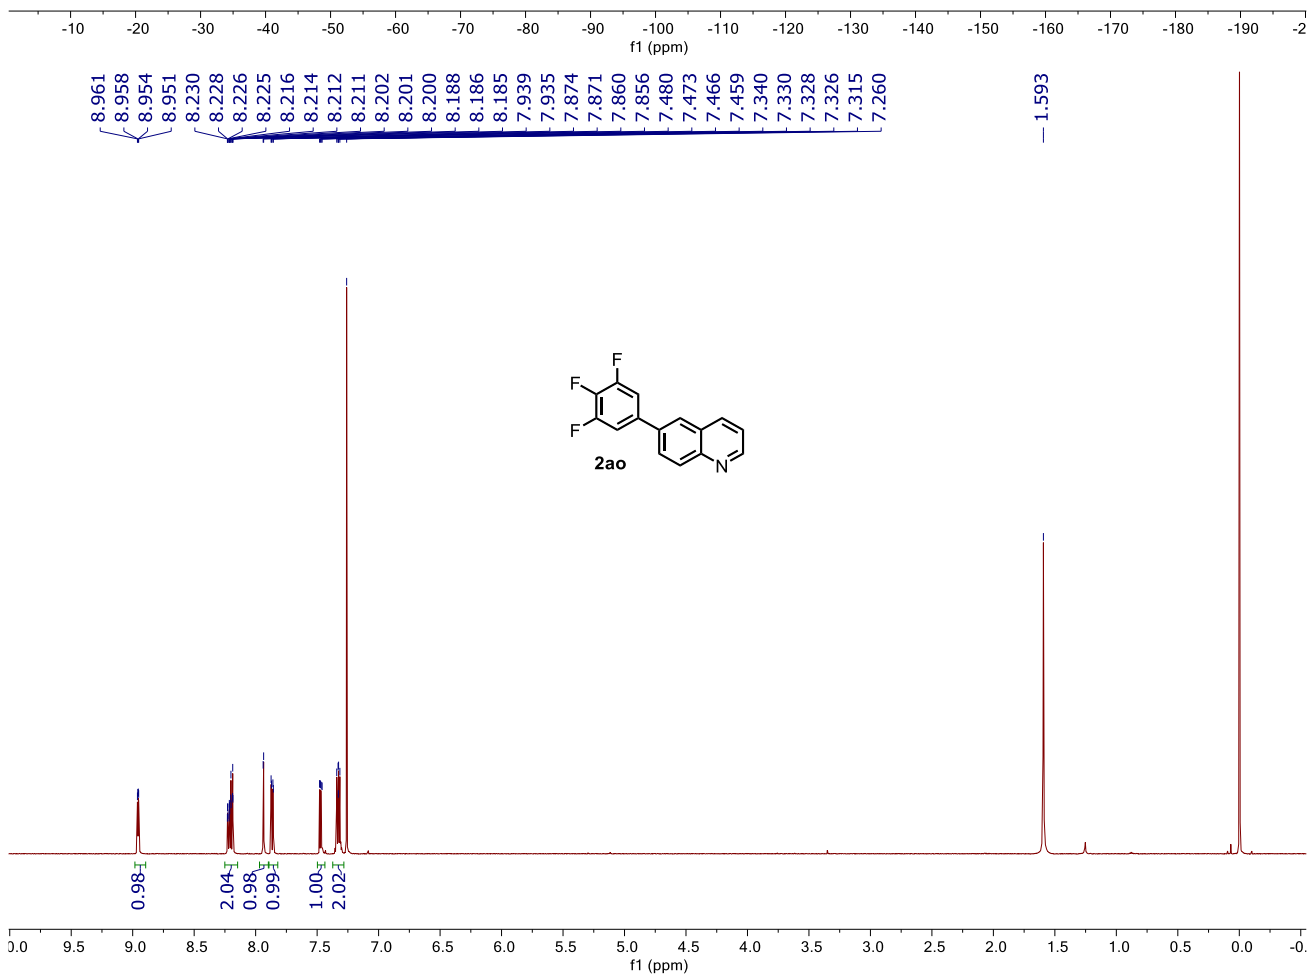

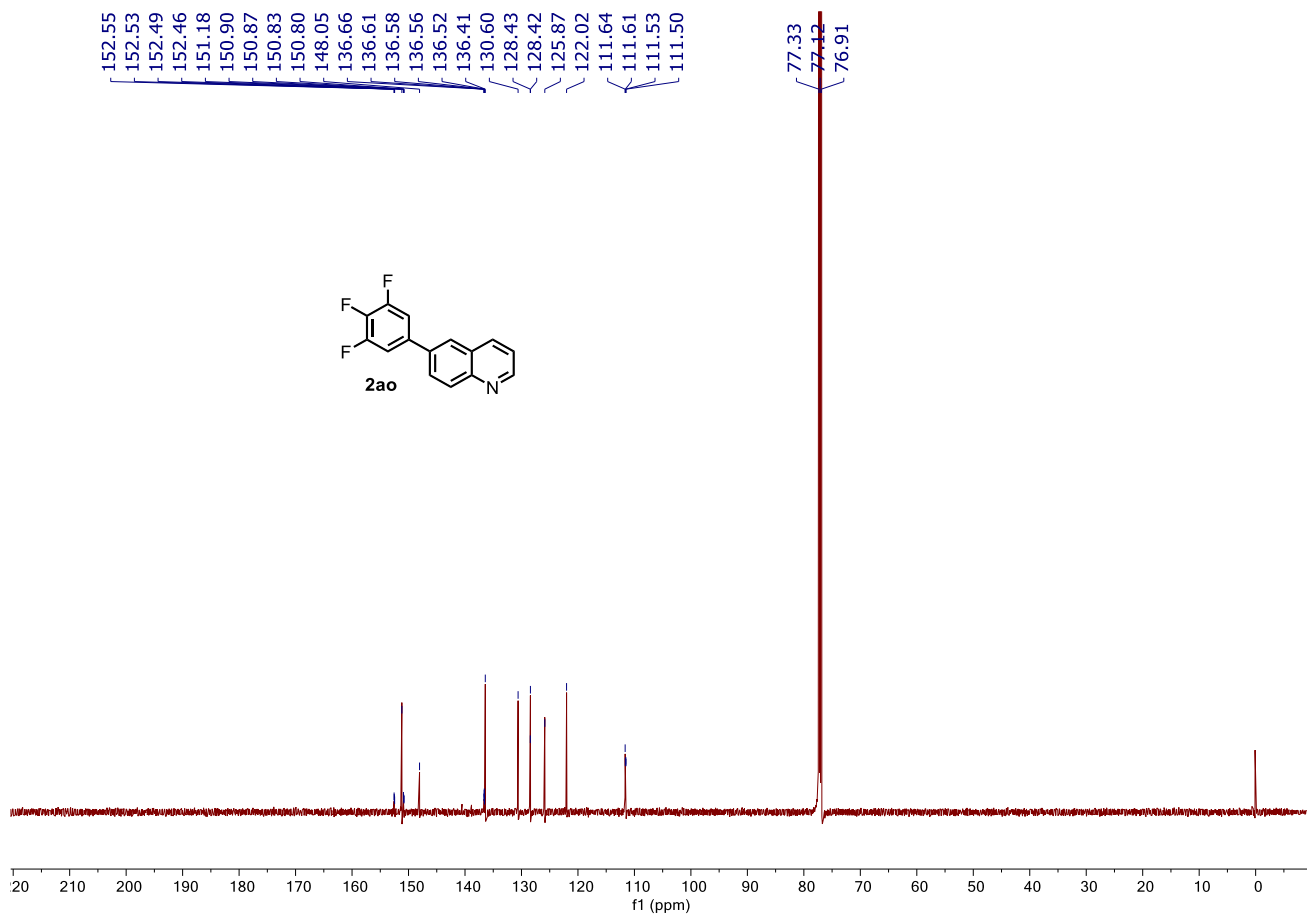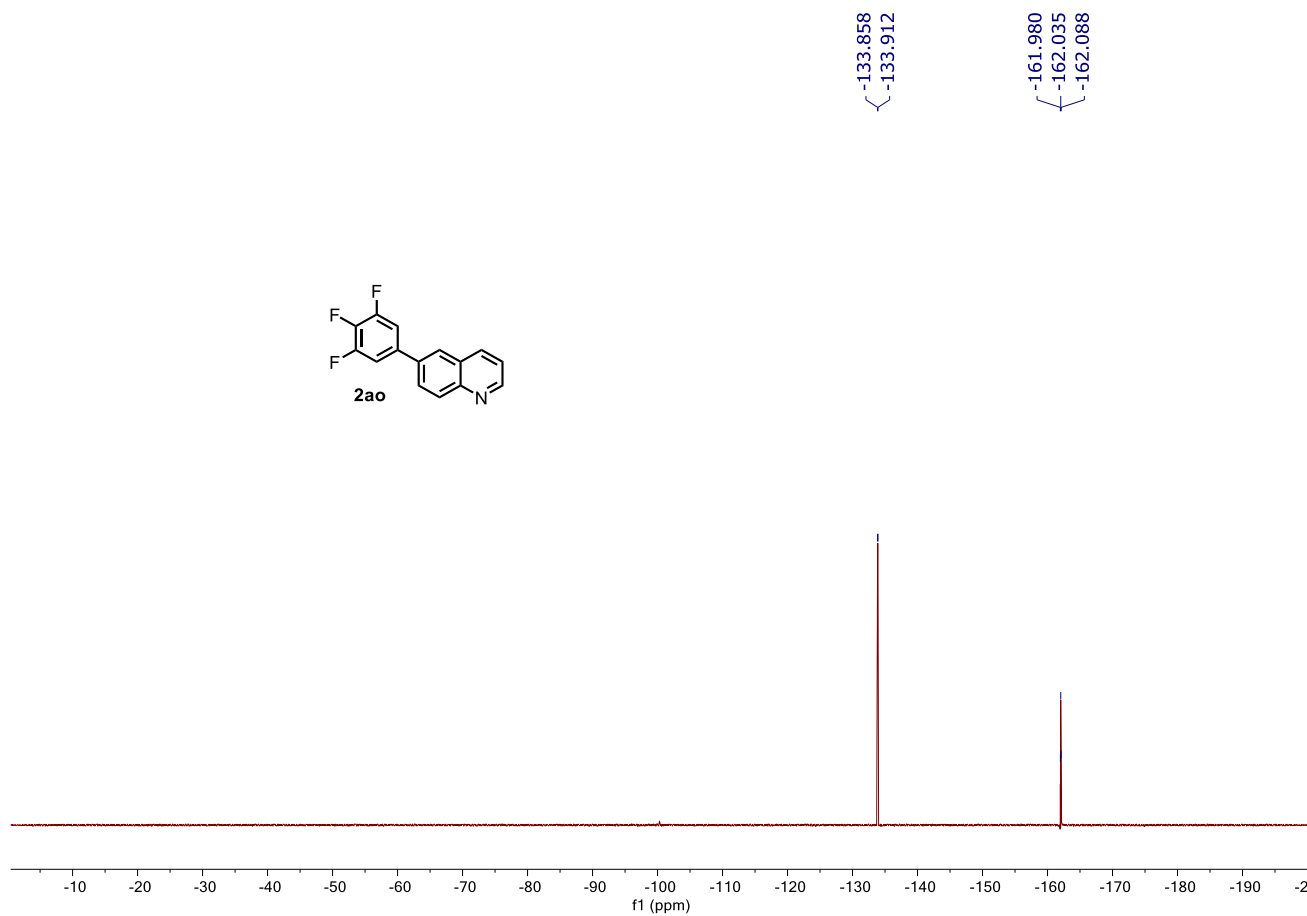

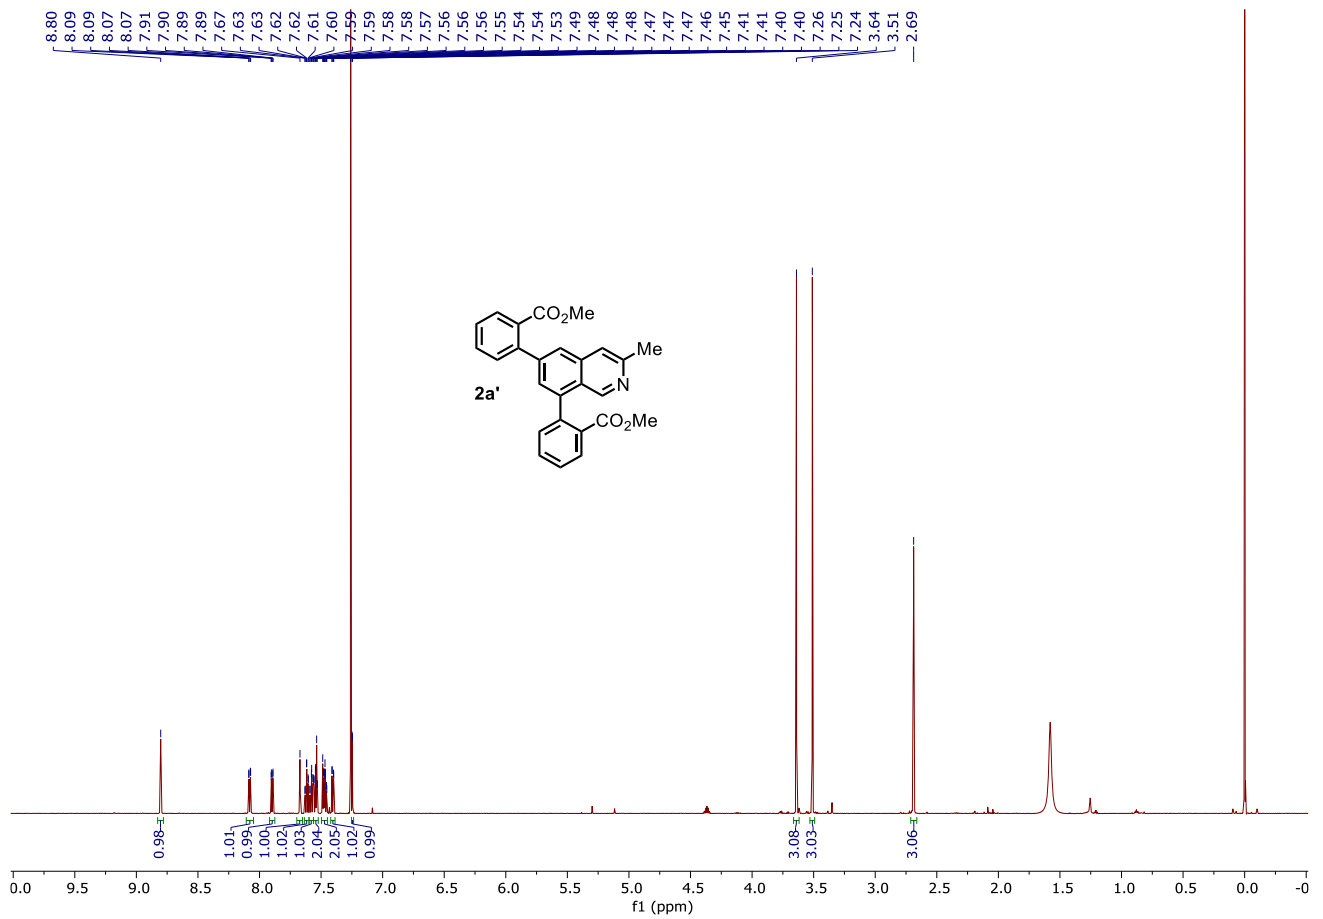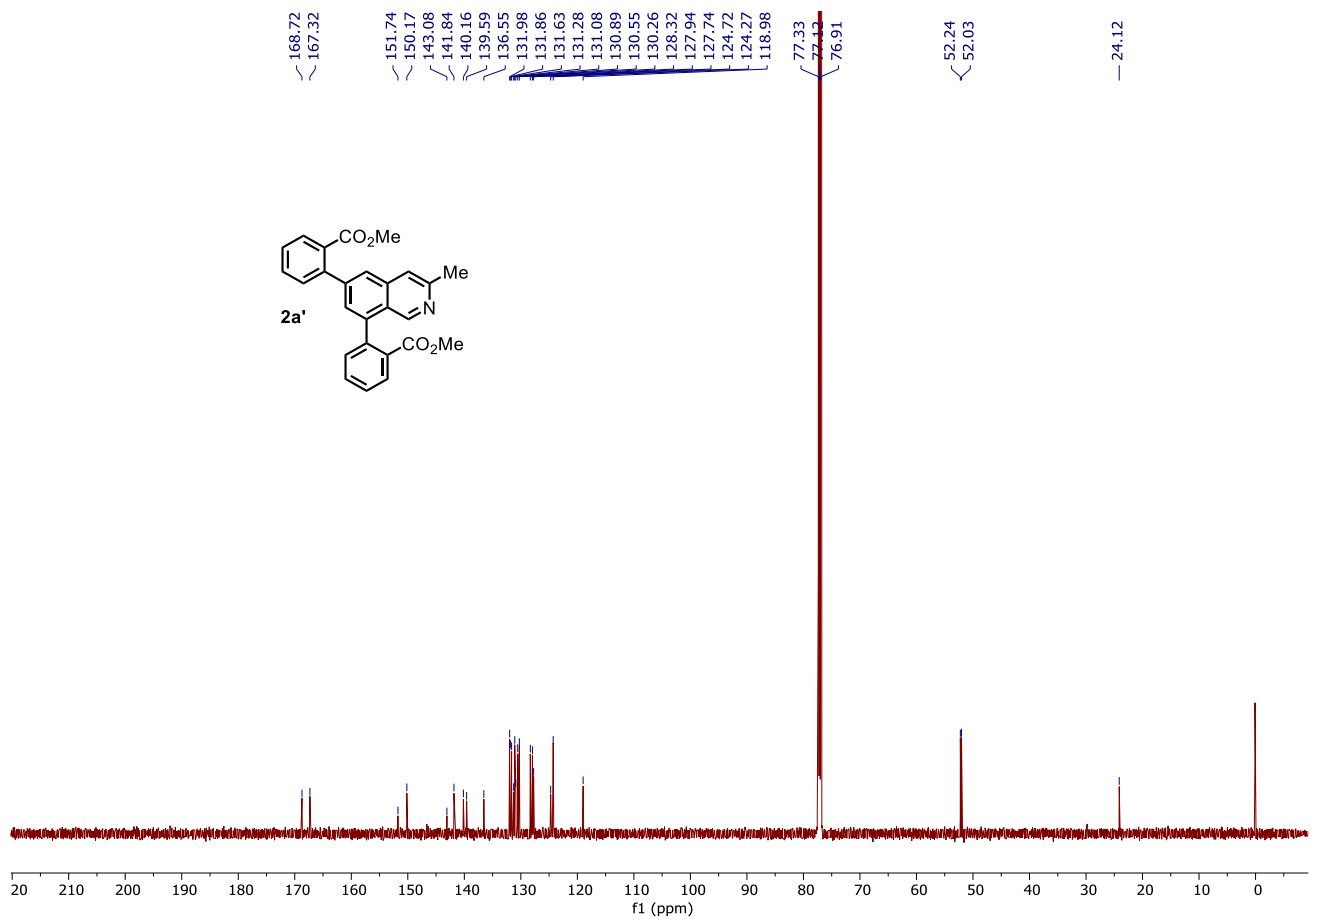

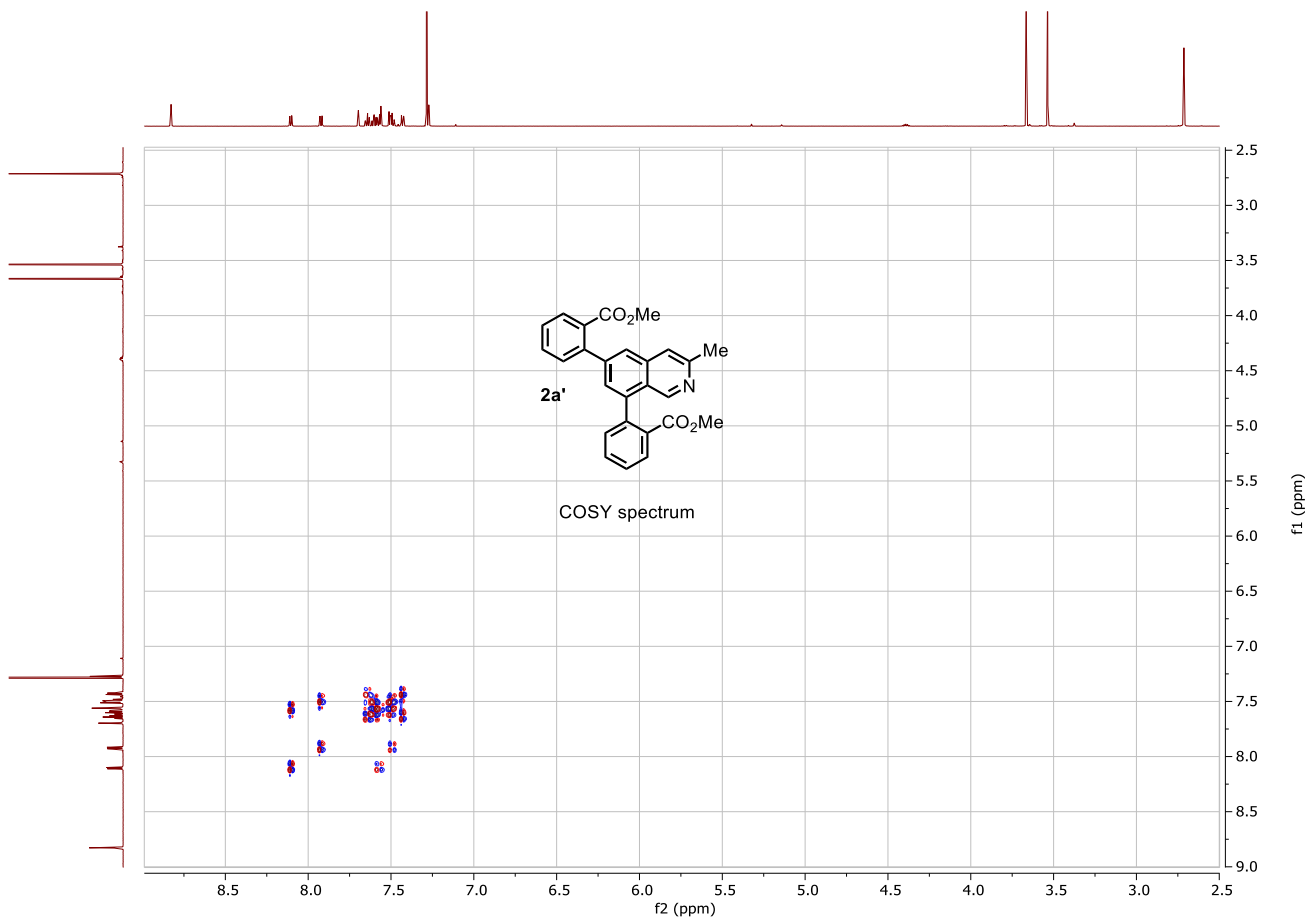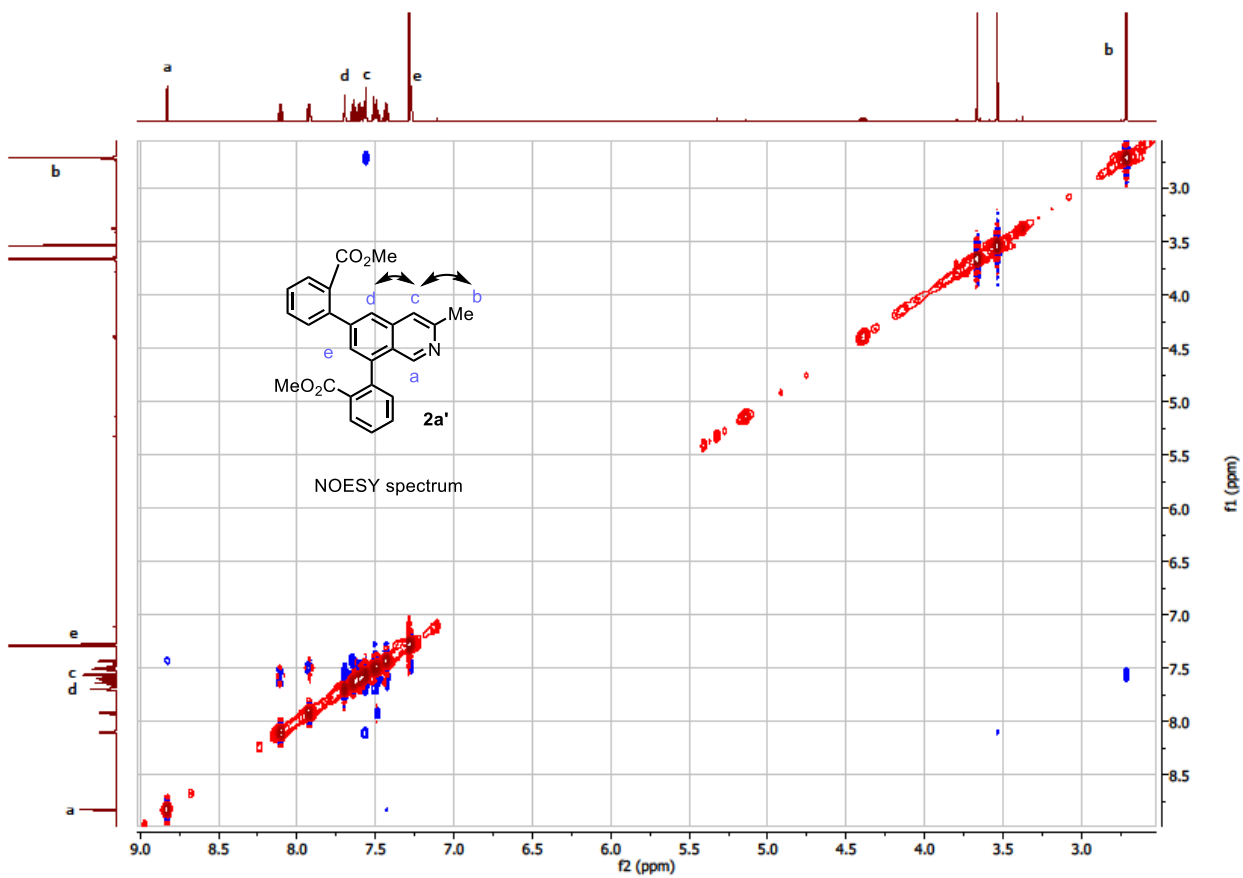

8.126  
8.124  
8.113  
8.110  
7.876  
7.874  
7.864  
7.861  
7.850  
7.848  
7.837  
7.835  
7.780  
7.777  
7.767  
7.764  
7.754  
7.751  
7.704  
7.702  
7.692  
7.690  
7.679  
7.677  
7.623  
7.620  
7.610  
7.608  
7.597  
7.595  
7.494  
7.492  
7.481  
7.479  
7.468  
7.466  
7.399  
7.397  
7.386  
7.384  
7.151  
7.138  
7.107  
7.104  
7.094  
7.091  
7.036  
4.508  
3.701  
3.691  
3.681  
3.008  
2.998

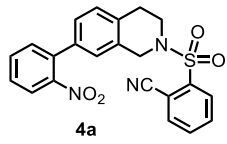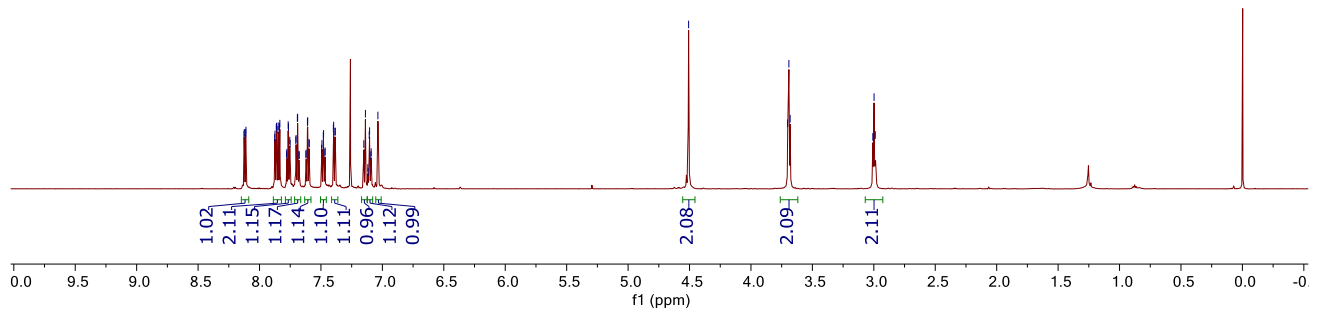

149.20  
140.90  
135.87  
135.77  
135.73  
133.32  
133.07  
132.91  
132.51  
131.99  
131.91  
130.42  
129.42  
128.42  
126.67  
125.86  
124.24  
116.35  
110.94

77.33  
77.12  
76.91

47.29  
43.61

28.47

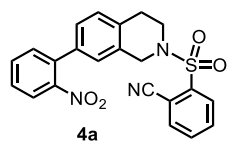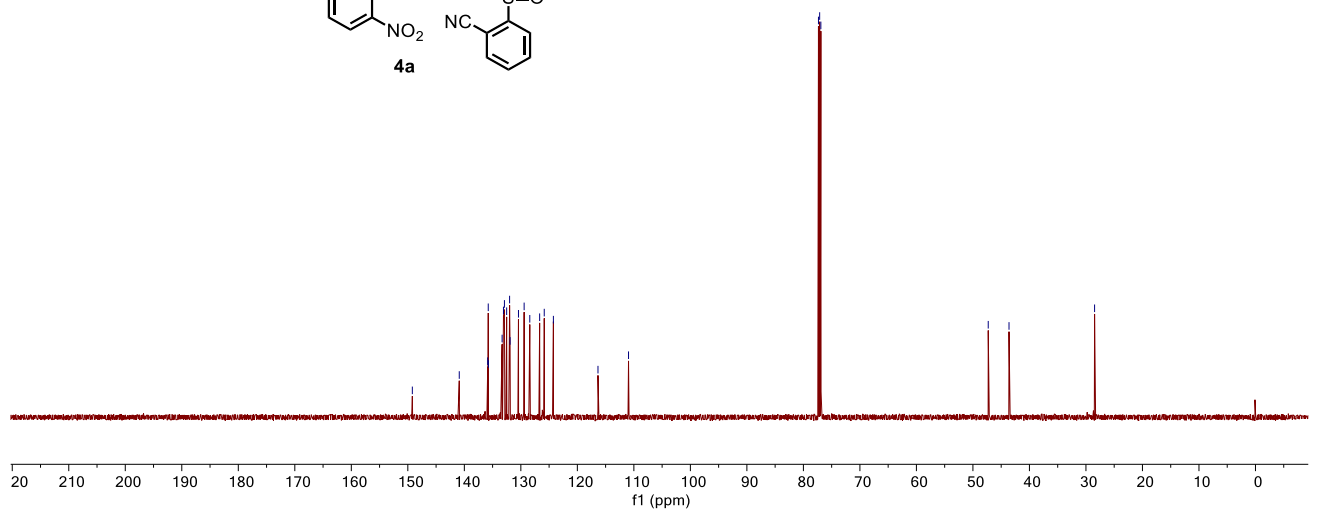



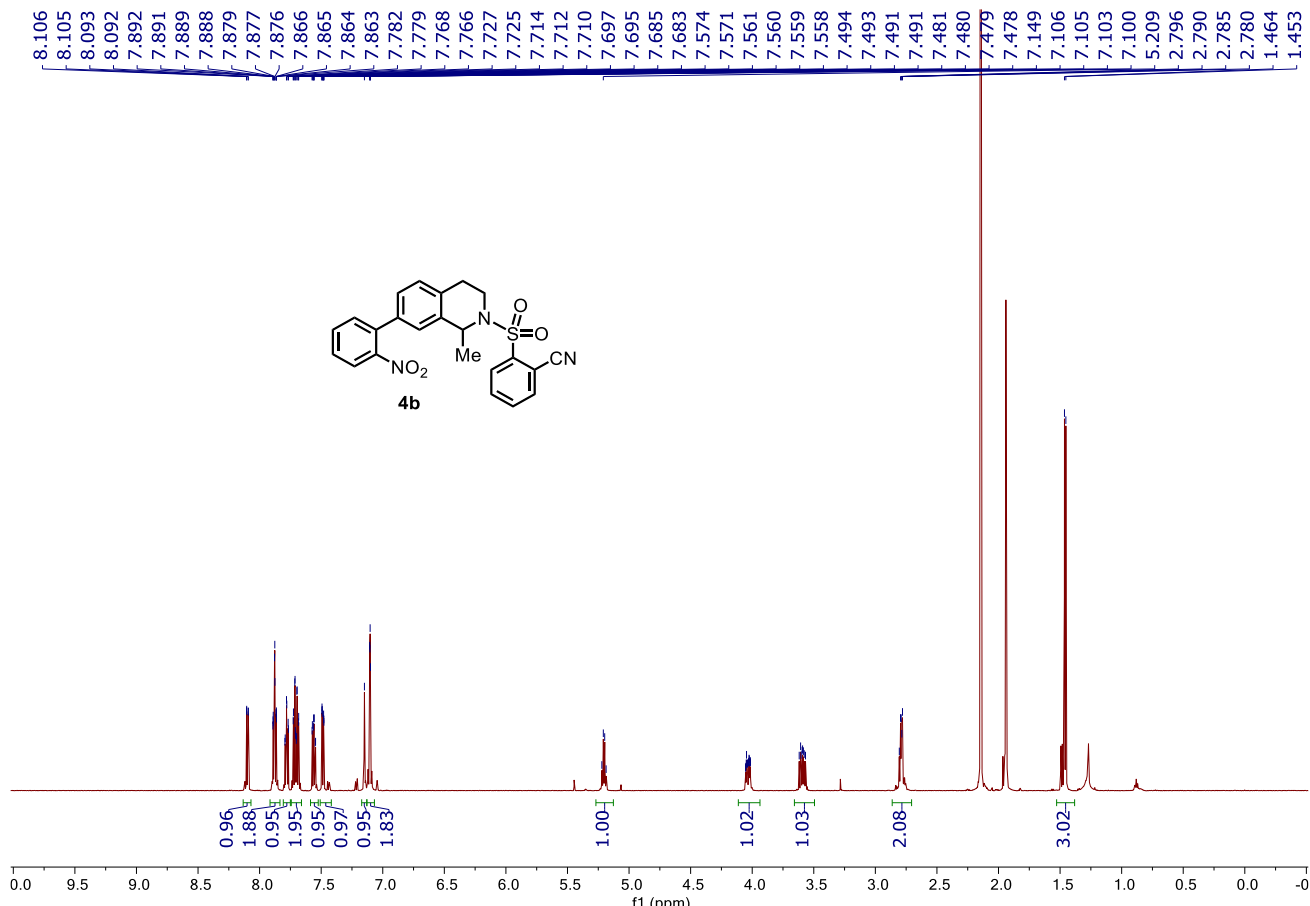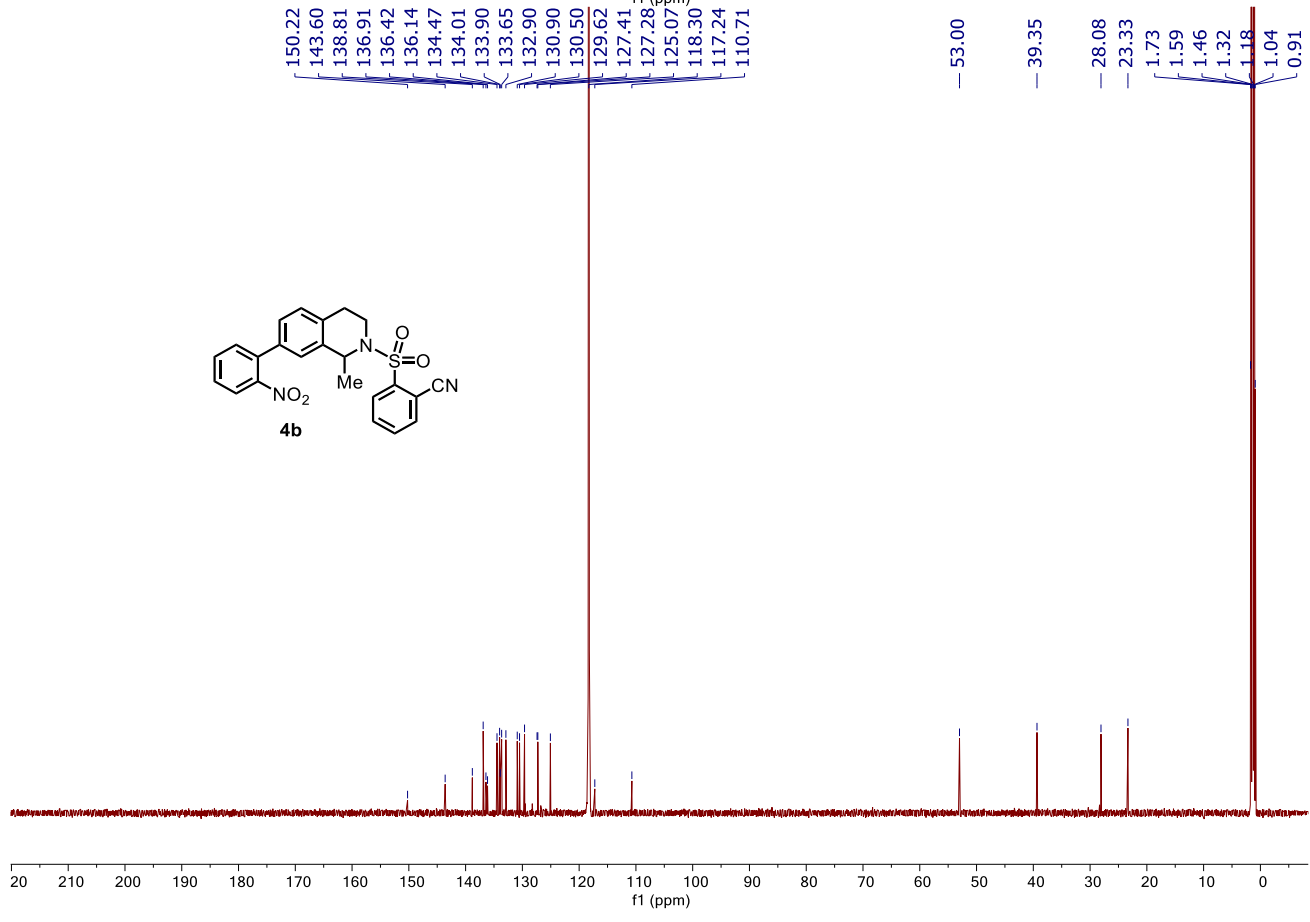

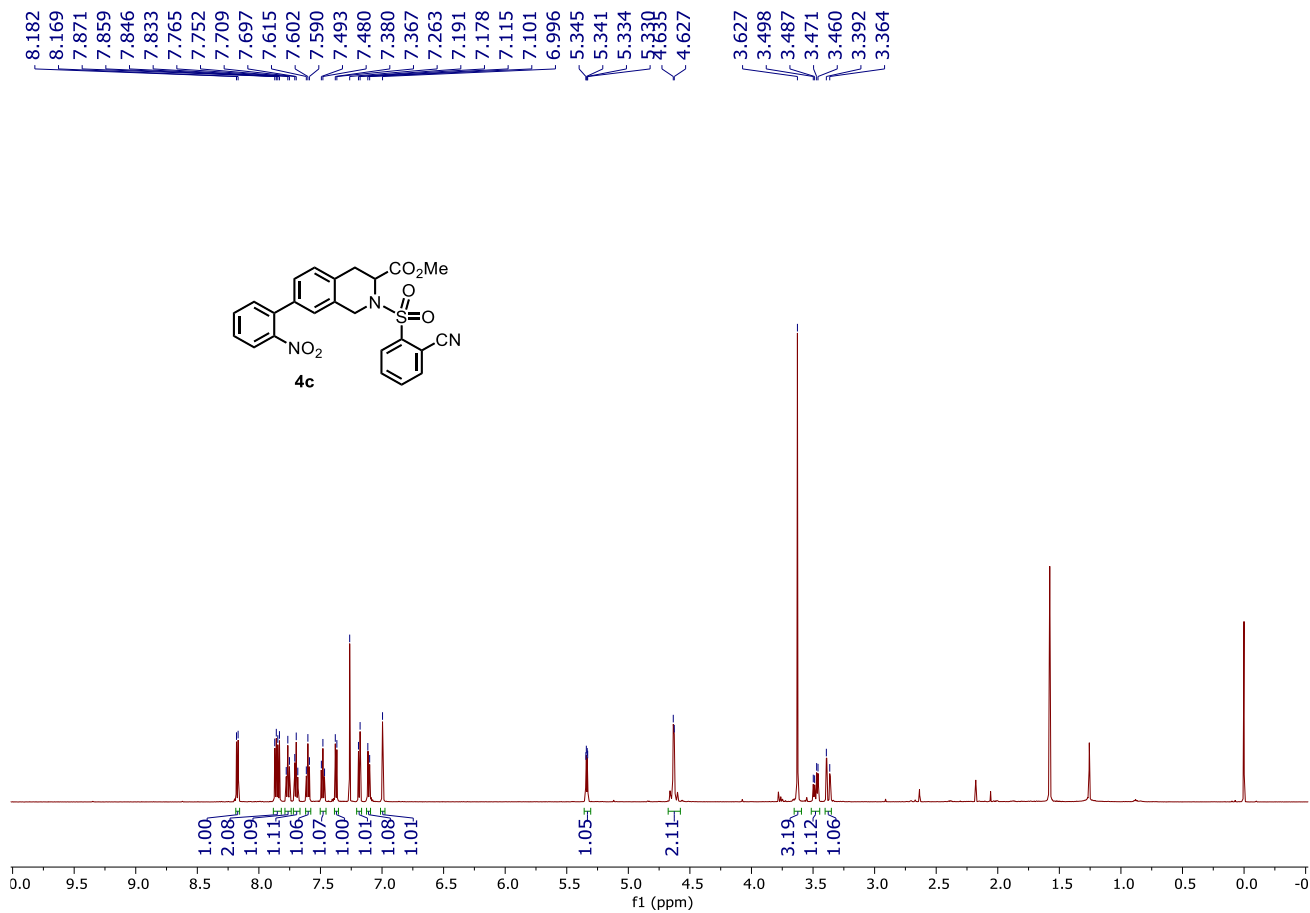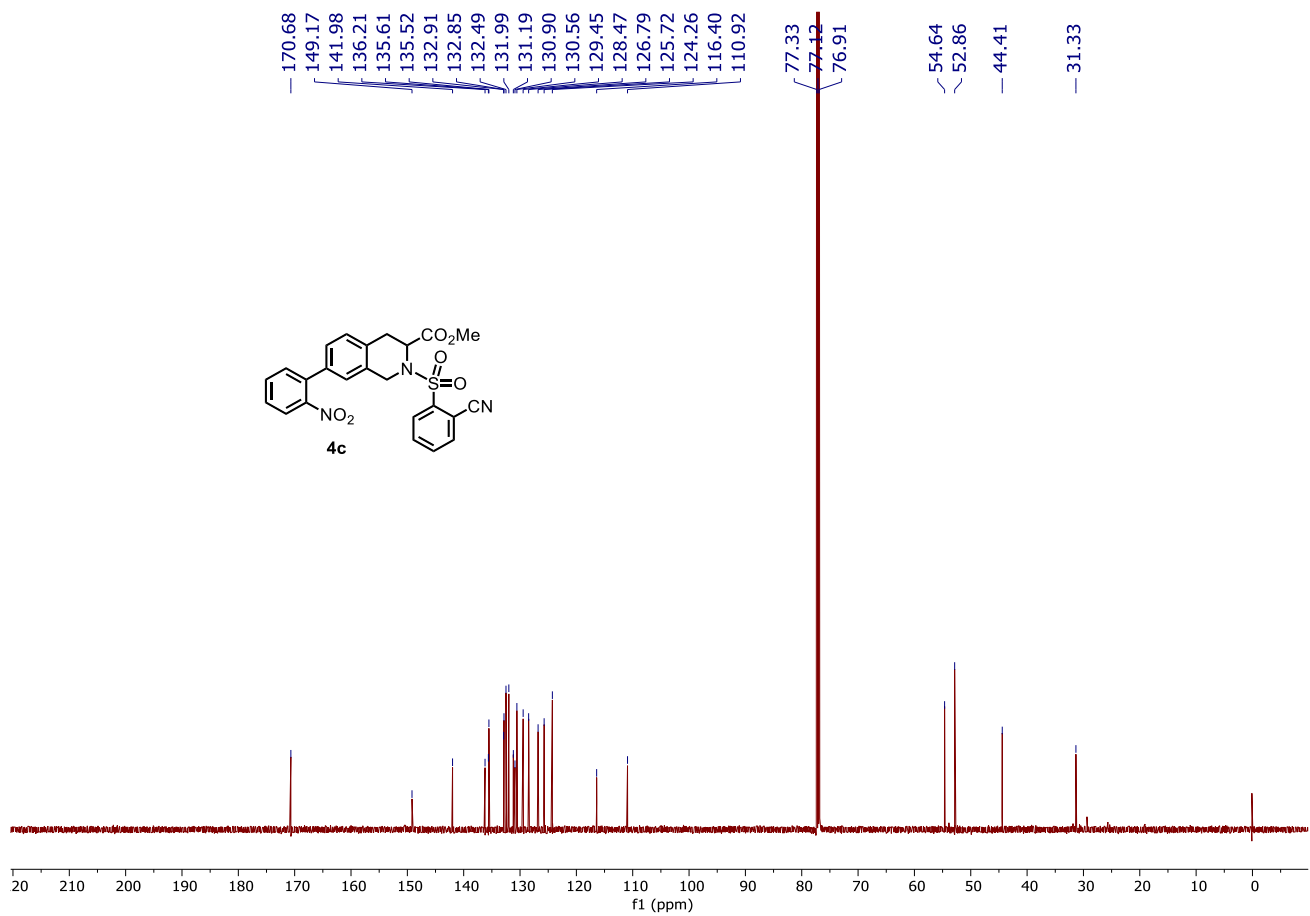

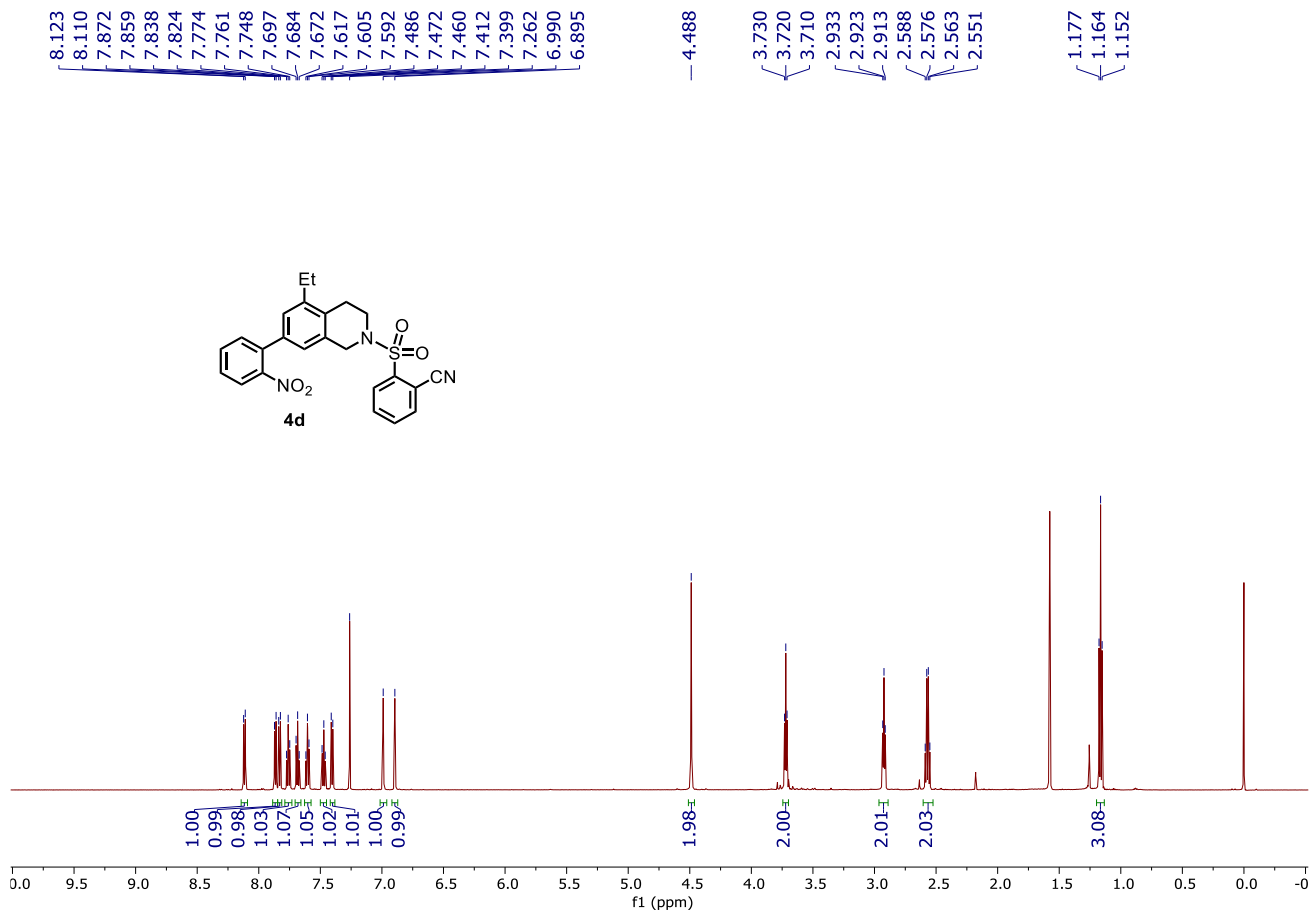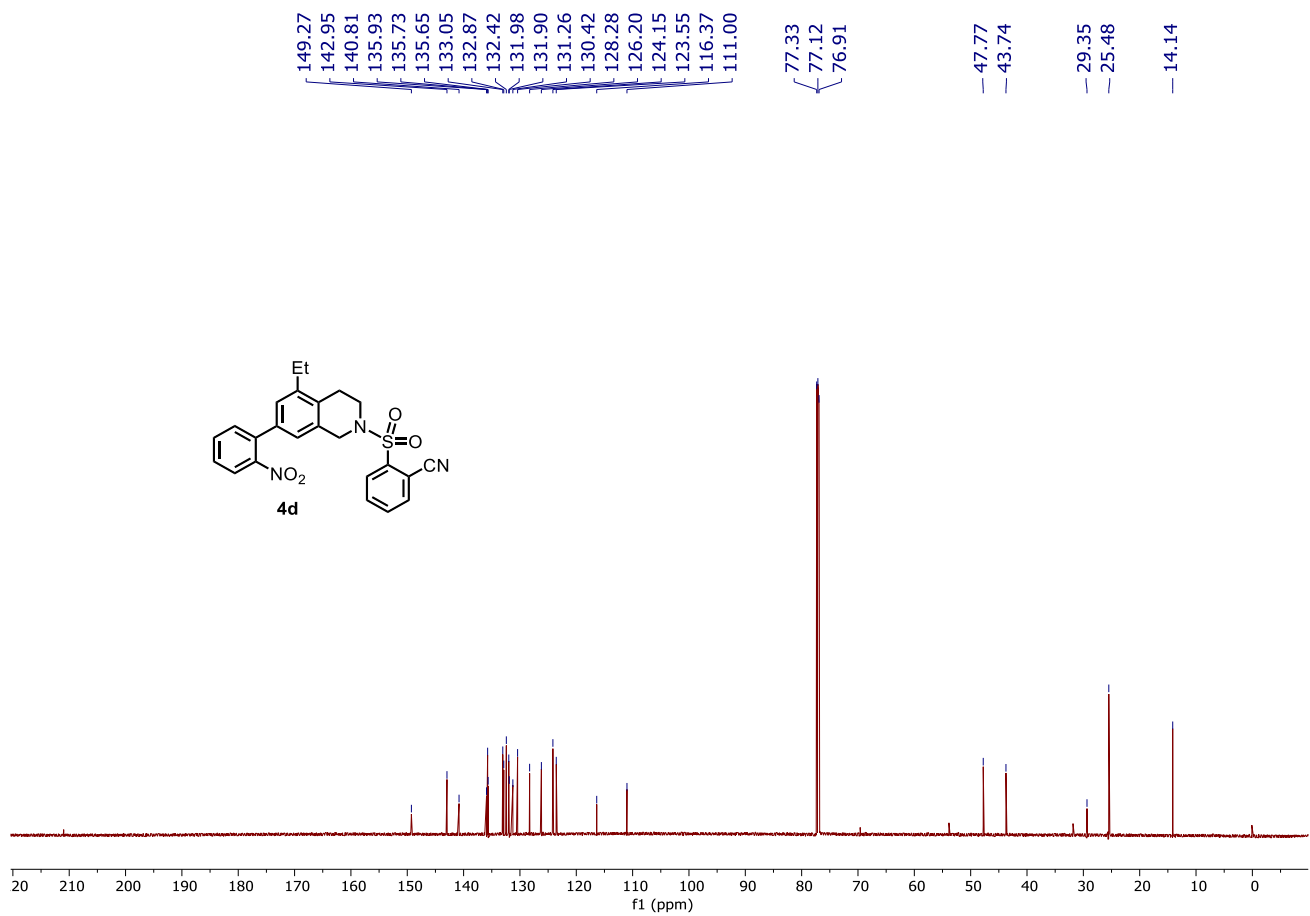

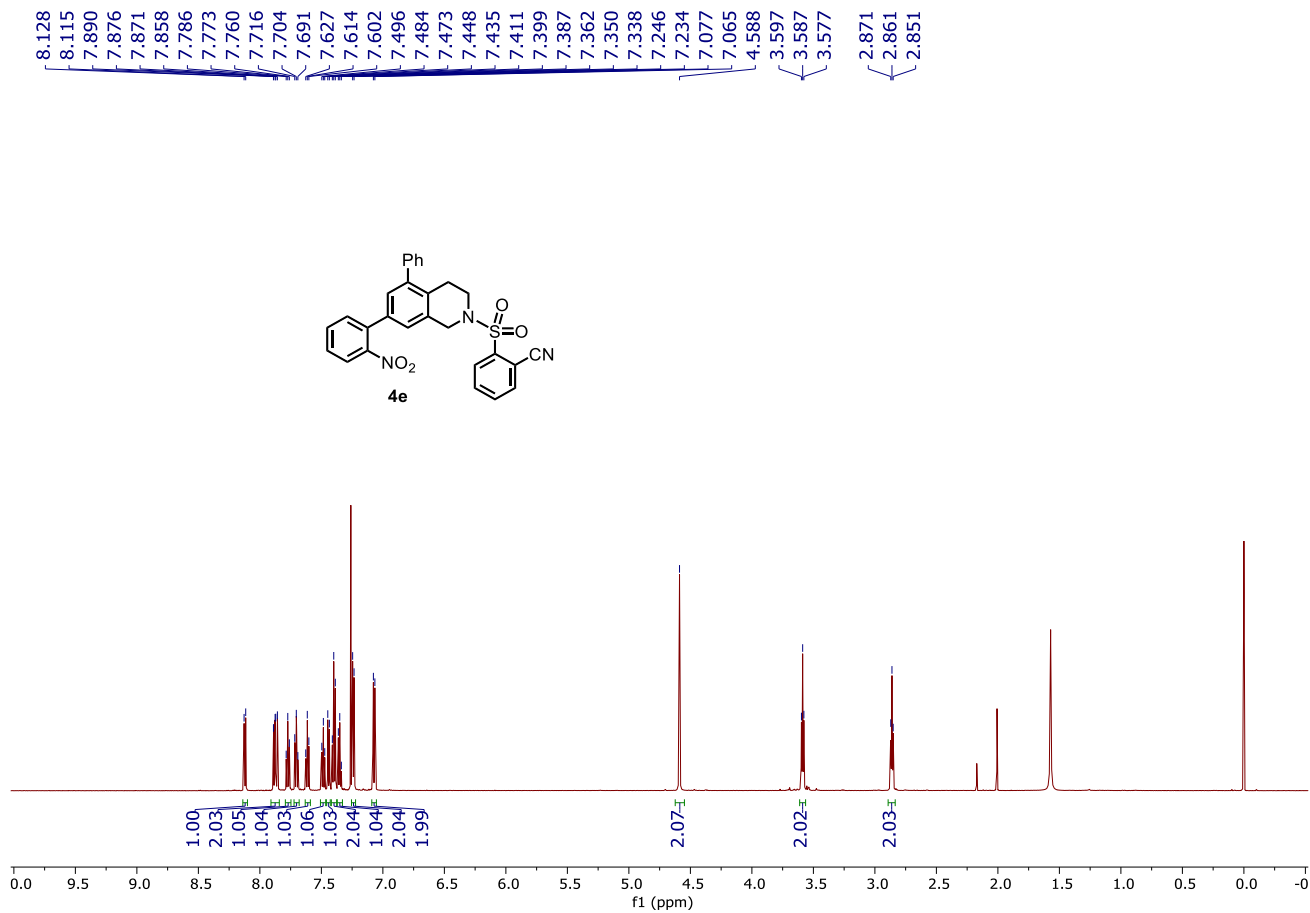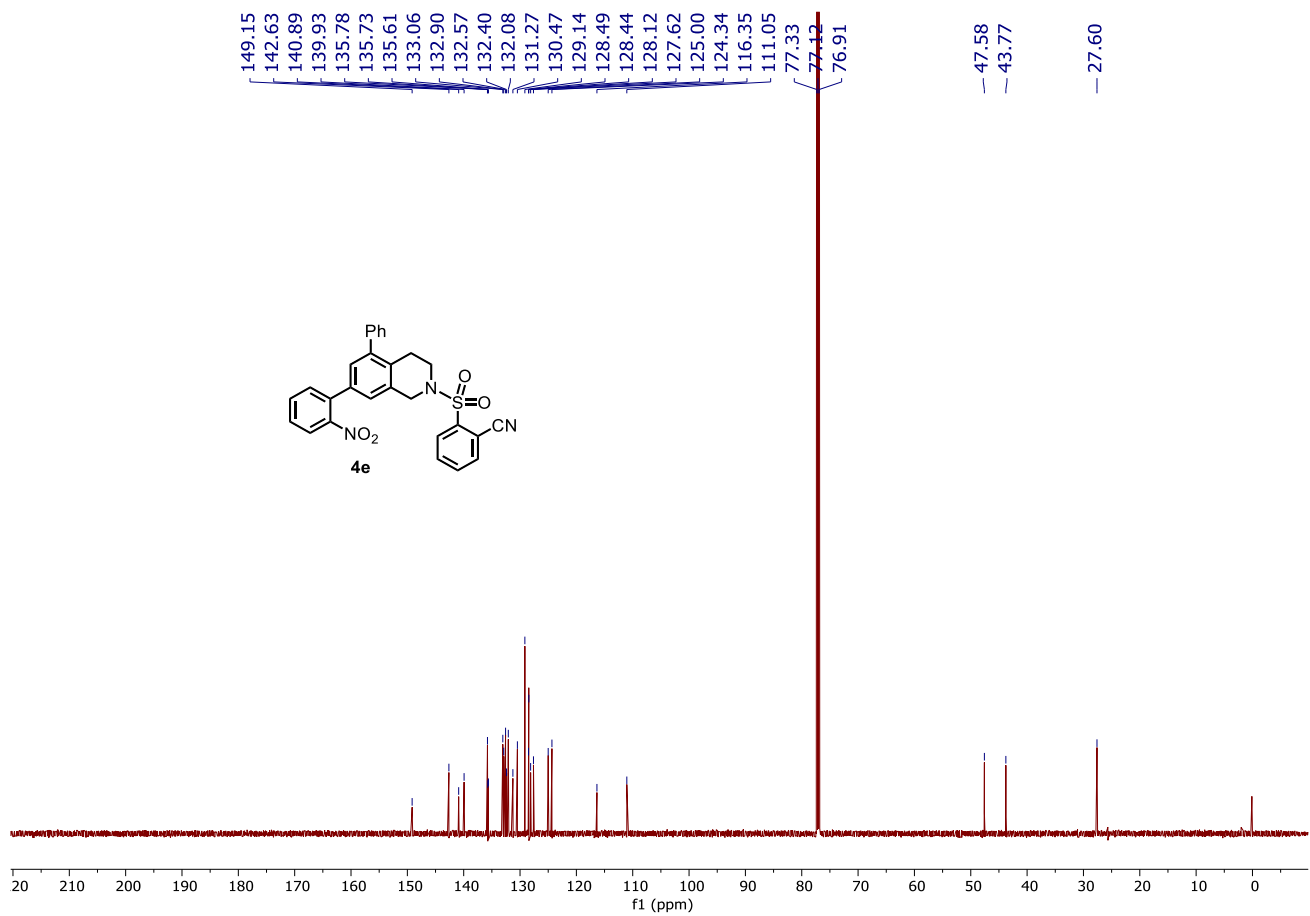

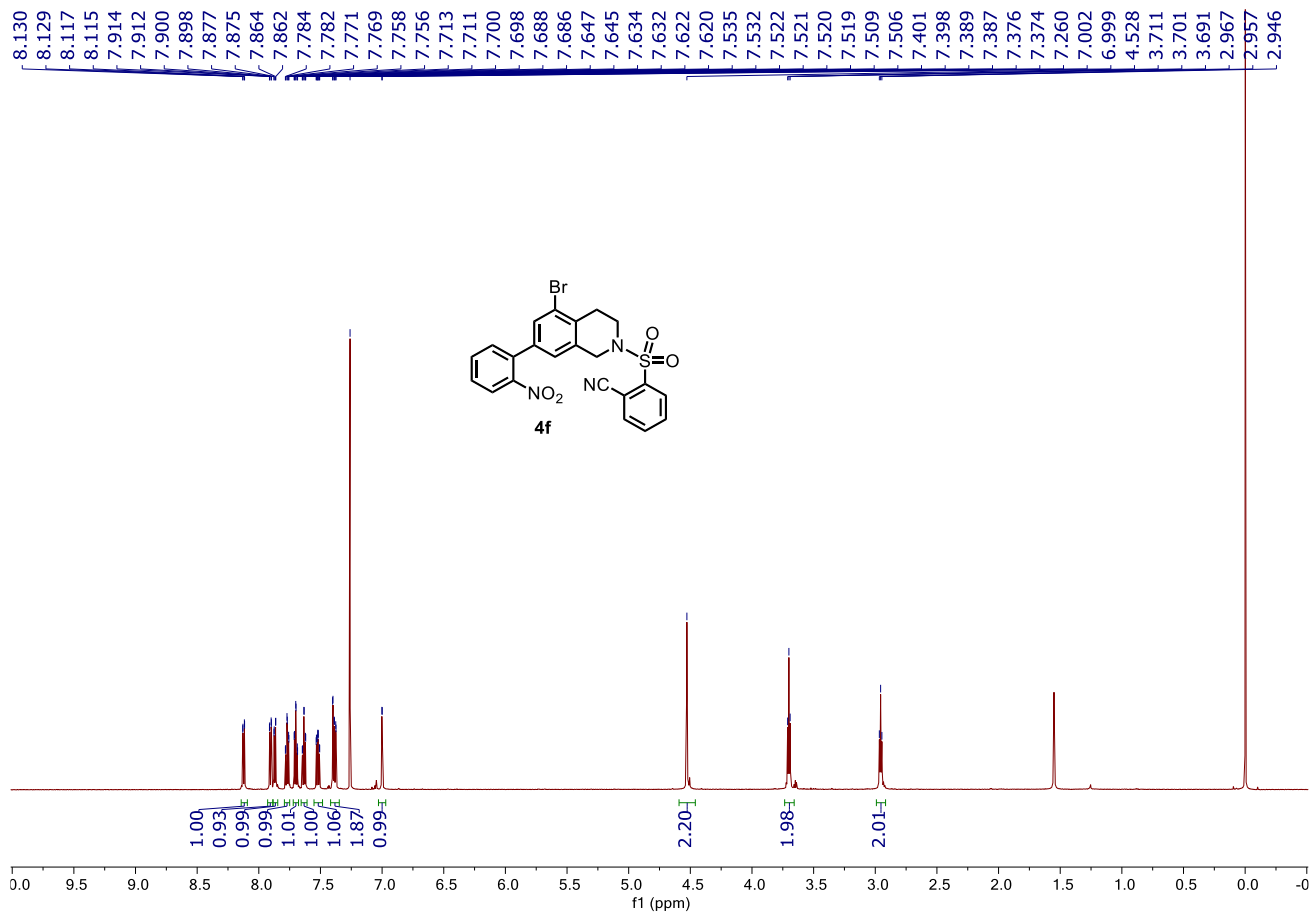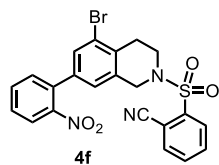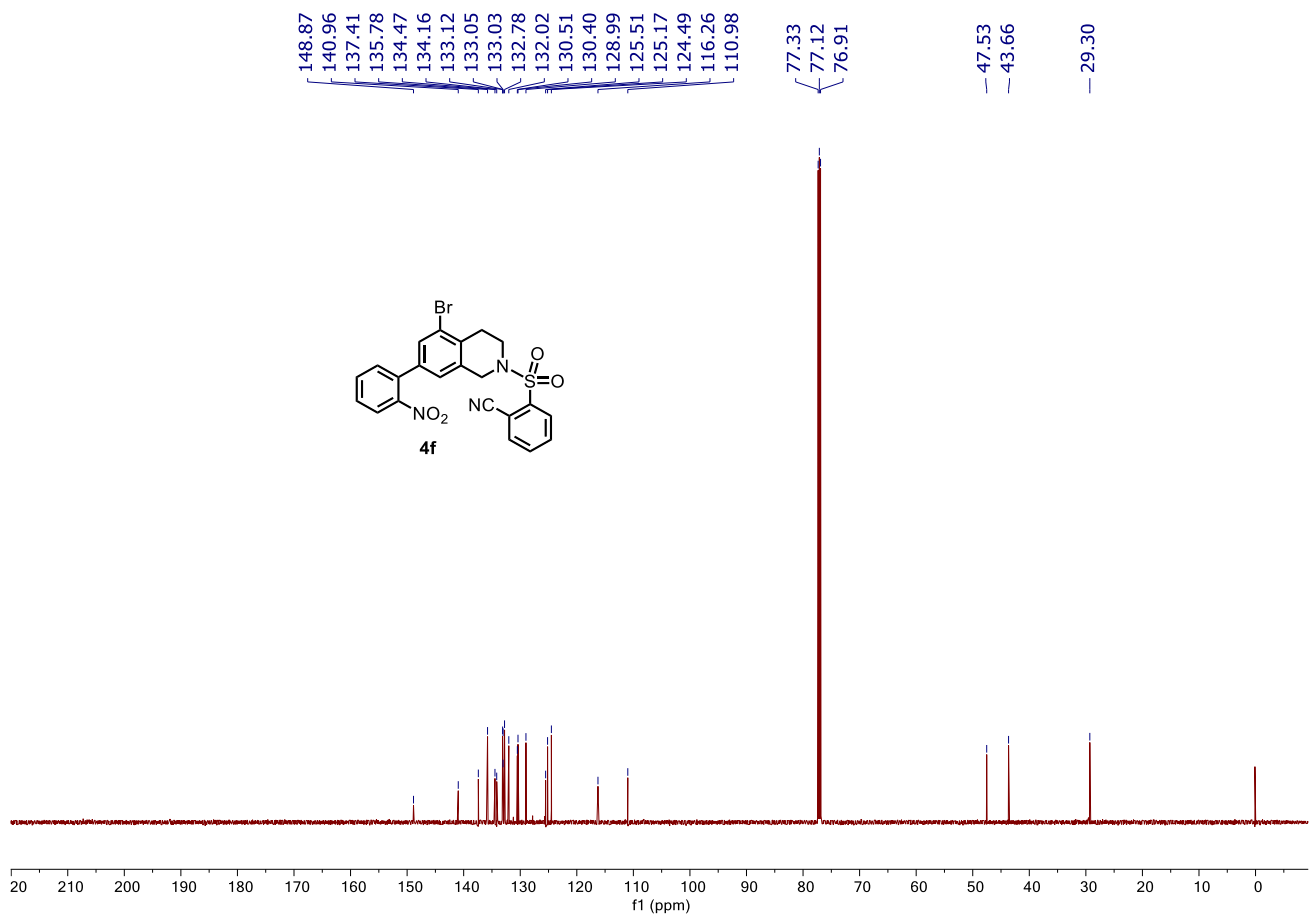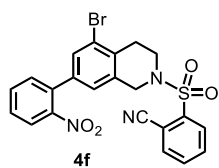

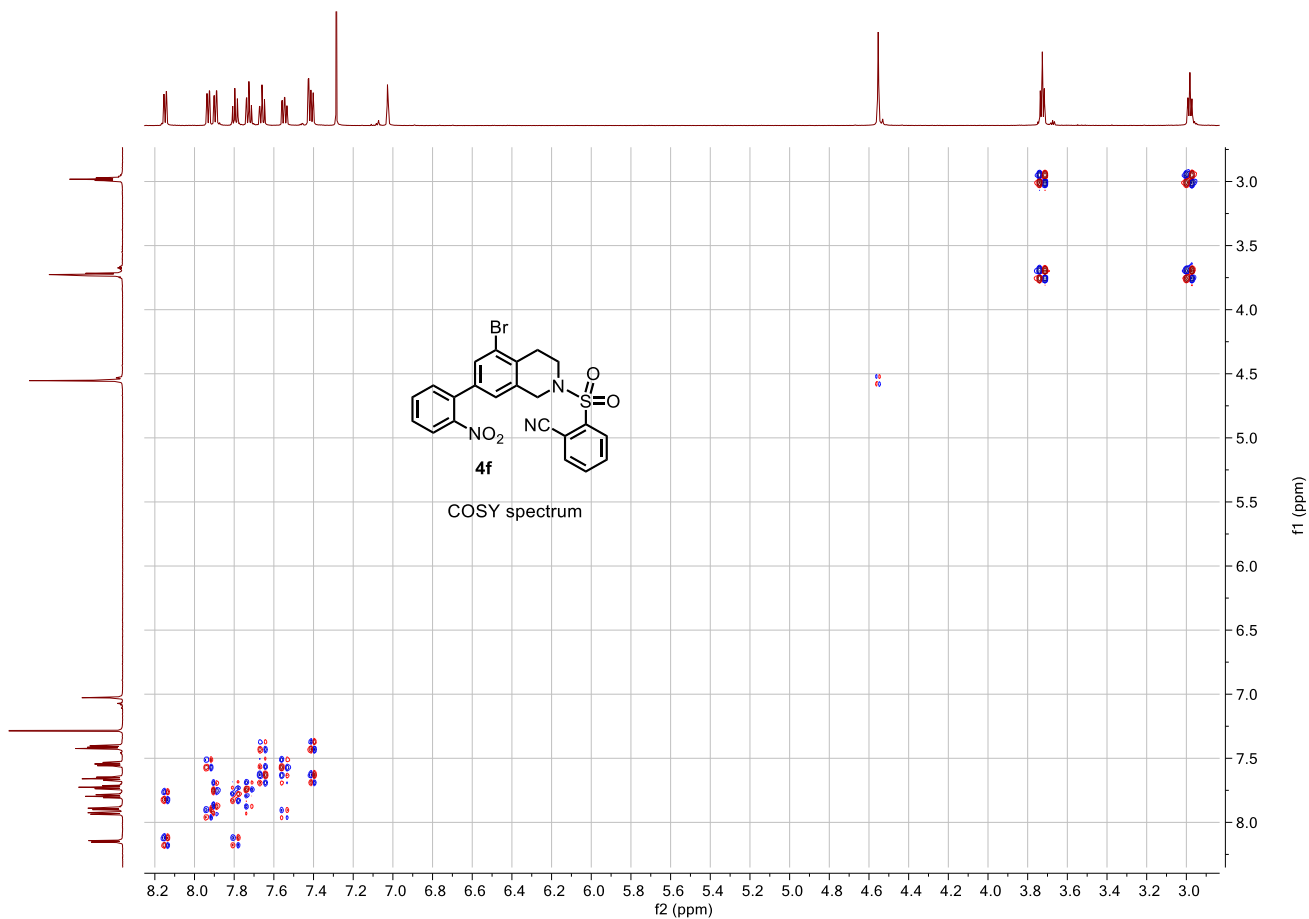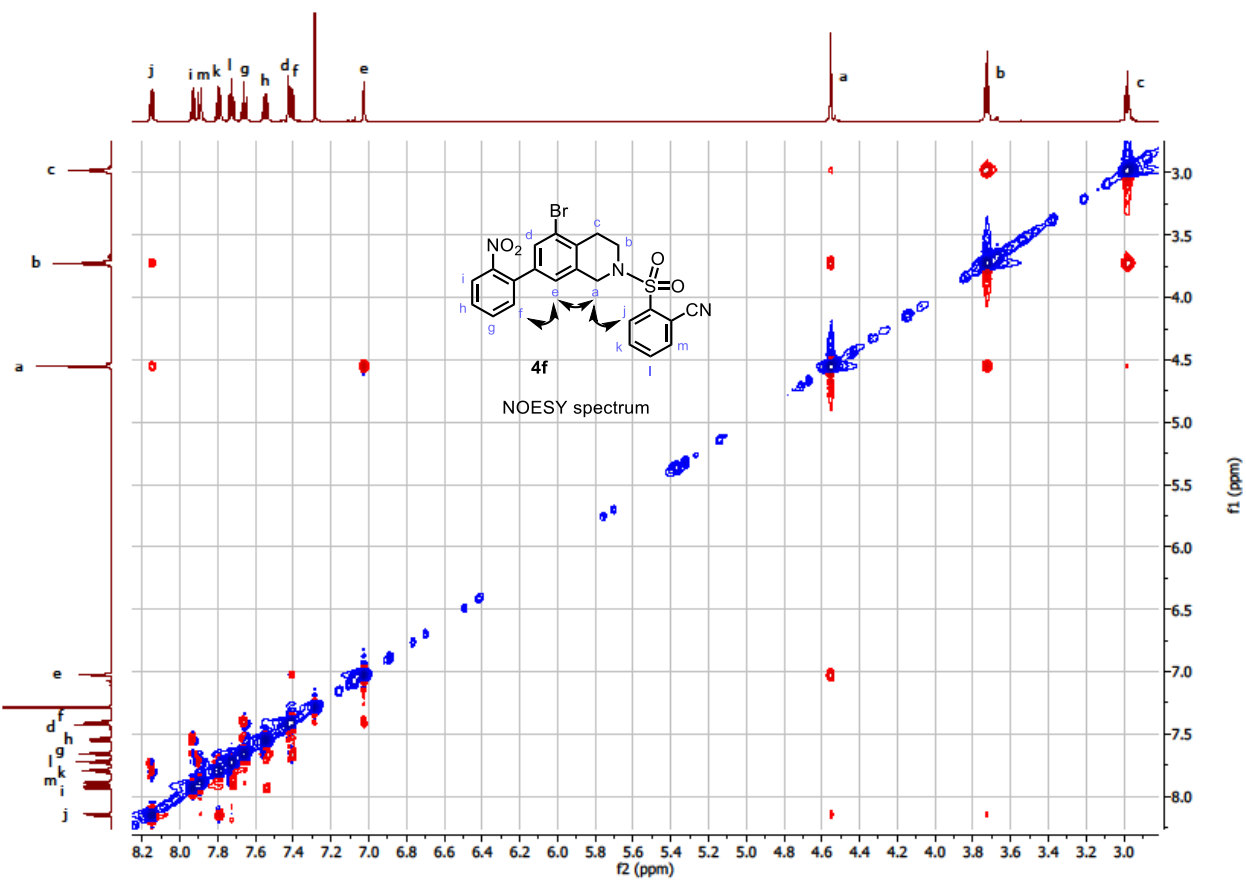

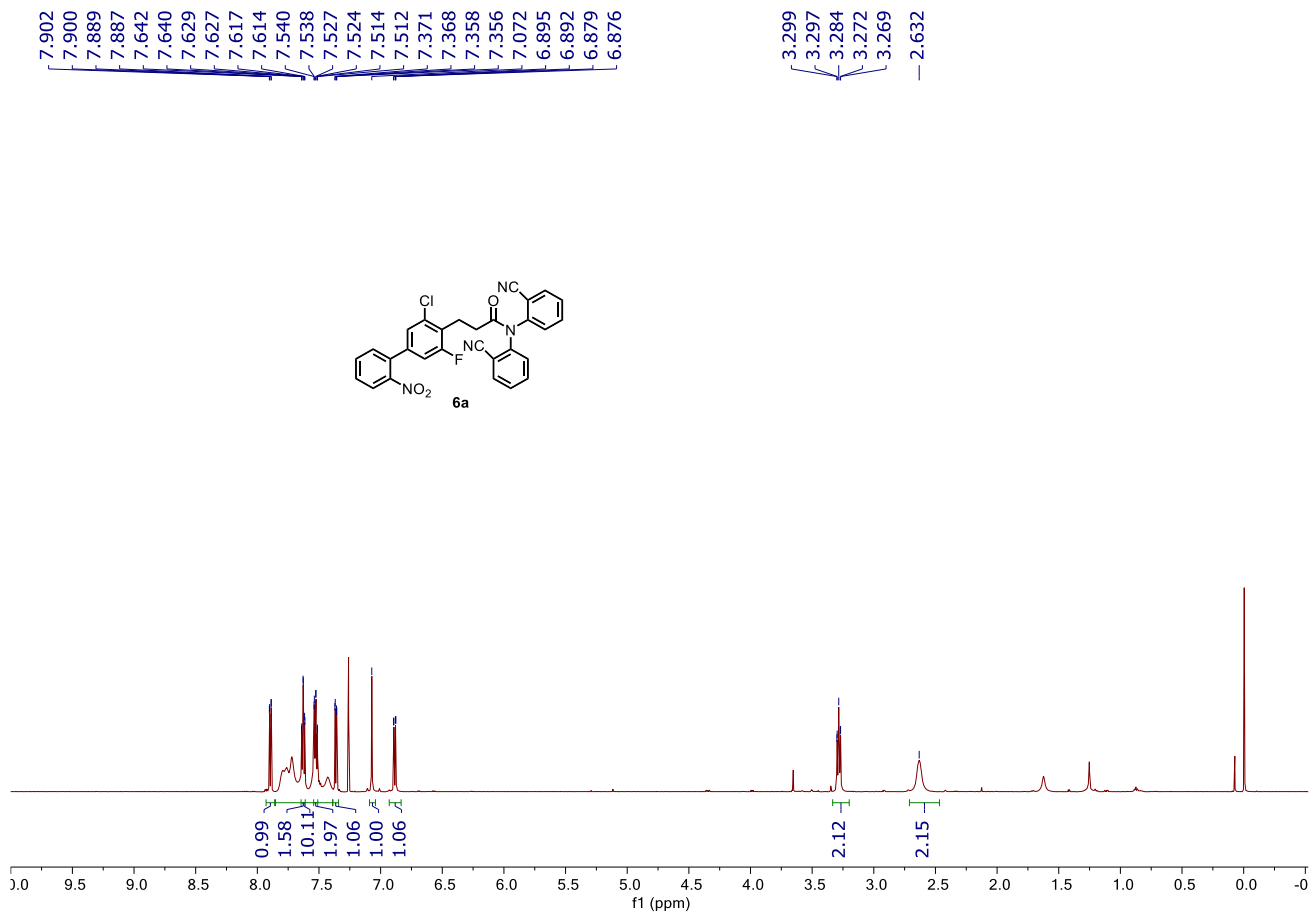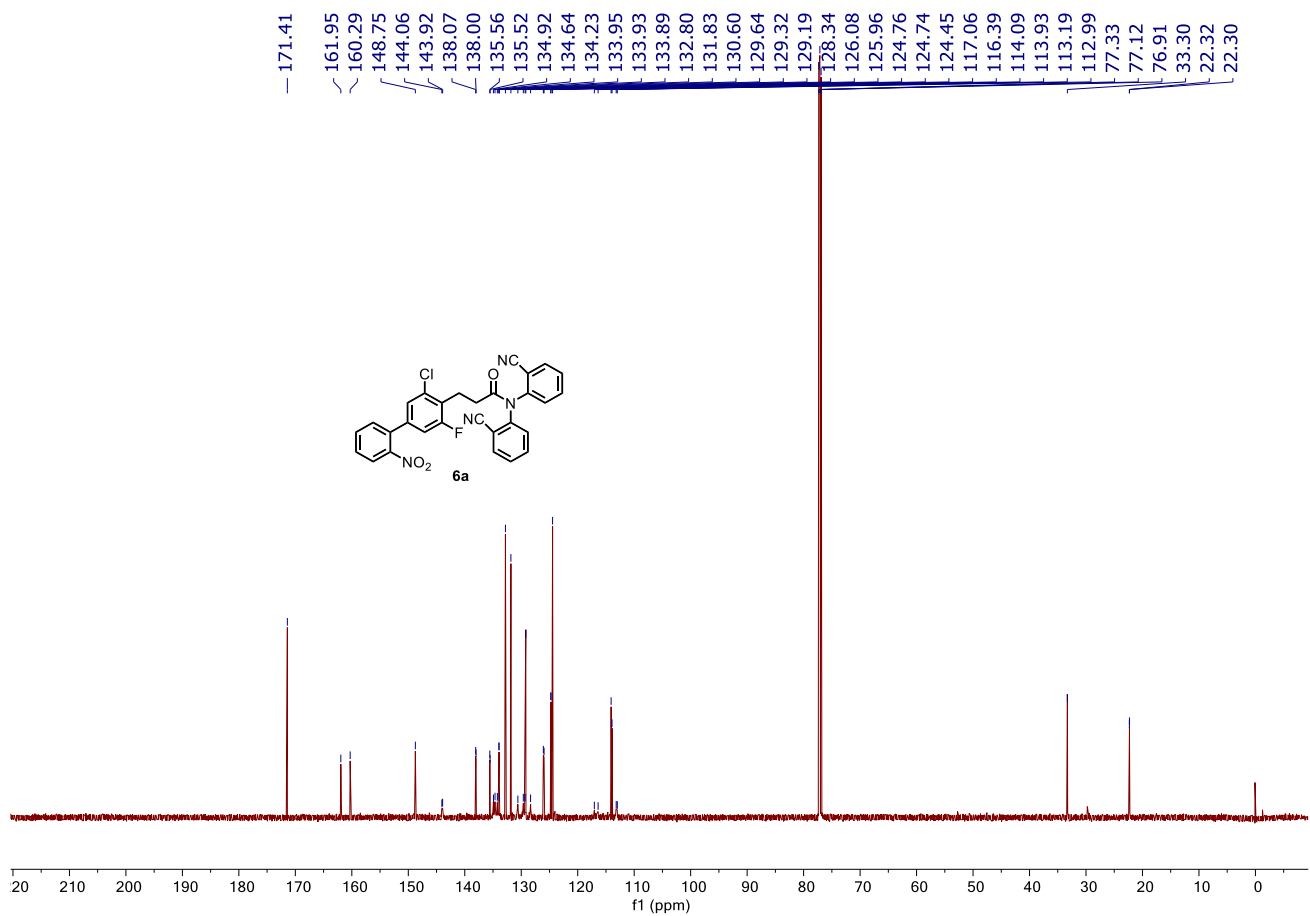

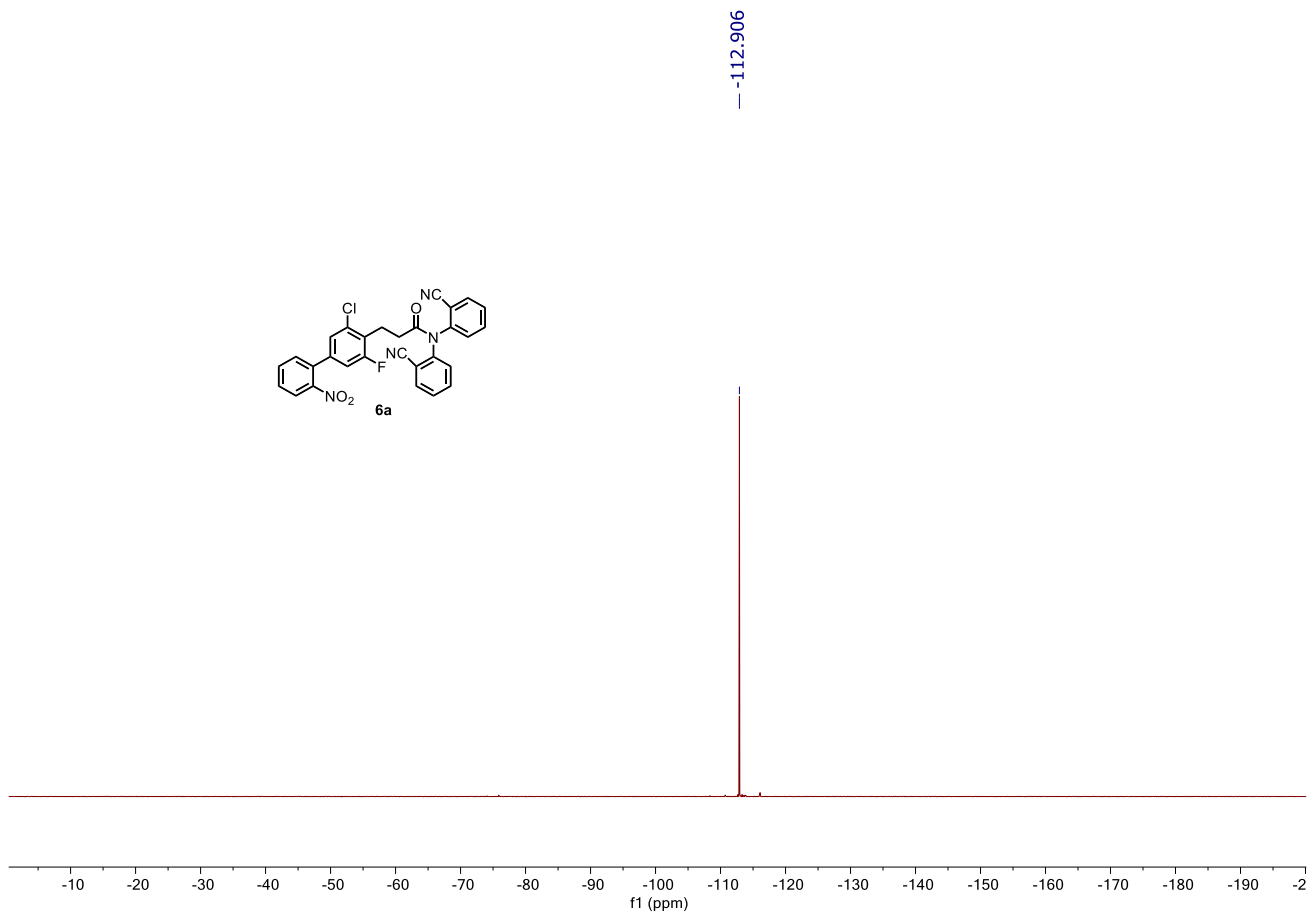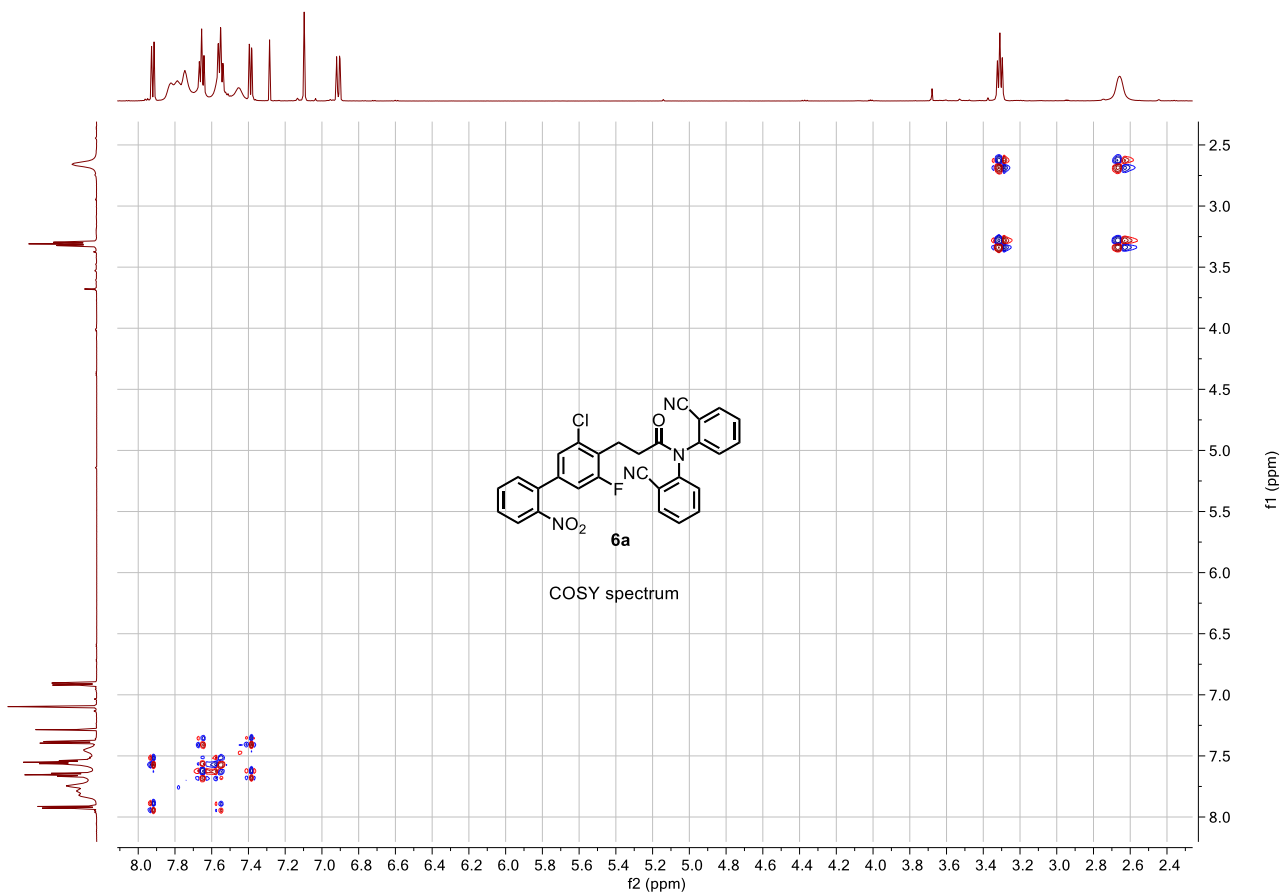



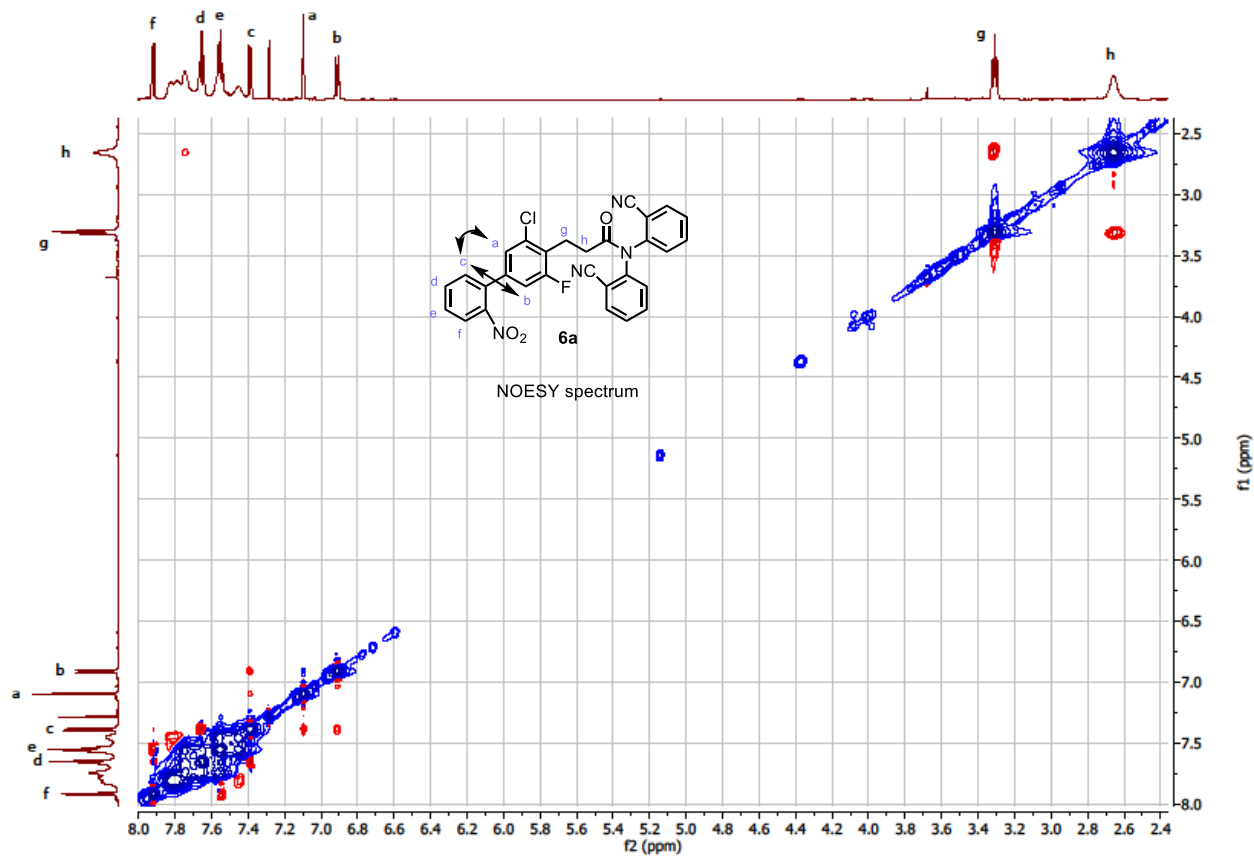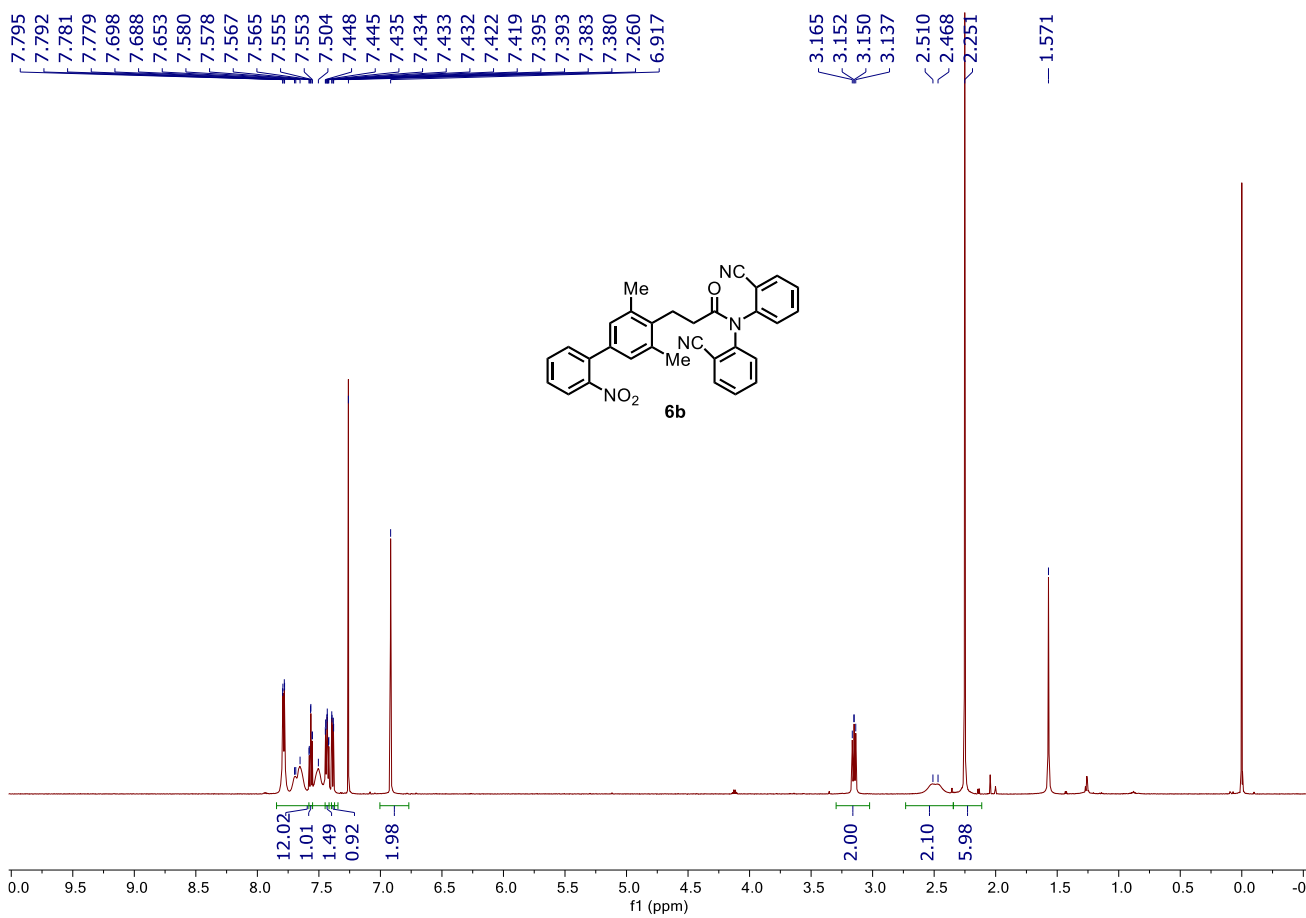

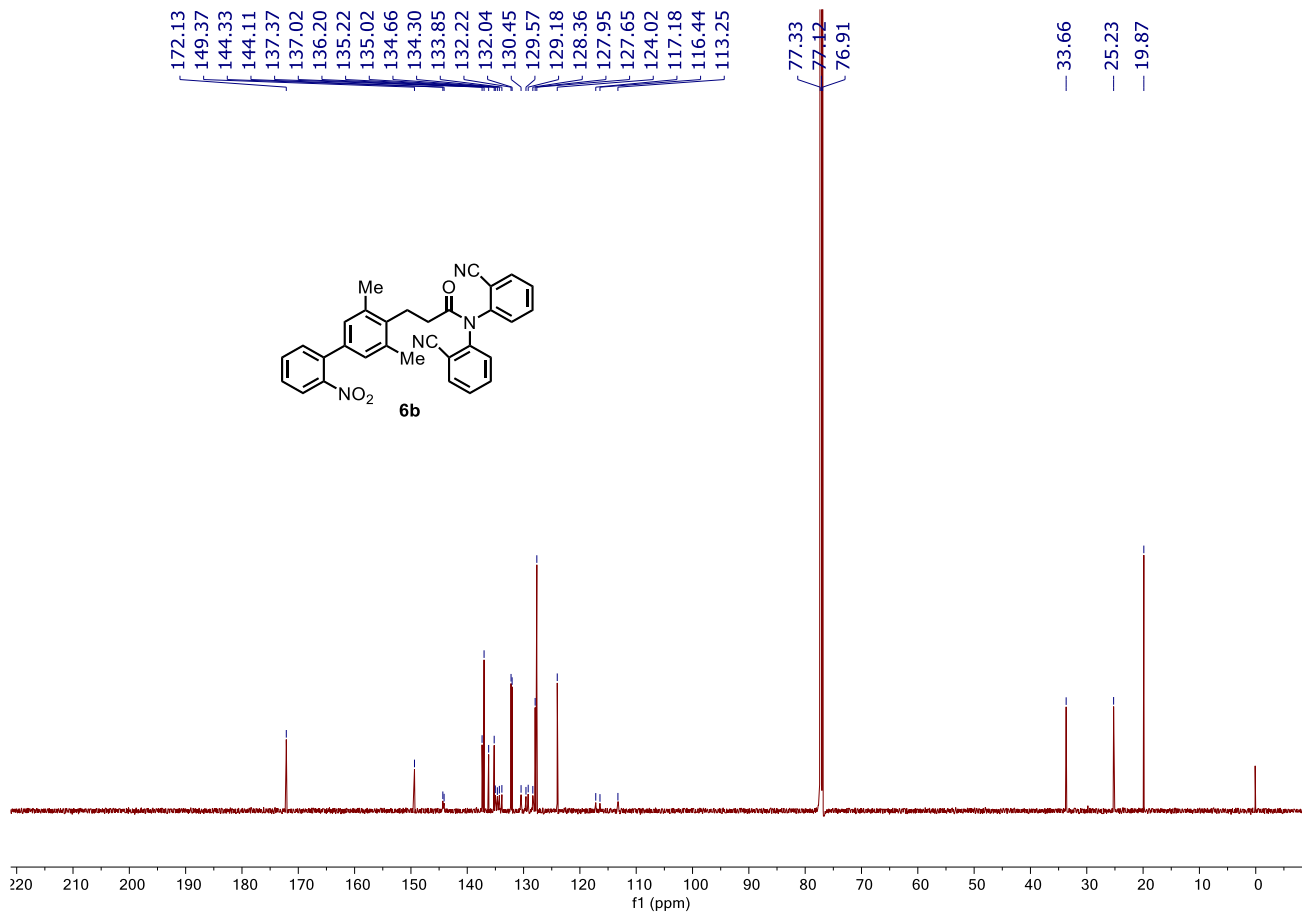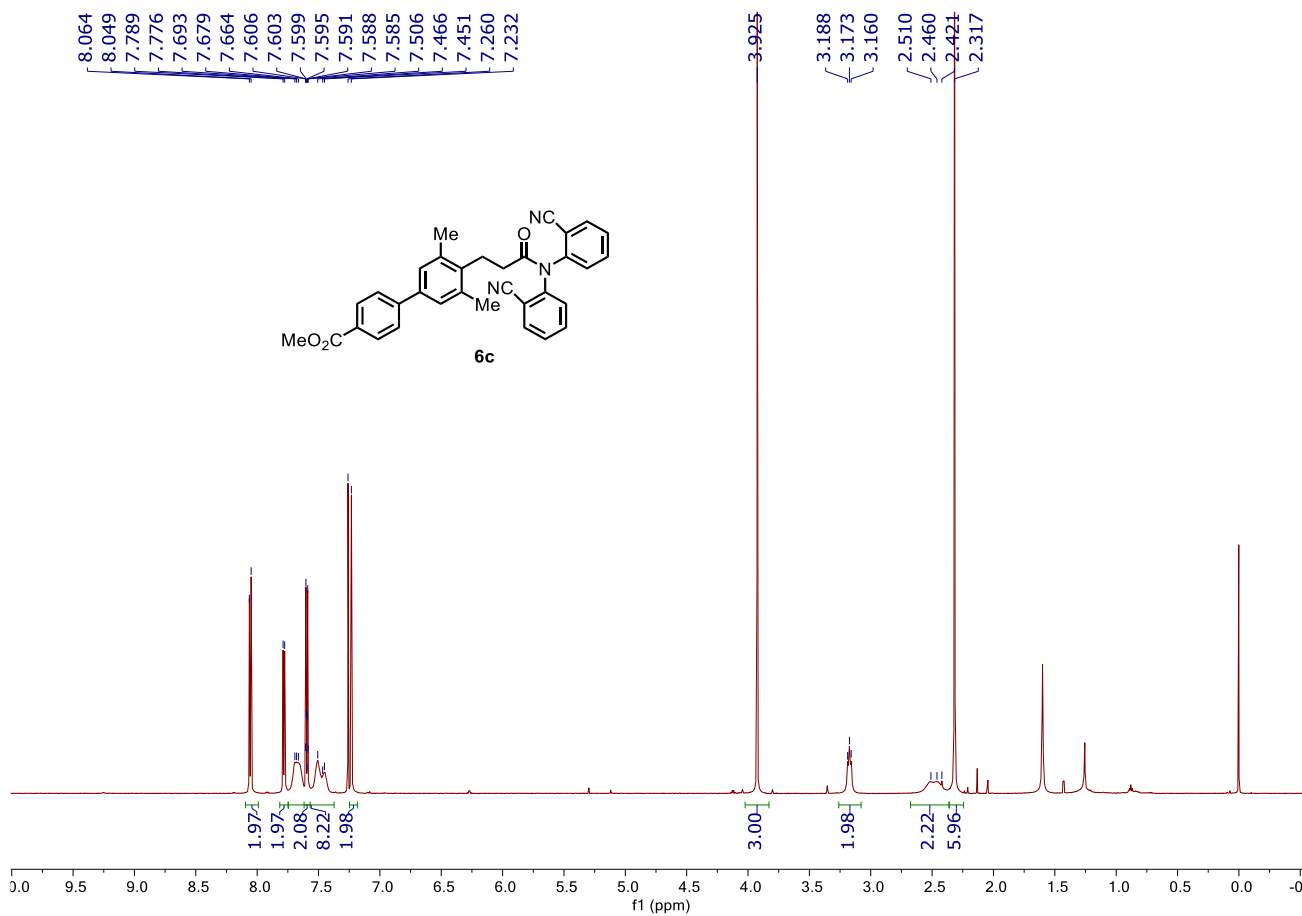

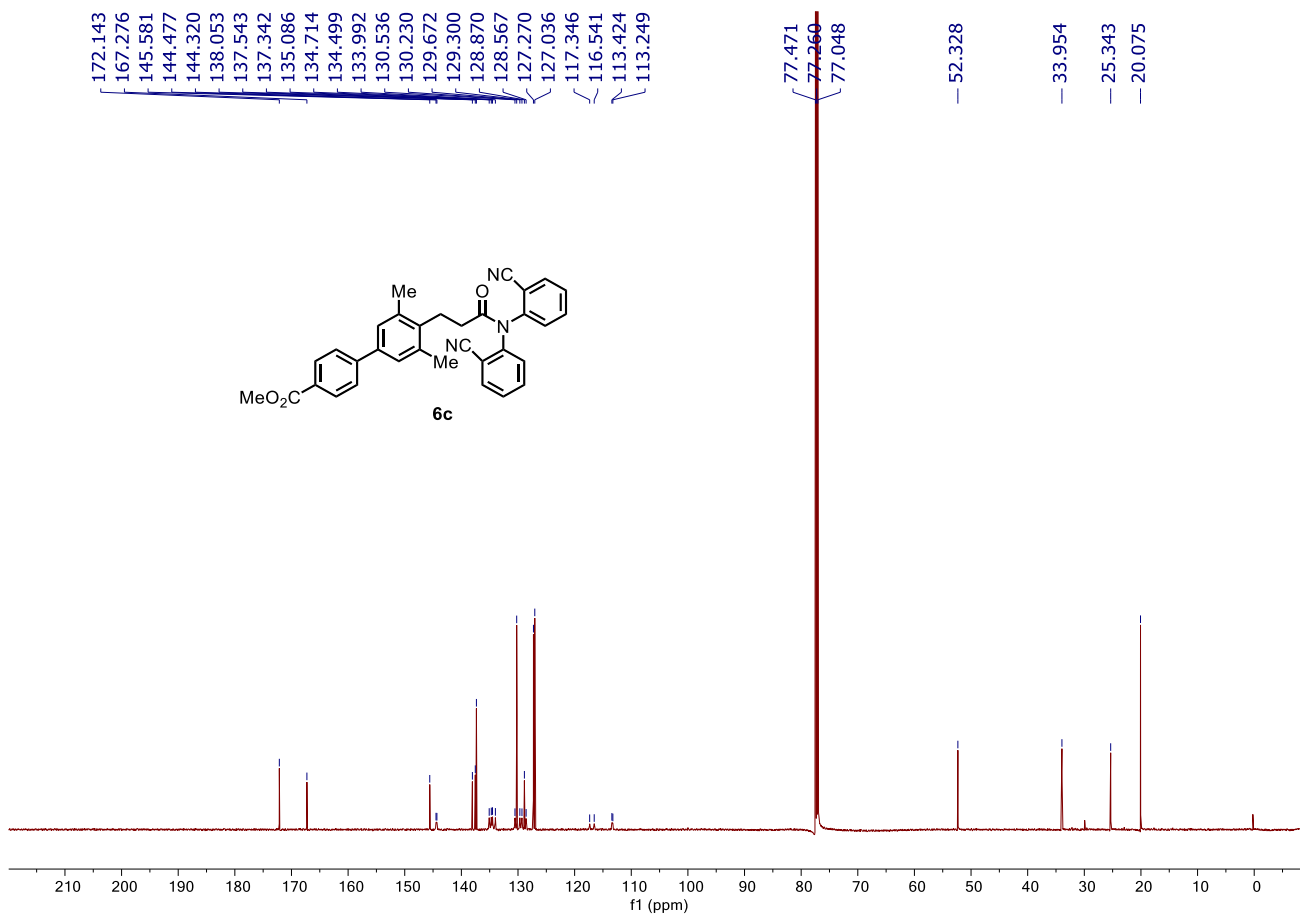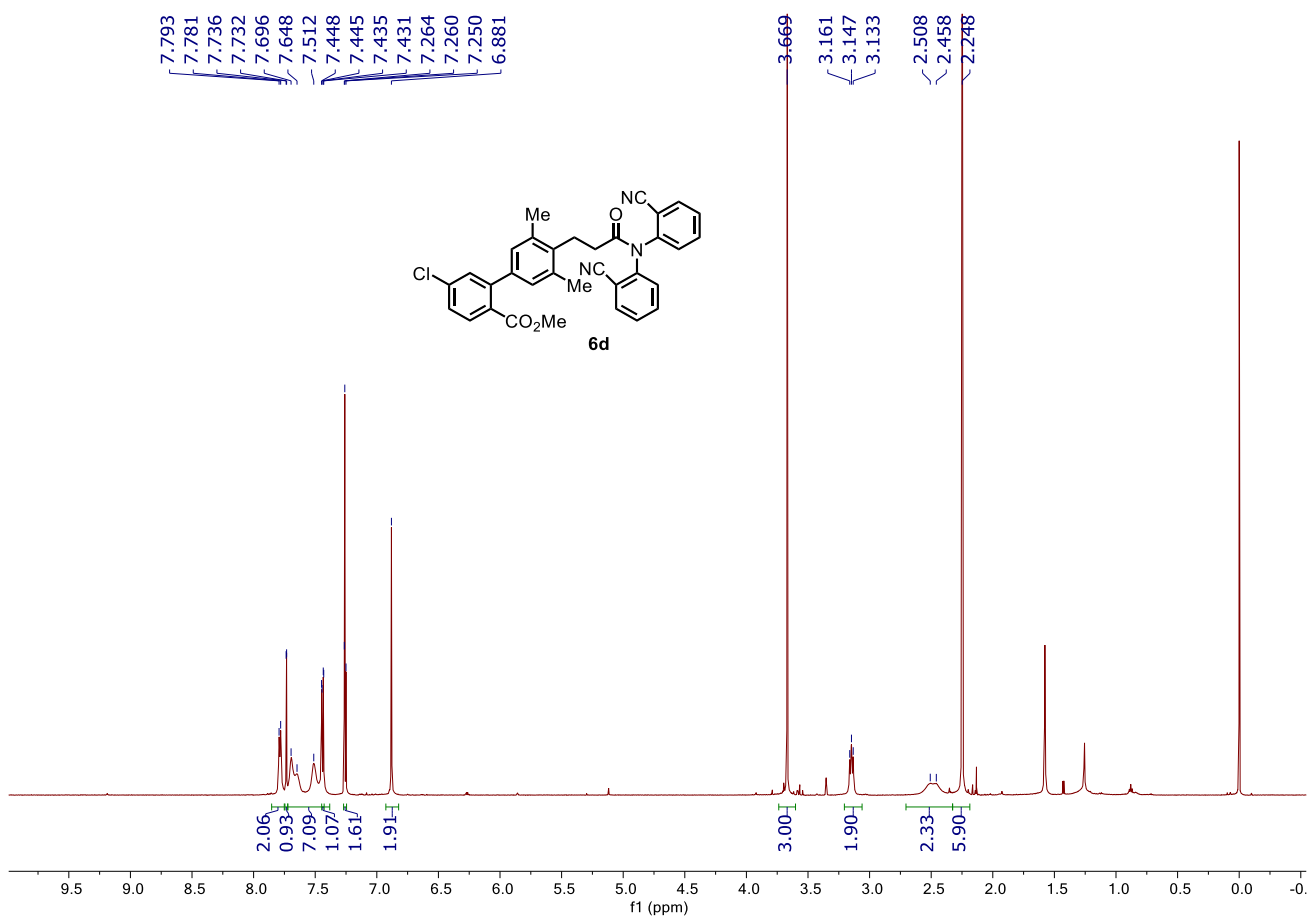

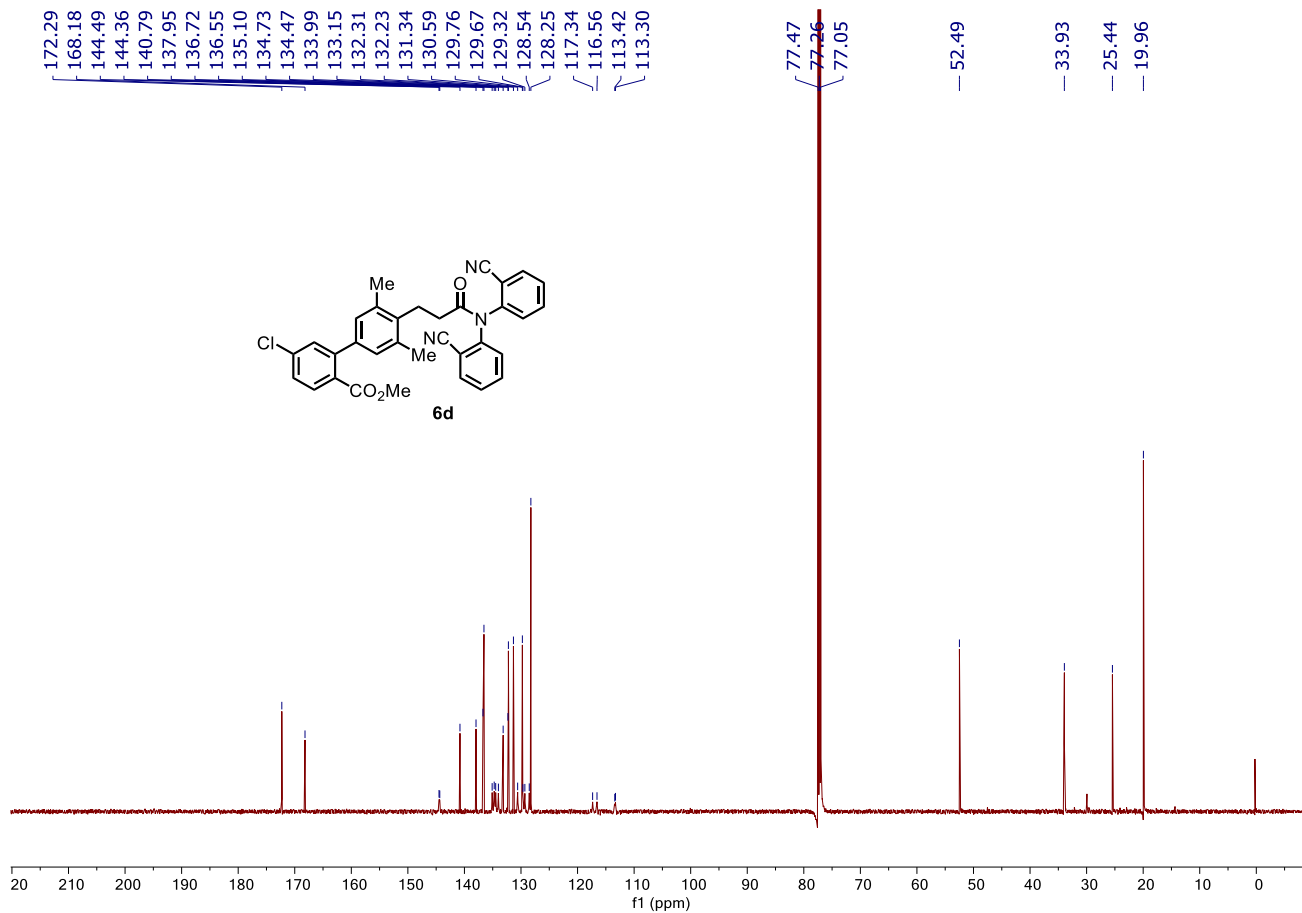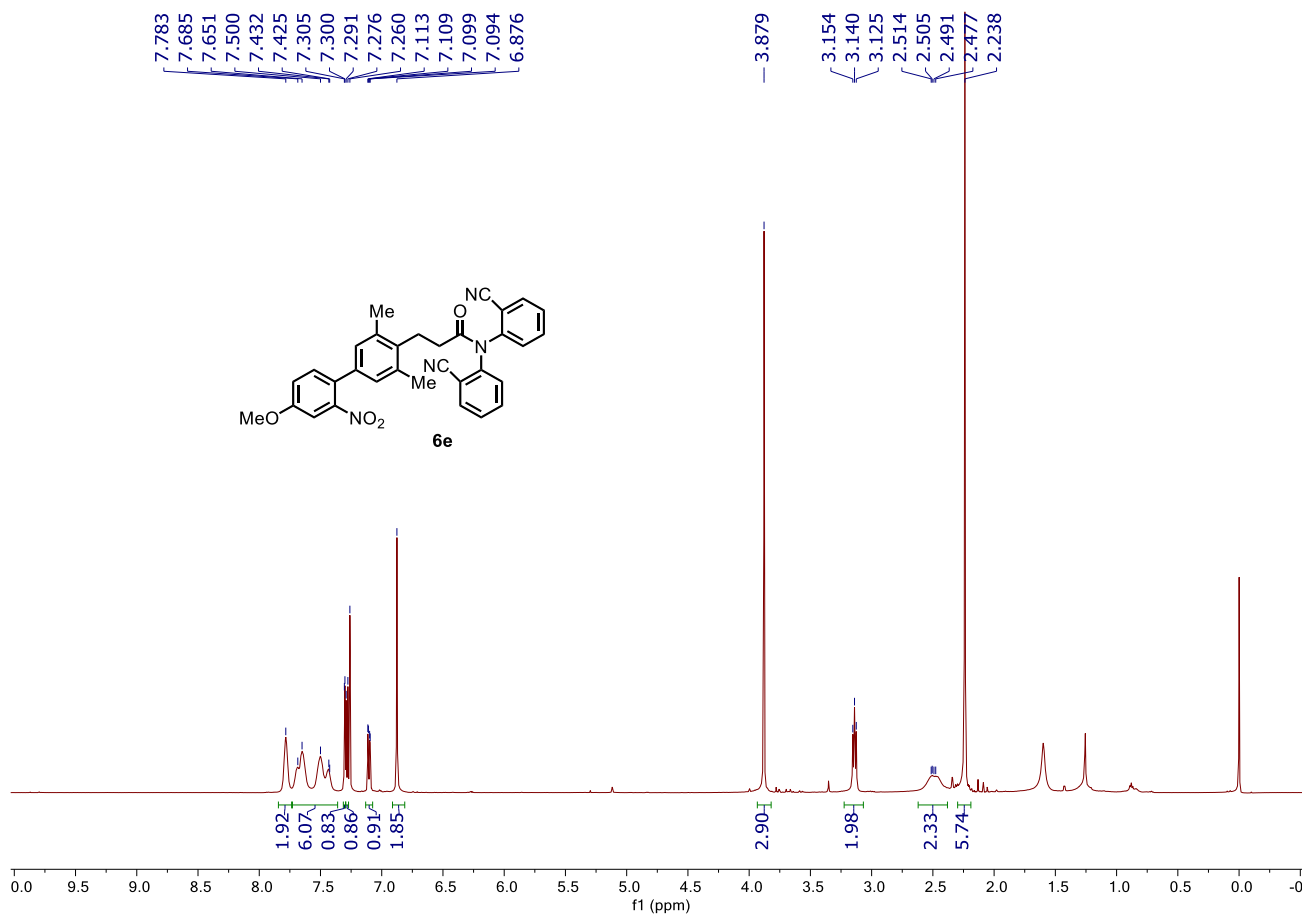

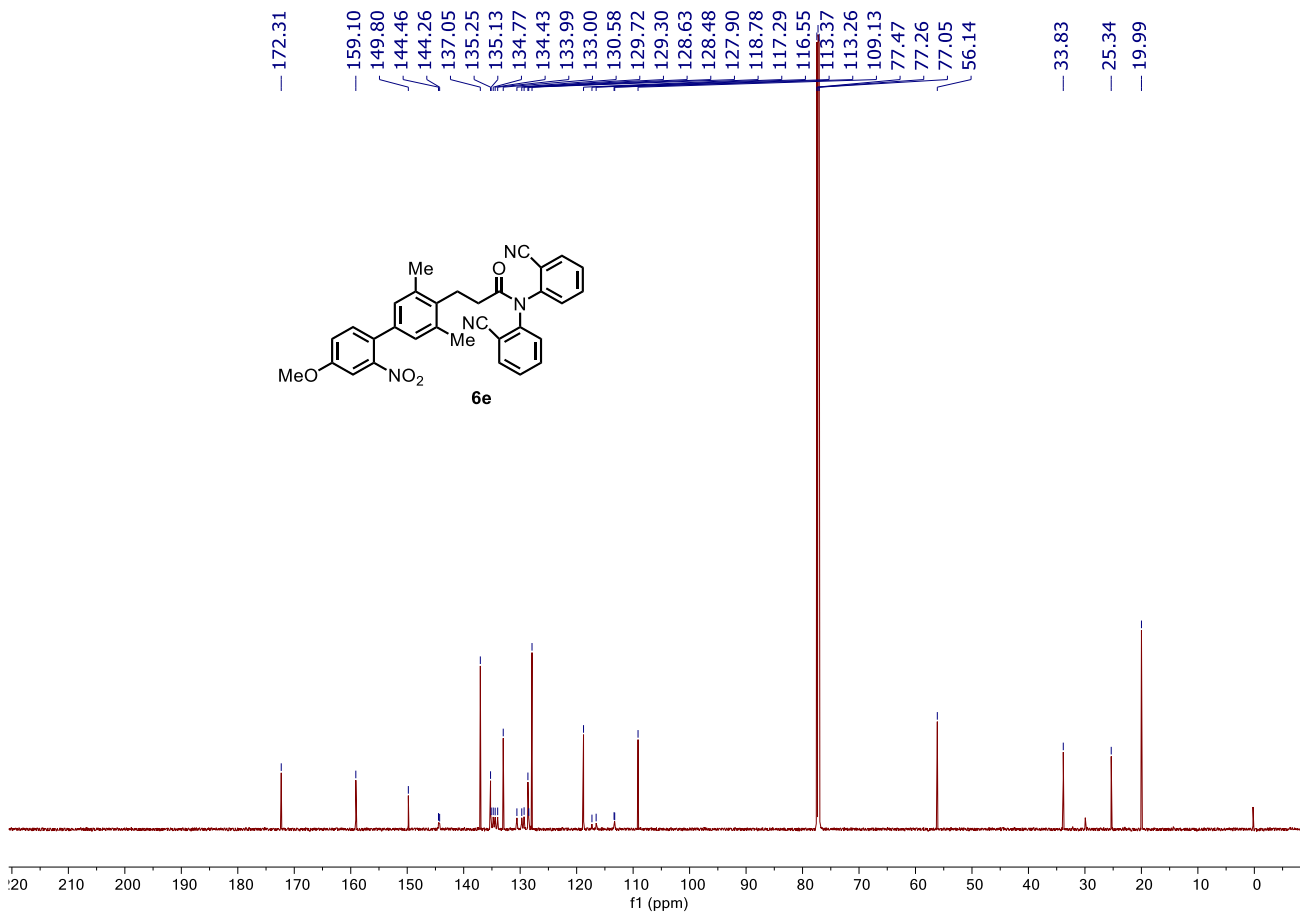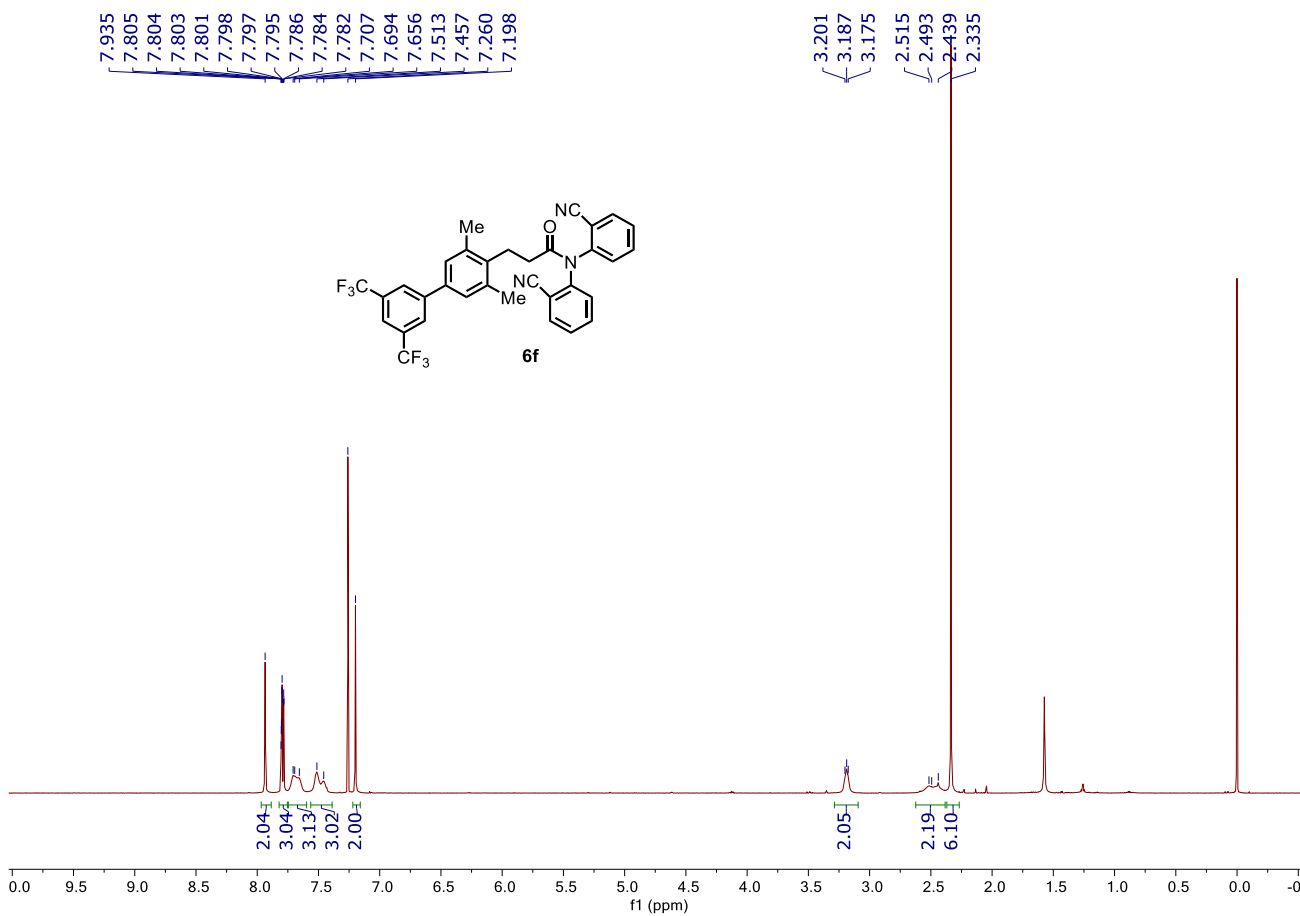

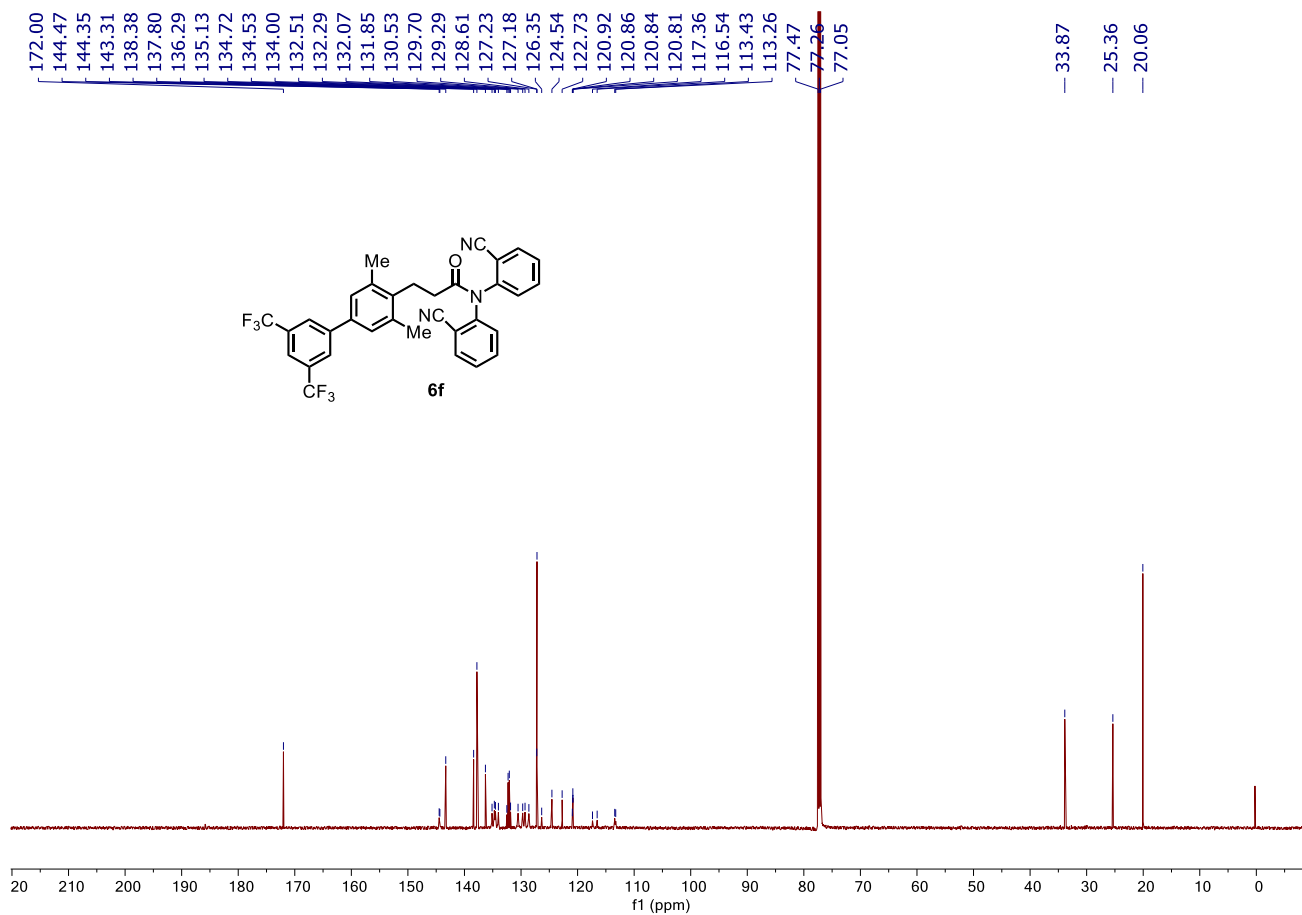

-63.114

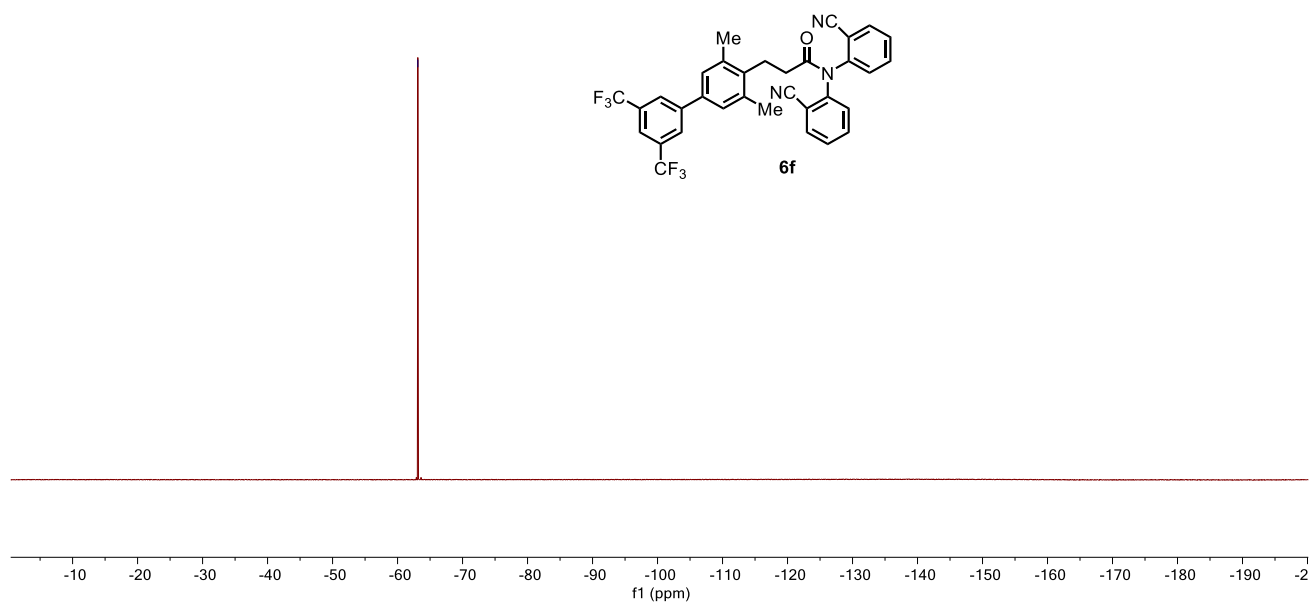

---

## REFERENCES

1. Shen, P.-X., Wang, X.-C., Wang, P., Zhu, R.-Y. & Yu, J.-Q. Ligand-enabled *meta*-C–H alkylation and arylation using a modified norbornene. *J. Am. Chem. Soc.* **137**, 11574–11577 (2015).
2. Zhang, Z., Tanaka, K. & Yu, J.-Q. Remote site-selective C–H activation directed by a catalytic bifunctional template nature. *Nature* **543**, 538–542 (2017).
3. Hong, F., Chen, Y., Lu, B. & Cheng, J. One-pot assembly of fused heterocycles *via* oxidative palladium-catalyzed cyclization of arylols and iodoarenes. *Adv. Synth. Catal.* **358**, 353–357 (2016).
4. Fu, H., et al. Ligand-enabled alkynylation of C(sp<sup>3</sup>)–H bonds with palladium(II) catalysts. *Angew. Chem., Int. Ed.* **56**, 1873–1876 (2017).
5. Yang, G., Zhu, D., Wang, P., Tang, R.-Y. & Yu, J.-Q. Remote C–H activation of various *N*-heterocycles using a single template. *Chem. Eur. J.* **24**, 3434–3438 (2018).
6. Leow, D., Li, G., Mei, T.-S. & Yu, J.-Q. Activation of remote *meta*-C–H bonds assisted by an end-on template. *Nature* **486**, 518–522 (2012).
7. *Gaussian 09, Revision A.02*, Frisch, M. J., et al. Gaussian, Inc., Wallingford CT, **2009**.
8. Becke, A. D. Density-functional thermochemistry. III. The role of exact exchange. *J. Chem. Phys.* **98**, 5648–5652 (1993).
9. Lee, C., Yang, W. & Parr, R. G. Development of the Colle-Salvetti correlation-energy formula into a functional of the electron density. *Phys. Rev. B* **37**, 785–789 (1988).
10. Becke, A. D. A new mixing of Hartree–Fock and local density-functional theories. *J. Chem. Phys.* **98**, 1372–1377 (1993).
11. Stephens, P. J., Devlin, F. J., Chabalowski, C. F. & Frisch, M. J. *Ab initio* calculation of vibrational absorption and circular dichroism spectra using density functional force fields. *J. Phys. Chem.* **98**, 11623–11627 (1994).
12. Ditchfield, R., Hehre, W. J. & Pople, J. A. Self-consistent molecular-orbital methods. IX. An extended Gaussian-type basis for molecular-orbital studies of organic molecules. *J. Chem. Phys.* **54**, 724–728 (1971).
13. Hehre, W. J., Ditchfield, R. & Pople, J. A. Self-consistent molecular orbital methods. XII. Further extensions of Gaussian-type basis sets for use in molecular orbital studies of organic molecules. *J. Chem. Phys.* **56**, 2257–2261 (1972).
14. Hay, P. J. & Wadt, W. R. *Ab initio* effective core potentials for molecular calculations. Potentials for K to Au including the outermost core orbitals. *J. Chem. Phys.* **82**, 299–310 (1985).
15. Roy, L. E., Hay, P. J. & Martin, R. L. Revised basis sets for the LANL effective core potentials. *J. Chem. Theory Comput.* **4**, 1029–1031 (2008).
16. Zhao, Y. & Truhlar, D. G. The M06 suite of density functionals for main group thermochemistry, thermochemical kinetics, noncovalent interactions, excited states, and transition elements: two new

- 
- functionals and systematic testing of four M06-class functionals and 12 other functionals. *Theor. Chem. Acc.* **120**, 215–241 (2008).
17. Marenich, A. V., Cramer, C. J. & Truhlar, D. G. Universal solvation model based on solute electron density and on a continuum model of the solvent defined by the bulk dielectric constant and atomic surface tensions. *J. Phys. Chem. B* **113**, 6378–6396 (2009).
  18. Dolg, M., Wedig, U., Stoll, H. & Preuss, H. Energy-adjusted *ab initio* pseudopotentials for the first row transition elements. *J. Chem. Phys.* **86**, 866–872 (1987).
  19. Andrae, D., Häußermann, U., Dolg, M., Stoll, H. & Preu, H. *Ab initio* energy-adjusted pseudopotentials for the noble gases Ne through Xe: Calculation of atomic dipole and quadrupole polarizabilities. *Theor. Chem. Acc.* **77**, 123–141 (1990).
  20. Legault, C. Y. CYLview, 1.0b; Universitéde Sherbrooke, 2009 (<http://www.cylview.org>).
  21. Hariharan, P. C. & Pople, J. A. The influence of polarization functions on molecular orbital hydrogenation energies. *Theor. Chim. Acta* **28**, 213–222 (1973).
